# Supplementary material for: Population-based plasma lipidomics reveals developmental changes in metabolism and signatures of obesity risk: a mother-offspring cohort study
Source: PubMed Central journal article supplement (PMC9310480; doi:10.1186/s12916-022-02432-y), 2022-07-25
Supplement: 12916_2022_2432_MOESM1_ESM.pdf [file 12916_2022_2432_MOESM1_ESM.pdf]

## Supplementary Information

### Population-based plasma lipidomics reveals developmental changes in metabolism and signatures of obesity risk: a mother-offspring cohort study

Sartaj Ahmad Mir, Li Chen, Satvika Burugupalli, Bo Burla, Shanshan Ji, Adam Alexander T. Smith, Kothandaraman Narasimhan, Adaikalavan Ramasamy, Karen Mei-Ling Tan, Kevin Huynh, Corey Giles, Ding Mei, Gerard Wong, Fabian Yap, Kok Hian Tan, Fiona Collier, Richard Saffery, Peter Vuillermin, Anne K. Bendt, David Burgner, Anne-Louise Ponsonby, Yung Seng Lee, Yap Seng Chong, Peter D Gluckman, Johan G. Eriksson, Peter J. Meikle, Markus R. Wenk and Neerja Karnani

#### Additional File 1: Fig. S1 – 10 and Table S1 – 5

**Fig. S1.** Outlier detection by principal component analysis of the lipidomics data at four time points

**Fig. S2.** Number of pairs between the participants in antenatal, postnatal, cord blood and child lipidomes

**Fig. S3.** Comparison of the results of linear regression and paired t-test

**Fig. S4.** Ratios of PC to PE levels and lysophospholipids (lysoPL)

**Fig. S5.** Scatter plots of effect sizes and adjusted p-values of plasma lipids associated with mother and child adiposity

**Fig. S6.** Correlation of pre-pregnancy, antenatal and postnatal maternal body mass indices (BMIs)

**Fig. S7.** Scatter plot of effect sizes in the pre-pregnancy and antenatal BMI studies.

**Fig. S8.** Overlapping plasma lipid signatures associated with mother and child adiposity

**Fig. S9.** Sex difference in the birth weight and child BMI studies

**Fig. S10.** Forest plots and volcano plots of the meta-analysis results in GUSTO and BIS for ppBMI and BW studies

**Table S1A.** Comparison of lipid classes across four sample groups (antenatal, postnatal, cord blood and 6-year-old child) using linear regression model

**Table S1B.** Comparison of lipid species across four sample groups (antenatal, postnatal, cord blood and 6-year-old child) using linear regression model

**Table S1C.** Comparison of lipid species across four sample groups (antenatal, postnatal, cord blood and 6-year-old child) using paired t-test.

**Table S2A.** Association of lipid classes with BMI or BW in four sample groups (antenatal, postnatal, cord blood and 6-year-old child) in terms of levels

**Table S2B.** Association of lipid species with BMI or BW in four sample groups (antenatal, postnatal, cord blood and 6-year-old child) in terms of levels

**Table S2C.** Association of antenatal lipidomic profiles with antenatal BMI

**Table S3A.** The overlapping lipid species between the ppBMI and postnatal BMI studies

**Table S3B.** The overlapping lipid species between the ppBMI and birth weight studies

**Table S3C.** The overlapping lipid species between the birth weight and 6-year-old child BMI studies

**Table S3D.** The overlapping lipid species between the 6-year-old child BMI and adult (postnatal mother) BMI studies

**Table S3E.** The overlapping lipid species in the four lipid-adiposity association studies

**Table S4A.** Sex difference in the birth weight and child BMI studies in terms of lipid class levels

**Table S4B.** Sex difference in the birth weight and child BMI in terms of species levels

**Table S5.** Association studies of lipids with pre-pregnancy BMI and birth weight in Barwon Infant Study (BIS), and the meta-analysis results of GUSTO and BIS

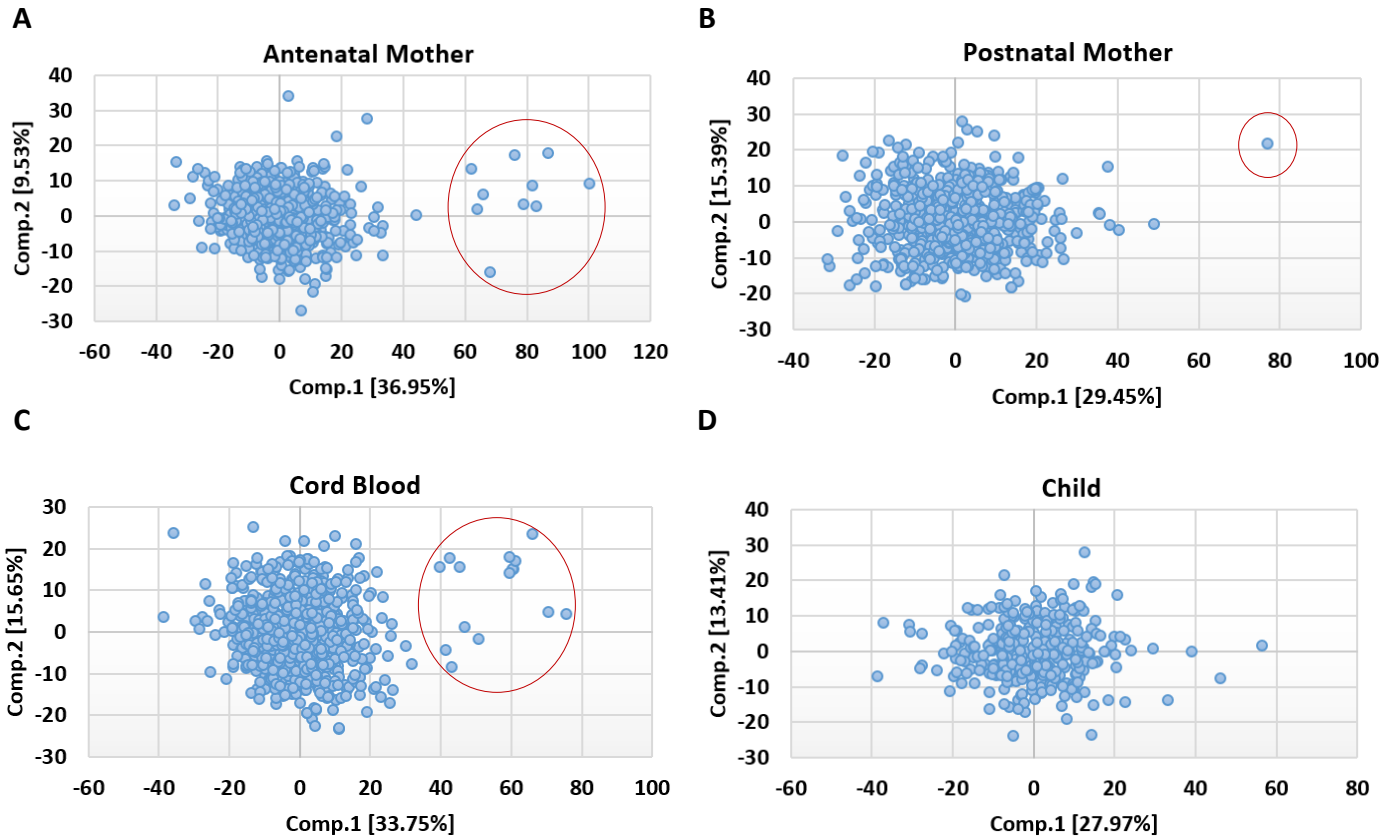

**Fig. S1.** Outlier detection by principal component analysis of the lipidomics data at four time points: (A) Antenatal mother (n=763). Eleven outliers are detected. (B) Postnatal mother (n=651). One outlier is detected (C) Cord blood (n=767). Fifteen outliers are detected. (D) child (n=338). No outlier is detected. The subjects within red ellipses are outliers.

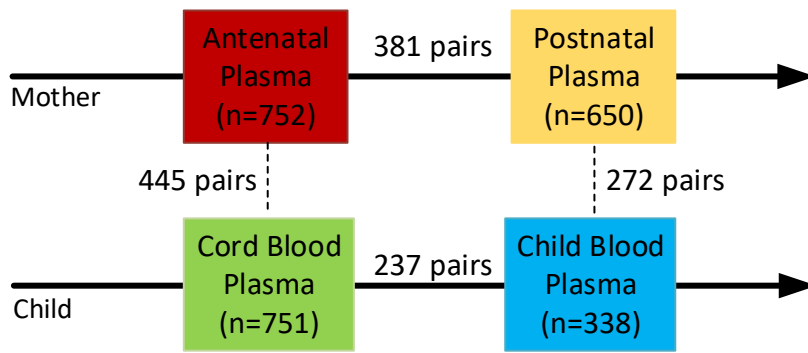

**Fig. S2.** Number of pairs between the participants in antenatal, postnatal, cord blood and child lipidomes

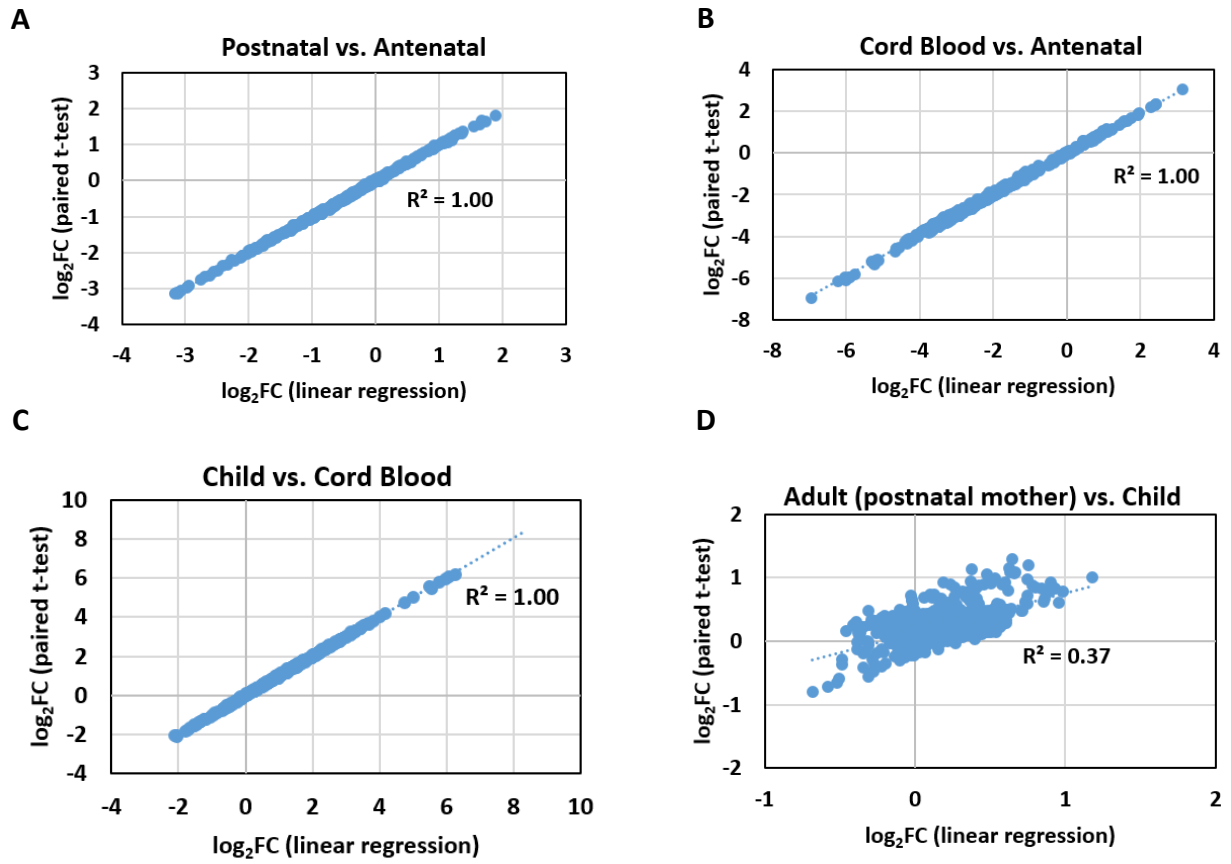

**Fig. S3.** Comparison of the results of linear regression and paired t-test: (A) Postnatal vs. Antenatal. (B) Cord Blood vs. Antenatal. (C) Child vs. Cord Blood. (D) Adult (postnatal mother) vs. Child.

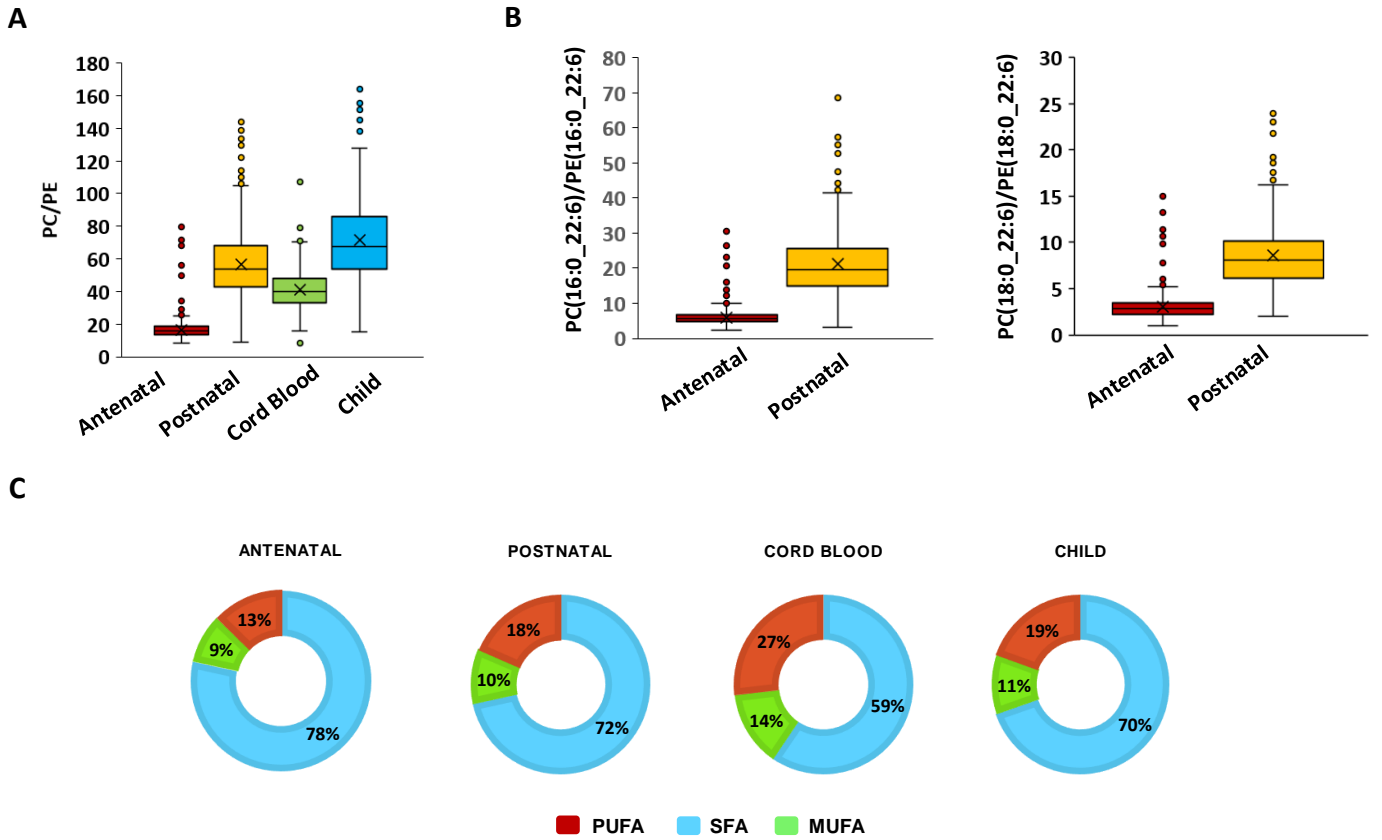

**Fig. S4.** Ratios of PC to PE levels and lysophospholipids (lysoPL): **(A)** Ratios of total PC to total PE levels in four sample groups. **(B)** Ratios of PC and PE lipid species containing DHA in antenatal and postnatal samples. **(C)** Percentage of lysoPL containing saturated fatty acid (SFA), monounsaturated fatty acid (MUFA) and polyunsaturated fatty acid (PUFA) in antenatal, postnatal, cord blood and child plasma.

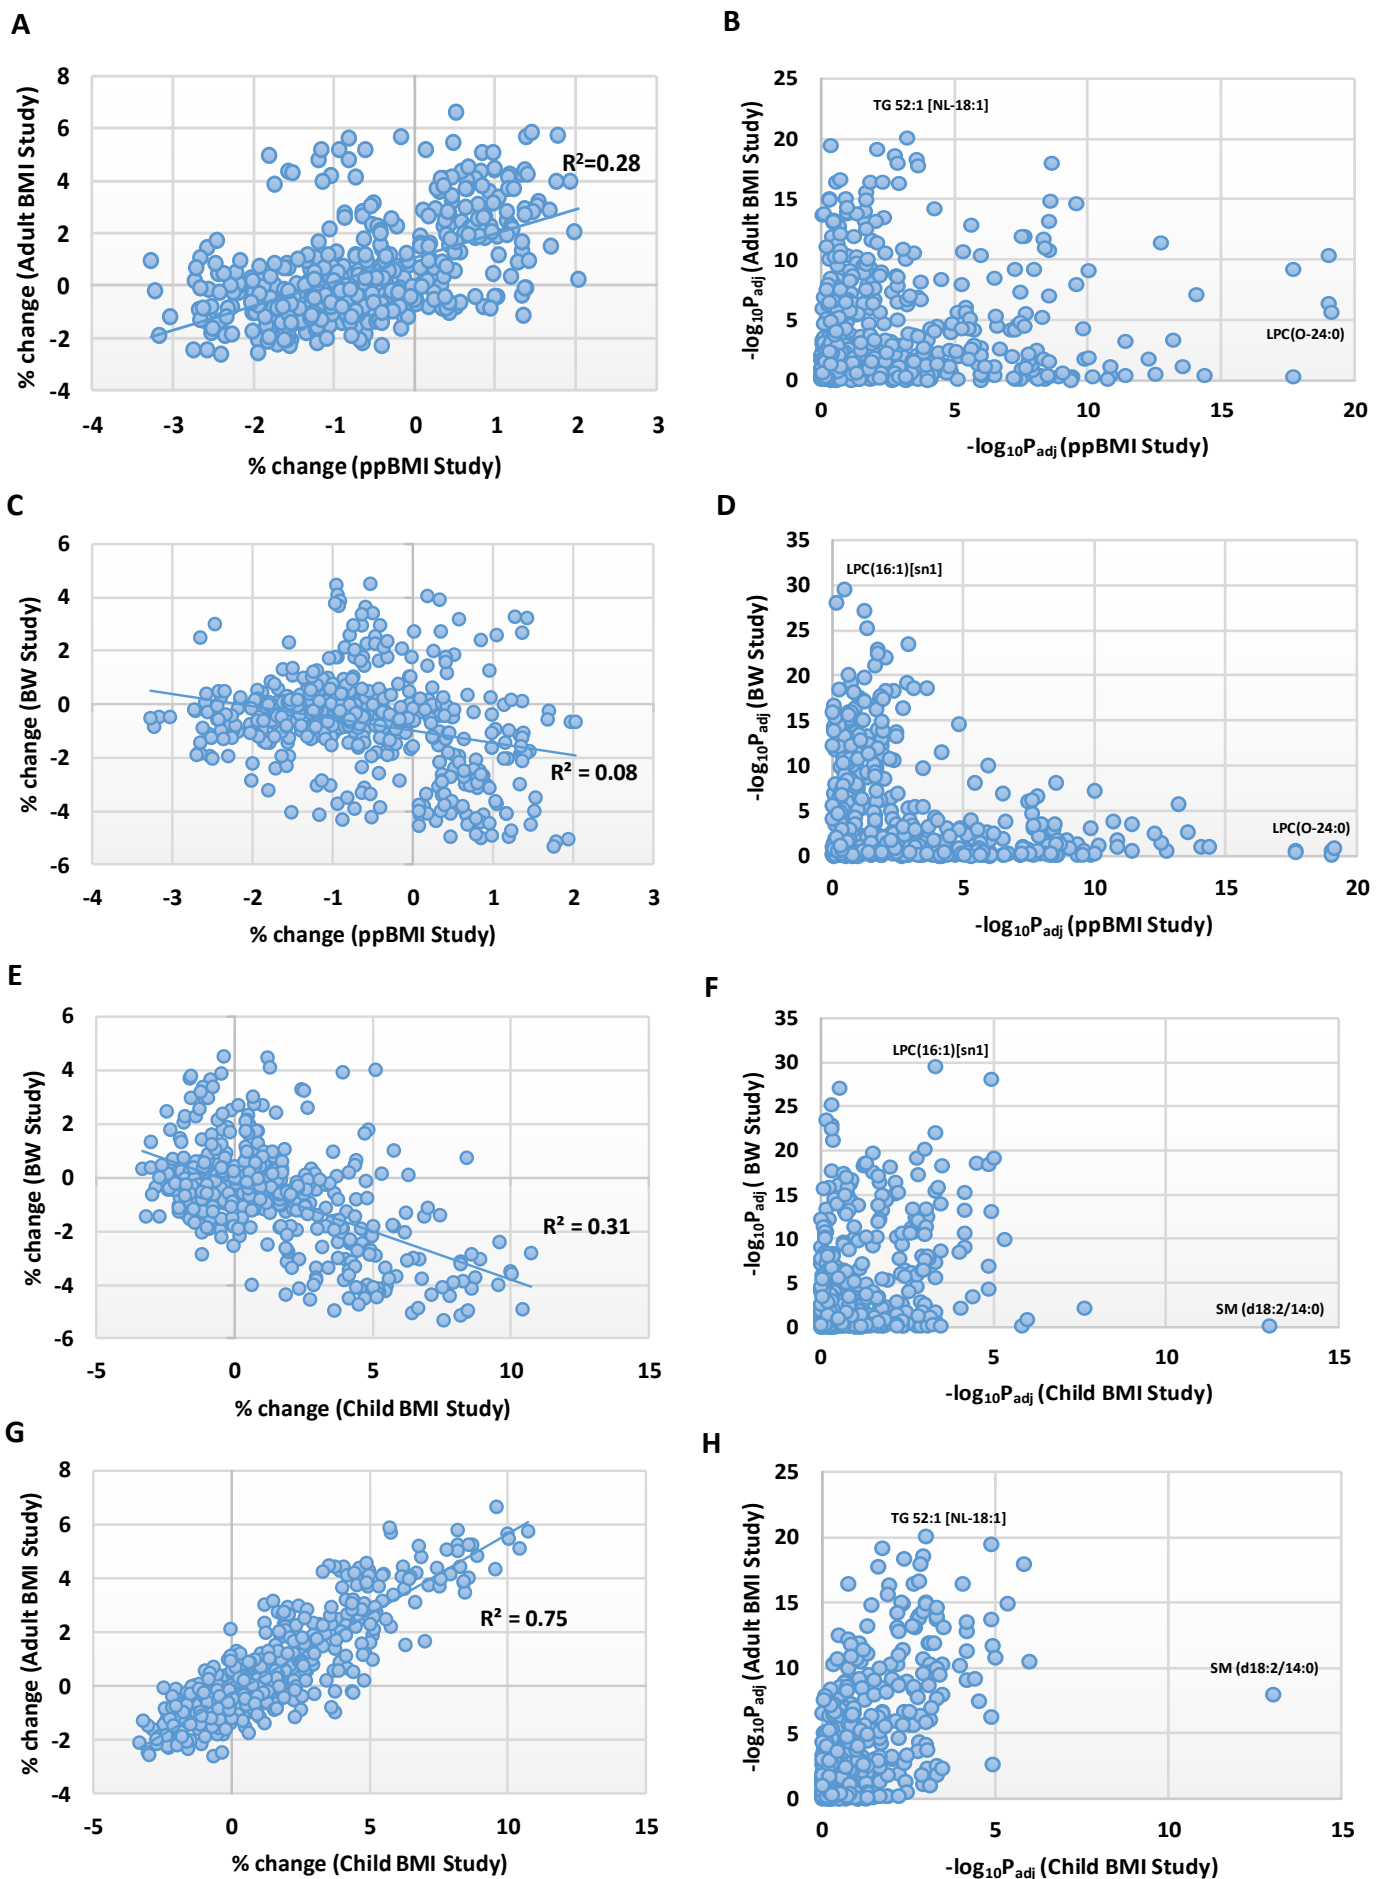

**Fig. S5.** Scatter plots of effect sizes and adjusted p-values of circulatory lipids associated with mother and child adiposity: (A-B) Pre-pregnancy BMI study vs. Adult (postnatal mother) BMI study. (C-D) Pre-pregnancy BMI study vs. BW study. (E-F) BW study vs. Child BMI study (6 years of age). (G-H) Child BMI study vs. Adult (postnatal mother) BMI study. Effect size is shown as % change in lipid concentration per unit BMI for BMI associations and per 100 grams for birth weight. The most significant lipid species are labelled in B,D,F and H.

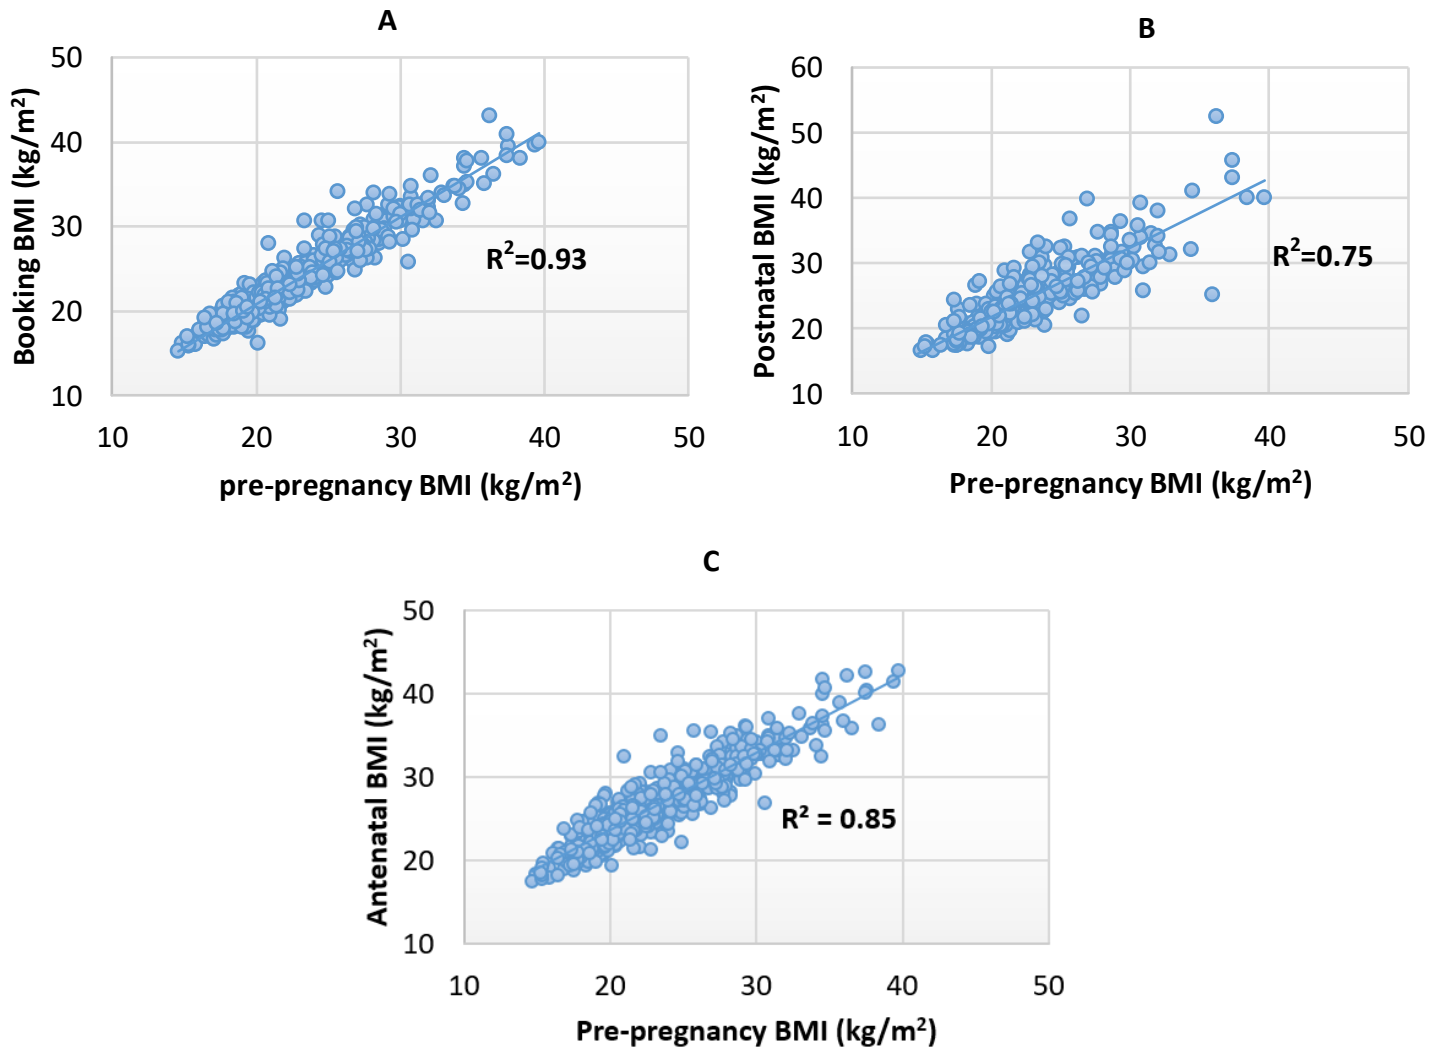

**Fig. S6.** Correlation of pre-pregnancy, antenatal and postnatal maternal body mass indices (BMIs): (A) Pre-pregnancy BMI vs booking BMI measured at the first clinical visit. (B) Pre-pregnancy BMI vs postnatal BMI (4-5 years after delivery). (C) Pre-pregnancy BMI vs. antenatal BMI (26-28 weeks of gestation)

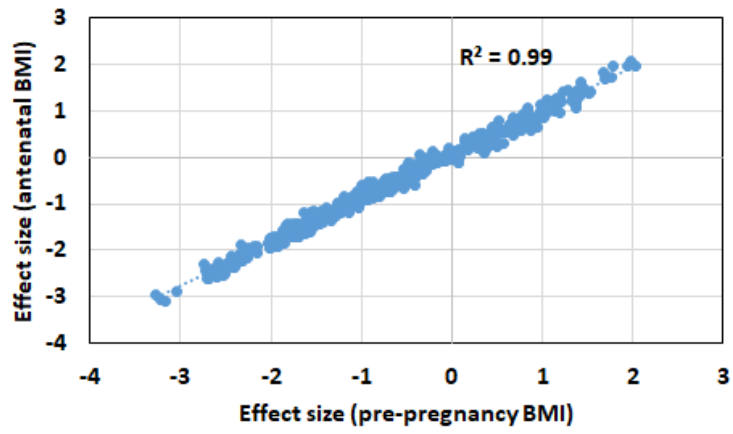

**Fig. S7.** Scatter plot of effect sizes in the pre-pregnancy and antenatal BMI studies. Effect size is % change in lipid concentration per unit BMI ( $\text{kg}/\text{m}^2$ )



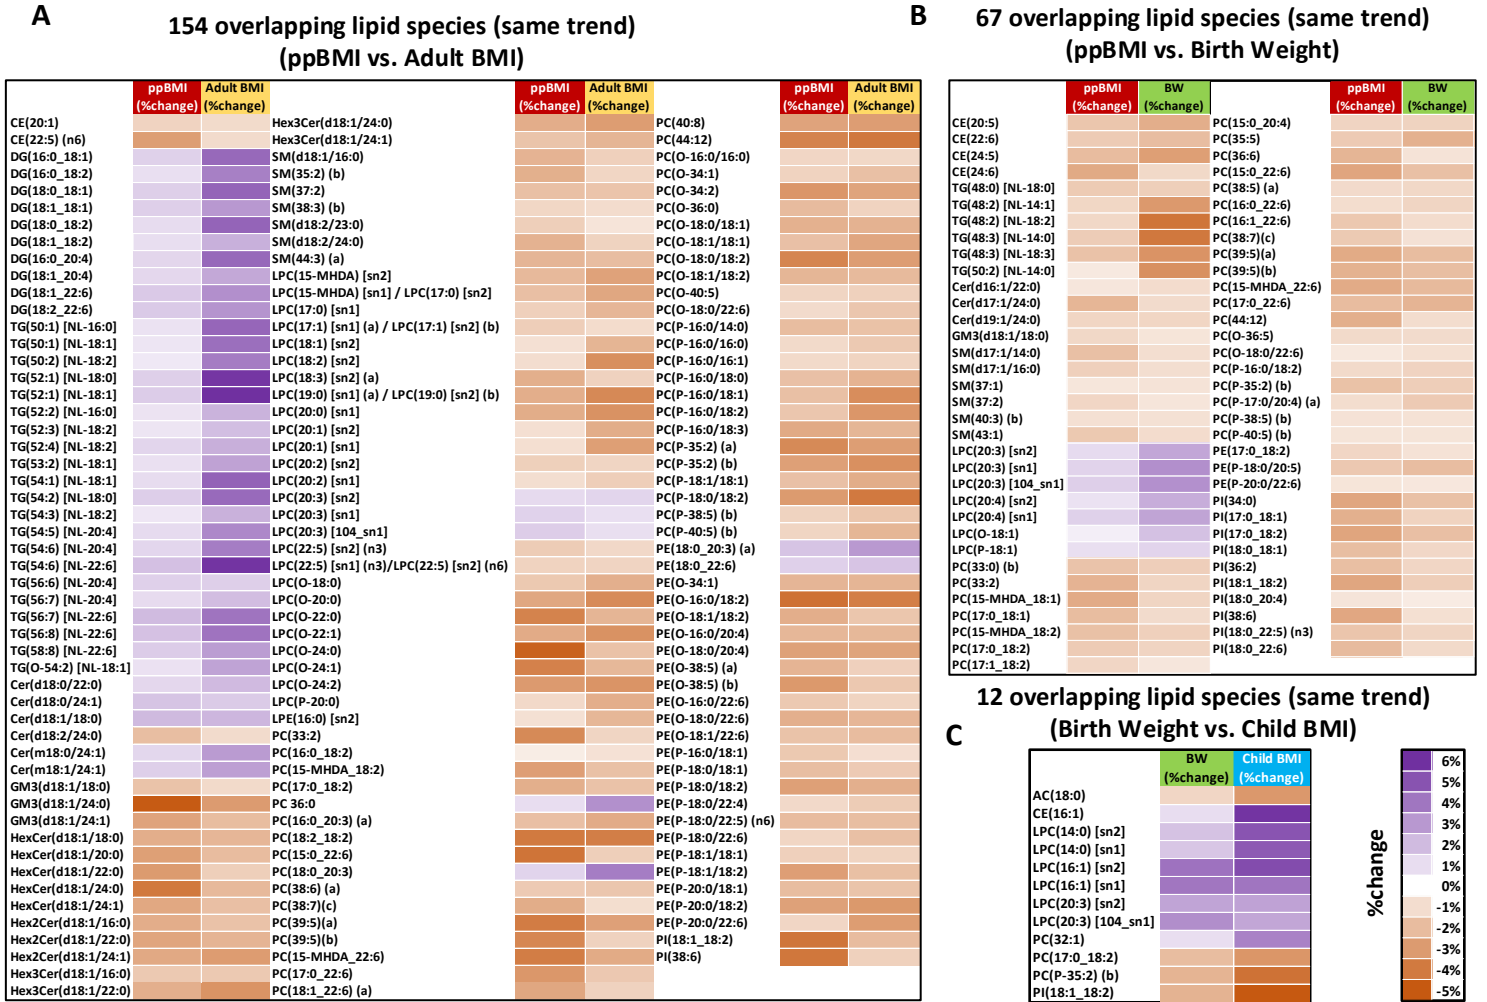

**Fig. S8.** Overlapping circulatory lipid signatures associated with mother and child adiposity: **(A)** Heat map of 154 overlapping lipid species with the same directionality of association between antenatal ppBMI study and adult (postnatal mother) BMI study. **(B)** Heat map of 67 overlapping lipid species with the same association trend between antenatal ppBMI study and cord blood BW study. **(C)** Heat map of 12 overlapping lipid species with the same association trend between cord blood BW study and child BMI study.

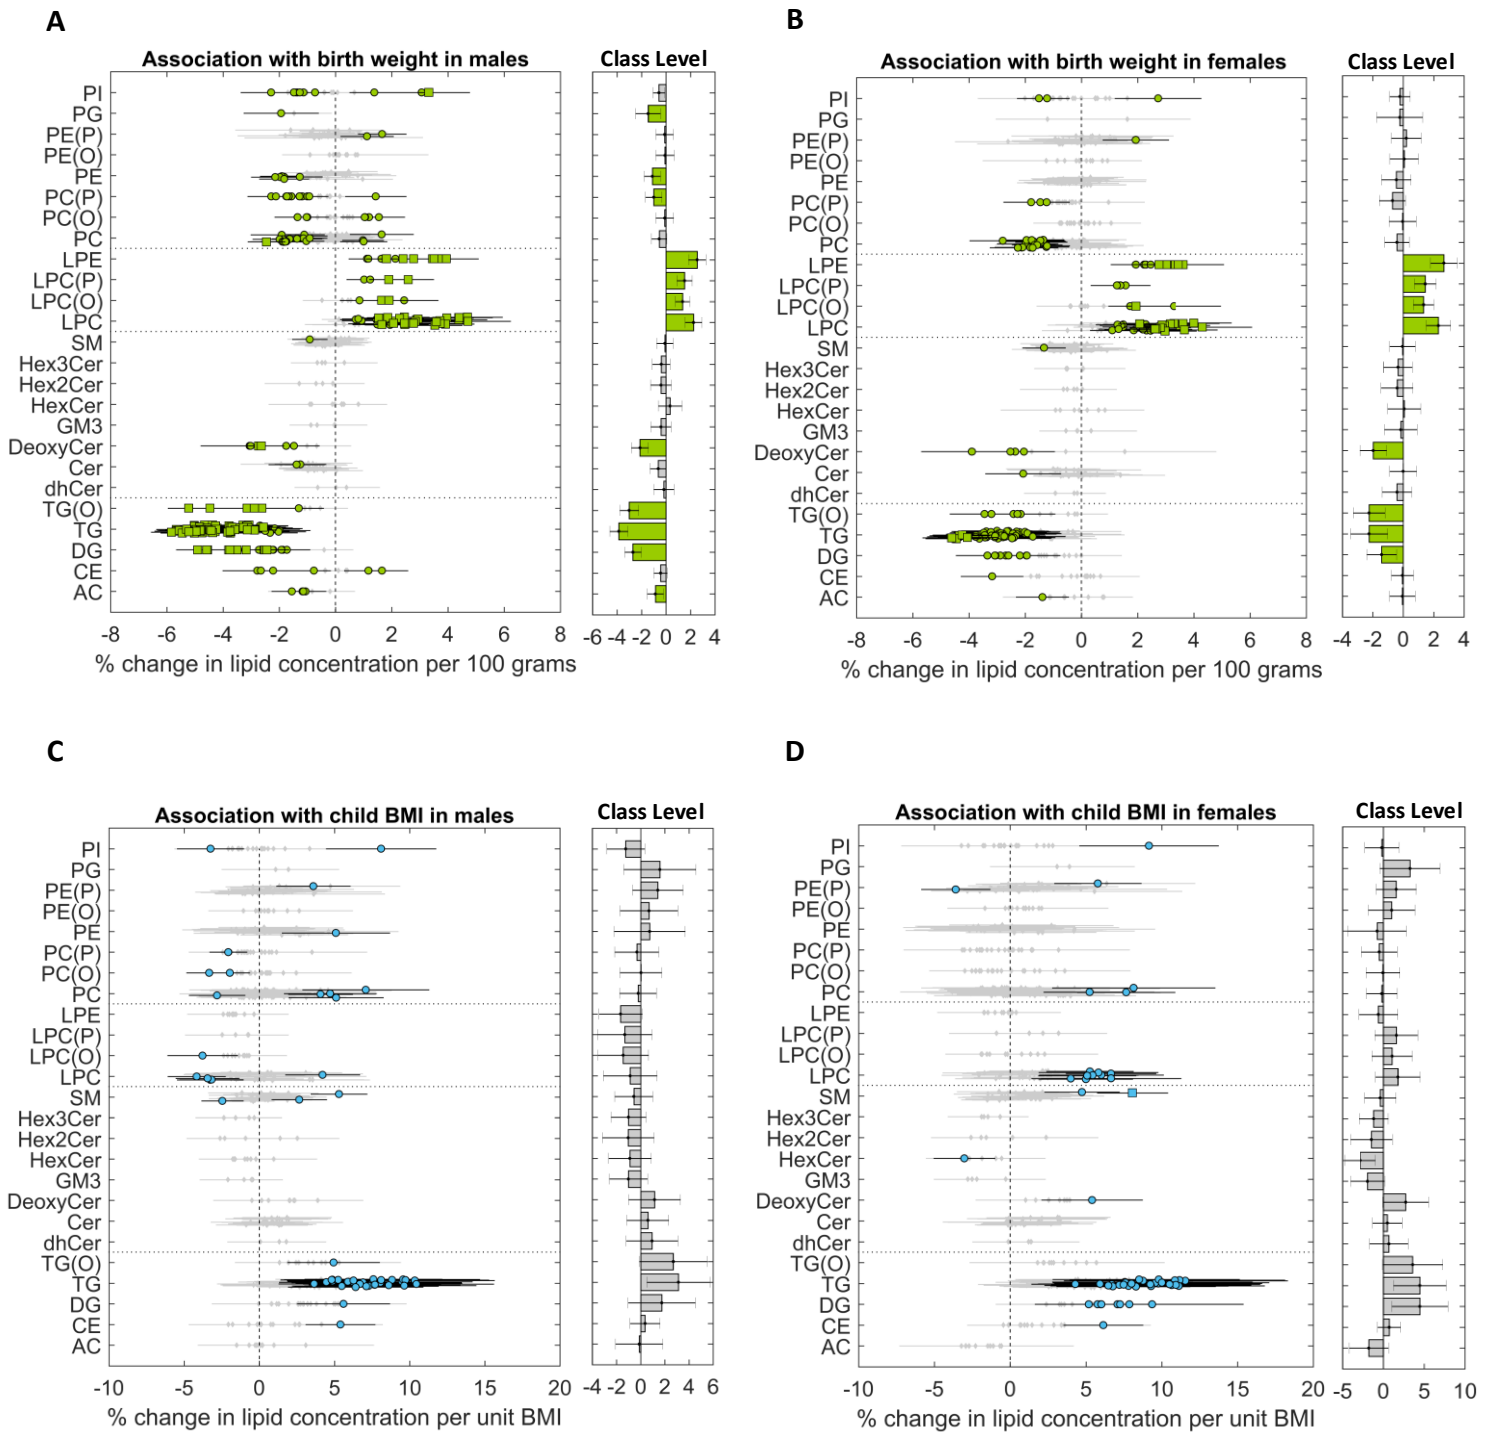

**Fig. S9.** Sex difference in the birth weight and child BMI studies: **(A)** Association with birth weight in males. **(B)** Association with birth weight in females. **(C)** Association with child BMI in males. **(D)** Association with child BMI in females. Diamond –  $P_{\text{adj}} \geq 0.05$  (grey), circle –  $P_{\text{adj}} < 0.05$  and square –  $P_{\text{adj}} < 1.00\text{E-}5$ .

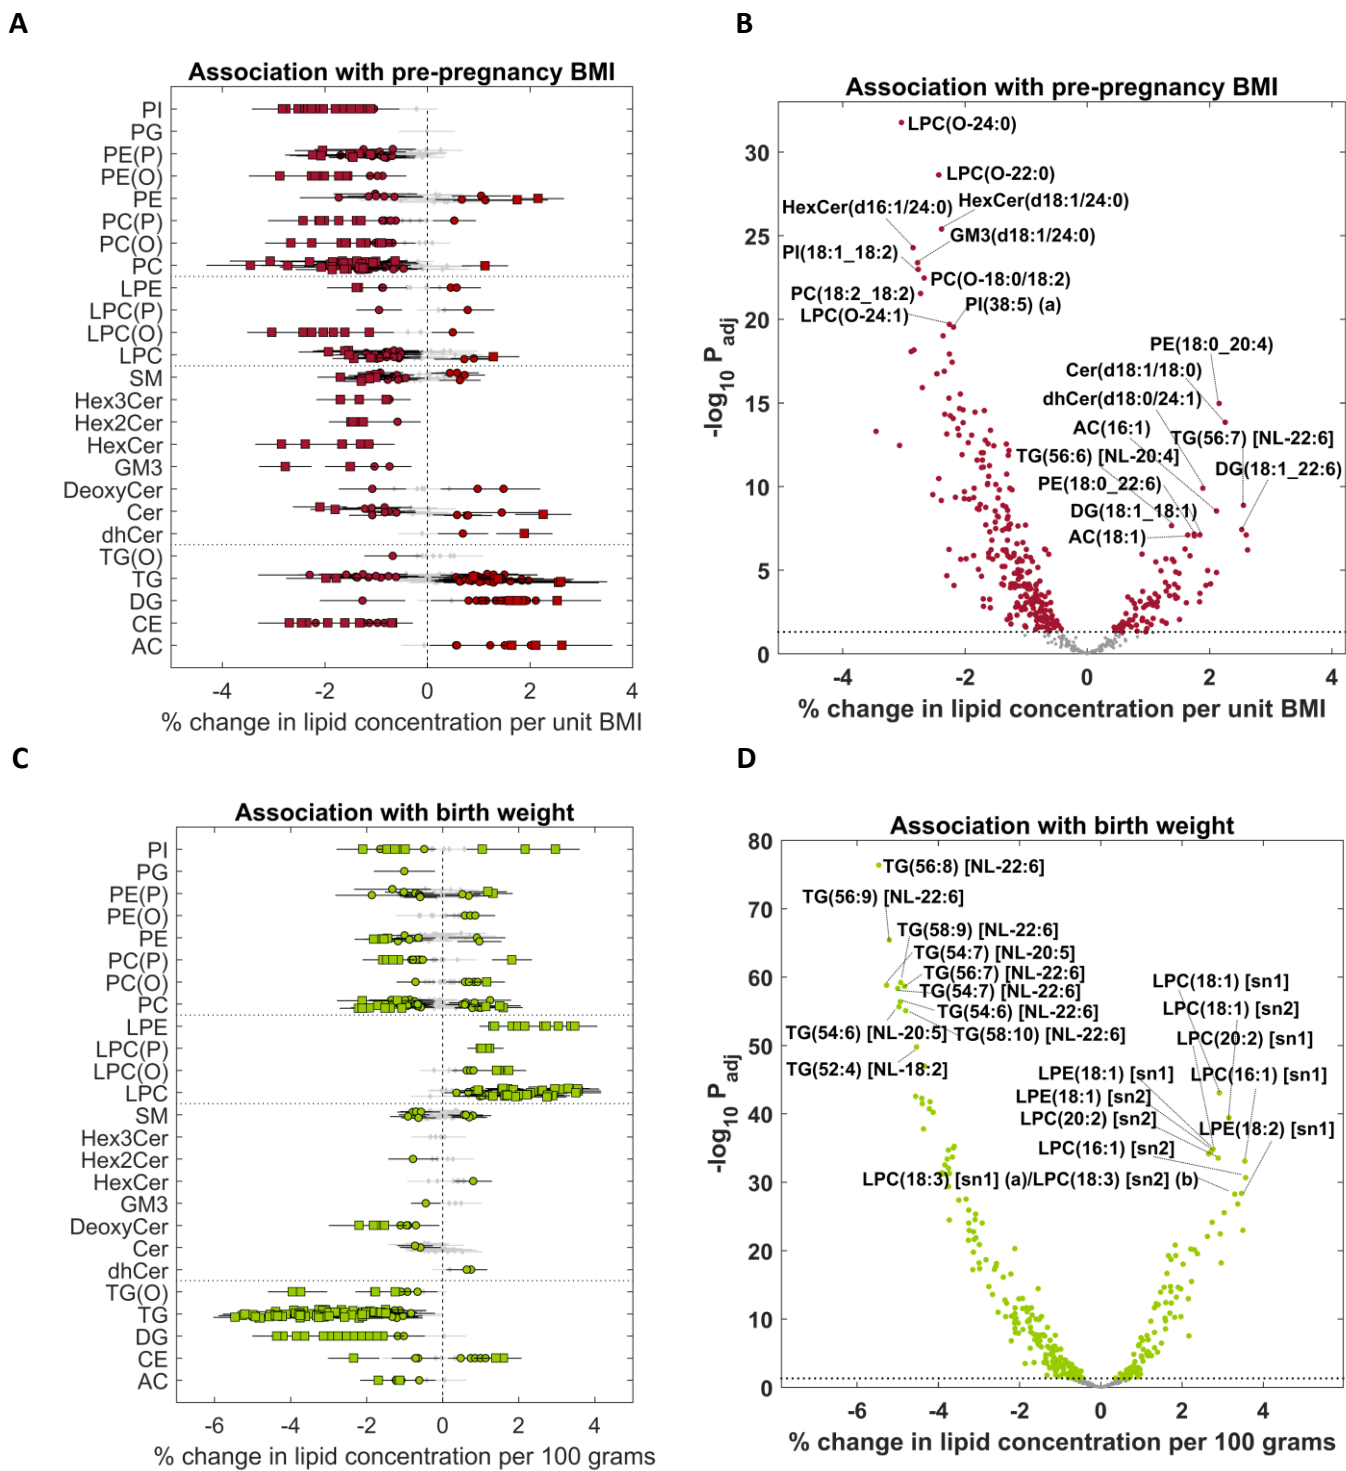

**Fig. S10.** Forest plots and volcano plots of the meta-analysis results in GUSTO and BIS for ppBMI (A and B) and BW studies (C and D). Diamond –  $P_{adj} \geq 0.05$  (grey), circle –  $P_{adj} < 0.05$  and square –  $P_{adj} < 1.00E-5$  in forest plots (A and C). Top 10 significant lipid species with positive and negative association are labelled in volcano plots (B and D, dotted line –  $P_{adj} = 0.05$ ).

**Table S1A.** Comparison of lipid classes across four sample groups (antenatal, postnatal, cord blood and 6-year-old child) using linear regression model. Related to Figure 1.

| Lipid Class | From antenatal to postnatal                                                          |               |                  |                  | From antenatal to cord blood                                                                                             |               |                  |                  | From birth to child                                                                     |               |                  |                  | From child to adult (postnatal)                               |              |                 |                 |
|-------------|--------------------------------------------------------------------------------------|---------------|------------------|------------------|--------------------------------------------------------------------------------------------------------------------------|---------------|------------------|------------------|-----------------------------------------------------------------------------------------|---------------|------------------|------------------|---------------------------------------------------------------|--------------|-----------------|-----------------|
|             | adjusted for ethnicity, maternal age, maternal education level and pre-pregnancy BMI |               |                  |                  | adjusted for ethnicity, maternal age, maternal education level, pre-pregnancy BMI, sex, gestational age and birth weight |               |                  |                  | adjusted for sex, ethnicity, maternal education level, gestational age and birth weight |               |                  |                  | adjusted for sex, ethnicity, BMI and maternal education level |              |                 |                 |
|             | log <sub>2</sub> FC<br>(Postnatal/Antenatal)                                         | 95%CI         | p-value          | p-value(BH)      | log <sub>2</sub> FC<br>(CordBlood/Antenatal)                                                                             | 95%CI         | p-value          | p-value(BH)      | log <sub>2</sub> FC<br>(Child/CordBlood)                                                | 95%CI         | p-value          | p-value(BH)      | log <sub>2</sub> FC<br>(Adult/Child)                          | 95%CI        | p-value         | p-value(BH)     |
| AC          | 1.23                                                                                 | (1.19-1.28)   | <b>2.31E-293</b> | <b>1.92E-292</b> | 0.40                                                                                                                     | (0.34-0.46)   | <b>9.89E-38</b>  | <b>1.08E-37</b>  | 0.70                                                                                    | (0.64-0.76)   | <b>1.82E-107</b> | <b>2.68E-107</b> | 0.04                                                          | (-0.06-0.14) | 4.23E-01        | 5.28E-01        |
| CE          | -0.05                                                                                | (-0.07--0.02) | <b>1.05E-03</b>  | <b>1.19E-03</b>  | -1.56                                                                                                                    | (-1.6--1.52)  | <b>0.00E+00</b>  | <b>0.00E+00</b>  | 1.34                                                                                    | (1.3-1.38)    | <b>0.00E+00</b>  | <b>0.00E+00</b>  | 0.24                                                          | (0.18-0.3)   | <b>5.16E-15</b> | <b>2.15E-14</b> |
| DG          | -1.01                                                                                | (-1.08--0.95) | <b>1.67E-161</b> | <b>4.18E-161</b> | -3.04                                                                                                                    | (-3.11--2.96) | <b>0.00E+00</b>  | <b>0.00E+00</b>  | 1.60                                                                                    | (1.53-1.68)   | <b>1.74E-236</b> | <b>3.62E-236</b> | -0.05                                                         | (-0.19-0.1)  | 5.50E-01        | 6.54E-01        |
| TG          | -1.00                                                                                | (-1.06--0.95) | <b>5.58E-211</b> | <b>1.99E-210</b> | -2.87                                                                                                                    | (-2.95--2.79) | <b>0.00E+00</b>  | <b>0.00E+00</b>  | 1.32                                                                                    | (1.23-1.41)   | <b>8.51E-134</b> | <b>1.42E-133</b> | 0.03                                                          | (-0.11-0.16) | 6.98E-01        | 7.58E-01        |
| TG(O)       | -0.97                                                                                | (-1.03--0.91) | <b>8.38E-160</b> | <b>1.91E-159</b> | -2.95                                                                                                                    | (-3.03--2.87) | <b>0.00E+00</b>  | <b>0.00E+00</b>  | 1.55                                                                                    | (1.47-1.63)   | <b>1.27E-191</b> | <b>2.26E-191</b> | -0.09                                                         | (-0.24-0.06) | 2.60E-01        | 3.42E-01        |
| dhCer       | -0.12                                                                                | (-0.17--0.07) | <b>7.00E-06</b>  | <b>8.75E-06</b>  | 0.22                                                                                                                     | (0.16-0.28)   | <b>8.89E-13</b>  | <b>8.89E-13</b>  | -0.48                                                                                   | (-0.54--0.42) | <b>1.01E-50</b>  | <b>1.27E-50</b>  | -0.02                                                         | (-0.13-0.09) | 7.40E-01        | 7.71E-01        |
| Cer         | 0.18                                                                                 | (0.14-0.22)   | <b>4.54E-19</b>  | <b>6.67E-19</b>  | -2.14                                                                                                                    | (-2.19--2.09) | <b>0.00E+00</b>  | <b>0.00E+00</b>  | 2.10                                                                                    | (2.05-2.15)   | <b>0.00E+00</b>  | <b>0.00E+00</b>  | 0.17                                                          | (0.09-0.26)  | <b>7.48E-05</b> | <b>1.25E-04</b> |
| DeoxyCer    | -0.61                                                                                | (-0.67--0.55) | <b>1.63E-69</b>  | <b>3.39E-69</b>  | -1.96                                                                                                                    | (-2.03--1.88) | <b>0.00E+00</b>  | <b>0.00E+00</b>  | 0.87                                                                                    | (0.8-0.93)    | <b>2.58E-118</b> | <b>4.03E-118</b> | 0.13                                                          | (0-0.25)     | 5.46E-02        | 7.58E-02        |
| GM3         | 0.20                                                                                 | (0.16-0.25)   | <b>7.95E-18</b>  | <b>1.10E-17</b>  | -0.25                                                                                                                    | (-0.31--0.19) | <b>1.61E-15</b>  | <b>1.67E-15</b>  | 0.37                                                                                    | (0.31-0.43)   | <b>3.97E-32</b>  | <b>4.51E-32</b>  | 0.24                                                          | (0.15-0.33)  | <b>2.64E-07</b> | <b>5.49E-07</b> |
| HexCer      | 0.12                                                                                 | (0.08-0.16)   | <b>1.31E-08</b>  | <b>1.72E-08</b>  | -1.30                                                                                                                    | (-1.36--1.24) | <b>1.24E-247</b> | <b>1.83E-247</b> | 1.35                                                                                    | (1.29-1.41)   | <b>2.88E-238</b> | <b>6.54E-238</b> | 0.23                                                          | (0.14-0.32)  | <b>5.09E-07</b> | <b>9.78E-07</b> |
| Hex2Cer     | -0.07                                                                                | (-0.12--0.02) | <b>3.61E-03</b>  | <b>3.92E-03</b>  | -2.17                                                                                                                    | (-2.23--2.11) | <b>0.00E+00</b>  | <b>0.00E+00</b>  | 1.76                                                                                    | (1.69-1.82)   | <b>4.98E-304</b> | <b>1.38E-303</b> | 0.51                                                          | (0.41-0.62)  | <b>1.79E-20</b> | <b>2.24E-19</b> |
| Hex3Cer     | 0.19                                                                                 | (0.15-0.22)   | <b>2.80E-22</b>  | <b>4.38E-22</b>  | -0.85                                                                                                                    | (-0.9--0.8)   | <b>1.89E-171</b> | <b>2.62E-171</b> | 1.06                                                                                    | (1.01-1.11)   | <b>3.87E-212</b> | <b>7.44E-212</b> | 0.11                                                          | (0.03-0.19)  | <b>7.60E-03</b> | <b>1.12E-02</b> |
| SM          | -0.32                                                                                | (-0.36--0.28) | <b>1.64E-51</b>  | <b>3.16E-51</b>  | -1.85                                                                                                                    | (-1.9--1.8)   | <b>0.00E+00</b>  | <b>0.00E+00</b>  | 1.29                                                                                    | (1.24-1.34)   | <b>2.07E-298</b> | <b>5.17E-298</b> | 0.30                                                          | (0.22-0.39)  | <b>6.36E-12</b> | <b>1.77E-11</b> |
| LPC         | 0.90                                                                                 | (0.86-0.95)   | <b>7.17E-246</b> | <b>2.99E-245</b> | 0.40                                                                                                                     | (0.36-0.45)   | <b>7.90E-60</b>  | <b>8.98E-60</b>  | 0.25                                                                                    | (0.2-0.3)     | <b>3.53E-21</b>  | <b>3.67E-21</b>  | 0.49                                                          | (0.38-0.59)  | <b>5.78E-20</b> | <b>3.61E-19</b> |
| LPC(O)      | 0.87                                                                                 | (0.83-0.9)    | <b>8.75E-280</b> | <b>5.47E-279</b> | 0.37                                                                                                                     | (0.33-0.41)   | <b>1.82E-66</b>  | <b>2.17E-66</b>  | 0.25                                                                                    | (0.2-0.29)    | <b>7.27E-25</b>  | <b>7.91E-25</b>  | 0.46                                                          | (0.37-0.56)  | <b>8.65E-22</b> | <b>2.16E-20</b> |
| LPC(P)      | 1.14                                                                                 | (1.1-1.18)    | <b>0.00E+00</b>  | <b>0.00E+00</b>  | 0.68                                                                                                                     | (0.63-0.72)   | <b>1.26E-163</b> | <b>1.66E-163</b> | 0.17                                                                                    | (0.13-0.22)   | <b>3.49E-12</b>  | <b>3.49E-12</b>  | 0.47                                                          | (0.38-0.57)  | <b>3.10E-20</b> | <b>2.59E-19</b> |
| LPE         | 0.31                                                                                 | (0.27-0.36)   | <b>1.57E-46</b>  | <b>2.80E-46</b>  | 0.49                                                                                                                     | (0.45-0.54)   | <b>4.94E-88</b>  | <b>6.17E-88</b>  | -0.38                                                                                   | (-0.43--0.33) | <b>1.79E-49</b>  | <b>2.14E-49</b>  | 0.44                                                          | (0.34-0.54)  | <b>2.79E-18</b> | <b>1.39E-17</b> |
| PC          | -0.63                                                                                | (-0.67--0.6)  | <b>5.16E-194</b> | <b>1.61E-193</b> | -2.35                                                                                                                    | (-2.39--2.3)  | <b>0.00E+00</b>  | <b>0.00E+00</b>  | 1.56                                                                                    | (1.51-1.6)    | <b>0.00E+00</b>  | <b>0.00E+00</b>  | 0.21                                                          | (0.13-0.29)  | <b>6.15E-07</b> | <b>1.10E-06</b> |
| PC(O)       | -0.22                                                                                | (-0.27--0.18) | <b>4.62E-24</b>  | <b>7.70E-24</b>  | -1.85                                                                                                                    | (-1.91--1.8)  | <b>0.00E+00</b>  | <b>0.00E+00</b>  | 1.46                                                                                    | (1.41-1.51)   | <b>0.00E+00</b>  | <b>0.00E+00</b>  | 0.33                                                          | (0.24-0.42)  | <b>4.38E-12</b> | <b>1.37E-11</b> |
| PC(P)       | -0.08                                                                                | (-0.13--0.04) | <b>5.40E-04</b>  | <b>6.43E-04</b>  | -1.76                                                                                                                    | (-1.81--1.7)  | <b>0.00E+00</b>  | <b>0.00E+00</b>  | 1.50                                                                                    | (1.44-1.55)   | <b>6.78E-307</b> | <b>2.12E-306</b> | 0.37                                                          | (0.27-0.46)  | <b>2.66E-13</b> | <b>9.49E-13</b> |
| PE          | -2.36                                                                                | (-2.42--2.29) | <b>0.00E+00</b>  | <b>0.00E+00</b>  | -3.70                                                                                                                    | (-3.76--3.64) | <b>0.00E+00</b>  | <b>0.00E+00</b>  | 0.82                                                                                    | (0.75-0.88)   | <b>4.98E-100</b> | <b>6.55E-100</b> | 0.48                                                          | (0.32-0.63)  | <b>3.67E-09</b> | <b>9.17E-09</b> |
| PE(O)       | 0.02                                                                                 | (-0.04-0.07)  | 5.93E-01         | 5.93E-01         | -2.94                                                                                                                    | (-3--2.87)    | <b>0.00E+00</b>  | <b>0.00E+00</b>  | 2.77                                                                                    | (2.71-2.83)   | <b>0.00E+00</b>  | <b>0.00E+00</b>  | 0.35                                                          | (0.23-0.48)  | <b>7.57E-08</b> | <b>1.72E-07</b> |
| PE(P)       | -0.06                                                                                | (-0.11--0.01) | <b>2.80E-02</b>  | <b>2.92E-02</b>  | -2.70                                                                                                                    | (-2.76--2.64) | <b>0.00E+00</b>  | <b>0.00E+00</b>  | 2.73                                                                                    | (2.67-2.78)   | <b>0.00E+00</b>  | <b>0.00E+00</b>  | 0.01                                                          | (-0.1-0.12)  | 8.06E-01        | 8.06E-01        |
| PG          | -1.04                                                                                | (-1.1--0.98)  | <b>1.19E-173</b> | <b>3.31E-173</b> | -2.50                                                                                                                    | (-2.58--2.42) | <b>0.00E+00</b>  | <b>0.00E+00</b>  | 1.11                                                                                    | (1.02-1.2)    | <b>5.87E-105</b> | <b>8.15E-105</b> | 0.04                                                          | (-0.11-0.2)  | 5.88E-01        | 6.68E-01        |
| PI          | -1.04                                                                                | (-1.08--1)    | <b>8.26E-279</b> | <b>4.13E-278</b> | -2.36                                                                                                                    | (-2.4--2.31)  | <b>0.00E+00</b>  | <b>0.00E+00</b>  | 1.18                                                                                    | (1.14-1.22)   | <b>0.00E+00</b>  | <b>0.00E+00</b>  | 0.15                                                          | (0.06-0.25)  | <b>1.21E-03</b> | <b>1.89E-03</b> |





















|     |    |                    |       |               |                  |                  |       |               |                  |                  |       |               |                  |                  |       |               |                 |                 |
|-----|----|--------------------|-------|---------------|------------------|------------------|-------|---------------|------------------|------------------|-------|---------------|------------------|------------------|-------|---------------|-----------------|-----------------|
| 462 | PI | PI(16:0_16:1)      | -1.94 | (-2.04--1.84) | <b>4.93E-220</b> | <b>3.24E-219</b> | -2.64 | (-2.74--2.54) | <b>0.00E+00</b>  | <b>0.00E+00</b>  | 0.54  | (0.45-0.62)   | <b>4.54E-33</b>  | <b>5.74E-33</b>  | -0.36 | (-0.56--0.17) | <b>3.11E-04</b> | <b>5.95E-04</b> |
| 463 | PI | PI(34:0)           | -3.12 | (-3.21--3.03) | <b>0.00E+00</b>  | <b>0.00E+00</b>  | -5.31 | (-5.44--5.19) | <b>0.00E+00</b>  | <b>0.00E+00</b>  | 1.64  | (1.52-1.77)   | <b>4.45E-112</b> | <b>7.80E-112</b> | 0.37  | (0.17-0.58)   | <b>4.66E-04</b> | <b>8.77E-04</b> |
| 464 | PI | PI(34:1)           | -1.63 | (-1.7--1.57)  | <b>0.00E+00</b>  | <b>0.00E+00</b>  | -4.31 | (-4.38--4.25) | <b>0.00E+00</b>  | <b>0.00E+00</b>  | 2.57  | (2.51-2.63)   | <b>0.00E+00</b>  | <b>0.00E+00</b>  | 0.09  | (-0.05-0.22)  | 2.20E-01        | 2.65E-01        |
| 465 | PI | PI(17:0_18:1)      | -1.46 | (-1.52--1.4)  | <b>9.61E-290</b> | <b>1.18E-288</b> | -4.28 | (-4.37--4.19) | <b>0.00E+00</b>  | <b>0.00E+00</b>  | 2.65  | (2.55-2.75)   | <b>6.49E-305</b> | <b>2.94E-304</b> | 0.03  | (-0.12-0.17)  | 7.24E-01        | 7.63E-01        |
| 466 | PI | PI(17:0_18:2)      | -1.44 | (-1.51--1.38) | <b>2.02E-277</b> | <b>2.21E-276</b> | -4.39 | (-4.48--4.29) | <b>0.00E+00</b>  | <b>0.00E+00</b>  | 2.64  | (2.53-2.74)   | <b>8.74E-283</b> | <b>3.53E-282</b> | 0.11  | (-0.03-0.25)  | 1.16E-01        | 1.48E-01        |
| 467 | PI | PI(18:0_18:1)      | -1.69 | (-1.75--1.62) | <b>0.00E+00</b>  | <b>6.40E-308</b> | -6.03 | (-6.1--5.95)  | <b>0.00E+00</b>  | <b>0.00E+00</b>  | 4.18  | (4.11-4.26)   | <b>0.00E+00</b>  | <b>0.00E+00</b>  | 0.28  | (0.14-0.43)   | <b>1.73E-04</b> | <b>3.46E-04</b> |
| 468 | PI | PI(36:2)           | -1.41 | (-1.46--1.36) | <b>0.00E+00</b>  | <b>0.00E+00</b>  | -5.19 | (-5.25--5.13) | <b>0.00E+00</b>  | <b>0.00E+00</b>  | 3.61  | (3.55-3.67)   | <b>0.00E+00</b>  | <b>0.00E+00</b>  | 0.20  | (0.09-0.31)   | <b>6.07E-04</b> | <b>1.12E-03</b> |
| 469 | PI | PI(18:1_18:2)      | -1.17 | (-1.23--1.12) | <b>7.59E-219</b> | <b>4.93E-218</b> | -2.99 | (-3.06--2.93) | <b>0.00E+00</b>  | <b>0.00E+00</b>  | 1.74  | (1.68-1.8)    | <b>0.00E+00</b>  | <b>0.00E+00</b>  | 0.26  | (0.13-0.4)    | <b>8.43E-05</b> | <b>1.78E-04</b> |
| 470 | PI | PI(16:0_20:3) (a)  | -1.44 | (-1.5--1.38)  | <b>1.12E-265</b> | <b>1.10E-264</b> | -1.94 | (-2--1.88)    | <b>0.00E+00</b>  | <b>0.00E+00</b>  | 0.70  | (0.65-0.75)   | <b>1.92E-110</b> | <b>3.33E-110</b> | -0.26 | (-0.39--0.13) | <b>1.27E-04</b> | <b>2.60E-04</b> |
| 471 | PI | PI(16:0_20:3) (b)  | -1.04 | (-1.11--0.97) | <b>3.19E-156</b> | <b>1.21E-155</b> | -0.72 | (-0.8--0.64)  | <b>1.03E-61</b>  | <b>1.19E-61</b>  | -0.13 | (-0.21--0.06) | <b>6.75E-04</b>  | <b>7.06E-04</b>  | -0.21 | (-0.35--0.07) | <b>2.83E-03</b> | <b>4.76E-03</b> |
| 472 | PI | PI(16:0_20:4)      | -1.05 | (-1.1--0.99)  | <b>3.13E-208</b> | <b>1.85E-207</b> | -1.11 | (-1.17--1.05) | <b>4.67E-214</b> | <b>7.05E-214</b> | 0.05  | (-0.01-0.1)   | 8.69E-02         | 8.88E-02         | -0.09 | (-0.21-0.03)  | 1.43E-01        | 1.78E-01        |
| 473 | PI | PI(18:0_20:2)      | -1.72 | (-1.79--1.66) | <b>0.00E+00</b>  | <b>0.00E+00</b>  | -3.34 | (-3.43--3.25) | <b>0.00E+00</b>  | <b>0.00E+00</b>  | 1.58  | (1.49-1.67)   | <b>2.93E-174</b> | <b>6.73E-174</b> | 0.15  | (0.01-0.29)   | <b>3.40E-02</b> | <b>4.76E-02</b> |
| 474 | PI | PI(18:0_20:3) (a)  | -0.52 | (-0.56--0.47) | <b>1.39E-93</b>  | <b>3.21E-93</b>  | -1.47 | (-1.52--1.42) | <b>0.00E+00</b>  | <b>0.00E+00</b>  | 0.80  | (0.75-0.85)   | <b>1.75E-168</b> | <b>3.85E-168</b> | 0.17  | (0.07-0.27)   | <b>5.16E-04</b> | <b>9.68E-04</b> |
| 475 | PI | PI(18:0_20:4)      | -0.48 | (-0.52--0.43) | <b>1.31E-81</b>  | <b>2.83E-81</b>  | -1.42 | (-1.47--1.38) | <b>0.00E+00</b>  | <b>0.00E+00</b>  | 0.78  | (0.73-0.82)   | <b>3.79E-168</b> | <b>8.26E-168</b> | 0.18  | (0.09-0.28)   | <b>2.11E-04</b> | <b>4.15E-04</b> |
| 476 | PI | PI(38:5) (a)       | -0.86 | (-0.91--0.81) | <b>9.79E-177</b> | <b>4.61E-176</b> | -0.73 | (-0.79--0.67) | <b>1.66E-105</b> | <b>2.02E-105</b> | -0.22 | (-0.27--0.16) | <b>3.82E-13</b>  | <b>4.24E-13</b>  | 0.11  | (0-0.22)      | <b>4.52E-02</b> | 6.17E-02        |
| 477 | PI | PI(38:6)           | -1.34 | (-1.4--1.28)  | <b>4.72E-257</b> | <b>4.12E-256</b> | -1.79 | (-1.85--1.73) | <b>0.00E+00</b>  | <b>0.00E+00</b>  | 0.50  | (0.44-0.55)   | <b>1.29E-57</b>  | <b>1.82E-57</b>  | 0.04  | (-0.09-0.17)  | 5.35E-01        | 5.98E-01        |
| 478 | PI | PI(18:0_22:4)      | -1.26 | (-1.32--1.2)  | <b>1.54E-250</b> | <b>1.27E-249</b> | -1.82 | (-1.88--1.75) | <b>0.00E+00</b>  | <b>0.00E+00</b>  | 0.57  | (0.51-0.63)   | <b>2.36E-68</b>  | <b>3.49E-68</b>  | -0.02 | (-0.14-0.11)  | 7.94E-01        | 8.31E-01        |
| 479 | PI | PI(18:0_22:5) (n3) | -0.46 | (-0.52--0.39) | <b>1.11E-45</b>  | <b>1.91E-45</b>  | -2.65 | (-2.73--2.58) | <b>0.00E+00</b>  | <b>0.00E+00</b>  | 1.88  | (1.81-1.95)   | <b>0.00E+00</b>  | <b>0.00E+00</b>  | 0.20  | (0.07-0.33)   | <b>1.95E-03</b> | <b>3.37E-03</b> |
| 480 | PI | PI(18:0_22:6)      | -1.29 | (-1.35--1.23) | <b>1.85E-243</b> | <b>1.44E-242</b> | -2.53 | (-2.6--2.47)  | <b>0.00E+00</b>  | <b>0.00E+00</b>  | 1.18  | (1.12-1.24)   | <b>1.69E-204</b> | <b>4.55E-204</b> | 0.10  | (-0.03-0.23)  | 1.33E-01        | 1.67E-01        |





















|     |                    |       |               |           |           |       |               |           |           |       |              |           |           |       |               |          |          |
|-----|--------------------|-------|---------------|-----------|-----------|-------|---------------|-----------|-----------|-------|--------------|-----------|-----------|-------|---------------|----------|----------|
| 455 | PE(P-20:0/18:2)    | -0.03 | (-0.09,0.02)  | 1.89E-01  | 1.99E-01  | -3.32 | (-3.37,-3.27) | 0.00E+00  | 0.00E+00  | 3.81  | (3.75,3.88)  | 1.39E-210 | 3.35E-208 | -0.56 | (-0.64,-0.49) | 1.20E-34 | 3.40E-33 |
| 456 | PE(P-20:0/20:4)    | 0.42  | (0.37,0.47)   | 2.15E-47  | 3.85E-47  | -1.58 | (-1.65,-1.51) | 4.76E-174 | 7.67E-174 | 2.41  | (2.32,2.49)  | 4.61E-135 | 4.34E-134 | -0.48 | (-0.55,-0.41) | 1.58E-30 | 2.30E-29 |
| 457 | PE(P-20:0/22:6)    | -0.11 | (-0.15,-0.06) | 2.84E-06  | 3.42E-06  | -1.92 | (-1.97,-1.88) | 1.89E-273 | 8.64E-273 | 1.96  | (1.89,2.04)  | 1.40E-129 | 1.10E-128 | -0.22 | (-0.29,-0.16) | 1.93E-10 | 4.64E-10 |
| 458 | PE(P-20:1/20:4)    | 0.36  | (0.27,0.44)   | 2.73E-15  | 3.63E-15  | -2.81 | (-2.9,-2.72)  | 1.74E-218 | 3.96E-218 | 3.02  | (2.89,3.15)  | 2.77E-119 | 1.58E-118 | 0.08  | (-0.04,0.2)   | 1.87E-01 | 2.05E-01 |
| 459 | PG(34:2)           | -1.24 | (-1.33,-1.15) | 9.59E-91  | 3.44E-90  | -2.54 | (-2.64,-2.44) | 1.70E-188 | 2.96E-188 | 0.95  | (0.79,1.11)  | 7.98E-26  | 1.08E-25  | 0.24  | (0.13,0.36)   | 5.65E-05 | 8.45E-05 |
| 460 | PG(36:1)           | -0.89 | (-0.98,-0.81) | 3.85E-69  | 9.07E-69  | -2.47 | (-2.56,-2.38) | 4.18E-193 | 7.48E-193 | 1.35  | (1.2,1.5)    | 3.14E-45  | 5.17E-45  | 0.36  | (0.24,0.48)   | 6.49E-09 | 1.35E-08 |
| 461 | PI(16:0/16:0)      | -3.06 | (-3.17,-2.95) | 2.26E-178 | 9.04E-177 | -4.54 | (-4.63,-4.45) | 1.75E-302 | 1.72E-301 | 1.18  | (1.06,1.3)   | 1.35E-51  | 2.39E-51  | 0.27  | (0.15,0.39)   | 1.33E-05 | 2.07E-05 |
| 462 | PI(16:0_16:1)      | -1.93 | (-2.05,-1.82) | 1.48E-110 | 8.35E-110 | -2.60 | (-2.69,-2.51) | 3.80E-204 | 7.35E-204 | 0.54  | (0.43,0.66)  | 5.15E-17  | 6.44E-17  | 0.12  | (-0.01,0.25)  | 6.18E-02 | 7.04E-02 |
| 463 | PI(34:0)           | -3.14 | (-3.25,-3.02) | 8.72E-183 | 4.19E-181 | -5.20 | (-5.31,-5.09) | 3.49E-294 | 2.66E-293 | 1.64  | (1.48,1.8)   | 1.21E-54  | 2.20E-54  | 0.46  | (0.33,0.59)   | 8.51E-12 | 2.28E-11 |
| 464 | PI(34:1)           | -1.65 | (-1.73,-1.58) | 4.07E-154 | 5.75E-153 | -4.29 | (-4.35,-4.23) | 0.00E+00  | 0.00E+00  | 2.58  | (2.5,2.66)   | 2.55E-148 | 3.23E-147 | 0.08  | (0,0.17)      | 5.67E-02 | 6.50E-02 |
| 465 | PI(17:0_18:1)      | -1.46 | (-1.53,-1.39) | 4.85E-144 | 5.54E-143 | -4.11 | (-4.18,-4.03) | 0.00E+00  | 0.00E+00  | 2.63  | (2.52,2.74)  | 4.63E-123 | 2.92E-122 | 0.10  | (0.01,0.19)   | 2.31E-02 | 2.75E-02 |
| 466 | PI(17:0_18:2)      | -1.45 | (-1.52,-1.38) | 3.58E-143 | 4.00E-142 | -4.27 | (-4.36,-4.19) | 2.73E-300 | 2.52E-299 | 2.65  | (2.51,2.79)  | 3.96E-101 | 1.53E-100 | 0.23  | (0.14,0.33)   | 1.18E-06 | 2.04E-06 |
| 467 | PI(18:0_18:1)      | -1.70 | (-1.77,-1.62) | 3.29E-157 | 5.26E-156 | -5.98 | (-6.04,-5.91) | 0.00E+00  | 0.00E+00  | 4.17  | (4.08,4.26)  | 3.36E-187 | 2.02E-185 | 0.16  | (0.07,0.25)   | 9.65E-04 | 1.30E-03 |
| 468 | PI(36:2)           | -1.43 | (-1.48,-1.37) | 3.39E-171 | 9.03E-170 | -5.15 | (-5.21,-5.1)  | 0.00E+00  | 0.00E+00  | 3.61  | (3.54,3.68)  | 2.26E-193 | 2.72E-191 | 0.13  | (0.06,0.2)    | 1.70E-04 | 2.45E-04 |
| 469 | PI(18:1_18:2)      | -1.18 | (-1.25,-1.12) | 3.68E-127 | 2.87E-126 | -2.96 | (-3.01,-2.9)  | 0.00E+00  | 0.00E+00  | 1.74  | (1.66,1.82)  | 1.37E-111 | 6.52E-111 | 0.03  | (-0.06,0.12)  | 4.74E-01 | 5.01E-01 |
| 470 | PI(16:0_20:3) (a)  | -1.43 | (-1.5,-1.36)  | 1.50E-133 | 1.31E-132 | -1.96 | (-2.01,-1.9)  | 2.67E-242 | 8.39E-242 | 0.70  | (0.63,0.78)  | 1.61E-49  | 2.80E-49  | -0.19 | (-0.27,-0.11) | 8.10E-06 | 1.30E-05 |
| 471 | PI(16:0_20:3) (b)  | -1.09 | (-1.17,-1.01) | 7.08E-89  | 2.31E-88  | -0.75 | (-0.84,-0.66) | 4.59E-50  | 5.27E-50  | -0.09 | (-0.19,0.01) | 7.36E-02  | 7.60E-02  | -0.18 | (-0.27,-0.09) | 6.33E-05 | 9.37E-05 |
| 472 | PI(16:0_20:4)      | -1.06 | (-1.12,-0.99) | 2.63E-110 | 1.47E-109 | -1.09 | (-1.15,-1.04) | 5.57E-152 | 8.27E-152 | 0.03  | (-0.05,0.1)  | 5.05E-01  | 5.09E-01  | -0.02 | (-0.09,0.06)  | 6.35E-01 | 6.54E-01 |
| 473 | PI(18:0_20:2)      | -1.67 | (-1.74,-1.61) | 1.81E-161 | 3.35E-160 | -3.33 | (-3.42,-3.25) | 1.13E-261 | 4.23E-261 | 1.53  | (1.42,1.63)  | 3.18E-79  | 8.26E-79  | 0.14  | (0.05,0.22)   | 1.44E-03 | 1.90E-03 |
| 474 | PI(18:0_20:3) (a)  | -0.52 | (-0.56,-0.47) | 3.13E-75  | 8.17E-75  | -1.46 | (-1.5,-1.42)  | 7.88E-228 | 2.03E-227 | 0.79  | (0.73,0.85)  | 1.81E-69  | 3.91E-69  | 0.13  | (0.07,0.19)   | 4.46E-05 | 6.71E-05 |
| 475 | PI(18:0_20:4)      | -0.48 | (-0.53,-0.44) | 1.32E-69  | 3.12E-69  | -1.41 | (-1.46,-1.37) | 5.39E-223 | 1.28E-222 | 0.77  | (0.7,0.83)   | 4.73E-64  | 9.39E-64  | 0.15  | (0.09,0.21)   | 1.86E-06 | 3.16E-06 |
| 476 | PI(38:5) (a)       | -0.86 | (-0.92,-0.8)  | 2.64E-99  | 1.11E-98  | -0.66 | (-0.72,-0.61) | 1.44E-77  | 1.70E-77  | -0.22 | (-0.3,-0.14) | 2.67E-07  | 3.00E-07  | 0.02  | (-0.05,0.09)  | 5.65E-01 | 5.90E-01 |
| 477 | PI(38:6)           | -1.36 | (-1.42,-1.29) | 4.66E-146 | 5.59E-145 | -1.79 | (-1.84,-1.73) | 5.06E-235 | 1.41E-234 | 0.47  | (0.39,0.54)  | 7.90E-29  | 1.12E-28  | -0.10 | (-0.18,-0.02) | 1.04E-02 | 1.29E-02 |
| 478 | PI(18:0_22:4)      | -1.24 | (-1.3,-1.18)  | 1.08E-133 | 9.62E-133 | -1.83 | (-1.89,-1.77) | 6.13E-214 | 1.33E-213 | 0.59  | (0.5,0.67)   | 1.12E-31  | 1.63E-31  | -0.02 | (-0.09,0.05)  | 5.92E-01 | 6.15E-01 |
| 479 | PI(18:0_22:5) (n3) | -0.49 | (-0.55,-0.43) | 6.84E-42  | 1.15E-41  | -2.63 | (-2.69,-2.57) | 1.69E-283 | 9.45E-283 | 1.86  | (1.77,1.95)  | 3.94E-111 | 1.84E-110 | 0.26  | (0.18,0.34)   | 4.18E-10 | 9.64E-10 |
| 480 | PI(18:0_22:6)      | -1.31 | (-1.37,-1.25) | 1.88E-147 | 2.37E-146 | -2.50 | (-2.55,-2.45) | 0.00E+00  | 0.00E+00  | 1.18  | (1.1,1.25)   | 1.45E-82  | 3.98E-82  | 0.02  | (-0.05,0.1)   | 5.51E-01 | 5.79E-01 |



**Table S2A.** Association of lipid classes with BMI or BW in four sample groups (antenatal, postnatal, cord blood and 6-year-old child) in terms of levels. Related to Figure 2.

| Lipid Class | ppBMI (antenatal)<br>adjusted for ethnicity, maternal age, maternal education level and gestational weight gain at 26-28 weeks of gestation |               |                 |                 | Adult BMI (postnatal)<br>adjusted for ethnicity, maternal age and maternal education level |               |                 |                 | Birth Weight (cord blood)<br>adjusted for sex, ethnicity, maternal age, maternal education level, pre-pregnancy BMI, total gestational weight gain, gestational age and parity |               |                 |                 | Child BMI (6-year-old)<br>adjusted for sex, ethnicity and maternal education level |               |                 |                 |
|-------------|---------------------------------------------------------------------------------------------------------------------------------------------|---------------|-----------------|-----------------|--------------------------------------------------------------------------------------------|---------------|-----------------|-----------------|--------------------------------------------------------------------------------------------------------------------------------------------------------------------------------|---------------|-----------------|-----------------|------------------------------------------------------------------------------------|---------------|-----------------|-----------------|
|             | %change in lipid concentration per unit BMI                                                                                                 | 95%CI         | p-value         | p-value(BH)     | %change in lipid concentration per unit BMI                                                | 95%CI         | p-value         | p-value(BH)     | %change in lipid concentration per 100 grams                                                                                                                                   | 95%CI         | p-value         | p-value(BH)     | %change in lipid concentration per unit BMI                                        | 95%CI         | p-value         | p-value(BH)     |
| AC          | 0.81                                                                                                                                        | (0.18-1.44)   | <b>1.13E-02</b> | <b>1.76E-02</b> | -0.24                                                                                      | (-0.72-0.25)  | 3.38E-01        | 3.84E-01        | -0.62                                                                                                                                                                          | (-1.14--0.06) | <b>3.00E-02</b> | 6.26E-02        | -1.00                                                                              | (-2.51-0.54)  | 2.00E-01        | 3.84E-01        |
| CE          | -0.93                                                                                                                                       | (-1.26--0.6)  | <b>4.94E-08</b> | <b>2.29E-07</b> | -0.43                                                                                      | (-0.71--0.14) | <b>3.26E-03</b> | <b>4.80E-03</b> | -0.30                                                                                                                                                                          | (-0.74-0.17)  | 2.06E-01        | 2.86E-01        | 0.54                                                                               | (-0.38-1.47)  | 2.50E-01        | 4.47E-01        |
| DG          | 1.12                                                                                                                                        | (0.48-1.76)   | <b>5.79E-04</b> | <b>1.45E-03</b> | 3.05                                                                                       | (2.26-3.85)   | <b>8.01E-14</b> | <b>1.00E-12</b> | -2.21                                                                                                                                                                          | (-2.77--1.61) | <b>9.98E-11</b> | <b>4.99E-10</b> | 2.83                                                                               | (0.69-5.03)   | <b>9.66E-03</b> | 6.04E-02        |
| TG          | 0.59                                                                                                                                        | (0.15-1.04)   | <b>8.50E-03</b> | <b>1.63E-02</b> | 2.95                                                                                       | (2.24-3.66)   | <b>8.03E-16</b> | <b>2.01E-14</b> | -3.26                                                                                                                                                                          | (-3.92--2.53) | <b>2.12E-13</b> | <b>1.76E-12</b> | 3.62                                                                               | (1.61-5.67)   | <b>4.09E-04</b> | <b>1.02E-02</b> |
| TG(O)       | 0.44                                                                                                                                        | (-0.14-1.02)  | 1.35E-01        | 1.53E-01        | 2.88                                                                                       | (2.09-3.67)   | <b>1.48E-12</b> | <b>1.24E-11</b> | -2.74                                                                                                                                                                          | (-3.37--2.05) | <b>9.36E-12</b> | <b>5.85E-11</b> | 3.05                                                                               | (0.82-5.32)   | <b>7.22E-03</b> | 6.01E-02        |
| dhCer       | 0.99                                                                                                                                        | (0.41- 1.57)  | <b>7.81E-04</b> | <b>1.63E-03</b> | 1.42                                                                                       | (0.85- 1.99)  | <b>9.62E-07</b> | <b>2.67E-06</b> | -0.32                                                                                                                                                                          | (-0.95- 0.35) | 3.35E-01        | 4.22E-01        | 0.80                                                                               | (-0.77- 2.39) | 3.18E-01        | 5.29E-01        |
| Cer         | -0.56                                                                                                                                       | (-0.99--0.13) | <b>1.10E-02</b> | <b>1.76E-02</b> | 0.22                                                                                       | (-0.22- 0.66) | 3.19E-01        | 3.80E-01        | -0.41                                                                                                                                                                          | (-0.95- 0.16) | 1.54E-01        | 2.57E-01        | 0.41                                                                               | (-0.83- 1.68) | 5.16E-01        | 6.79E-01        |
| DeoxyCer    | 0.31                                                                                                                                        | (-0.43-1.05)  | 4.14E-01        | 4.50E-01        | 2.50                                                                                       | (1.79-3.21)   | <b>5.39E-12</b> | <b>3.37E-11</b> | -2.12                                                                                                                                                                          | (-2.66--1.54) | <b>1.22E-10</b> | <b>5.10E-10</b> | 1.65                                                                               | (-0.04-3.36)  | 5.57E-02        | 1.76E-01        |
| GM3         | -1.98                                                                                                                                       | (-2.5--1.47)  | <b>1.59E-13</b> | <b>1.98E-12</b> | -0.89                                                                                      | (-1.36--0.42) | <b>2.46E-04</b> | <b>4.38E-04</b> | -0.34                                                                                                                                                                          | (-1.01-0.37)  | 3.37E-01        | 4.22E-01        | -1.46                                                                              | (-2.71--0.19) | <b>2.41E-02</b> | 1.20E-01        |
| HexCer      | -1.86                                                                                                                                       | (-2.32--1.4)  | <b>1.61E-14</b> | <b>4.03E-13</b> | -0.90                                                                                      | (-1.35--0.45) | <b>9.66E-05</b> | <b>2.01E-04</b> | 0.19                                                                                                                                                                           | (-0.53-0.97)  | 6.16E-01        | 7.33E-01        | -1.81                                                                              | (-3.09--0.5)  | <b>6.98E-03</b> | 6.01E-02        |
| Hex2Cer     | -1.53                                                                                                                                       | (-2.04--1.02) | <b>6.86E-09</b> | <b>4.29E-08</b> | -1.16                                                                                      | (-1.67--0.64) | <b>1.49E-05</b> | <b>3.72E-05</b> | -0.46                                                                                                                                                                          | (-1.12-0.25)  | 1.95E-01        | 2.86E-01        | -1.46                                                                              | (-3.09-0.21)  | 8.61E-02        | 2.39E-01        |
| Hex3Cer     | -1.17                                                                                                                                       | (-1.58--0.75) | <b>5.51E-08</b> | <b>2.29E-07</b> | -1.34                                                                                      | (-1.74--0.94) | <b>1.52E-10</b> | <b>7.60E-10</b> | -0.44                                                                                                                                                                          | (-1.02-0.19)  | 1.65E-01        | 2.57E-01        | -1.20                                                                              | (-2.32--0.07) | <b>3.69E-02</b> | 1.54E-01        |
| SM          | -1.04                                                                                                                                       | (-1.49--0.58) | <b>1.18E-05</b> | <b>3.70E-05</b> | -0.32                                                                                      | (-0.75-0.13)  | 1.60E-01        | 2.00E-01        | -0.10                                                                                                                                                                          | (-0.63-0.46)  | 7.17E-01        | 7.79E-01        | -0.58                                                                              | (-1.78-0.65)  | 3.53E-01        | 5.51E-01        |
| LPC         | 0.07                                                                                                                                        | (-0.4-0.55)   | 7.62E-01        | 7.62E-01        | -0.91                                                                                      | (-1.38--0.45) | <b>1.28E-04</b> | <b>2.45E-04</b> | 2.25                                                                                                                                                                           | (1.73-2.79)   | <b>8.80E-19</b> | <b>1.10E-17</b> | 0.24                                                                               | (-1.48-1.98)  | 7.88E-01        | 8.56E-01        |
| LPC(O)      | -0.87                                                                                                                                       | (-1.26--0.47) | <b>1.96E-05</b> | <b>5.44E-05</b> | -1.15                                                                                      | (-1.56--0.74) | <b>6.12E-08</b> | <b>2.55E-07</b> | 1.31                                                                                                                                                                           | (0.86-1.77)   | <b>2.73E-09</b> | <b>8.53E-09</b> | -0.45                                                                              | (-2.04-1.17)  | 5.83E-01        | 6.94E-01        |
| LPC(P)      | 0.40                                                                                                                                        | (-0.04-0.83)  | 7.32E-02        | 9.64E-02        | -0.92                                                                                      | (-1.36--0.48) | <b>4.97E-05</b> | <b>1.13E-04</b> | 1.47                                                                                                                                                                           | (1-1.96)      | <b>1.85E-10</b> | <b>6.62E-10</b> | -0.14                                                                              | (-1.84-1.59)  | 8.71E-01        | 8.77E-01        |
| LPE         | -0.37                                                                                                                                       | (-0.81-0.07)  | 1.01E-01        | 1.20E-01        | -0.79                                                                                      | (-1.28--0.31) | <b>1.45E-03</b> | <b>2.26E-03</b> | 2.55                                                                                                                                                                           | (1.99-3.13)   | <b>4.07E-21</b> | <b>1.02E-19</b> | -1.18                                                                              | (-2.61-0.27)  | 1.09E-01        | 2.74E-01        |
| PC          | -0.62                                                                                                                                       | (-0.98--0.26) | <b>7.21E-04</b> | <b>1.63E-03</b> | -0.08                                                                                      | (-0.49-0.33)  | 7.04E-01        | 7.33E-01        | -0.53                                                                                                                                                                          | (-1.03-0)     | 5.04E-02        | 9.01E-02        | -0.34                                                                              | (-1.52-0.85)  | 5.70E-01        | 6.94E-01        |
| PC(O)       | -0.61                                                                                                                                       | (-1.09--0.14) | <b>1.13E-02</b> | <b>1.76E-02</b> | -0.71                                                                                      | (-1.18--0.23) | <b>3.52E-03</b> | <b>4.88E-03</b> | -0.11                                                                                                                                                                          | (-0.68-0.49)  | 7.15E-01        | 7.79E-01        | -0.23                                                                              | (-1.57-1.12)  | 7.36E-01        | 8.36E-01        |
| PC(P)       | -0.49                                                                                                                                       | (-1.03-0.05)  | 7.27E-02        | 9.64E-02        | -1.25                                                                                      | (-1.74--0.76) | <b>6.73E-07</b> | <b>2.10E-06</b> | -0.92                                                                                                                                                                          | (-1.45--0.35) | <b>1.83E-03</b> | <b>5.07E-03</b> | -0.61                                                                              | (-2.02-0.81)  | 3.96E-01        | 5.82E-01        |
| PE          | 0.15                                                                                                                                        | (-0.5-0.8)    | 6.49E-01        | 6.76E-01        | 0.30                                                                                       | (-0.51-1.12)  | 4.64E-01        | 5.04E-01        | -0.91                                                                                                                                                                          | (-1.47--0.31) | <b>3.63E-03</b> | <b>9.09E-03</b> | 0.18                                                                               | (-2.07-2.48)  | 8.77E-01        | 8.77E-01        |
| PE(O)       | -1.47                                                                                                                                       | (-2.09--0.85) | <b>4.80E-06</b> | <b>1.72E-05</b> | -1.22                                                                                      | (-1.87--0.57) | <b>2.76E-04</b> | <b>4.60E-04</b> | -0.06                                                                                                                                                                          | (-0.65-0.58)  | 8.60E-01        | 8.96E-01        | 0.69                                                                               | (-1.14-2.56)  | 4.60E-01        | 6.40E-01        |
| PE(P)       | -0.54                                                                                                                                       | (-1.11-0.05)  | 7.07E-02        | 9.64E-02        | -0.54                                                                                      | (-1.11-0.03)  | 6.24E-02        | 8.21E-02        | -0.04                                                                                                                                                                          | (-0.63-0.59)  | 9.00E-01        | 9.00E-01        | 1.24                                                                               | (-0.35-2.85)  | 1.28E-01        | 2.90E-01        |
| PG          | -0.51                                                                                                                                       | (-1.09-0.07)  | 8.44E-02        | 1.06E-01        | 2.08                                                                                       | (1.27-2.89)   | <b>4.82E-07</b> | <b>1.72E-06</b> | -1.00                                                                                                                                                                          | (-1.87--0.04) | <b>4.14E-02</b> | 7.96E-02        | 2.23                                                                               | (-0.06-4.58)  | 5.64E-02        | 1.76E-01        |
| PI          | -1.59                                                                                                                                       | (-2.07--1.1)  | <b>2.95E-10</b> | <b>2.46E-09</b> | -0.07                                                                                      | (-0.56-0.42)  | 7.73E-01        | 7.73E-01        | -0.47                                                                                                                                                                          | (-0.87--0.05) | <b>2.97E-02</b> | 6.26E-02        | -0.85                                                                              | (-2.1-0.41)   | 1.85E-01        | 3.84E-01        |

















|     |                     |       |               |                 |                 |       |               |                 |                 |       |               |                 |                 |       |               |                 |                 |
|-----|---------------------|-------|---------------|-----------------|-----------------|-------|---------------|-----------------|-----------------|-------|---------------|-----------------|-----------------|-------|---------------|-----------------|-----------------|
| 330 | PC(18:2_20:5)       | -1.76 | (-2.73--0.78) | <b>4.83E-04</b> | <b>1.32E-03</b> | -0.89 | (-1.88-0.12)  | 8.29E-02        | 1.15E-01        | -0.64 | (-1.41-0.21)  | 1.36E-01        | 2.09E-01        | 2.51  | (-0.16-5.25)  | 6.60E-02        | 1.52E-01        |
| 331 | PC(16:1_22:6)       | -1.64 | (-2.33--0.96) | <b>3.49E-06</b> | <b>1.54E-05</b> | -0.66 | (-1.32-0.01)  | 5.51E-02        | 7.89E-02        | -1.04 | (-1.56--0.48) | <b>4.09E-04</b> | <b>1.06E-03</b> | 1.62  | (-0.35-3.62)  | 1.08E-01        | 2.12E-01        |
| 332 | PC(38:7)(c)         | -1.58 | (-2.17--0.99) | <b>2.34E-07</b> | <b>1.32E-06</b> | -0.64 | (-1.21--0.06) | <b>2.93E-02</b> | <b>4.47E-02</b> | -0.88 | (-1.37--0.37) | <b>1.02E-03</b> | <b>2.45E-03</b> | -0.03 | (-1.69-1.66)  | 9.73E-01        | 9.88E-01        |
| 333 | PC(39:5)(a)         | -2.53 | (-3.35--1.7)  | <b>4.56E-09</b> | <b>3.53E-08</b> | -1.82 | (-2.59--1.05) | <b>4.96E-06</b> | <b>1.51E-05</b> | -1.98 | (-2.62--1.29) | <b>2.49E-07</b> | <b>9.28E-07</b> | -0.54 | (-2.96-1.95)  | 6.68E-01        | 7.58E-01        |
| 334 | PC(39:5)(b)         | -2.31 | (-3.04--1.58) | <b>1.68E-09</b> | <b>1.56E-08</b> | -0.86 | (-1.58--0.13) | <b>2.03E-02</b> | <b>3.21E-02</b> | -1.95 | (-2.55--1.29) | <b>7.31E-08</b> | <b>2.90E-07</b> | -0.94 | (-3.24-1.42)  | 4.31E-01        | 5.75E-01        |
| 335 | PC(15-MHDA_22:6)    | -2.51 | (-3.31--1.7)  | <b>2.77E-09</b> | <b>2.33E-08</b> | -1.62 | (-2.33--0.91) | <b>1.10E-05</b> | <b>3.17E-05</b> | -2.07 | (-2.73--1.36) | <b>1.67E-07</b> | <b>6.31E-07</b> | -1.16 | (-3.44-1.17)  | 3.25E-01        | 4.86E-01        |
| 336 | PC(17:0_22:6)       | -2.00 | (-2.74--1.26) | <b>1.87E-07</b> | <b>1.08E-06</b> | -1.05 | (-1.79--0.31) | <b>5.44E-03</b> | <b>9.82E-03</b> | -2.24 | (-2.78--1.65) | <b>1.65E-11</b> | <b>9.21E-11</b> | -0.48 | (-2.73-1.83)  | 6.82E-01        | 7.69E-01        |
| 337 | PC(18:0_22:5) (n6)  | -1.32 | (-2.07--0.57) | <b>6.32E-04</b> | <b>1.67E-03</b> | 1.17  | (0.37-1.97)   | <b>3.94E-03</b> | <b>7.42E-03</b> | -1.24 | (-2.36-0.06)  | 6.01E-02        | 1.04E-01        | 2.25  | (0.3-4.25)    | <b>2.39E-02</b> | 7.17E-02        |
| 338 | PC(18:0_22:6)       | -0.61 | (-1.32-0.1)   | 9.21E-02        | 1.30E-01        | 1.19  | (0.44-1.95)   | <b>1.98E-03</b> | <b>3.94E-03</b> | -1.44 | (-2.09--0.74) | <b>1.21E-04</b> | <b>3.40E-04</b> | 3.01  | (0.9-5.18)    | <b>5.22E-03</b> | <b>2.12E-02</b> |
| 339 | PC(40:7) (a)        | -1.36 | (-1.99--0.73) | <b>2.64E-05</b> | <b>9.76E-05</b> | 0.02  | (-0.65-0.69)  | 9.56E-01        | 9.69E-01        | 0.94  | (0-1.97)      | <b>4.91E-02</b> | 8.72E-02        | 1.35  | (-0.64-3.39)  | 1.84E-01        | 3.18E-01        |
| 340 | PC(18:1_22:6) (a)   | -1.70 | (-2.24--1.16) | <b>1.69E-09</b> | <b>1.56E-08</b> | -0.86 | (-1.44--0.27) | <b>4.10E-03</b> | <b>7.62E-03</b> | -0.45 | (-1.13-0.27)  | 2.15E-01        | 3.04E-01        | -1.64 | (-3.29-0.03)  | 5.37E-02        | 1.31E-01        |
| 341 | PC(40:8)            | -1.77 | (-2.3--1.24)  | <b>1.86E-10</b> | <b>2.70E-09</b> | -1.88 | (-2.39--1.37) | <b>2.15E-12</b> | <b>1.91E-11</b> | 0.83  | (0.2-1.5)     | <b>9.19E-03</b> | <b>1.92E-02</b> | -0.97 | (-2.47-0.55)  | 2.09E-01        | 3.48E-01        |
| 342 | PC(44:12)           | -2.40 | (-3.44--1.34) | <b>1.14E-05</b> | <b>4.60E-05</b> | -2.61 | (-3.74--1.46) | <b>1.06E-05</b> | <b>3.09E-05</b> | -1.02 | (-1.76--0.22) | <b>1.39E-02</b> | <b>2.75E-02</b> | -0.64 | (-3.66-2.47)  | 6.82E-01        | 7.69E-01        |
| 343 | PC(O-16:0/16:0)     | -0.78 | (-1.21--0.35) | <b>3.82E-04</b> | <b>1.09E-03</b> | -0.75 | (-1.18--0.33) | <b>5.02E-04</b> | <b>1.13E-03</b> | 0.45  | (-0.19-1.14)  | 1.70E-01        | 2.52E-01        | -1.08 | (-2.23-0.07)  | 6.58E-02        | 1.52E-01        |
| 344 | PC(O-32:1)          | -1.01 | (-1.56--0.45) | <b>4.20E-04</b> | <b>1.18E-03</b> | -0.53 | (-1.07-0.02)  | 5.89E-02        | 8.34E-02        | 0.73  | (0-1.52)      | 5.05E-02        | 8.95E-02        | -0.34 | (-1.82-1.16)  | 6.50E-01        | 7.50E-01        |
| 345 | PC(O-34:1)          | -0.84 | (-1.27--0.41) | <b>1.54E-04</b> | <b>4.84E-04</b> | -1.21 | (-1.62--0.79) | <b>2.44E-08</b> | <b>1.08E-07</b> | 0.68  | (0.02-1.38)   | <b>4.18E-02</b> | 7.52E-02        | -2.24 | (-3.3--1.18)  | <b>4.84E-05</b> | <b>7.04E-04</b> |
| 346 | PC(O-34:2)          | -2.02 | (-2.62--1.41) | <b>2.10E-10</b> | <b>2.80E-09</b> | -1.75 | (-2.35--1.15) | <b>2.36E-08</b> | <b>1.05E-07</b> | -0.06 | (-0.77-0.69)  | 8.63E-01        | 9.01E-01        | -1.81 | (-3.58-0)     | <b>4.98E-02</b> | 1.24E-01        |
| 347 | PC(O-34:4)          | -0.88 | (-1.84-0.1)   | 7.86E-02        | 1.13E-01        | -0.61 | (-1.64-0.42)  | 2.46E-01        | 3.02E-01        | -0.01 | (-0.7-0.73)   | 9.69E-01        | 9.77E-01        | 1.29  | (-1.45-4.11)  | 3.58E-01        | 5.10E-01        |
| 348 | PC(O-35:4)          | -0.89 | (-1.73--0.04) | <b>4.09E-02</b> | 6.65E-02        | -0.70 | (-1.63-0.24)  | 1.44E-01        | 1.86E-01        | -0.49 | (-1.13-0.19)  | 1.52E-01        | 2.29E-01        | 0.45  | (-2.21-3.19)  | 7.41E-01        | 8.21E-01        |
| 349 | PC(O-36:0)          | -1.30 | (-1.8--0.81)  | <b>3.88E-07</b> | <b>2.12E-06</b> | -0.84 | (-1.33--0.35) | <b>9.07E-04</b> | <b>1.95E-03</b> | 0.14  | (-0.67-1.02)  | 7.52E-01        | 8.24E-01        | -2.41 | (-3.76--1.03) | <b>6.74E-04</b> | <b>4.23E-03</b> |
| 350 | PC(O-18:0/18:1)     | -1.51 | (-1.98--1.03) | <b>1.00E-09</b> | <b>1.02E-08</b> | -1.48 | (-1.92--1.04) | <b>1.07E-10</b> | <b>6.87E-10</b> | 1.31  | (0.62-2.05)   | <b>1.35E-04</b> | <b>3.71E-04</b> | -3.04 | (-4.22--1.85) | <b>1.05E-06</b> | <b>3.88E-05</b> |
| 351 | PC(O-18:1/18:1)     | -1.20 | (-1.66--0.74) | <b>4.16E-07</b> | <b>2.24E-06</b> | -1.71 | (-2.13--1.29) | <b>1.10E-14</b> | <b>1.42E-13</b> | 0.71  | (0.11-1.35)   | <b>2.01E-02</b> | <b>3.86E-02</b> | -1.86 | (-2.95--0.75) | <b>1.12E-03</b> | <b>6.20E-03</b> |
| 352 | PC(O-18:0/18:2)     | -2.36 | (-2.92--1.79) | <b>3.60E-15</b> | <b>1.73E-13</b> | -1.89 | (-2.38--1.39) | <b>4.43E-13</b> | <b>4.43E-12</b> | 0.44  | (-0.18-1.11)  | 1.67E-01        | 2.51E-01        | -2.63 | (-4.12--1.12) | <b>7.48E-04</b> | <b>4.54E-03</b> |
| 353 | PC(O-18:1/18:2)     | -1.41 | (-1.96--0.86) | <b>7.43E-07</b> | <b>3.71E-06</b> | -1.34 | (-1.85--0.82) | <b>6.84E-07</b> | <b>2.35E-06</b> | -0.06 | (-0.7-0.63)   | 8.59E-01        | 9.01E-01        | -1.45 | (-2.94-0.06)  | 5.92E-02        | 1.43E-01        |
| 354 | PC(O-16:0/20:3)     | -0.51 | (-1.03-0.02)  | 6.07E-02        | 9.23E-02        | 0.21  | (-0.32-0.76)  | 4.34E-01        | 4.92E-01        | 0.39  | (-0.29-1.12)  | 2.68E-01        | 3.62E-01        | 0.94  | (-0.55-2.45)  | 2.17E-01        | 3.61E-01        |
| 355 | PC(O-16:0/20:4)     | -0.15 | (-0.68-0.38)  | 5.74E-01        | 6.26E-01        | -0.43 | (-0.95-0.09)  | 1.04E-01        | 1.39E-01        | -0.15 | (-0.73-0.46)  | 6.14E-01        | 6.98E-01        | 0.53  | (-0.97-2.05)  | 4.89E-01        | 6.31E-01        |
| 356 | PC(O-36:5)          | -1.11 | (-2.09--0.12) | <b>2.87E-02</b> | <b>4.82E-02</b> | -0.38 | (-1.4-0.66)   | 4.72E-01        | 5.31E-01        | -1.06 | (-1.73--0.34) | <b>4.52E-03</b> | <b>9.91E-03</b> | 2.54  | (-0.25-5.41)  | 7.43E-02        | 1.63E-01        |
| 357 | PC(O-18:0/20:4)     | -0.40 | (-0.91-0.12)  | 1.28E-01        | 1.76E-01        | -0.72 | (-1.18--0.24) | <b>3.06E-03</b> | <b>5.83E-03</b> | -0.31 | (-0.85-0.26)  | 2.75E-01        | 3.66E-01        | -1.33 | (-2.77-0.14)  | 7.48E-02        | 1.63E-01        |
| 358 | PC(O-38:5)          | -0.01 | (-0.47-0.46)  | 9.81E-01        | 9.83E-01        | -0.63 | (-1.12--0.13) | <b>1.31E-02</b> | <b>2.16E-02</b> | -0.16 | (-0.83-0.55)  | 6.44E-01        | 7.28E-01        | 0.05  | (-1.34-1.45)  | 9.46E-01        | 9.76E-01        |
| 359 | PC(O-16:0/22:6)     | -0.23 | (-0.91-0.45)  | 5.00E-01        | 5.53E-01        | -0.30 | (-1-0.4)      | 3.99E-01        | 4.55E-01        | -0.81 | (-1.4--0.17)  | <b>1.38E-02</b> | <b>2.75E-02</b> | 1.12  | (-0.78-3.07)  | 2.49E-01        | 4.02E-01        |
| 360 | PC(O-40:5)          | -0.80 | (-1.3--0.3)   | <b>1.67E-03</b> | <b>3.98E-03</b> | -0.88 | (-1.34--0.42) | <b>1.90E-04</b> | <b>4.60E-04</b> | -0.16 | (-0.68-0.39)  | 5.65E-01        | 6.53E-01        | -0.79 | (-2.12-0.56)  | 2.48E-01        | 4.01E-01        |
| 361 | PC(O-18:0/22:6)     | -0.69 | (-1.25--0.12) | <b>1.77E-02</b> | <b>3.15E-02</b> | -1.09 | (-1.63--0.55) | <b>9.15E-05</b> | <b>2.31E-04</b> | -0.93 | (-1.43--0.39) | <b>9.93E-04</b> | <b>2.41E-03</b> | -1.23 | (-2.72-0.29)  | 1.11E-01        | 2.14E-01        |
| 362 | PC(O-40:7) (a)      | -0.06 | (-0.71-0.59)  | 8.54E-01        | 8.76E-01        | -0.80 | (-1.41--0.18) | <b>1.10E-02</b> | <b>1.83E-02</b> | -0.71 | (-1.28--0.11) | <b>2.17E-02</b> | <b>4.11E-02</b> | -0.07 | (-1.89-1.79)  | 9.42E-01        | 9.74E-01        |
| 363 | PC(P-16:0/14:0)     | -1.27 | (-1.86--0.68) | <b>2.71E-05</b> | <b>9.86E-05</b> | -1.18 | (-1.79--0.56) | <b>1.98E-04</b> | <b>4.77E-04</b> | -0.35 | (-1.06-0.41)  | 3.52E-01        | 4.52E-01        | -0.01 | (-1.86-1.89)  | 9.95E-01        | 9.99E-01        |
| 364 | PC(P-16:0/16:0)     | -0.71 | (-1.21--0.2)  | <b>6.69E-03</b> | <b>1.37E-02</b> | -1.03 | (-1.54--0.53) | <b>6.60E-05</b> | <b>1.72E-04</b> | -0.52 | (-1.15-0.16)  | 1.33E-01        | 2.06E-01        | -1.25 | (-2.56-0.08)  | 6.48E-02        | 1.50E-01        |
| 365 | PC(P-16:0/16:1)     | -0.71 | (-1.31--0.11) | <b>2.01E-02</b> | <b>3.52E-02</b> | -0.83 | (-1.39--0.26) | <b>4.66E-03</b> | <b>8.63E-03</b> | -0.04 | (-0.71-0.69)  | 9.17E-01        | 9.36E-01        | 0.80  | (-0.71-2.32)  | 3.00E-01        | 4.58E-01        |
| 366 | PC(P-16:0/18:0)     | -1.20 | (-1.59--0.81) | <b>3.58E-09</b> | <b>2.91E-08</b> | -1.47 | (-1.84--1.09) | <b>1.05E-13</b> | <b>1.20E-12</b> | -0.24 | (-0.76-0.32)  | 4.00E-01        | 5.02E-01        | -2.11 | (-3.09--1.13) | <b>3.73E-05</b> | <b>5.60E-04</b> |
| 367 | PC(P-16:0/18:1)     | -1.21 | (-1.75--0.67) | <b>1.36E-05</b> | <b>5.30E-05</b> | -2.19 | (-2.7--1.69)  | <b>2.94E-16</b> | <b>6.14E-15</b> | -0.28 | (-0.86-0.34)  | 3.73E-01        | 4.73E-01        | -1.99 | (-3.17--0.79) | <b>1.27E-03</b> | <b>6.69E-03</b> |
| 368 | PC(P-16:0/18:2)     | -1.10 | (-1.68--0.5)  | <b>3.02E-04</b> | <b>8.73E-04</b> | -2.03 | (-2.57--1.48) | <b>1.39E-12</b> | <b>1.28E-11</b> | -1.30 | (-1.9--0.66)  | <b>1.43E-04</b> | <b>3.91E-04</b> | -1.51 | (-3.09-0.09)  | 6.46E-02        | 1.50E-01        |
| 369 | PC(P-16:0/18:3)     | -1.64 | (-2.27--1.01) | <b>5.09E-07</b> | <b>2.66E-06</b> | -1.42 | (-1.99--0.84) | <b>2.28E-06</b> | <b>7.17E-06</b> | -0.48 | (-1.01-0.08)  | 9.39E-02        | 1.53E-01        | -0.44 | (-2.21-1.35)  | 6.24E-01        | 7.41E-01        |
| 370 | PC(P-35:2) (a)      | -2.26 | (-3.13--1.39) | <b>5.70E-07</b> | <b>2.91E-06</b> | -1.87 | (-2.71--1.02) | <b>1.87E-05</b> | <b>5.25E-05</b> | -0.45 | (-1.13-0.28)  | 2.20E-01        | 3.08E-01        | -2.39 | (-4.91-0.2)   | 7.04E-02        | 1.58E-01        |
| 371 | PC(P-35:2) (b)      | -1.83 | (-2.55--1.1)  | <b>1.07E-06</b> | <b>5.20E-06</b> | -2.14 | (-2.83--1.45) | <b>2.27E-09</b> | <b>1.13E-08</b> | -1.45 | (-2.06--0.79) | <b>3.89E-05</b> | <b>1.15E-04</b> | -2.72 | (-4.69--0.7)  | <b>8.59E-03</b> | <b>3.22E-02</b> |
| 372 | PC(P-15:0/20:4) (b) | -0.66 | (-1.34-0.01)  | 5.51E-02        | 8.45E-02        | -0.44 | (-1.19-0.32)  | 2.53E-01        | 3.07E-01        | -0.76 | (-1.47-0.01)  | 5.19E-02        | 9.09E-02        | 0.40  | (-1.76-2.61)  | 7.16E-01        | 7.98E-01        |
| 373 | PC(P-18:1/18:1)     | -1.20 | (-1.72--0.68) | <b>7.54E-06</b> | <b>3.17E-05</b> | -1.58 | (-2.08--1.09) | <b>7.85E-10</b> | <b>4.18E-09</b> | 1.22  | (0.39-2.12)   | <b>3.50E-03</b> | <b>7.92E-03</b> | -0.48 | (-1.71-0.76)  | 4.45E-01        | 5.88E-01        |
| 374 | PC(P-18:0/18:2)     | -1.93 | (-2.51--1.36) | <b>1.35E-10</b> | <b>2.16E-09</b> | -2.58 | (-3.1--2.06)  | <b>1.54E-20</b> | <b>1.06E-18</b> | -0.65 | (-1.19--0.07) | <b>2.78E-02</b> | 5.15E-02        | -2.97 | (-4.48--1.45) | <b>1.69E-04</b> | <b>1.48E-03</b> |
| 375 | PC(P-16:0/20:4)     | 0.43  | (-0.18-1.05)  | 1.67E-01        | 2.22E-01        | -0.65 | (-1.18--0.11) | <b>1.81E-02</b> | <b>2.88E-02</b> | -1.10 | (-1.65--0.5)  | <b>4.44E-04</b> | <b>1.14E-03</b> | 0.30  | (-1.26-1.89)  | 7.03E-01        | 7.91E-01        |
| 376 | PC(P-16:0/20:5)     | -0.52 | (-1.56-0.53)  | 3.29E-01        | 3.95E-01        | -0.31 | (-1.37-0.77)  | 5.75E-01        | 6.33E-01        | -1.95 | (-2.64--1.2)  | <b>2.21E-06</b> | <b>7.46E-06</b> | 3.00  | (0.12-5.97)   | <b>4.13E-02</b> | 1.10E-01        |
| 377 | PC(P-17:0/20:4) (a) | -1.01 | (-1.8--0.22)  | <b>1.29E-02</b> | <b>2.38E-02</b> | -0.63 | (-1.41-0.16)  | 1.19E-01        | 1.57E-01        | -1.57 | (-2.22--0.86) | <b>3.59E-05</b> | <b>1.08E-04</b> | -0.85 | (-3.43-1.79)  | 5.22E-01        | 6.50E-01        |

|     |                     |       |               |                 |                 |       |               |                 |                 |       |               |                 |                 |       |              |                 |                 |
|-----|---------------------|-------|---------------|-----------------|-----------------|-------|---------------|-----------------|-----------------|-------|---------------|-----------------|-----------------|-------|--------------|-----------------|-----------------|
| 378 | PC(P-17:0/20:4) (b) | -0.32 | (-1.05-0.42)  | 3.96E-01        | 4.59E-01        | -1.00 | (-1.68--0.31) | <b>4.69E-03</b> | <b>8.66E-03</b> | -1.89 | (-2.47--1.27) | <b>4.13E-08</b> | <b>1.68E-07</b> | -1.03 | (-3.11-1.1)  | 3.39E-01        | 4.95E-01        |
| 379 | PC(P-18:0/20:4)     | -0.09 | (-0.67-0.5)   | 7.64E-01        | 8.02E-01        | -1.20 | (-1.71--0.68) | <b>7.83E-06</b> | <b>2.32E-05</b> | -1.09 | (-1.6--0.56)  | <b>1.16E-04</b> | <b>3.27E-04</b> | -0.77 | (-2.4-0.88)  | 3.56E-01        | 5.09E-01        |
| 380 | PC(P-38:5) (a)      | 0.24  | (-0.36-0.84)  | 4.31E-01        | 4.89E-01        | -0.55 | (-1.09--0.01) | <b>4.46E-02</b> | 6.57E-02        | -1.21 | (-1.75--0.63) | <b>8.09E-05</b> | <b>2.33E-04</b> | 0.72  | (-0.88-2.35) | 3.77E-01        | 5.29E-01        |
| 381 | PC(P-38:5) (b)      | -0.85 | (-1.43--0.27) | <b>4.44E-03</b> | <b>9.70E-03</b> | -1.10 | (-1.67--0.53) | <b>1.76E-04</b> | <b>4.33E-04</b> | -0.87 | (-1.5--0.2)   | <b>1.16E-02</b> | <b>2.34E-02</b> | -0.41 | (-2.09-1.31) | 6.40E-01        | 7.45E-01        |
| 382 | PC(P-16:0/22:6)     | -0.29 | (-1.01-0.43)  | 4.26E-01        | 4.86E-01        | -0.95 | (-1.62--0.28) | <b>5.79E-03</b> | <b>1.03E-02</b> | -1.52 | (-2.09--0.91) | <b>3.95E-06</b> | <b>1.31E-05</b> | 0.28  | (-1.67-2.27) | 7.79E-01        | 8.55E-01        |
| 383 | PC(P-20:0/20:4)     | -0.43 | (-1.04-0.17)  | 1.58E-01        | 2.12E-01        | -1.30 | (-1.83--0.77) | <b>1.74E-06</b> | <b>5.57E-06</b> | -0.86 | (-1.45--0.23) | <b>7.93E-03</b> | <b>1.68E-02</b> | -1.69 | (-3.16--0.2) | <b>2.69E-02</b> | 7.82E-02        |
| 384 | PC(P-40:5) (b)      | -0.80 | (-1.37--0.24) | <b>5.56E-03</b> | <b>1.18E-02</b> | -1.41 | (-1.93--0.9)  | <b>1.16E-07</b> | <b>4.47E-07</b> | -0.80 | (-1.31--0.26) | <b>4.26E-03</b> | <b>9.37E-03</b> | -1.36 | (-2.75-0.05) | 5.94E-02        | 1.43E-01        |
| 385 | PC(P-18:0/22:6)     | -0.68 | (-1.37-0)     | 5.13E-02        | 7.95E-02        | -2.07 | (-2.72--1.42) | <b>9.79E-10</b> | <b>5.11E-09</b> | -1.57 | (-2.08--1.02) | <b>1.26E-07</b> | <b>4.78E-07</b> | -1.63 | (-3.5-0.27)  | 9.23E-02        | 1.88E-01        |
| 386 | PE(16:0_16:1)       | -0.54 | (-1.69-0.63)  | 3.62E-01        | 4.26E-01        | 3.03  | (1.74-4.33)   | <b>3.84E-06</b> | <b>1.18E-05</b> | 0.44  | (-0.57-1.57)  | 4.07E-01        | 5.08E-01        | 4.35  | (0.88-7.95)  | <b>1.38E-02</b> | <b>4.78E-02</b> |
| 387 | PE(16:0_18:1)       | -0.10 | (-0.87-0.67)  | 7.94E-01        | 8.25E-01        | 1.21  | (0.29-2.14)   | <b>1.01E-02</b> | <b>1.71E-02</b> | -0.60 | (-1.29-0.14)  | 1.11E-01        | 1.76E-01        | 0.32  | (-2.24-2.94) | 8.11E-01        | 8.80E-01        |
| 388 | PE(16:0_18:2)       | -0.32 | (-1.18-0.55)  | 4.71E-01        | 5.29E-01        | 0.55  | (-0.44-1.56)  | 2.76E-01        | 3.31E-01        | -0.68 | (-1.39-0.1)   | 8.58E-02        | 1.42E-01        | -0.95 | (-3.68-1.86) | 5.03E-01        | 6.36E-01        |
| 389 | PE(16:1_18:2)       | -0.95 | (-1.96-0.08)  | 6.93E-02        | 1.01E-01        | 0.53  | (-0.35-1.43)  | 2.39E-01        | 2.94E-01        | 0.38  | (-0.4-1.22)   | 3.50E-01        | 4.50E-01        | 0.00  | (-2.28-2.33) | 1.00E+00        | 1.00E+00        |
| 390 | PE(16:0_18:3) (a)   | -1.62 | (-2.53--0.69) | <b>6.80E-04</b> | <b>1.77E-03</b> | 0.67  | (-0.33-1.68)  | 1.90E-01        | 2.42E-01        | 0.07  | (-0.71-0.9)   | 8.73E-01        | 9.06E-01        | -0.67 | (-3.48-2.22) | 6.45E-01        | 7.48E-01        |
| 391 | PE(16:0_18:3) (b)   | -0.42 | (-1.33-0.49)  | 3.65E-01        | 4.27E-01        | 1.99  | (0.89-3.11)   | <b>3.82E-04</b> | <b>8.81E-04</b> | 0.56  | (-0.31-1.5)   | 2.15E-01        | 3.04E-01        | 1.71  | (-1.39-4.9)  | 2.82E-01        | 4.41E-01        |
| 392 | PE(17:0_18:2)       | -1.21 | (-1.9--0.52)  | <b>6.65E-04</b> | <b>1.74E-03</b> | 0.07  | (-0.73-0.89)  | 8.59E-01        | 8.83E-01        | -0.85 | (-1.35--0.31) | <b>2.33E-03</b> | <b>5.41E-03</b> | -1.18 | (-3.43-1.13) | 3.14E-01        | 4.72E-01        |
| 393 | PE(18:0_18:1)       | 0.43  | (-0.21-1.08)  | 1.90E-01        | 2.46E-01        | 1.56  | (0.67-2.45)   | <b>5.73E-04</b> | <b>1.26E-03</b> | -0.09 | (-0.87-0.75)  | 8.21E-01        | 8.74E-01        | 2.66  | (0.19-5.19)  | <b>3.45E-02</b> | 9.47E-02        |
| 394 | PE(18:1_18:1)       | -0.40 | (-1.06-0.27)  | 2.42E-01        | 3.03E-01        | 0.28  | (-0.49-1.05)  | 4.78E-01        | 5.36E-01        | -0.01 | (-1.07-1.17)  | 9.83E-01        | 9.83E-01        | 0.26  | (-2.06-2.63) | 8.29E-01        | 8.96E-01        |
| 395 | PE(18:0_18:2)       | 0.50  | (-0.21-1.22)  | 1.70E-01        | 2.25E-01        | 1.26  | (0.38-2.15)   | <b>5.10E-03</b> | <b>9.24E-03</b> | -0.50 | (-1.17-0.22)  | 1.68E-01        | 2.51E-01        | 1.32  | (-1.13-3.82) | 2.93E-01        | 4.50E-01        |
| 396 | PE(18:1_18:2)       | -0.77 | (-1.58-0.04)  | 6.38E-02        | 9.54E-02        | -0.81 | (-1.77-0.15)  | 9.83E-02        | 1.33E-01        | -0.26 | (-1.01-0.56)  | 5.29E-01        | 6.21E-01        | -2.14 | (-4.71-0.49) | 1.10E-01        | 2.14E-01        |
| 397 | PE(16:0_20:3)       | -0.37 | (-1.21-0.47)  | 3.85E-01        | 4.48E-01        | 0.97  | (-0.01-1.97)  | 5.21E-02        | 7.54E-02        | -0.31 | (-1.06-0.5)   | 4.42E-01        | 5.42E-01        | -0.12 | (-2.72-2.55) | 9.29E-01        | 9.67E-01        |
| 398 | PE(16:0_20:4)       | 0.75  | (0.01-1.5)    | <b>4.65E-02</b> | 7.31E-02        | -0.44 | (-1.27-0.4)   | 3.04E-01        | 3.60E-01        | -0.34 | (-0.96-0.33)  | 3.14E-01        | 4.11E-01        | -1.51 | (-3.89-0.92) | 2.19E-01        | 3.63E-01        |
| 399 | PE(16:1_20:4)       | -0.18 | (-1.08-0.73)  | 6.98E-01        | 7.41E-01        | -0.08 | (-0.84-0.69)  | 8.40E-01        | 8.71E-01        | 0.73  | (-0.09-1.62)  | 8.04E-02        | 1.34E-01        | 1.01  | (-1.06-3.12) | 3.42E-01        | 4.98E-01        |
| 400 | PE(16:0_20:5)       | -0.47 | (-1.52-0.58)  | 3.80E-01        | 4.43E-01        | 0.27  | (-0.78-1.33)  | 6.16E-01        | 6.70E-01        | -0.82 | (-1.58-0.01)  | 5.18E-02        | 9.09E-02        | 1.62  | (-1.04-4.36) | 2.34E-01        | 3.82E-01        |
| 401 | PE(17:0_20:4)       | -0.03 | (-0.7-0.65)   | 9.34E-01        | 9.46E-01        | -0.05 | (-0.82-0.72)  | 8.96E-01        | 9.17E-01        | -1.71 | (-2.3--1.07)  | <b>8.04E-07</b> | <b>2.86E-06</b> | -1.45 | (-3.59-0.74) | 1.91E-01        | 3.24E-01        |
| 402 | PE(18:0_20:3) (a)   | 1.68  | (0.87-2.5)    | <b>4.94E-05</b> | <b>1.72E-04</b> | 2.90  | (1.96-3.84)   | <b>1.44E-09</b> | <b>7.41E-09</b> | -0.61 | (-1.25-0.09)  | 8.50E-02        | 1.41E-01        | 3.60  | (1.22-6.04)  | <b>3.02E-03</b> | <b>1.41E-02</b> |
| 403 | PE(18:0_20:4)       | 2.04  | (1.41-2.67)   | <b>2.05E-10</b> | <b>2.80E-09</b> | 0.25  | (-0.47-0.96)  | 5.01E-01        | 5.59E-01        | -0.70 | (-1.29--0.07) | <b>3.03E-02</b> | 5.55E-02        | 0.55  | (-1.48-2.63) | 5.96E-01        | 7.19E-01        |
| 404 | PE(38:5) (a)        | 0.01  | (-0.72-0.75)  | 9.72E-01        | 9.76E-01        | -0.72 | (-1.56-0.13)  | 9.55E-02        | 1.30E-01        | -0.63 | (-1.26-0.04)  | 6.53E-02        | 1.12E-01        | -1.61 | (-3.89-0.73) | 1.76E-01        | 3.07E-01        |
| 405 | PE(38:5) (b)        | -0.87 | (-1.73--0.01) | <b>4.69E-02</b> | 7.36E-02        | 0.00  | (-0.94-0.95)  | 9.99E-01        | 9.99E-01        | 0.39  | (-0.63-1.53)  | 4.68E-01        | 5.68E-01        | 0.76  | (-2.02-3.62) | 5.95E-01        | 7.19E-01        |
| 406 | PE(16:0_22:6)       | 0.00  | (-0.73-0.74)  | 9.96E-01        | 9.96E-01        | -0.56 | (-1.51-0.4)   | 2.52E-01        | 3.06E-01        | -1.58 | (-2.23--0.88) | <b>2.50E-05</b> | <b>7.75E-05</b> | -0.46 | (-3.22-2.37) | 7.47E-01        | 8.26E-01        |
| 407 | PE(17:0_22:6)       | -0.21 | (-0.95-0.55)  | 5.87E-01        | 6.38E-01        | -0.18 | (-0.98-0.62)  | 6.55E-01        | 7.03E-01        | -1.52 | (-2.1--0.89)  | <b>7.66E-06</b> | <b>2.47E-05</b> | -0.10 | (-2.25-2.09) | 9.25E-01        | 9.66E-01        |
| 408 | PE(18:0_22:4)       | 0.52  | (-0.35-1.4)   | 2.43E-01        | 3.03E-01        | 1.66  | (0.84-2.48)   | <b>6.84E-05</b> | <b>1.77E-04</b> | -0.22 | (-1.01-0.65)  | 6.13E-01        | 6.98E-01        | 2.27  | (0.13-4.45)  | <b>3.74E-02</b> | 1.00E-01        |
| 409 | PE(18:0_22:5) (n3)  | 0.45  | (-0.26-1.16)  | 2.14E-01        | 2.72E-01        | 1.79  | (0.94-2.64)   | <b>3.74E-05</b> | <b>9.97E-05</b> | -1.09 | (-1.86--0.24) | <b>1.27E-02</b> | <b>2.54E-02</b> | 2.54  | (0.19-4.95)  | <b>3.42E-02</b> | 9.47E-02        |
| 410 | PE(18:0_22:5) (n6)  | 0.40  | (-0.53-1.33)  | 4.00E-01        | 4.62E-01        | 0.72  | (-0.23-1.68)  | 1.39E-01        | 1.80E-01        | -0.46 | (-1.41-0.59)  | 3.78E-01        | 4.77E-01        | 2.62  | (0.04-5.27)  | <b>4.66E-02</b> | 1.18E-01        |
| 411 | PE(18:0_22:6)       | 1.34  | (0.55-2.14)   | <b>8.34E-04</b> | <b>2.13E-03</b> | 1.67  | (0.73-2.63)   | <b>5.37E-04</b> | <b>1.20E-03</b> | -1.61 | (-2.34--0.8)  | <b>2.02E-04</b> | <b>5.43E-04</b> | 3.81  | (1.08-6.61)  | <b>6.06E-03</b> | <b>2.36E-02</b> |
| 412 | PE(40:7)            | -0.40 | (-1.25-0.44)  | 3.48E-01        | 4.14E-01        | -1.43 | (-2.41--0.44) | <b>4.72E-03</b> | <b>8.68E-03</b> | -1.29 | (-1.94--0.58) | <b>5.38E-04</b> | <b>1.36E-03</b> | -1.14 | (-3.97-1.76) | 4.36E-01        | 5.79E-01        |
| 413 | PE(O-34:1)          | -1.42 | (-2--0.83)    | <b>2.58E-06</b> | <b>1.19E-05</b> | -1.43 | (-2.04--0.82) | <b>6.33E-06</b> | <b>1.91E-05</b> | 0.33  | (-0.78-1.57)  | 5.73E-01        | 6.59E-01        | -1.48 | (-3.2-0.26)  | 9.51E-02        | 1.93E-01        |
| 414 | PE(O-16:0/18:2)     | -2.74 | (-3.5--1.96)  | <b>1.39E-11</b> | <b>2.79E-10</b> | -2.48 | (-3.27--1.68) | <b>2.70E-09</b> | <b>1.32E-08</b> | -0.23 | (-2-1.95)     | 8.24E-01        | 8.75E-01        | -0.34 | (-2.54-1.91) | 7.64E-01        | 8.42E-01        |
| 415 | PE(O-18:1/18:2)     | -1.56 | (-2.3--0.82)  | <b>4.20E-05</b> | <b>1.47E-04</b> | -1.10 | (-1.81--0.38) | <b>2.71E-03</b> | <b>5.25E-03</b> | 0.06  | (-0.88-1.09)  | 9.08E-01        | 9.31E-01        | -0.25 | (-2.27-1.81) | 8.10E-01        | 8.80E-01        |
| 416 | PE(O-16:0/20:4)     | -1.39 | (-2.12--0.65) | <b>2.38E-04</b> | <b>7.02E-04</b> | -1.38 | (-2.13--0.61) | <b>4.51E-04</b> | <b>1.03E-03</b> | -0.81 | (-1.62-0.07)  | 6.94E-02        | 1.18E-01        | 1.19  | (-0.97-3.4)  | 2.82E-01        | 4.41E-01        |
| 417 | PE(O-36:5)          | -2.34 | (-3.42--1.25) | <b>3.37E-05</b> | <b>1.20E-04</b> | -1.17 | (-2.3--0.03)  | <b>4.50E-02</b> | 6.59E-02        | -0.42 | (-1.08-0.29)  | 2.38E-01        | 3.31E-01        | 2.28  | (-0.48-5.12) | 1.06E-01        | 2.10E-01        |
| 418 | PE(O-16:0/22:4)     | -0.63 | (-1.21--0.05) | <b>3.37E-02</b> | 5.62E-02        | -0.79 | (-1.37--0.22) | <b>7.21E-03</b> | <b>1.26E-02</b> | 0.56  | (-0.18-1.36)  | 1.43E-01        | 2.19E-01        | 0.37  | (-1.29-2.06) | 6.60E-01        | 7.54E-01        |
| 419 | PE(O-18:0/20:4)     | -1.81 | (-2.63--0.99) | <b>2.02E-05</b> | <b>7.69E-05</b> | -1.76 | (-2.55--0.97) | <b>1.81E-05</b> | <b>5.11E-05</b> | -0.17 | (-0.95-0.69)  | 6.94E-01        | 7.73E-01        | 0.60  | (-1.82-3.08) | 6.30E-01        | 7.41E-01        |
| 420 | PE(O-38:5) (a)      | -1.44 | (-2.16--0.71) | <b>1.14E-04</b> | <b>3.65E-04</b> | -0.89 | (-1.6--0.18)  | <b>1.37E-02</b> | <b>2.25E-02</b> | -0.10 | (-0.78-0.64)  | 7.90E-01        | 8.51E-01        | 1.52  | (-0.73-3.83) | 1.86E-01        | 3.18E-01        |
| 421 | PE(O-38:5) (b)      | -1.98 | (-2.64--1.31) | <b>9.88E-09</b> | <b>6.87E-08</b> | -1.06 | (-1.81--0.29) | <b>6.73E-03</b> | <b>1.19E-02</b> | 0.16  | (-0.75-1.17)  | 7.38E-01        | 8.15E-01        | 0.24  | (-1.68-2.19) | 8.07E-01        | 8.80E-01        |
| 422 | PE(O-16:0/22:6)     | -1.03 | (-1.66--0.4)  | <b>1.52E-03</b> | <b>3.67E-03</b> | -0.83 | (-1.53--0.13) | <b>2.05E-02</b> | <b>3.21E-02</b> | 0.55  | (-0.23-1.38)  | 1.70E-01        | 2.52E-01        | 0.77  | (-1.03-2.6)  | 4.02E-01        | 5.53E-01        |
| 423 | PE(O-18:0/22:6)     | -1.54 | (-2.14--0.93) | <b>1.02E-06</b> | <b>5.01E-06</b> | -1.41 | (-2.04--0.77) | <b>1.78E-05</b> | <b>5.04E-05</b> | 0.01  | (-0.62-0.68)  | 9.77E-01        | 9.79E-01        | -0.02 | (-1.8-1.8)   | 9.85E-01        | 9.93E-01        |
| 424 | PE(O-18:1/22:6)     | -1.16 | (-1.76--0.56) | <b>1.73E-04</b> | <b>5.35E-04</b> | -1.29 | (-1.9--0.67)  | <b>5.13E-05</b> | <b>1.35E-04</b> | 0.08  | (-0.49-0.68)  | 7.96E-01        | 8.54E-01        | 0.41  | (-1.42-2.28) | 6.60E-01        | 7.54E-01        |
| 425 | PE(P-16:0/18:1)     | -1.04 | (-1.56--0.52) | <b>1.03E-04</b> | <b>3.35E-04</b> | -0.62 | (-1.13--0.11) | <b>1.76E-02</b> | <b>2.81E-02</b> | 1.69  | (0.98-2.44)   | <b>1.11E-06</b> | <b>3.90E-06</b> | -0.19 | (-1.6-1.25)  | 7.98E-01        | 8.73E-01        |

|     |                      |       |               |                 |                 |       |               |                 |                 |       |               |                 |                 |       |               |                 |                 |
|-----|----------------------|-------|---------------|-----------------|-----------------|-------|---------------|-----------------|-----------------|-------|---------------|-----------------|-----------------|-------|---------------|-----------------|-----------------|
| 426 | PE(P-16:0/18:2)      | -1.53 | (-2.2--0.85)  | <b>1.07E-05</b> | <b>4.41E-05</b> | -0.73 | (-1.4--0.05)  | <b>3.44E-02</b> | 5.14E-02        | 0.14  | (-0.73-1.1)   | 7.59E-01        | 8.29E-01        | 0.55  | (-1.4-2.55)   | 5.80E-01        | 7.05E-01        |
| 427 | PE(P-16:0/20:3)      | -0.36 | (-1.08-0.37)  | 3.33E-01        | 3.97E-01        | 1.10  | (0.38-1.82)   | <b>2.78E-03</b> | <b>5.35E-03</b> | 0.18  | (-0.65-1.09)  | 6.78E-01        | 7.58E-01        | 4.14  | (2.26-6.06)   | <b>1.60E-05</b> | <b>3.36E-04</b> |
| 428 | PE(P-16:0/20:4)      | 0.15  | (-0.58-0.88)  | 6.90E-01        | 7.36E-01        | 0.18  | (-0.55-0.9)   | 6.32E-01        | 6.83E-01        | -0.23 | (-0.99-0.59)  | 5.66E-01        | 6.53E-01        | 3.45  | (1.36-5.57)   | <b>1.16E-03</b> | <b>6.34E-03</b> |
| 429 | PE(P-16:0/20:5)      | -1.00 | (-2.32-0.34)  | 1.42E-01        | 1.93E-01        | 0.17  | (-1.12-1.48)  | 7.96E-01        | 8.34E-01        | -0.81 | (-2.51-1.27)  | 4.15E-01        | 5.15E-01        | 4.78  | (1.15-8.54)   | <b>9.55E-03</b> | <b>3.47E-02</b> |
| 430 | PE(P-16:0/22:4)      | 0.38  | (-0.18-0.94)  | 1.87E-01        | 2.43E-01        | -0.41 | (-0.96-0.13)  | 1.38E-01        | 1.79E-01        | 0.23  | (-0.47-0.98)  | 5.32E-01        | 6.23E-01        | -0.44 | (-1.83-0.97)  | 5.37E-01        | 6.65E-01        |
| 431 | PE(P-16:0/22:5) (n3) | -0.62 | (-1.21--0.02) | <b>4.12E-02</b> | 6.65E-02        | 0.30  | (-0.26-0.87)  | 2.97E-01        | 3.54E-01        | -0.48 | (-1.19-0.28)  | 2.09E-01        | 2.98E-01        | 1.24  | (-0.52-3.03)  | 1.69E-01        | 3.02E-01        |
| 432 | PE(P-16:0/22:5) (n6) | -0.76 | (-1.4--0.12)  | <b>2.07E-02</b> | <b>3.60E-02</b> | -0.37 | (-0.95-0.22)  | 2.21E-01        | 2.77E-01        | 0.91  | (0.1-1.79)    | <b>2.66E-02</b> | <b>4.98E-02</b> | 0.45  | (-1.46-2.39)  | 6.48E-01        | 7.49E-01        |
| 433 | PE(P-16:0/22:6)      | 0.09  | (-0.49-0.67)  | 7.67E-01        | 8.02E-01        | -0.02 | (-0.62-0.58)  | 9.45E-01        | 9.61E-01        | 0.17  | (-0.5-0.88)   | 6.33E-01        | 7.19E-01        | 1.74  | (0.13-3.38)   | <b>3.45E-02</b> | 9.47E-02        |
| 434 | PE(P-17:0/20:4) (a)  | -0.28 | (-1.14-0.59)  | 5.22E-01        | 5.75E-01        | -0.20 | (-1.09-0.7)   | 6.62E-01        | 7.10E-01        | -0.39 | (-0.98-0.23)  | 2.11E-01        | 2.99E-01        | 1.34  | (-1-3.73)     | 2.64E-01        | 4.21E-01        |
| 435 | PE(P-17:0/20:4) (b)  | -0.21 | (-1.01-0.6)   | 6.15E-01        | 6.63E-01        | -0.27 | (-1.05-0.52)  | 5.04E-01        | 5.62E-01        | -0.96 | (-1.57--0.3)  | <b>4.73E-03</b> | <b>1.03E-02</b> | 1.16  | (-0.96-3.33)  | 2.86E-01        | 4.45E-01        |
| 436 | PE(P-17:0/22:6) (a)  | -1.24 | (-2.03--0.44) | <b>2.33E-03</b> | <b>5.35E-03</b> | -0.51 | (-1.32-0.31)  | 2.22E-01        | 2.77E-01        | -0.27 | (-1.02-0.55)  | 5.11E-01        | 6.02E-01        | 0.05  | (-2.29-2.45)  | 9.65E-01        | 9.85E-01        |
| 437 | PE(P-17:0/22:6) (b)  | -0.75 | (-1.46--0.03) | <b>4.23E-02</b> | 6.81E-02        | -0.90 | (-1.67--0.13) | <b>2.28E-02</b> | <b>3.55E-02</b> | -0.44 | (-1.11-0.27)  | 2.18E-01        | 3.06E-01        | -0.50 | (-2.48-1.53)  | 6.27E-01        | 7.41E-01        |
| 438 | PE(P-18:0/18:1)      | -1.25 | (-1.84--0.66) | <b>3.98E-05</b> | <b>1.40E-04</b> | -1.01 | (-1.6--0.41)  | <b>9.72E-04</b> | <b>2.07E-03</b> | 1.01  | (0.24-1.85)   | <b>9.34E-03</b> | <b>1.94E-02</b> | -0.71 | (-2.29-0.88)  | 3.78E-01        | 5.29E-01        |
| 439 | PE(P-18:0/18:2)      | -1.83 | (-2.48--1.19) | <b>4.04E-08</b> | <b>2.66E-07</b> | -1.53 | (-2.15--0.91) | <b>1.62E-06</b> | <b>5.22E-06</b> | -0.15 | (-1-0.78)     | 7.43E-01        | 8.16E-01        | -0.69 | (-2.59-1.24)  | 4.78E-01        | 6.22E-01        |
| 440 | PE(P-18:0/20:3)      | -0.92 | (-1.55--0.28) | <b>4.71E-03</b> | <b>1.01E-02</b> | -0.15 | (-0.76-0.46)  | 6.31E-01        | 6.83E-01        | -0.34 | (-0.91-0.26)  | 2.56E-01        | 3.51E-01        | 2.28  | (0.68-3.89)   | <b>5.08E-03</b> | <b>2.10E-02</b> |
| 441 | PE(P-18:0/20:4)      | -0.19 | (-0.95-0.58)  | 6.33E-01        | 6.81E-01        | -0.83 | (-1.51--0.15) | <b>1.66E-02</b> | <b>2.68E-02</b> | -0.65 | (-1.33-0.08)  | 7.77E-02        | 1.30E-01        | 1.63  | (-0.45-3.75)  | 1.24E-01        | 2.33E-01        |
| 442 | PE(P-18:0/20:5)      | -1.63 | (-2.99--0.26) | <b>2.00E-02</b> | <b>3.52E-02</b> | -0.80 | (-2.1-0.52)   | 2.34E-01        | 2.91E-01        | -1.97 | (-3.3--0.38)  | <b>1.77E-02</b> | <b>3.42E-02</b> | 3.62  | (0.14-7.22)   | <b>4.16E-02</b> | 1.10E-01        |
| 443 | PE(P-18:0/22:4)      | -0.72 | (-1.31--0.13) | <b>1.74E-02</b> | <b>3.11E-02</b> | -0.98 | (-1.57--0.38) | <b>1.48E-03</b> | <b>3.02E-03</b> | -0.28 | (-1.04-0.54)  | 4.88E-01        | 5.80E-01        | -1.74 | (-3.12--0.34) | <b>1.51E-02</b> | 5.03E-02        |
| 444 | PE(P-18:0/22:5) (n3) | -0.81 | (-1.4--0.21)  | <b>8.18E-03</b> | <b>1.61E-02</b> | -0.47 | (-1-0.07)     | 8.56E-02        | 1.17E-01        | -0.41 | (-1.01-0.23)  | 2.02E-01        | 2.89E-01        | 0.50  | (-1.13-2.16)  | 5.49E-01        | 6.78E-01        |
| 445 | PE(P-18:0/22:5) (n6) | -1.29 | (-1.87--0.72) | <b>1.35E-05</b> | <b>5.30E-05</b> | -1.25 | (-1.83--0.67) | <b>3.16E-05</b> | <b>8.48E-05</b> | 0.36  | (-0.27-1.04)  | 2.67E-01        | 3.62E-01        | -0.44 | (-2.36-1.51)  | 6.54E-01        | 7.51E-01        |
| 446 | PE(P-18:0/22:6)      | -0.79 | (-1.43--0.14) | <b>1.80E-02</b> | <b>3.18E-02</b> | -1.21 | (-1.87--0.55) | <b>3.71E-04</b> | <b>8.65E-04</b> | -0.06 | (-0.69-0.62)  | 8.57E-01        | 9.01E-01        | 0.00  | (-1.8-1.82)   | 9.98E-01        | 1.00E+00        |
| 447 | PE(P-18:1/18:1)      | -0.90 | (-1.45--0.35) | <b>1.43E-03</b> | <b>3.50E-03</b> | -0.83 | (-1.38--0.28) | <b>3.06E-03</b> | <b>5.83E-03</b> | 0.36  | (-0.26-1.02)  | 2.58E-01        | 3.53E-01        | -0.47 | (-1.9-0.98)   | 5.21E-01        | 6.50E-01        |
| 448 | PE(P-18:1/18:2)      | -1.86 | (-2.56--1.16) | <b>3.27E-07</b> | <b>1.80E-06</b> | -1.22 | (-1.9--0.53)  | <b>5.96E-04</b> | <b>1.30E-03</b> | -0.63 | (-1.73-0.61)  | 3.01E-01        | 3.97E-01        | -0.76 | (-2.77-1.29)  | 4.62E-01        | 6.05E-01        |
| 449 | PE(P-18:1/20:4)      | -0.06 | (-0.81-0.71)  | 8.85E-01        | 9.02E-01        | -0.43 | (-1.13-0.27)  | 2.28E-01        | 2.83E-01        | -0.55 | (-1.23-0.19)  | 1.40E-01        | 2.14E-01        | 1.88  | (-0.24-4.04)  | 8.28E-02        | 1.76E-01        |
| 450 | PE(P-18:1/20:5)      | -1.57 | (-2.88--0.25) | <b>2.01E-02</b> | <b>3.52E-02</b> | -0.22 | (-1.51-1.08)  | 7.37E-01        | 7.75E-01        | -0.82 | (-2.78-1.69)  | 4.88E-01        | 5.80E-01        | 3.76  | (0.1-7.55)    | <b>4.42E-02</b> | 1.14E-01        |
| 451 | PE(P-18:1/22:4)      | -0.28 | (-0.92-0.37)  | 4.02E-01        | 4.62E-01        | -0.99 | (-1.63--0.35) | <b>2.44E-03</b> | <b>4.77E-03</b> | 0.33  | (-0.55-1.3)   | 4.70E-01        | 5.68E-01        | -1.15 | (-2.57-0.28)  | 1.14E-01        | 2.16E-01        |
| 452 | PE(P-18:1/22:5) (a)  | -0.71 | (-1.33--0.09) | <b>2.54E-02</b> | <b>4.35E-02</b> | -0.39 | (-0.96-0.18)  | 1.83E-01        | 2.33E-01        | -0.38 | (-1-0.29)     | 2.55E-01        | 3.51E-01        | 0.91  | (-0.84-2.69)  | 3.07E-01        | 4.66E-01        |
| 453 | PE(P-18:1/22:6) (a)  | -0.50 | (-1.16-0.15)  | 1.32E-01        | 1.81E-01        | -0.66 | (-1.33-0.02)  | 5.55E-02        | 7.90E-02        | -0.05 | (-0.73-0.67)  | 8.79E-01        | 9.09E-01        | 0.85  | (-1.04-2.77)  | 3.80E-01        | 5.29E-01        |
| 454 | PE(P-20:0/18:1)      | -1.27 | (-1.89--0.65) | <b>7.01E-05</b> | <b>2.35E-04</b> | -1.14 | (-1.71--0.57) | <b>1.01E-04</b> | <b>2.52E-04</b> | 0.52  | (-1.11-2.44)  | 5.56E-01        | 6.45E-01        | -1.09 | (-2.82-0.67)  | 2.22E-01        | 3.67E-01        |
| 455 | PE(P-20:0/18:2)      | -1.81 | (-2.36--1.25) | <b>3.40E-10</b> | <b>4.18E-09</b> | -1.98 | (-2.5--1.45)  | <b>1.04E-12</b> | <b>9.79E-12</b> | -0.03 | (-0.46-0.42)  | 9.01E-01        | 9.28E-01        | -2.72 | (-4.31--1.11) | <b>1.09E-03</b> | <b>6.15E-03</b> |
| 456 | PE(P-20:0/20:4)      | -0.17 | (-0.76-0.43)  | 5.85E-01        | 6.36E-01        | -1.62 | (-2.15--1.08) | <b>6.16E-09</b> | <b>2.90E-08</b> | -0.61 | (-1.46-0.34)  | 2.00E-01        | 2.87E-01        | -0.21 | (-1.81-1.41)  | 7.97E-01        | 8.73E-01        |
| 457 | PE(P-20:0/22:6)      | -0.78 | (-1.31--0.26) | <b>3.71E-03</b> | <b>8.27E-03</b> | -1.89 | (-2.39--1.4)  | <b>3.83E-13</b> | <b>3.92E-12</b> | -0.70 | (-1.25--0.11) | <b>2.13E-02</b> | <b>4.05E-02</b> | -1.79 | (-3.28--0.27) | <b>2.13E-02</b> | 6.63E-02        |
| 458 | PE(P-20:1/20:4)      | -0.41 | (-1.28-0.47)  | 3.64E-01        | 4.27E-01        | -1.06 | (-2.02--0.09) | <b>3.22E-02</b> | <b>4.84E-02</b> | -0.82 | (-1.84-0.32)  | 1.51E-01        | 2.29E-01        | 0.93  | (-1.28-3.19)  | 4.10E-01        | 5.58E-01        |
| 459 | PG(34:2)             | -1.07 | (-1.82--0.31) | <b>6.14E-03</b> | <b>1.28E-02</b> | 1.17  | (0.21-2.14)   | <b>1.72E-02</b> | <b>2.76E-02</b> | -0.67 | (-1.86-0.7)   | 3.23E-01        | 4.21E-01        | 2.03  | (-0.75-4.88)  | 1.53E-01        | 2.80E-01        |
| 460 | PG(36:1)             | -0.28 | (-0.94-0.38)  | 4.00E-01        | 4.62E-01        | 2.52  | (1.6-3.45)    | <b>8.86E-08</b> | <b>3.52E-07</b> | -1.38 | (-2.5--0.09)  | <b>3.65E-02</b> | 6.63E-02        | 2.63  | (-0.01-5.33)  | 5.10E-02        | 1.27E-01        |
| 461 | PI(16:0/16:0)        | -2.44 | (-3.37--1.51) | <b>4.46E-07</b> | <b>2.38E-06</b> | 1.75  | (0.7-2.81)    | <b>1.12E-03</b> | <b>2.36E-03</b> | -0.09 | (-1.03-0.93)  | 8.50E-01        | 8.99E-01        | 3.09  | (0.46-5.79)   | <b>2.10E-02</b> | 6.58E-02        |
| 462 | PI(16:0_16:1)        | -1.73 | (-2.79--0.66) | <b>1.69E-03</b> | <b>4.01E-03</b> | 3.85  | (2.77-4.94)   | <b>3.76E-12</b> | <b>3.11E-11</b> | 0.72  | (-0.12-1.62)  | 9.40E-02        | 1.53E-01        | 8.42  | (5.56-11.34)  | <b>6.42E-09</b> | <b>1.03E-06</b> |
| 463 | PI(34:0)             | -2.66 | (-3.58--1.72) | <b>4.56E-08</b> | <b>2.96E-07</b> | 1.08  | (0-2.17)      | <b>4.90E-02</b> | 7.13E-02        | -1.86 | (-2.99--0.54) | <b>7.41E-03</b> | <b>1.58E-02</b> | -0.02 | (-3.05-3.11)  | 9.90E-01        | 9.96E-01        |
| 464 | PI(34:1)             | -2.01 | (-2.68--1.34) | <b>8.14E-09</b> | <b>5.75E-08</b> | 0.20  | (-0.53-0.93)  | 5.92E-01        | 6.47E-01        | -0.19 | (-0.81-0.47)  | 5.56E-01        | 6.45E-01        | 0.45  | (-1.4-2.34)   | 6.33E-01        | 7.42E-01        |
| 465 | PI(17:0_18:1)        | -2.37 | (-2.95--1.79) | <b>6.39E-15</b> | <b>2.79E-13</b> | 0.44  | (-0.29-1.18)  | 2.37E-01        | 2.93E-01        | -1.30 | (-2.26--0.22) | <b>1.94E-02</b> | <b>3.75E-02</b> | -0.77 | (-2.94-1.45)  | 4.91E-01        | 6.31E-01        |
| 466 | PI(17:0_18:2)        | -2.70 | (-3.33--2.07) | <b>4.72E-16</b> | <b>2.83E-14</b> | 0.69  | (-0.03-1.41)  | 6.05E-02        | 8.54E-02        | -1.91 | (-2.87--0.83) | <b>9.67E-04</b> | <b>2.37E-03</b> | 0.15  | (-1.85-2.18)  | 8.85E-01        | 9.42E-01        |
| 467 | PI(18:0_18:1)        | -1.94 | (-2.65--1.23) | <b>1.16E-07</b> | <b>7.23E-07</b> | -0.74 | (-1.49-0.01)  | 5.26E-02        | 7.58E-02        | -1.18 | (-1.84--0.46) | <b>1.71E-03</b> | <b>4.02E-03</b> | -2.01 | (-4.12-0.14)  | 6.70E-02        | 1.52E-01        |
| 468 | PI(36:2)             | -1.93 | (-2.51--1.34) | <b>2.53E-10</b> | <b>3.28E-09</b> | -0.30 | (-0.88-0.3)   | 3.26E-01        | 3.83E-01        | -1.22 | (-1.78--0.62) | <b>1.28E-04</b> | <b>3.56E-04</b> | -1.49 | (-3.08-0.13)  | 7.12E-02        | 1.58E-01        |
| 469 | PI(18:1_18:2)        | -2.66 | (-3.29--2.03) | <b>1.11E-15</b> | <b>5.91E-14</b> | -1.29 | (-1.97--0.61) | <b>2.16E-04</b> | <b>5.17E-04</b> | -1.47 | (-1.98--0.93) | <b>4.93E-07</b> | <b>1.78E-06</b> | -3.22 | (-4.99--1.41) | <b>5.62E-04</b> | <b>3.65E-03</b> |
| 470 | PI(16:0_20:3) (a)    | -2.16 | (-2.82--1.5)  | <b>3.96E-10</b> | <b>4.64E-09</b> | 0.93  | (0.22-1.65)   | <b>1.07E-02</b> | <b>1.78E-02</b> | 0.22  | (-0.31-0.79)  | 4.19E-01        | 5.18E-01        | -0.04 | (-1.72-1.66)  | 9.62E-01        | 9.85E-01        |
| 471 | PI(16:0_20:3) (b)    | -2.46 | (-3.2--1.72)  | <b>1.99E-10</b> | <b>2.80E-09</b> | 0.86  | (0.13-1.6)    | <b>2.06E-02</b> | <b>3.21E-02</b> | 2.99  | (1.94-4.14)   | <b>2.09E-09</b> | <b>9.74E-09</b> | 0.67  | (-1.27-2.64)  | 5.00E-01        | 6.34E-01        |
| 472 | PI(16:0_20:4)        | -1.45 | (-2.03--0.86) | <b>1.88E-06</b> | <b>8.78E-06</b> | 0.99  | (0.36-1.62)   | <b>2.13E-03</b> | <b>4.20E-03</b> | 0.12  | (-0.42-0.7)   | 6.69E-01        | 7.50E-01        | 1.36  | (-0.32-3.07)  | 1.12E-01        | 2.14E-01        |
| 473 | PI(18:0_20:2)        | -2.66 | (-3.36--1.95) | <b>6.56E-13</b> | <b>1.85E-11</b> | -0.07 | (-0.8-0.66)   | 8.50E-01        | 8.75E-01        | 2.45  | (1.2-3.85)    | <b>5.83E-05</b> | <b>1.70E-04</b> | -2.45 | (-4.37--0.49) | <b>1.48E-02</b> | 5.00E-02        |

|     |                    |       |               |                 |                 |       |               |                 |                 |       |               |                 |                 |       |              |          |          |
|-----|--------------------|-------|---------------|-----------------|-----------------|-------|---------------|-----------------|-----------------|-------|---------------|-----------------|-----------------|-------|--------------|----------|----------|
| 474 | PI(18:0_20:3) (a)  | -0.92 | (-1.42--0.41) | <b>4.19E-04</b> | <b>1.18E-03</b> | -0.19 | (-0.7-0.31)   | 4.57E-01        | 5.16E-01        | -0.28 | (-0.75-0.22)  | 2.65E-01        | 3.60E-01        | -1.02 | (-2.35-0.32) | 1.33E-01 | 2.48E-01 |
| 475 | PI(18:0_20:4)      | -0.79 | (-1.31--0.28) | <b>2.68E-03</b> | <b>6.09E-03</b> | -0.13 | (-0.63-0.37)  | 6.01E-01        | 6.56E-01        | -0.59 | (-1.01--0.14) | <b>1.08E-02</b> | <b>2.19E-02</b> | -1.18 | (-2.55-0.2)  | 9.21E-02 | 1.88E-01 |
| 476 | PI(38:5) (a)       | -2.43 | (-2.97--1.88) | <b>5.10E-17</b> | <b>4.08E-15</b> | -0.27 | (-0.84-0.3)   | 3.46E-01        | 4.00E-01        | -0.59 | (-1.16-0.02)  | 5.72E-02        | 9.95E-02        | -1.02 | (-2.47-0.45) | 1.73E-01 | 3.06E-01 |
| 477 | PI(38:6)           | -2.63 | (-3.27--1.98) | <b>1.30E-14</b> | <b>5.19E-13</b> | -0.89 | (-1.56--0.21) | <b>1.01E-02</b> | <b>1.70E-02</b> | -0.92 | (-1.44--0.37) | <b>1.31E-03</b> | <b>3.11E-03</b> | -0.06 | (-1.76-1.66) | 9.42E-01 | 9.74E-01 |
| 478 | PI(18:0_22:4)      | -1.24 | (-1.89--0.58) | <b>2.27E-04</b> | <b>6.78E-04</b> | 0.25  | (-0.38-0.9)   | 4.35E-01        | 4.92E-01        | 1.20  | (0.52-1.92)   | <b>4.03E-04</b> | <b>1.05E-03</b> | -0.81 | (-2.49-0.89) | 3.47E-01 | 5.03E-01 |
| 479 | PI(18:0_22:5) (n3) | -1.73 | (-2.4--1.06)  | <b>5.69E-07</b> | <b>2.91E-06</b> | 0.86  | (0.2-1.52)    | <b>1.06E-02</b> | <b>1.78E-02</b> | -1.24 | (-1.88--0.56) | <b>5.87E-04</b> | <b>1.47E-03</b> | 0.63  | (-1.16-2.45) | 4.93E-01 | 6.31E-01 |
| 480 | PI(18:0_22:6)      | -2.03 | (-2.68--1.38) | <b>2.31E-09</b> | <b>2.05E-08</b> | -0.63 | (-1.3-0.05)   | 6.94E-02        | 9.71E-02        | -1.11 | (-1.63--0.55) | <b>1.59E-04</b> | <b>4.30E-04</b> | -0.13 | (-1.98-1.75) | 8.89E-01 | 9.44E-01 |

**Table S2C.** Association of antenatal lipidomic profiles with antenatal BMI

| Studies    |               | Antenatal BMI                                                     |               |                 |                 |
|------------|---------------|-------------------------------------------------------------------|---------------|-----------------|-----------------|
| Covariates |               | adjusted for ethnicity, maternal age and maternal education level |               |                 |                 |
| No.        | Lipid Species | %change in lipid concentration per unit BMI                       | 95%CI         | p-value         | p-value(BH)     |
| 1          | AC(12:0)      | 0.49                                                              | (-0.50- 1.50) | 3.30E-01        | 3.94E-01        |
| 2          | AC(13:0)      | 1.28                                                              | ( 0.01- 2.56) | <b>4.79E-02</b> | 8.05E-02        |
| 3          | AC(14:0)      | 0.45                                                              | (-0.20- 1.12) | 1.76E-01        | 2.33E-01        |
| 4          | AC(14:1)      | 1.43                                                              | ( 0.34- 2.54) | <b>1.04E-02</b> | <b>2.12E-02</b> |
| 5          | AC(14:2)      | 1.09                                                              | ( 0.05- 2.14) | <b>4.02E-02</b> | 6.96E-02        |
| 6          | AC(16:0)      | 0.37                                                              | (-0.11- 0.86) | 1.33E-01        | 1.86E-01        |
| 7          | AC(16:1)      | 1.22                                                              | ( 0.44- 2.01) | <b>2.06E-03</b> | <b>5.13E-03</b> |
| 8          | AC(18:0)      | -0.09                                                             | (-0.59- 0.40) | 7.15E-01        | 7.73E-01        |
| 9          | AC(18:1)      | 1.25                                                              | ( 0.59- 1.92) | <b>2.15E-04</b> | <b>6.73E-04</b> |
| 10         | AC(18:2)      | 0.86                                                              | ( 0.22- 1.51) | <b>8.72E-03</b> | <b>1.81E-02</b> |
| 11         | CE(14:0)      | -1.76                                                             | (-2.29--1.23) | <b>1.93E-10</b> | <b>2.65E-09</b> |
| 12         | CE(16:1)      | -0.73                                                             | (-1.46- 0.00) | 5.07E-02        | 8.44E-02        |
| 13         | CE(18:0)      | -1.04                                                             | (-1.53--0.55) | <b>3.22E-05</b> | <b>1.24E-04</b> |
| 14         | CE(18:1)      | -0.86                                                             | (-1.15--0.57) | <b>1.10E-08</b> | <b>8.35E-08</b> |
| 15         | CE(18:2)      | -0.79                                                             | (-1.12--0.45) | <b>4.07E-06</b> | <b>1.95E-05</b> |
| 16         | CE(18:3)      | -1.70                                                             | (-2.28--1.10) | <b>3.30E-08</b> | <b>2.20E-07</b> |
| 17         | CE(20:1)      | -0.83                                                             | (-1.26--0.40) | <b>1.92E-04</b> | <b>6.13E-04</b> |
| 18         | CE(20:2)      | -1.21                                                             | (-1.60--0.81) | <b>3.72E-09</b> | <b>3.19E-08</b> |
| 19         | CE(20:4)      | -0.63                                                             | (-1.23--0.02) | <b>4.21E-02</b> | 7.20E-02        |
| 20         | CE(20:5)      | -1.44                                                             | (-2.70--0.16) | <b>2.74E-02</b> | <b>4.96E-02</b> |
| 21         | CE(22:5) (n6) | -1.82                                                             | (-2.37--1.26) | <b>4.43E-10</b> | <b>5.24E-09</b> |
| 22         | CE(22:6)      | -1.50                                                             | (-2.17--0.81) | <b>2.05E-05</b> | <b>8.21E-05</b> |
| 23         | CE(24:5)      | -1.96                                                             | (-2.63--1.29) | <b>1.94E-08</b> | <b>1.35E-07</b> |
| 24         | CE(24:6)      | -2.36                                                             | (-3.05--1.67) | <b>6.50E-11</b> | <b>1.04E-09</b> |
| 25         | DG(16:0_16:1) | 0.72                                                              | (-0.25- 1.69) | 1.45E-01        | 1.99E-01        |
| 26         | DG(14:0_18:2) | -0.96                                                             | (-1.90--0.02) | <b>4.62E-02</b> | 7.81E-02        |

|    |                    |       |               |                 |                 |
|----|--------------------|-------|---------------|-----------------|-----------------|
| 27 | DG(16:0_18:1)      | 1.22  | ( 0.52- 1.92) | <b>6.17E-04</b> | <b>1.76E-03</b> |
| 28 | DG(16:1_18:1)      | 0.64  | (-0.17- 1.46) | 1.21E-01        | 1.73E-01        |
| 29 | DG(16:0_18:2)      | 0.83  | ( 0.16- 1.51) | <b>1.59E-02</b> | <b>3.06E-02</b> |
| 30 | DG(18:0_18:1)      | 1.22  | ( 0.58- 1.86) | <b>1.73E-04</b> | <b>5.66E-04</b> |
| 31 | DG(18:1_18:1)      | 1.06  | ( 0.37- 1.76) | <b>2.51E-03</b> | <b>6.17E-03</b> |
| 32 | DG(18:0_18:2)      | 0.92  | ( 0.21- 1.64) | <b>1.10E-02</b> | <b>2.23E-02</b> |
| 33 | DG(18:1_18:2)      | 0.64  | (-0.05- 1.34) | 6.83E-02        | 1.08E-01        |
| 34 | DG(18:2_18:2)      | 0.57  | (-0.32- 1.46) | 2.10E-01        | 2.74E-01        |
| 35 | DG(18:1_18:3)      | 0.17  | (-0.57- 0.91) | 6.60E-01        | 7.21E-01        |
| 36 | DG(16:0_20:4)      | 1.22  | ( 0.34- 2.11) | <b>6.58E-03</b> | <b>1.45E-02</b> |
| 37 | DG(18:1_20:3)      | 0.45  | (-0.27- 1.17) | 2.22E-01        | 2.86E-01        |
| 38 | DG(18:1_20:4)      | 1.01  | ( 0.30- 1.72) | <b>5.34E-03</b> | <b>1.22E-02</b> |
| 39 | DG(16:0_22:5)      | 0.54  | (-0.29- 1.38) | 2.00E-01        | 2.63E-01        |
| 40 | DG(18:2_20:4)      | 0.65  | (-0.16- 1.47) | 1.17E-01        | 1.68E-01        |
| 41 | DG(16:0_22:6)      | 1.28  | ( 0.22- 2.36) | <b>1.82E-02</b> | <b>3.42E-02</b> |
| 42 | DG(18:1_22:5)      | 0.25  | (-0.54- 1.04) | 5.41E-01        | 6.11E-01        |
| 43 | DG(18:1_22:6)      | 1.42  | ( 0.41- 2.44) | <b>5.72E-03</b> | <b>1.29E-02</b> |
| 44 | DG(18:2_22:6)      | 1.39  | ( 0.34- 2.45) | <b>9.25E-03</b> | <b>1.91E-02</b> |
| 45 | TG(48:0) [NL-18:0] | -1.36 | (-2.19--0.52) | <b>1.56E-03</b> | <b>3.97E-03</b> |
| 46 | TG(48:1) [NL-16:1] | 0.79  | (-0.28- 1.86) | 1.49E-01        | 2.02E-01        |
| 47 | TG(48:1) [NL-18:1] | -0.47 | (-1.30- 0.36) | 2.65E-01        | 3.28E-01        |
| 48 | TG(48:2) [NL-14:0] | -0.80 | (-1.77- 0.19) | 1.12E-01        | 1.62E-01        |
| 49 | TG(48:2) [NL-14:1] | -0.98 | (-1.98- 0.03) | 5.60E-02        | 9.20E-02        |
| 50 | TG(48:2) [NL-16:1] | 0.02  | (-1.21- 1.26) | 9.81E-01        | 9.87E-01        |
| 51 | TG(48:2) [NL-18:2] | -1.03 | (-2.00--0.04) | <b>4.10E-02</b> | 7.02E-02        |
| 52 | TG(48:3) [NL-14:0] | -1.30 | (-2.36--0.22) | <b>1.81E-02</b> | <b>3.42E-02</b> |
| 53 | TG(48:3) [NL-16:1] | -1.01 | (-2.08- 0.08) | 7.04E-02        | 1.10E-01        |
| 54 | TG(48:3) [NL-18:3] | -1.57 | (-2.77--0.35) | <b>1.18E-02</b> | <b>2.35E-02</b> |
| 55 | TG(49:1) [NL-17:1] | 0.51  | (-0.31- 1.34) | 2.24E-01        | 2.86E-01        |
| 56 | TG(50:1) [NL-14:0] | -0.63 | (-1.35- 0.09) | 8.73E-02        | 1.31E-01        |
| 57 | TG(50:1) [NL-16:0] | 0.91  | ( 0.34- 1.48) | <b>1.82E-03</b> | <b>4.57E-03</b> |
| 58 | TG(50:1) [NL-18:1] | 0.79  | ( 0.25- 1.34) | <b>4.35E-03</b> | <b>1.00E-02</b> |
| 59 | TG(50:2) [NL-14:0] | -0.67 | (-1.20--0.13) | <b>1.48E-02</b> | <b>2.87E-02</b> |

|    |                    |       |               |                 |                 |
|----|--------------------|-------|---------------|-----------------|-----------------|
| 60 | TG(50:2) [NL-16:1] | 0.62  | (-0.05- 1.30) | 6.93E-02        | 1.09E-01        |
| 61 | TG(50:2) [NL-18:1] | 0.30  | (-0.29- 0.89) | 3.19E-01        | 3.82E-01        |
| 62 | TG(50:2) [NL-18:2] | 0.70  | ( 0.15- 1.25) | <b>1.24E-02</b> | <b>2.47E-02</b> |
| 63 | TG(50:3) [NL-14:0] | -0.59 | (-1.27- 0.10) | 9.24E-02        | 1.36E-01        |
| 64 | TG(50:3) [NL-14:1] | -0.52 | (-1.13- 0.10) | 1.03E-01        | 1.50E-01        |
| 65 | TG(50:3) [NL-16:1] | 0.56  | (-0.22- 1.34) | 1.60E-01        | 2.16E-01        |
| 66 | TG(50:3) [NL-18:2] | 0.19  | (-0.50- 0.89) | 5.87E-01        | 6.54E-01        |
| 67 | TG(50:3) [NL-18:3] | 0.33  | (-0.54- 1.21) | 4.63E-01        | 5.28E-01        |
| 68 | TG(50:4) [NL-14:0] | -0.87 | (-1.83- 0.09) | 7.51E-02        | 1.16E-01        |
| 69 | TG(50:4) [NL-18:3] | -0.63 | (-1.61- 0.36) | 2.10E-01        | 2.74E-01        |
| 70 | TG(50:4) [NL-20:4] | -0.65 | (-1.95- 0.67) | 3.32E-01        | 3.95E-01        |
| 71 | TG(51:1) [NL-17:0] | 0.63  | (-0.07- 1.35) | 7.91E-02        | 1.20E-01        |
| 72 | TG(51:2) [NL-15:0] | -0.67 | (-1.30--0.05) | <b>3.57E-02</b> | 6.26E-02        |
| 73 | TG(51:2) [NL-17:0] | 0.36  | (-0.28- 1.02) | 2.71E-01        | 3.31E-01        |
| 74 | TG(51:2) [NL-17:1] | 0.36  | (-0.27- 0.99) | 2.66E-01        | 3.28E-01        |
| 75 | TG(52:1) [NL-18:0] | 1.42  | ( 0.67- 2.17) | <b>1.98E-04</b> | <b>6.24E-04</b> |
| 76 | TG(52:1) [NL-18:1] | 1.47  | ( 0.75- 2.19) | <b>6.59E-05</b> | <b>2.40E-04</b> |
| 77 | TG(52:2) [NL-16:0] | 0.63  | ( 0.25- 1.02) | <b>1.26E-03</b> | <b>3.25E-03</b> |
| 78 | TG(52:2) [NL-18:2] | 0.56  | (-0.02- 1.14) | 5.71E-02        | 9.29E-02        |
| 79 | TG(52:3) [NL-16:1] | 0.24  | (-0.30- 0.78) | 3.93E-01        | 4.54E-01        |
| 80 | TG(52:3) [NL-18:2] | 0.57  | ( 0.15- 1.00) | <b>8.11E-03</b> | <b>1.70E-02</b> |
| 81 | TG(52:4) [NL-16:1] | 0.48  | (-0.21- 1.17) | 1.71E-01        | 2.28E-01        |
| 82 | TG(52:4) [NL-18:2] | 0.96  | ( 0.24- 1.69) | <b>9.34E-03</b> | <b>1.92E-02</b> |
| 83 | TG(52:4) [NL-18:3] | 0.37  | (-0.30- 1.04) | 2.77E-01        | 3.37E-01        |
| 84 | TG(52:5) [NL-18:3] | 0.02  | (-0.92- 0.97) | 9.60E-01        | 9.72E-01        |
| 85 | TG(52:5) [NL-20:4] | 0.56  | (-0.56- 1.70) | 3.30E-01        | 3.94E-01        |
| 86 | TG(52:5) [NL-20:5] | 1.08  | (-0.13- 2.31) | 8.11E-02        | 1.22E-01        |
| 87 | TG(53:2) [NL-18:1] | 0.68  | ( 0.04- 1.33) | <b>3.72E-02</b> | 6.49E-02        |
| 88 | TG(54:1) [NL-18:1] | 0.87  | ( 0.24- 1.51) | <b>6.65E-03</b> | <b>1.46E-02</b> |
| 89 | TG(54:2) [NL-18:0] | 1.30  | ( 0.64- 1.95) | <b>1.01E-04</b> | <b>3.50E-04</b> |
| 90 | TG(54:2) [NL-20:1] | 0.28  | (-0.46- 1.02) | 4.57E-01        | 5.22E-01        |
| 91 | TG(54:3) [NL-18:1] | 0.29  | (-0.24- 0.83) | 2.83E-01        | 3.43E-01        |
| 92 | TG(54:3) [NL-18:2] | 0.60  | ( 0.05- 1.14) | <b>3.19E-02</b> | 5.63E-02        |

|     |                      |       |               |                 |                 |
|-----|----------------------|-------|---------------|-----------------|-----------------|
| 93  | TG(54:4) [NL-18:2]   | 0.11  | (-0.49- 0.71) | 7.27E-01        | 7.82E-01        |
| 94  | TG(54:4) [NL-20:3]   | 0.66  | ( 0.01- 1.31) | <b>4.66E-02</b> | 7.84E-02        |
| 95  | TG(54:5) [NL-18:3]   | -0.12 | (-0.94- 0.70) | 7.70E-01        | 8.21E-01        |
| 96  | TG(54:5) [NL-20:4]   | 0.96  | ( 0.33- 1.59) | <b>2.65E-03</b> | <b>6.45E-03</b> |
| 97  | TG(54:6) [NL-18:3]   | -0.60 | (-1.69- 0.49) | 2.80E-01        | 3.39E-01        |
| 98  | TG(54:6) [NL-20:4]   | 1.11  | ( 0.32- 1.91) | <b>5.77E-03</b> | <b>1.30E-02</b> |
| 99  | TG(54:6) [NL-20:5]   | 1.00  | (-0.09- 2.09) | 7.14E-02        | 1.11E-01        |
| 100 | TG(54:6) [NL-22:6]   | 1.98  | ( 0.83- 3.15) | <b>7.51E-04</b> | <b>2.08E-03</b> |
| 101 | TG(54:7) [NL-20:5]   | 0.65  | (-0.57- 1.89) | 2.96E-01        | 3.57E-01        |
| 102 | TG(54:7) [NL-22:6]   | 1.13  | (-0.13- 2.39) | 7.81E-02        | 1.19E-01        |
| 103 | TG(56:6) [NL-20:4]   | 1.20  | ( 0.69- 1.71) | <b>3.67E-06</b> | <b>1.82E-05</b> |
| 104 | TG(56:6) [NL-22:5]   | 0.56  | (-0.07- 1.18) | 8.11E-02        | 1.22E-01        |
| 105 | TG(56:7) [NL-20:4]   | 0.87  | ( 0.23- 1.52) | <b>7.69E-03</b> | <b>1.63E-02</b> |
| 106 | TG(56:7) [NL-20:5]   | 0.46  | (-0.59- 1.52) | 3.89E-01        | 4.51E-01        |
| 107 | TG(56:7) [NL-22:5]   | 0.71  | (-0.02- 1.45) | 5.82E-02        | 9.34E-02        |
| 108 | TG(56:7) [NL-22:6]   | 1.96  | ( 0.93- 3.00) | <b>1.94E-04</b> | <b>6.16E-04</b> |
| 109 | TG(56:8) [NL-20:4]   | 0.74  | (-0.14- 1.64) | 9.96E-02        | 1.46E-01        |
| 110 | TG(56:8) [NL-20:5]   | 0.28  | (-0.90- 1.47) | 6.47E-01        | 7.09E-01        |
| 111 | TG(56:8) [NL-22:6]   | 1.74  | ( 0.59- 2.91) | <b>3.07E-03</b> | <b>7.27E-03</b> |
| 112 | TG(56:9) [NL-22:6]   | 0.92  | (-0.21- 2.05) | 1.10E-01        | 1.59E-01        |
| 113 | TG(58:10) [NL-22:6]  | 0.88  | (-0.23- 2.01) | 1.21E-01        | 1.73E-01        |
| 114 | TG(58:8) [NL-22:6]   | 1.42  | ( 0.39- 2.45) | <b>6.55E-03</b> | <b>1.45E-02</b> |
| 115 | TG(58:9) [NL-22:6]   | 1.22  | ( 0.13- 2.32) | <b>2.87E-02</b> | 5.13E-02        |
| 116 | TG(O-50:1) [NL-16:0] | -0.05 | (-0.61- 0.52) | 8.74E-01        | 9.08E-01        |
| 117 | TG(O-50:1) [NL-17:1] | 0.51  | (-0.31- 1.35) | 2.24E-01        | 2.86E-01        |
| 118 | TG(O-50:1) [NL-18:1] | -0.48 | (-1.10- 0.16) | 1.40E-01        | 1.94E-01        |
| 119 | TG(O-50:2) [NL-18:2] | -0.03 | (-0.58- 0.53) | 9.24E-01        | 9.44E-01        |
| 120 | TG(O-52:2) [NL-16:0] | -0.09 | (-0.85- 0.67) | 8.11E-01        | 8.54E-01        |
| 121 | TG(O-52:2) [NL-17:1] | 0.36  | (-0.27- 0.99) | 2.68E-01        | 3.30E-01        |
| 122 | TG(O-52:2) [NL-18:1] | -0.35 | (-1.13- 0.44) | 3.83E-01        | 4.45E-01        |
| 123 | TG(O-54:2) [NL-18:1] | 0.66  | ( 0.02- 1.30) | <b>4.41E-02</b> | 7.51E-02        |
| 124 | TG(O-54:4) [NL-17:1] | -0.07 | (-0.80- 0.66) | 8.43E-01        | 8.83E-01        |
| 125 | TG(O-54:4) [NL-18:2] | -0.11 | (-0.87- 0.66) | 7.82E-01        | 8.32E-01        |



|     |                   |       |               |                 |                 |
|-----|-------------------|-------|---------------|-----------------|-----------------|
| 126 | dhCer(d18:0/22:0) | 1.17  | ( 0.57- 1.78) | <b>1.51E-04</b> | <b>5.00E-04</b> |
| 127 | dhCer(d18:0/24:0) | 0.32  | (-0.24- 0.89) | 2.66E-01        | 3.28E-01        |
| 128 | dhCer(d18:0/24:1) | 1.68  | ( 1.01- 2.36) | <b>9.12E-07</b> | <b>4.92E-06</b> |
| 129 | Cer(d16:1/22:0)   | -0.55 | (-1.12- 0.02) | 6.04E-02        | 9.67E-02        |
| 130 | Cer(d16:1/23:0)   | -0.82 | (-1.46--0.19) | <b>1.15E-02</b> | <b>2.31E-02</b> |
| 131 | Cer(d16:1/24:0)   | -1.86 | (-2.45--1.26) | <b>2.60E-09</b> | <b>2.35E-08</b> |
| 132 | Cer(d16:1/24:1)   | -0.17 | (-0.76- 0.43) | 5.86E-01        | 6.54E-01        |
| 133 | Cer(d17:1/22:0)   | -1.12 | (-1.73--0.50) | <b>3.95E-04</b> | <b>1.18E-03</b> |
| 134 | Cer(d17:1/23:0)   | -1.10 | (-1.74--0.45) | <b>9.38E-04</b> | <b>2.53E-03</b> |
| 135 | Cer(d17:1/24:0)   | -2.00 | (-2.55--1.45) | <b>3.43E-12</b> | <b>8.23E-11</b> |
| 136 | Cer(d17:1/24:1)   | -1.06 | (-1.65--0.47) | <b>4.22E-04</b> | <b>1.24E-03</b> |
| 137 | Cer(d18:1/16:0)   | -0.73 | (-1.16--0.29) | <b>1.20E-03</b> | <b>3.14E-03</b> |
| 138 | Cer(d18:1/18:0)   | 2.06  | ( 1.42- 2.69) | <b>2.38E-10</b> | <b>3.14E-09</b> |
| 139 | Cer(d18:1/20:0)   | 0.35  | (-0.18- 0.89) | 1.95E-01        | 2.57E-01        |
| 140 | Cer(d18:1/22:0)   | 0.03  | (-0.42- 0.48) | 9.07E-01        | 9.30E-01        |
| 141 | Cer(d18:1/23:0)   | -0.31 | (-0.76- 0.15) | 1.91E-01        | 2.52E-01        |
| 142 | Cer(d18:1/24:0)   | -0.90 | (-1.34--0.46) | <b>7.06E-05</b> | <b>2.55E-04</b> |
| 143 | Cer(d18:1/24:1)   | 0.13  | (-0.38- 0.64) | 6.12E-01        | 6.77E-01        |
| 144 | Cer(d18:2/16:0)   | -0.19 | (-0.78- 0.41) | 5.31E-01        | 6.01E-01        |
| 145 | Cer(d18:2/22:0)   | -0.24 | (-0.78- 0.29) | 3.75E-01        | 4.37E-01        |
| 146 | Cer(d18:2/23:0)   | -0.42 | (-0.98- 0.14) | 1.44E-01        | 1.98E-01        |
| 147 | Cer(d18:2/24:0)   | -1.18 | (-1.70--0.66) | <b>1.13E-05</b> | <b>4.82E-05</b> |
| 148 | Cer(d18:2/24:1)   | 0.02  | (-0.53- 0.57) | 9.54E-01        | 9.70E-01        |
| 149 | Cer(d19:1/24:0)   | -1.18 | (-2.03--0.33) | <b>6.84E-03</b> | <b>1.49E-02</b> |
| 150 | Cer(d19:1/24:1)   | -0.24 | (-1.23- 0.75) | 6.30E-01        | 6.95E-01        |
| 151 | Cer(m18:0/22:0)   | 0.36  | (-0.40- 1.12) | 3.51E-01        | 4.14E-01        |
| 152 | Cer(m18:0/23:0)   | 0.52  | (-0.31- 1.36) | 2.19E-01        | 2.84E-01        |
| 153 | Cer(m18:0/24:0)   | -0.42 | (-1.17- 0.34) | 2.77E-01        | 3.37E-01        |
| 154 | Cer(m18:0/24:1)   | 1.23  | ( 0.39- 2.08) | <b>4.05E-03</b> | <b>9.38E-03</b> |
| 155 | Cer(m18:1/22:0)   | 0.56  | (-0.25- 1.37) | 1.73E-01        | 2.30E-01        |
| 156 | Cer(m18:1/23:0)   | 0.17  | (-0.69- 1.03) | 7.02E-01        | 7.62E-01        |
| 157 | Cer(m18:1/24:0)   | -0.58 | (-1.32- 0.17) | 1.31E-01        | 1.84E-01        |
| 158 | Cer(m18:1/24:1)   | 1.15  | ( 0.31- 2.00) | <b>7.18E-03</b> | <b>1.54E-02</b> |

|     |                               |       |               |                 |                 |
|-----|-------------------------------|-------|---------------|-----------------|-----------------|
| 159 | GM3(d18:1/18:0)               | -1.01 | (-1.51--0.50) | <b>1.09E-04</b> | <b>3.69E-04</b> |
| 160 | GM3(d18:1/22:0)               | -2.05 | (-2.63--1.47) | <b>1.54E-11</b> | <b>2.96E-10</b> |
| 161 | GM3(d18:1/24:0)               | -3.09 | (-3.67--2.51) | <b>3.54E-23</b> | <b>8.49E-21</b> |
| 162 | GM3(d18:1/24:1)               | -1.70 | (-2.26--1.14) | <b>4.39E-09</b> | <b>3.70E-08</b> |
| 163 | HexCer(d16:1/22:0)            | -1.66 | (-2.26--1.05) | <b>1.12E-07</b> | <b>6.87E-07</b> |
| 164 | HexCer(d16:1/24:0)            | -3.08 | (-3.70--2.46) | <b>9.70E-21</b> | <b>9.31E-19</b> |
| 165 | HexCer(d18:1/16:0)            | -1.29 | (-1.75--0.83) | <b>6.17E-08</b> | <b>3.97E-07</b> |
| 166 | HexCer(d18:1/18:0)            | -1.47 | (-2.03--0.91) | <b>3.56E-07</b> | <b>2.06E-06</b> |
| 167 | HexCer(d18:1/20:0)            | -1.84 | (-2.37--1.31) | <b>3.17E-11</b> | <b>5.85E-10</b> |
| 168 | HexCer(d18:1/22:0)            | -1.91 | (-2.37--1.44) | <b>6.16E-15</b> | <b>2.69E-13</b> |
| 169 | HexCer(d18:1/24:0)            | -2.58 | (-3.05--2.11) | <b>1.77E-24</b> | <b>8.48E-22</b> |
| 170 | HexCer(d18:1/24:1)            | -1.70 | (-2.22--1.17) | <b>5.53E-10</b> | <b>6.33E-09</b> |
| 171 | Hex2Cer(d16:1/16:0)           | -1.19 | (-1.78--0.60) | <b>8.56E-05</b> | <b>3.07E-04</b> |
| 172 | Hex2Cer(d18:1/16:0)           | -1.53 | (-2.03--1.04) | <b>2.47E-09</b> | <b>2.28E-08</b> |
| 173 | Hex2Cer(d18:1/22:0)           | -1.69 | (-2.21--1.17) | <b>4.47E-10</b> | <b>5.24E-09</b> |
| 174 | Hex2Cer(d18:1/24:1)           | -1.63 | (-2.19--1.08) | <b>1.53E-08</b> | <b>1.10E-07</b> |
| 175 | Hex2Cer(d18:2/16:0)           | -0.74 | (-1.26--0.22) | <b>5.12E-03</b> | <b>1.17E-02</b> |
| 176 | Hex3Cer(d18:1/16:0)           | -1.08 | (-1.47--0.68) | <b>1.34E-07</b> | <b>8.16E-07</b> |
| 177 | Hex3Cer(d18:1/22:0)           | -1.49 | (-2.06--0.92) | <b>4.93E-07</b> | <b>2.75E-06</b> |
| 178 | Hex3Cer(d18:1/24:0)           | -1.62 | (-2.16--1.07) | <b>1.04E-08</b> | <b>8.05E-08</b> |
| 179 | Hex3Cer(d18:1/24:1)           | -1.20 | (-1.72--0.68) | <b>8.14E-06</b> | <b>3.55E-05</b> |
| 180 | SM(d17:1/14:0)                | -1.71 | (-2.25--1.17) | <b>1.07E-09</b> | <b>1.11E-08</b> |
| 181 | SM(d18:0/14:0)                | -0.71 | (-1.21--0.21) | <b>5.93E-03</b> | <b>1.33E-02</b> |
| 182 | SM(d18:1/14:0)/SM(d16:1/16:0) | -0.82 | (-1.27--0.37) | <b>3.86E-04</b> | <b>1.16E-03</b> |
| 183 | SM(d18:2/14:0)                | 0.35  | (-0.14- 0.84) | 1.62E-01        | 2.18E-01        |
| 184 | SM(d17:1/16:0)                | -1.29 | (-1.72--0.86) | <b>5.52E-09</b> | <b>4.57E-08</b> |
| 185 | SM(d18:1/16:0)                | -1.33 | (-1.84--0.82) | <b>4.31E-07</b> | <b>2.44E-06</b> |
| 186 | SM(d18:2/16:0)                | 0.16  | (-0.22- 0.54) | 4.09E-01        | 4.71E-01        |
| 187 | SM(34:3)                      | 0.37  | (-0.08- 0.82) | 1.09E-01        | 1.59E-01        |
| 188 | SM(d18:2/17:0)                | -0.25 | (-0.69- 0.18) | 2.53E-01        | 3.17E-01        |
| 189 | SM(35:2) (b)                  | -1.39 | (-1.94--0.83) | <b>1.32E-06</b> | <b>7.02E-06</b> |
| 190 | SM(d18:1/18:0)/SM(d16:1/20:0) | 0.38  | (-0.10- 0.87) | 1.22E-01        | 1.73E-01        |
| 191 | SM(d18:2/18:1)                | 0.44  | (-0.01- 0.89) | 5.67E-02        | 9.29E-02        |

|     |                                      |       |               |                 |                 |
|-----|--------------------------------------|-------|---------------|-----------------|-----------------|
| 192 | SM(37:1)                             | -0.65 | (-1.17--0.13) | <b>1.39E-02</b> | <b>2.74E-02</b> |
| 193 | SM(37:2)                             | -1.00 | (-1.58--0.43) | <b>6.68E-04</b> | <b>1.90E-03</b> |
| 194 | SM(d18:1/20:0)/SM(d16:1/22:0)        | -0.67 | (-1.06--0.27) | <b>1.15E-03</b> | <b>3.03E-03</b> |
| 195 | SM(d18:2/20:0)                       | -0.28 | (-0.76- 0.20) | 2.47E-01        | 3.11E-01        |
| 196 | SM(38:3) (a)                         | 0.56  | ( 0.09- 1.03) | <b>2.01E-02</b> | <b>3.73E-02</b> |
| 197 | SM(38:3) (b)                         | -0.63 | (-1.15--0.10) | <b>1.98E-02</b> | <b>3.70E-02</b> |
| 198 | SM(d16:1/23:0)/SM(d17:1/22:0)        | -0.96 | (-1.40--0.52) | <b>2.37E-05</b> | <b>9.27E-05</b> |
| 199 | SM(d18:1/22:0)/SM(d16:1/24:0)        | -0.54 | (-0.99--0.10) | <b>1.59E-02</b> | <b>3.06E-02</b> |
| 200 | SM(d16:1/24:1)                       | -0.58 | (-1.06--0.10) | <b>1.72E-02</b> | <b>3.26E-02</b> |
| 201 | SM(d18:2/22:0)                       | -0.70 | (-1.13--0.26) | <b>1.83E-03</b> | <b>4.57E-03</b> |
| 202 | SM(40:3) (a)                         | -0.01 | (-0.47- 0.46) | 9.76E-01        | 9.84E-01        |
| 203 | SM(40:3) (b)                         | -0.77 | (-1.29--0.25) | <b>3.79E-03</b> | <b>8.88E-03</b> |
| 204 | SM(41:0)                             | -0.37 | (-0.77- 0.04) | 7.80E-02        | 1.19E-01        |
| 205 | SM(41:1)                             | -0.63 | (-1.03--0.22) | <b>2.50E-03</b> | <b>6.17E-03</b> |
| 206 | SM(d17:1/24:1)                       | -0.84 | (-1.27--0.41) | <b>1.47E-04</b> | <b>4.89E-04</b> |
| 207 | SM(d18:2/23:0)                       | -0.86 | (-1.27--0.45) | <b>4.75E-05</b> | <b>1.78E-04</b> |
| 208 | SM(d18:1/24:0)                       | -1.44 | (-1.87--1.00) | <b>1.67E-10</b> | <b>2.39E-09</b> |
| 209 | SM(d18:1/24:1)                       | -0.55 | (-1.06--0.04) | <b>3.34E-02</b> | 5.87E-02        |
| 210 | SM(d18:2/24:0)                       | -1.43 | (-1.83--1.04) | <b>2.62E-12</b> | <b>6.63E-11</b> |
| 211 | SM(43:1)                             | -1.60 | (-2.05--1.15) | <b>6.52E-12</b> | <b>1.42E-10</b> |
| 212 | SM(44:1)                             | -1.57 | (-1.97--1.18) | <b>2.98E-14</b> | <b>1.19E-12</b> |
| 213 | SM(44:2)                             | -1.12 | (-1.58--0.65) | <b>3.68E-06</b> | <b>1.82E-05</b> |
| 214 | SM(44:3) (a)                         | -1.38 | (-1.82--0.94) | <b>1.42E-09</b> | <b>1.42E-08</b> |
| 215 | LPC(14:0) [sn2]                      | -0.46 | (-1.20- 0.28) | 2.22E-01        | 2.86E-01        |
| 216 | LPC(14:0) [sn1]                      | -0.19 | (-0.91- 0.52) | 5.95E-01        | 6.62E-01        |
| 217 | LPC(15:0) [sn2]                      | -1.36 | (-1.94--0.77) | <b>7.01E-06</b> | <b>3.11E-05</b> |
| 218 | LPC(15:0) [sn1]                      | -1.15 | (-1.68--0.62) | <b>2.41E-05</b> | <b>9.34E-05</b> |
| 219 | LPC(16:0) [sn2]                      | 0.07  | (-0.36- 0.49) | 7.57E-01        | 8.11E-01        |
| 220 | LPC(16:0) [sn1]                      | 0.31  | (-0.19- 0.81) | 2.25E-01        | 2.86E-01        |
| 221 | LPC(16:1) [sn2]                      | 0.39  | (-0.30- 1.08) | 2.70E-01        | 3.30E-01        |
| 222 | LPC(16:1) [sn1]                      | 0.52  | (-0.08- 1.12) | 9.12E-02        | 1.36E-01        |
| 223 | LPC(15-MHDA) [sn2]                   | -1.37 | (-2.07--0.66) | <b>1.82E-04</b> | <b>5.86E-04</b> |
| 224 | LPC(15-MHDA) [sn1] / LPC(17:0) [sn2] | -1.20 | (-1.79--0.60) | <b>1.06E-04</b> | <b>3.64E-04</b> |

|     |                                           |       |               |                 |                 |
|-----|-------------------------------------------|-------|---------------|-----------------|-----------------|
| 225 | LPC(17:0) [sn1]                           | -0.87 | (-1.35--0.40) | <b>3.09E-04</b> | <b>9.45E-04</b> |
| 226 | LPC(17:1) [sn1] (a) / LPC(17:1) [sn2] (b) | -0.82 | (-1.37--0.27) | <b>3.48E-03</b> | <b>8.20E-03</b> |
| 227 | LPC(18:0) [sn2]                           | 0.00  | (-0.44- 0.44) | 9.99E-01        | 9.99E-01        |
| 228 | LPC(18:0) [sn1]                           | 0.03  | (-0.42- 0.48) | 8.87E-01        | 9.16E-01        |
| 229 | LPC(18:1) [sn2]                           | -0.48 | (-0.98- 0.01) | 5.70E-02        | 9.29E-02        |
| 230 | LPC(18:1) [sn1]                           | -0.38 | (-0.82- 0.06) | 9.10E-02        | 1.36E-01        |
| 231 | LPC(18:2) [sn2]                           | -0.47 | (-0.93--0.00) | <b>4.83E-02</b> | 8.09E-02        |
| 232 | LPC(18:2) [sn1]                           | -0.25 | (-0.77- 0.27) | 3.45E-01        | 4.09E-01        |
| 233 | LPC(18:3) [sn2] (a)                       | -1.27 | (-1.94--0.60) | <b>2.17E-04</b> | <b>6.76E-04</b> |
| 234 | LPC(18:3) [sn1] (a)/LPC(18:3) [sn2] (b)   | -0.71 | (-1.39--0.01) | <b>4.57E-02</b> | 7.75E-02        |
| 235 | LPC(18:3) (a) [sn1] [104_sn1]             | -0.71 | (-1.42- 0.01) | 5.20E-02        | 8.64E-02        |
| 236 | LPC(19:0) [sn1] (a) / LPC(19:0) [sn2] (b) | -1.53 | (-1.97--1.08) | <b>3.81E-11</b> | <b>6.53E-10</b> |
| 237 | LPC(20:0) [sn1]                           | -1.62 | (-2.04--1.19) | <b>3.01E-13</b> | <b>9.64E-12</b> |
| 238 | LPC(20:1) [sn2]                           | -0.59 | (-1.03--0.16) | <b>7.98E-03</b> | <b>1.69E-02</b> |
| 239 | LPC(20:1) [sn1]                           | -0.61 | (-1.05--0.17) | <b>6.96E-03</b> | <b>1.50E-02</b> |
| 240 | LPC(20:2) [sn2]                           | -0.81 | (-1.29--0.33) | <b>1.00E-03</b> | <b>2.67E-03</b> |
| 241 | LPC(20:2) [sn1]                           | -0.52 | (-0.97--0.06) | <b>2.62E-02</b> | <b>4.76E-02</b> |
| 242 | LPC(20:3) [sn2]                           | 1.22  | ( 0.60- 1.85) | <b>1.08E-04</b> | <b>3.67E-04</b> |
| 243 | LPC(20:3) [sn1]                           | 1.45  | ( 0.79- 2.11) | <b>1.76E-05</b> | <b>7.12E-05</b> |
| 244 | LPC(20:3) [104_sn1]                       | 1.61  | ( 0.94- 2.28) | <b>2.82E-06</b> | <b>1.47E-05</b> |
| 245 | LPC(20:4) [sn2]                           | 0.85  | ( 0.36- 1.35) | <b>7.28E-04</b> | <b>2.04E-03</b> |
| 246 | LPC(20:4) [sn1]                           | 1.32  | ( 0.78- 1.87) | <b>1.66E-06</b> | <b>8.77E-06</b> |
| 247 | LPC(20:5) [sn2]                           | 0.19  | (-0.84- 1.24) | 7.14E-01        | 7.73E-01        |
| 248 | LPC(20:5) [sn1]                           | 0.44  | (-0.62- 1.51) | 4.18E-01        | 4.82E-01        |
| 249 | LPC(22:4) [sn2]                           | -0.37 | (-0.97- 0.23) | 2.25E-01        | 2.86E-01        |
| 250 | LPC(22:4) [sn1]                           | 0.13  | (-0.45- 0.72) | 6.61E-01        | 7.21E-01        |
| 251 | LPC(22:5) [sn2] (n3)                      | -0.82 | (-1.41--0.23) | <b>6.89E-03</b> | <b>1.50E-02</b> |
| 252 | LPC(22:5) [sn1] (n3)/LPC(22:5) [sn2] (n6) | -0.64 | (-1.20--0.08) | <b>2.59E-02</b> | <b>4.72E-02</b> |
| 253 | LPC(22:5) [sn1] (n6)                      | -0.40 | (-1.13- 0.34) | 2.89E-01        | 3.49E-01        |
| 254 | LPC(22:5) (n3) [sn1] [104_sn1]            | -0.51 | (-1.17- 0.14) | 1.26E-01        | 1.78E-01        |
| 255 | LPC(22:6) [sn2]                           | -0.57 | (-1.16- 0.02) | 5.76E-02        | 9.31E-02        |
| 256 | LPC(22:6) [sn1]                           | -0.08 | (-0.70- 0.54) | 7.99E-01        | 8.45E-01        |
| 257 | LPC(O-16:0)                               | -0.26 | (-0.68- 0.16) | 2.31E-01        | 2.92E-01        |

|     |                 |       |               |                 |                 |
|-----|-----------------|-------|---------------|-----------------|-----------------|
| 258 | LPC(O-18:0)     | -1.04 | (-1.55--0.52) | <b>8.66E-05</b> | <b>3.08E-04</b> |
| 259 | LPC(O-18:1)     | 0.51  | ( 0.08- 0.94) | <b>2.06E-02</b> | <b>3.82E-02</b> |
| 260 | LPC(O-20:0)     | -1.71 | (-2.19--1.22) | <b>1.22E-11</b> | <b>2.55E-10</b> |
| 261 | LPC(O-20:1)     | 0.46  | (-0.35- 1.27) | 2.64E-01        | 3.28E-01        |
| 262 | LPC(O-22:0)     | -2.36 | (-2.82--1.89) | <b>9.14E-22</b> | <b>1.10E-19</b> |
| 263 | LPC(O-22:1)     | -1.65 | (-2.14--1.15) | <b>1.69E-10</b> | <b>2.39E-09</b> |
| 264 | LPC(O-24:0)     | -2.90 | (-3.46--2.35) | <b>1.39E-22</b> | <b>2.23E-20</b> |
| 265 | LPC(O-24:1)     | -2.37 | (-2.90--1.84) | <b>1.45E-17</b> | <b>1.16E-15</b> |
| 266 | LPC(O-24:2)     | -1.90 | (-2.45--1.33) | <b>8.94E-11</b> | <b>1.39E-09</b> |
| 267 | LPC(P-16:0)     | 0.42  | (-0.03- 0.88) | 6.77E-02        | 1.07E-01        |
| 268 | LPC(P-18:0)     | 0.35  | (-0.09- 0.79) | 1.15E-01        | 1.65E-01        |
| 269 | LPC(P-18:1)     | 0.85  | ( 0.30- 1.42) | <b>2.74E-03</b> | <b>6.59E-03</b> |
| 270 | LPC(P-20:0)     | -0.75 | (-1.29--0.20) | <b>7.43E-03</b> | <b>1.59E-02</b> |
| 271 | LPE(16:0) [sn2] | -0.54 | (-1.02--0.06) | <b>2.86E-02</b> | 5.13E-02        |
| 272 | LPE(16:0) [sn1] | -0.39 | (-0.85- 0.06) | 9.23E-02        | 1.36E-01        |
| 273 | LPE(18:0) [sn2] | 0.26  | (-0.19- 0.71) | 2.50E-01        | 3.14E-01        |
| 274 | LPE(18:0) [sn1] | 0.44  | ( 0.02- 0.87) | <b>4.07E-02</b> | 7.00E-02        |
| 275 | LPE(18:1) [sn2] | -0.73 | (-1.25--0.21) | <b>6.51E-03</b> | <b>1.45E-02</b> |
| 276 | LPE(18:1) [sn1] | -0.69 | (-1.20--0.18) | <b>8.03E-03</b> | <b>1.69E-02</b> |
| 277 | LPE(18:2) [sn2] | -0.77 | (-1.40--0.14) | <b>1.63E-02</b> | <b>3.14E-02</b> |
| 278 | LPE(18:2) [sn1] | -0.81 | (-1.45--0.16) | <b>1.44E-02</b> | <b>2.82E-02</b> |
| 279 | LPE(20:4) [sn1] | 0.58  | ( 0.07- 1.10) | <b>2.48E-02</b> | <b>4.54E-02</b> |
| 280 | LPE(22:6) [sn2] | -0.22 | (-0.77- 0.34) | 4.48E-01        | 5.14E-01        |
| 281 | LPE(22:6) [sn1] | -0.23 | (-0.83- 0.36) | 4.42E-01        | 5.07E-01        |
| 282 | PC(28:0)        | -2.43 | (-3.46--1.39) | <b>6.79E-06</b> | <b>3.08E-05</b> |
| 283 | PC(14:0_16:0)   | -1.92 | (-2.60--1.24) | <b>5.84E-08</b> | <b>3.84E-07</b> |
| 284 | PC(31:0) (a)    | -2.98 | (-3.98--1.97) | <b>1.59E-08</b> | <b>1.12E-07</b> |
| 285 | PC(31:0) (b)    | -2.16 | (-2.75--1.58) | <b>1.60E-12</b> | <b>4.27E-11</b> |
| 286 | PC(31:1)        | -2.30 | (-3.15--1.45) | <b>1.79E-07</b> | <b>1.06E-06</b> |
| 287 | PC(16:0_16:0)   | -0.54 | (-1.01--0.06) | <b>2.77E-02</b> | 5.01E-02        |
| 288 | PC(32:1)        | -0.58 | (-1.37- 0.21) | 1.51E-01        | 2.04E-01        |
| 289 | PC(32:2)        | -1.33 | (-1.97--0.69) | <b>5.63E-05</b> | <b>2.06E-04</b> |
| 290 | PC(33:0) (a)    | -2.12 | (-2.83--1.40) | <b>1.22E-08</b> | <b>9.14E-08</b> |

|     |                   |       |               |                 |                 |
|-----|-------------------|-------|---------------|-----------------|-----------------|
| 291 | PC(33:0) (b)      | -1.66 | (-2.19--1.12) | <b>2.20E-09</b> | <b>2.07E-08</b> |
| 292 | PC(33:1)          | -2.23 | (-2.90--1.55) | <b>2.77E-10</b> | <b>3.50E-09</b> |
| 293 | PC(33:2)          | -2.10 | (-2.70--1.51) | <b>1.37E-11</b> | <b>2.74E-10</b> |
| 294 | PC(16:0_18:0)     | -0.91 | (-1.30--0.51) | <b>7.79E-06</b> | <b>3.43E-05</b> |
| 295 | PC(16:0_18:1)     | -0.96 | (-1.48--0.43) | <b>3.81E-04</b> | <b>1.15E-03</b> |
| 296 | PC(16:0_18:2)     | -0.27 | (-0.56- 0.01) | 6.26E-02        | 9.95E-02        |
| 297 | PC(16:1_18:2)     | -0.70 | (-1.29--0.10) | <b>2.18E-02</b> | <b>4.03E-02</b> |
| 298 | PC(16:0_18:3) (a) | -1.50 | (-2.13--0.87) | <b>3.82E-06</b> | <b>1.87E-05</b> |
| 299 | PC(14:0_20:4)     | -0.59 | (-1.32- 0.14) | 1.15E-01        | 1.65E-01        |
| 300 | PC(34:5)          | -0.85 | (-1.97- 0.29) | 1.45E-01        | 1.99E-01        |
| 301 | PC(15-MHDA_18:1)  | -2.41 | (-3.16--1.66) | <b>7.36E-10</b> | <b>8.21E-09</b> |
| 302 | PC(17:0_18:1)     | -1.88 | (-2.36--1.39) | <b>1.04E-13</b> | <b>3.57E-12</b> |
| 303 | PC(15-MHDA_18:2)  | -1.74 | (-2.51--0.97) | <b>1.13E-05</b> | <b>4.82E-05</b> |
| 304 | PC(17:0_18:2)     | -1.47 | (-1.98--0.96) | <b>2.43E-08</b> | <b>1.67E-07</b> |
| 305 | PC(17:1_18:2)     | -1.07 | (-1.58--0.55) | <b>5.63E-05</b> | <b>2.06E-04</b> |
| 306 | PC(15:0_20:3)     | -0.55 | (-0.79--0.30) | <b>1.27E-05</b> | <b>5.33E-05</b> |
| 307 | PC(15:0_20:4)     | -1.25 | (-1.91--0.59) | <b>2.44E-04</b> | <b>7.52E-04</b> |
| 308 | PC(35:5)          | -1.32 | (-2.49--0.13) | <b>3.04E-02</b> | 5.41E-02        |
| 309 | PC(36:0)          | 0.99  | ( 0.41- 1.58) | <b>8.01E-04</b> | <b>2.20E-03</b> |
| 310 | PC(18:0_18:1)     | -1.19 | (-1.72--0.65) | <b>1.53E-05</b> | <b>6.23E-05</b> |
| 311 | PC(18:0_18:2)     | -0.49 | (-0.99- 0.02) | 6.14E-02        | 9.79E-02        |
| 312 | PC(16:0_20:3) (a) | -1.12 | (-1.68--0.56) | <b>9.06E-05</b> | <b>3.20E-04</b> |
| 313 | PC(16:0_20:3) (b) | 0.86  | ( 0.14- 1.59) | <b>1.96E-02</b> | <b>3.67E-02</b> |
| 314 | PC(18:2_18:2)     | -2.25 | (-2.92--1.58) | <b>1.52E-10</b> | <b>2.28E-09</b> |
| 315 | PC(16:1_20:4)     | -0.31 | (-0.95- 0.33) | 3.45E-01        | 4.09E-01        |
| 316 | PC(16:0_20:5)     | -0.01 | (-1.15- 1.15) | 9.87E-01        | 9.92E-01        |
| 317 | PC(36:6)          | -2.02 | (-2.79--1.24) | <b>5.96E-07</b> | <b>3.29E-06</b> |
| 318 | PC(15-MHDA_20:4)  | -0.65 | (-1.39- 0.09) | 8.52E-02        | 1.28E-01        |
| 319 | PC(17:0_20:4)     | -0.37 | (-0.98- 0.24) | 2.35E-01        | 2.97E-01        |
| 320 | PC(15:0_22:6)     | -2.61 | (-3.31--1.91) | <b>9.22E-13</b> | <b>2.60E-11</b> |
| 321 | PC(38:2)          | -0.99 | (-1.42--0.56) | <b>8.38E-06</b> | <b>3.62E-05</b> |
| 322 | PC(18:0_20:3)     | 1.40  | ( 0.74- 2.08) | <b>3.78E-05</b> | <b>1.43E-04</b> |
| 323 | PC(18:1_20:3)     | -0.41 | (-1.00- 0.18) | 1.69E-01        | 2.26E-01        |

|     |                    |       |               |                 |                 |
|-----|--------------------|-------|---------------|-----------------|-----------------|
| 324 | PC(38:4) (b)       | -0.80 | (-1.46--0.15) | <b>1.65E-02</b> | <b>3.15E-02</b> |
| 325 | PC(18:0_20:4)      | 0.92  | ( 0.32- 1.52) | <b>2.72E-03</b> | <b>6.56E-03</b> |
| 326 | PC(38:5) (a)       | -0.99 | (-1.47--0.52) | <b>4.99E-05</b> | <b>1.86E-04</b> |
| 327 | PC(38:5) (b)       | -1.08 | (-1.77--0.38) | <b>2.72E-03</b> | <b>6.56E-03</b> |
| 328 | PC(38:6) (a)       | -0.84 | (-1.41--0.27) | <b>3.92E-03</b> | <b>9.14E-03</b> |
| 329 | PC(16:0_22:6)      | -1.00 | (-1.59--0.40) | <b>1.21E-03</b> | <b>3.15E-03</b> |
| 330 | PC(18:2_20:5)      | -1.44 | (-2.37--0.51) | <b>2.64E-03</b> | <b>6.45E-03</b> |
| 331 | PC(16:1_22:6)      | -1.51 | (-2.15--0.86) | <b>6.89E-06</b> | <b>3.09E-05</b> |
| 332 | PC(38:7)(c)        | -1.55 | (-2.11--0.99) | <b>8.20E-08</b> | <b>5.11E-07</b> |
| 333 | PC(39:5)(a)        | -2.54 | (-3.32--1.76) | <b>3.76E-10</b> | <b>4.63E-09</b> |
| 334 | PC(39:5)(b)        | -2.23 | (-2.92--1.53) | <b>8.17E-10</b> | <b>8.92E-09</b> |
| 335 | PC(15-MHDA_22:6)   | -2.51 | (-3.27--1.75) | <b>2.42E-10</b> | <b>3.14E-09</b> |
| 336 | PC(17:0_22:6)      | -1.97 | (-2.66--1.26) | <b>6.49E-08</b> | <b>4.10E-07</b> |
| 337 | PC(18:0_22:5) (n6) | -1.18 | (-1.89--0.47) | <b>1.26E-03</b> | <b>3.25E-03</b> |
| 338 | PC(18:0_22:6)      | -0.57 | (-1.24- 0.11) | 9.85E-02        | 1.45E-01        |
| 339 | PC(40:7) (a)       | -1.17 | (-1.77--0.56) | <b>1.68E-04</b> | <b>5.51E-04</b> |
| 340 | PC(18:1_22:6) (a)  | -1.58 | (-2.09--1.06) | <b>3.73E-09</b> | <b>3.19E-08</b> |
| 341 | PC(40:8)           | -1.59 | (-2.09--1.08) | <b>1.66E-09</b> | <b>1.62E-08</b> |
| 342 | PC(44:12)          | -2.16 | (-3.16--1.15) | <b>3.40E-05</b> | <b>1.29E-04</b> |
| 343 | PC(O-16:0/16:0)    | -0.70 | (-1.11--0.29) | <b>7.75E-04</b> | <b>2.14E-03</b> |
| 344 | PC(O-32:1)         | -0.77 | (-1.29--0.24) | <b>4.50E-03</b> | <b>1.03E-02</b> |
| 345 | PC(O-34:1)         | -0.75 | (-1.15--0.34) | <b>3.53E-04</b> | <b>1.07E-03</b> |
| 346 | PC(O-34:2)         | -1.75 | (-2.33--1.17) | <b>6.44E-09</b> | <b>5.19E-08</b> |
| 347 | PC(O-34:4)         | -0.55 | (-1.47- 0.39) | 2.49E-01        | 3.12E-01        |
| 348 | PC(O-35:4)         | -0.61 | (-1.42- 0.20) | 1.40E-01        | 1.94E-01        |
| 349 | PC(O-36:0)         | -1.21 | (-1.68--0.74) | <b>6.03E-07</b> | <b>3.29E-06</b> |
| 350 | PC(O-18:0/18:1)    | -1.41 | (-1.86--0.96) | <b>1.69E-09</b> | <b>1.62E-08</b> |
| 351 | PC(O-18:1/18:1)    | -1.13 | (-1.56--0.70) | <b>3.79E-07</b> | <b>2.16E-06</b> |
| 352 | PC(O-18:0/18:2)    | -2.08 | (-2.63--1.54) | <b>3.31E-13</b> | <b>9.92E-12</b> |
| 353 | PC(O-18:1/18:2)    | -1.25 | (-1.77--0.73) | <b>3.42E-06</b> | <b>1.75E-05</b> |
| 354 | PC(O-16:0/20:3)    | -0.28 | (-0.79- 0.22) | 2.69E-01        | 3.30E-01        |
| 355 | PC(O-16:0/20:4)    | -0.12 | (-0.62- 0.39) | 6.47E-01        | 7.09E-01        |
| 356 | PC(O-36:5)         | -0.85 | (-1.79- 0.09) | 7.70E-02        | 1.18E-01        |

|     |                     |       |               |                 |                 |
|-----|---------------------|-------|---------------|-----------------|-----------------|
| 357 | PC(O-18:0/20:4)     | -0.45 | (-0.93- 0.04) | 7.33E-02        | 1.14E-01        |
| 358 | PC(O-38:5)          | -0.05 | (-0.49- 0.40) | 8.37E-01        | 8.79E-01        |
| 359 | PC(O-16:0/22:6)     | -0.05 | (-0.69- 0.61) | 8.91E-01        | 9.18E-01        |
| 360 | PC(O-40:5)          | -0.82 | (-1.29--0.35) | <b>6.74E-04</b> | <b>1.90E-03</b> |
| 361 | PC(O-18:0/22:6)     | -0.57 | (-1.10--0.02) | <b>4.07E-02</b> | 7.00E-02        |
| 362 | PC(O-40:7) (a)      | 0.03  | (-0.58- 0.65) | 9.22E-01        | 9.44E-01        |
| 363 | PC(P-16:0/14:0)     | -1.12 | (-1.68--0.56) | <b>1.06E-04</b> | <b>3.64E-04</b> |
| 364 | PC(P-16:0/16:0)     | -0.62 | (-1.10--0.14) | <b>1.16E-02</b> | <b>2.32E-02</b> |
| 365 | PC(P-16:0/16:1)     | -0.51 | (-1.07- 0.06) | 8.08E-02        | 1.22E-01        |
| 366 | PC(P-16:0/18:0)     | -1.09 | (-1.46--0.72) | <b>1.37E-08</b> | <b>1.01E-07</b> |
| 367 | PC(P-16:0/18:1)     | -1.11 | (-1.62--0.60) | <b>2.15E-05</b> | <b>8.53E-05</b> |
| 368 | PC(P-16:0/18:2)     | -0.93 | (-1.49--0.37) | <b>1.10E-03</b> | <b>2.91E-03</b> |
| 369 | PC(P-16:0/18:3)     | -1.43 | (-2.04--0.83) | <b>4.49E-06</b> | <b>2.11E-05</b> |
| 370 | PC(P-35:2) (a)      | -1.94 | (-2.77--1.11) | <b>6.24E-06</b> | <b>2.85E-05</b> |
| 371 | PC(P-35:2) (b)      | -1.55 | (-2.24--0.86) | <b>1.30E-05</b> | <b>5.41E-05</b> |
| 372 | PC(P-15:0/20:4) (b) | -0.41 | (-1.06- 0.23) | 2.09E-01        | 2.74E-01        |
| 373 | PC(P-18:1/18:1)     | -1.10 | (-1.59--0.61) | <b>1.35E-05</b> | <b>5.58E-05</b> |
| 374 | PC(P-18:0/18:2)     | -1.74 | (-2.29--1.19) | <b>9.23E-10</b> | <b>9.84E-09</b> |
| 375 | PC(P-16:0/20:4)     | 0.45  | (-0.13- 1.03) | 1.25E-01        | 1.77E-01        |
| 376 | PC(P-16:0/20:5)     | -0.26 | (-1.26- 0.74) | 6.04E-01        | 6.70E-01        |
| 377 | PC(P-17:0/20:4) (a) | -0.92 | (-1.67--0.17) | <b>1.68E-02</b> | <b>3.19E-02</b> |
| 378 | PC(P-17:0/20:4) (b) | -0.21 | (-0.91- 0.49) | 5.49E-01        | 6.18E-01        |
| 379 | PC(P-18:0/20:4)     | -0.04 | (-0.59- 0.51) | 8.87E-01        | 9.16E-01        |
| 380 | PC(P-38:5) (a)      | 0.26  | (-0.31- 0.83) | 3.69E-01        | 4.31E-01        |
| 381 | PC(P-38:5) (b)      | -0.72 | (-1.27--0.17) | <b>1.08E-02</b> | <b>2.21E-02</b> |
| 382 | PC(P-16:0/22:6)     | -0.11 | (-0.79- 0.58) | 7.57E-01        | 8.11E-01        |
| 383 | PC(P-20:0/20:4)     | -0.42 | (-0.99- 0.15) | 1.48E-01        | 2.01E-01        |
| 384 | PC(P-40:5) (b)      | -0.69 | (-1.23--0.16) | <b>1.13E-02</b> | <b>2.28E-02</b> |
| 385 | PC(P-18:0/22:6)     | -0.48 | (-1.13- 0.18) | 1.53E-01        | 2.06E-01        |
| 386 | PE(16:0_16:1)       | -0.27 | (-1.36- 0.84) | 6.33E-01        | 6.97E-01        |
| 387 | PE(16:0_18:1)       | -0.02 | (-0.76- 0.71) | 9.47E-01        | 9.65E-01        |
| 388 | PE(16:0_18:2)       | -0.07 | (-0.90- 0.76) | 8.63E-01        | 9.01E-01        |
| 389 | PE(16:1_18:2)       | -0.65 | (-1.62- 0.33) | 1.91E-01        | 2.52E-01        |



|     |                    |       |               |                 |                 |
|-----|--------------------|-------|---------------|-----------------|-----------------|
| 390 | PE(16:0_18:3) (a)  | -1.35 | (-2.23--0.46) | <b>2.93E-03</b> | <b>6.99E-03</b> |
| 391 | PE(16:0_18:3) (b)  | -0.24 | (-1.10- 0.63) | 5.84E-01        | 6.54E-01        |
| 392 | PE(17:0_18:2)      | -1.10 | (-1.76--0.43) | <b>1.28E-03</b> | <b>3.29E-03</b> |
| 393 | PE(18:0_18:1)      | 0.47  | (-0.14- 1.08) | 1.34E-01        | 1.86E-01        |
| 394 | PE(18:1_18:1)      | -0.30 | (-0.93- 0.33) | 3.50E-01        | 4.14E-01        |
| 395 | PE(18:0_18:2)      | 0.67  | (-0.01- 1.35) | 5.23E-02        | 8.65E-02        |
| 396 | PE(18:1_18:2)      | -0.61 | (-1.39- 0.17) | 1.27E-01        | 1.79E-01        |
| 397 | PE(16:0_20:3)      | -0.14 | (-0.95- 0.66) | 7.25E-01        | 7.82E-01        |
| 398 | PE(16:0_20:4)      | 0.82  | ( 0.11- 1.52) | <b>2.29E-02</b> | <b>4.20E-02</b> |
| 399 | PE(16:1_20:4)      | -0.02 | (-0.87- 0.83) | 9.56E-01        | 9.71E-01        |
| 400 | PE(16:0_20:5)      | -0.12 | (-1.12- 0.89) | 8.11E-01        | 8.54E-01        |
| 401 | PE(17:0_20:4)      | 0.00  | (-0.64- 0.63) | 9.92E-01        | 9.94E-01        |
| 402 | PE(18:0_20:3) (a)  | 1.82  | ( 1.06- 2.59) | <b>3.08E-06</b> | <b>1.59E-05</b> |
| 403 | PE(18:0_20:4)      | 1.97  | ( 1.39- 2.56) | <b>5.87E-11</b> | <b>9.72E-10</b> |
| 404 | PE(38:5) (a)       | 0.10  | (-0.60- 0.79) | 7.86E-01        | 8.33E-01        |
| 405 | PE(38:5) (b)       | -0.75 | (-1.56- 0.07) | 7.23E-02        | 1.12E-01        |
| 406 | PE(16:0_22:6)      | 0.07  | (-0.63- 0.77) | 8.52E-01        | 8.91E-01        |
| 407 | PE(17:0_22:6)      | -0.16 | (-0.86- 0.56) | 6.69E-01        | 7.28E-01        |
| 408 | PE(18:0_22:4)      | 0.64  | (-0.18- 1.47) | 1.26E-01        | 1.78E-01        |
| 409 | PE(18:0_22:5) (n3) | 0.66  | (-0.01- 1.33) | 5.49E-02        | 9.06E-02        |
| 410 | PE(18:0_22:5) (n6) | 0.40  | (-0.47- 1.29) | 3.67E-01        | 4.30E-01        |
| 411 | PE(18:0_22:6)      | 1.33  | ( 0.59- 2.08) | <b>4.39E-04</b> | <b>1.28E-03</b> |
| 412 | PE(40:7)           | -0.30 | (-1.10- 0.51) | 4.65E-01        | 5.29E-01        |
| 413 | PE(O-34:1)         | -1.21 | (-1.76--0.65) | <b>2.30E-05</b> | <b>9.04E-05</b> |
| 414 | PE(O-16:0/18:2)    | -2.30 | (-3.04--1.55) | <b>2.74E-09</b> | <b>2.44E-08</b> |
| 415 | PE(O-18:1/18:2)    | -1.33 | (-2.03--0.63) | <b>2.38E-04</b> | <b>7.36E-04</b> |
| 416 | PE(O-16:0/20:4)    | -1.07 | (-1.77--0.37) | <b>2.99E-03</b> | <b>7.11E-03</b> |
| 417 | PE(O-36:5)         | -1.89 | (-2.94--0.84) | <b>4.62E-04</b> | <b>1.33E-03</b> |
| 418 | PE(O-16:0/22:4)    | -0.54 | (-1.08- 0.02) | 5.74E-02        | 9.31E-02        |
| 419 | PE(O-18:0/20:4)    | -1.43 | (-2.21--0.64) | <b>4.06E-04</b> | <b>1.20E-03</b> |
| 420 | PE(O-38:5) (a)     | -1.14 | (-1.83--0.45) | <b>1.32E-03</b> | <b>3.38E-03</b> |
| 421 | PE(O-38:5) (b)     | -1.72 | (-2.35--1.08) | <b>1.73E-07</b> | <b>1.04E-06</b> |
| 422 | PE(O-16:0/22:6)    | -0.84 | (-1.44--0.23) | <b>7.04E-03</b> | <b>1.52E-02</b> |

|     |                      |       |               |                 |                 |
|-----|----------------------|-------|---------------|-----------------|-----------------|
| 423 | PE(O-18:0/22:6)      | -1.30 | (-1.88--0.72) | <b>1.52E-05</b> | <b>6.23E-05</b> |
| 424 | PE(O-18:1/22:6)      | -0.97 | (-1.54--0.39) | <b>9.92E-04</b> | <b>2.66E-03</b> |
| 425 | PE(P-16:0/18:1)      | -0.86 | (-1.36--0.36) | <b>7.40E-04</b> | <b>2.06E-03</b> |
| 426 | PE(P-16:0/18:2)      | -1.15 | (-1.80--0.50) | <b>5.72E-04</b> | <b>1.65E-03</b> |
| 427 | PE(P-16:0/20:3)      | 0.04  | (-0.65- 0.75) | 9.04E-01        | 9.29E-01        |
| 428 | PE(P-16:0/20:4)      | 0.40  | (-0.29- 1.10) | 2.58E-01        | 3.21E-01        |
| 429 | PE(P-16:0/20:5)      | -0.61 | (-1.87- 0.68) | 3.53E-01        | 4.14E-01        |
| 430 | PE(P-16:0/22:4)      | 0.33  | (-0.19- 0.86) | 2.16E-01        | 2.81E-01        |
| 431 | PE(P-16:0/22:5) (n3) | -0.43 | (-0.99- 0.14) | 1.38E-01        | 1.91E-01        |
| 432 | PE(P-16:0/22:5) (n6) | -0.67 | (-1.28--0.06) | <b>3.09E-02</b> | 5.48E-02        |
| 433 | PE(P-16:0/22:6)      | 0.18  | (-0.37- 0.73) | 5.27E-01        | 5.97E-01        |
| 434 | PE(P-17:0/20:4) (a)  | -0.07 | (-0.89- 0.76) | 8.69E-01        | 9.05E-01        |
| 435 | PE(P-17:0/20:4) (b)  | 0.12  | (-0.65- 0.90) | 7.61E-01        | 8.14E-01        |
| 436 | PE(P-17:0/22:6) (a)  | -1.02 | (-1.77--0.27) | <b>8.14E-03</b> | <b>1.70E-02</b> |
| 437 | PE(P-17:0/22:6) (b)  | -0.51 | (-1.20- 0.18) | 1.46E-01        | 1.99E-01        |
| 438 | PE(P-18:0/18:1)      | -0.97 | (-1.54--0.40) | <b>8.42E-04</b> | <b>2.30E-03</b> |
| 439 | PE(P-18:0/18:2)      | -1.48 | (-2.10--0.86) | <b>4.03E-06</b> | <b>1.95E-05</b> |
| 440 | PE(P-18:0/20:3)      | -0.53 | (-1.14- 0.09) | 9.38E-02        | 1.38E-01        |
| 441 | PE(P-18:0/20:4)      | 0.05  | (-0.67- 0.78) | 8.83E-01        | 9.15E-01        |
| 442 | PE(P-18:0/20:5)      | -1.20 | (-2.50- 0.12) | 7.52E-02        | 1.16E-01        |
| 443 | PE(P-18:0/22:4)      | -0.73 | (-1.29--0.18) | <b>1.01E-02</b> | <b>2.07E-02</b> |
| 444 | PE(P-18:0/22:5) (n3) | -0.63 | (-1.20--0.07) | <b>2.88E-02</b> | 5.13E-02        |
| 445 | PE(P-18:0/22:5) (n6) | -1.11 | (-1.66--0.56) | <b>9.76E-05</b> | <b>3.42E-04</b> |
| 446 | PE(P-18:0/22:6)      | -0.60 | (-1.22- 0.02) | 5.80E-02        | 9.34E-02        |
| 447 | PE(P-18:1/18:1)      | -0.84 | (-1.36--0.32) | <b>1.60E-03</b> | <b>4.03E-03</b> |
| 448 | PE(P-18:1/18:2)      | -1.57 | (-2.23--0.89) | <b>6.16E-06</b> | <b>2.84E-05</b> |
| 449 | PE(P-18:1/20:4)      | 0.10  | (-0.61- 0.82) | 7.85E-01        | 8.33E-01        |
| 450 | PE(P-18:1/20:5)      | -1.17 | (-2.42- 0.09) | 6.87E-02        | 1.08E-01        |
| 451 | PE(P-18:1/22:4)      | -0.18 | (-0.79- 0.43) | 5.58E-01        | 6.26E-01        |
| 452 | PE(P-18:1/22:5) (a)  | -0.62 | (-1.20--0.03) | <b>3.86E-02</b> | 6.71E-02        |
| 453 | PE(P-18:1/22:6) (a)  | -0.38 | (-1.00- 0.24) | 2.26E-01        | 2.87E-01        |
| 454 | PE(P-20:0/18:1)      | -1.16 | (-1.74--0.56) | <b>1.46E-04</b> | <b>4.89E-04</b> |
| 455 | PE(P-20:0/18:2)      | -1.56 | (-2.09--1.03) | <b>1.52E-08</b> | <b>1.10E-07</b> |

|     |                    |       |               |                 |                 |
|-----|--------------------|-------|---------------|-----------------|-----------------|
| 456 | PE(P-20:0/20:4)    | 0.01  | (-0.56- 0.58) | 9.71E-01        | 9.82E-01        |
| 457 | PE(P-20:0/22:6)    | -0.63 | (-1.12--0.13) | <b>1.35E-02</b> | <b>2.67E-02</b> |
| 458 | PE(P-20:1/20:4)    | -0.26 | (-1.08- 0.58) | 5.43E-01        | 6.11E-01        |
| 459 | PG(34:2)           | -0.90 | (-1.61--0.18) | <b>1.45E-02</b> | <b>2.82E-02</b> |
| 460 | PG(36:1)           | -0.29 | (-0.91- 0.33) | 3.53E-01        | 4.14E-01        |
| 461 | PI(16:0/16:0)      | -2.14 | (-3.02--1.24) | <b>3.56E-06</b> | <b>1.80E-05</b> |
| 462 | PI(16:0_16:1)      | -1.42 | (-2.44--0.40) | <b>6.52E-03</b> | <b>1.45E-02</b> |
| 463 | PI(34:0)           | -2.48 | (-3.36--1.60) | <b>6.20E-08</b> | <b>3.97E-07</b> |
| 464 | PI(34:1)           | -1.84 | (-2.48--1.20) | <b>2.61E-08</b> | <b>1.76E-07</b> |
| 465 | PI(17:0_18:1)      | -2.27 | (-2.82--1.72) | <b>3.26E-15</b> | <b>1.57E-13</b> |
| 466 | PI(17:0_18:2)      | -2.60 | (-3.19--2.00) | <b>1.23E-16</b> | <b>7.39E-15</b> |
| 467 | PI(18:0_18:1)      | -1.80 | (-2.47--1.13) | <b>1.90E-07</b> | <b>1.11E-06</b> |
| 468 | PI(36:2)           | -1.90 | (-2.45--1.35) | <b>3.65E-11</b> | <b>6.49E-10</b> |
| 469 | PI(18:1_18:2)      | -2.55 | (-3.14--1.95) | <b>3.92E-16</b> | <b>2.09E-14</b> |
| 470 | PI(16:0_20:3) (a)  | -1.92 | (-2.55--1.28) | <b>6.49E-09</b> | <b>5.19E-08</b> |
| 471 | PI(16:0_20:3) (b)  | -2.27 | (-2.99--1.55) | <b>1.20E-09</b> | <b>1.23E-08</b> |
| 472 | PI(16:0_20:4)      | -1.33 | (-1.88--0.77) | <b>4.23E-06</b> | <b>2.01E-05</b> |
| 473 | PI(18:0_20:2)      | -2.42 | (-3.08--1.75) | <b>5.08E-12</b> | <b>1.16E-10</b> |
| 474 | PI(18:0_20:3) (a)  | -0.92 | (-1.39--0.44) | <b>1.79E-04</b> | <b>5.82E-04</b> |
| 475 | PI(18:0_20:4)      | -0.83 | (-1.31--0.34) | <b>9.23E-04</b> | <b>2.50E-03</b> |
| 476 | PI(38:5) (a)       | -2.30 | (-2.82--1.78) | <b>5.13E-17</b> | <b>3.52E-15</b> |
| 477 | PI(38:6)           | -2.45 | (-3.06--1.83) | <b>3.89E-14</b> | <b>1.44E-12</b> |
| 478 | PI(18:0_22:4)      | -1.12 | (-1.73--0.50) | <b>4.46E-04</b> | <b>1.30E-03</b> |
| 479 | PI(18:0_22:5) (n3) | -1.50 | (-2.14--0.87) | <b>4.94E-06</b> | <b>2.30E-05</b> |
| 480 | PI(18:0_22:6)      | -1.86 | (-2.48--1.24) | <b>6.95E-09</b> | <b>5.47E-08</b> |

**Table S3A.** The overlapping lipid species between the ppBMI and postnatal BMI studies. Related to Figure 3.

| Lipid Species        | ppBMI (antenatal)                       |               |                 |                 | Adult BMI (postnatal)              |               |                 |                 | Trend    |
|----------------------|-----------------------------------------|---------------|-----------------|-----------------|------------------------------------|---------------|-----------------|-----------------|----------|
|                      | %change in lipid concentration per unit |               |                 |                 | %change in lipid concentration per |               |                 |                 |          |
|                      | BMI                                     | 95%CI         | p-value         | p-value(BH)     | unit BMI                           | 95%CI         | p-value         | p-value(BH)     |          |
| CE(16:1)             | -1.06                                   | (-1.82--0.29) | <b>7.23E-03</b> | <b>1.46E-02</b> | 2.17                               | (1.53-2.82)   | <b>6.89E-11</b> | <b>4.60E-10</b> | opposite |
| CE(18:3)             | -1.93                                   | (-2.54--1.32) | <b>1.28E-09</b> | <b>1.25E-08</b> | 0.72                               | (0.11-1.32)   | <b>2.04E-02</b> | <b>3.21E-02</b> | opposite |
| CE(20:1)             | -0.83                                   | (-1.29--0.37) | <b>4.07E-04</b> | <b>1.15E-03</b> | -0.70                              | (-1.17--0.22) | <b>4.06E-03</b> | <b>7.58E-03</b> | same     |
| CE(22:5) (n6)        | -1.88                                   | (-2.46--1.29) | <b>7.49E-10</b> | <b>7.92E-09</b> | -0.68                              | (-1.1--0.26)  | <b>1.77E-03</b> | <b>3.56E-03</b> | same     |
| DG(16:0_18:1)        | 1.33                                    | (0.59-2.07)   | <b>4.36E-04</b> | <b>1.22E-03</b> | 4.26                               | (3.33-5.21)   | <b>1.32E-18</b> | <b>4.86E-17</b> | same     |
| DG(16:0_18:2)        | 0.92                                    | (0.21-1.65)   | <b>1.15E-02</b> | <b>2.16E-02</b> | 3.62                               | (2.72-4.52)   | <b>5.53E-15</b> | <b>7.59E-14</b> | same     |
| DG(18:0_18:1)        | 1.36                                    | (0.69-2.04)   | <b>7.91E-05</b> | <b>2.60E-04</b> | 4.41                               | (3.51-5.31)   | <b>4.70E-21</b> | <b>4.51E-19</b> | same     |
| DG(18:1_18:1)        | 1.37                                    | (0.64-2.1)    | <b>2.23E-04</b> | <b>6.69E-04</b> | 2.93                               | (2.08-3.77)   | <b>1.44E-11</b> | <b>1.03E-10</b> | same     |
| DG(18:0_18:2)        | 0.99                                    | (0.23-1.76)   | <b>1.04E-02</b> | <b>1.97E-02</b> | 4.40                               | (3.41-5.39)   | <b>7.51E-18</b> | <b>2.57E-16</b> | same     |
| DG(18:1_18:2)        | 0.95                                    | (0.22-1.68)   | <b>1.02E-02</b> | <b>1.97E-02</b> | 2.26                               | (1.45-3.08)   | <b>5.91E-08</b> | <b>2.42E-07</b> | same     |
| DG(16:0_20:4)        | 1.19                                    | (0.26-2.12)   | <b>1.22E-02</b> | <b>2.27E-02</b> | 4.27                               | (3.25-5.3)    | <b>4.79E-16</b> | <b>9.59E-15</b> | same     |
| DG(18:1_20:4)        | 1.14                                    | (0.4-1.88)    | <b>2.42E-03</b> | <b>5.53E-03</b> | 2.47                               | (1.71-3.22)   | <b>1.81E-10</b> | <b>1.10E-09</b> | same     |
| DG(18:1_22:6)        | 1.53                                    | (0.47-2.61)   | <b>4.63E-03</b> | <b>9.97E-03</b> | 3.18                               | (2.04-4.34)   | <b>5.26E-08</b> | <b>2.22E-07</b> | same     |
| DG(18:2_22:6)        | 1.52                                    | (0.42-2.63)   | <b>6.55E-03</b> | <b>1.35E-02</b> | 3.05                               | (1.87-4.24)   | <b>3.60E-07</b> | <b>1.28E-06</b> | same     |
| TG(48:0) [NL-18:0]   | -1.56                                   | (-2.43--0.68) | <b>5.76E-04</b> | <b>1.53E-03</b> | 4.34                               | (2.99-5.71)   | <b>3.54E-10</b> | <b>2.07E-09</b> | opposite |
| TG(48:2) [NL-14:1]   | -1.20                                   | (-2.25--0.13) | <b>2.78E-02</b> | <b>4.70E-02</b> | 4.79                               | (3.42-6.18)   | <b>7.51E-12</b> | <b>5.72E-11</b> | opposite |
| TG(48:2) [NL-18:2]   | -1.16                                   | (-2.2--0.12)  | <b>2.91E-02</b> | <b>4.87E-02</b> | 5.21                               | (3.68-6.77)   | <b>2.87E-11</b> | <b>2.03E-10</b> | opposite |
| TG(48:3) [NL-14:0]   | -1.51                                   | (-2.64--0.37) | <b>9.55E-03</b> | <b>1.85E-02</b> | 4.32                               | (2.9-5.76)    | <b>2.31E-09</b> | <b>1.14E-08</b> | opposite |
| TG(48:3) [NL-18:3]   | -1.81                                   | (-3.07--0.53) | <b>5.76E-03</b> | <b>1.21E-02</b> | 4.99                               | (3.41-6.59)   | <b>5.23E-10</b> | <b>2.92E-09</b> | opposite |
| TG(50:1) [NL-16:0]   | 0.83                                    | (0.22-1.43)   | <b>7.27E-03</b> | <b>1.46E-02</b> | 4.34                               | (3.39-5.3)    | <b>1.03E-18</b> | <b>4.12E-17</b> | same     |
| TG(50:1) [NL-18:1]   | 0.76                                    | (0.18-1.34)   | <b>1.03E-02</b> | <b>1.97E-02</b> | 4.10                               | (3.16-5.05)   | <b>4.06E-17</b> | <b>1.08E-15</b> | same     |
| TG(50:2) [NL-14:0]   | -0.65                                   | (-1.21--0.07) | <b>2.69E-02</b> | <b>4.57E-02</b> | 2.80                               | (1.76-3.86)   | <b>1.50E-07</b> | <b>5.54E-07</b> | opposite |
| TG(50:2) [NL-18:2]   | 0.66                                    | (0.08-1.24)   | <b>2.58E-02</b> | <b>4.41E-02</b> | 3.72                               | (2.82-4.62)   | <b>8.45E-16</b> | <b>1.53E-14</b> | same     |
| TG(52:1) [NL-18:0]   | 1.38                                    | (0.59-2.18)   | <b>6.58E-04</b> | <b>1.73E-03</b> | 5.69                               | (4.53-6.86)   | <b>2.15E-21</b> | <b>2.58E-19</b> | same     |
| TG(52:1) [NL-18:1]   | 1.45                                    | (0.69-2.23)   | <b>2.04E-04</b> | <b>6.17E-04</b> | 5.86                               | (4.73-7)      | <b>1.79E-23</b> | <b>8.60E-21</b> | same     |
| TG(52:2) [NL-16:0]   | 0.80                                    | (0.4-1.21)    | <b>1.01E-04</b> | <b>3.29E-04</b> | 2.18                               | (1.57-2.79)   | <b>3.69E-12</b> | <b>3.11E-11</b> | same     |
| TG(52:3) [NL-18:2]   | 0.76                                    | (0.32-1.2)    | <b>8.08E-04</b> | <b>2.08E-03</b> | 1.84                               | (1.22-2.48)   | <b>1.11E-08</b> | <b>5.14E-08</b> | same     |
| TG(52:4) [NL-18:2]   | 1.20                                    | (0.44-1.96)   | <b>1.92E-03</b> | <b>4.52E-03</b> | 2.29                               | (1.29-3.3)    | <b>7.06E-06</b> | <b>2.12E-05</b> | same     |
| TG(53:2) [NL-18:1]   | 0.88                                    | (0.2-1.56)    | <b>1.08E-02</b> | <b>2.03E-02</b> | 2.66                               | (1.85-3.47)   | <b>1.63E-10</b> | <b>1.00E-09</b> | same     |
| TG(54:1) [NL-18:1]   | 0.99                                    | (0.32-1.66)   | <b>3.57E-03</b> | <b>8.00E-03</b> | 4.45                               | (3.57-5.34)   | <b>4.54E-22</b> | <b>7.26E-20</b> | same     |
| TG(54:2) [NL-18:0]   | 1.41                                    | (0.72-2.1)    | <b>6.55E-05</b> | <b>2.23E-04</b> | 4.24                               | (3.35-5.13)   | <b>2.72E-20</b> | <b>1.63E-18</b> | same     |
| TG(54:3) [NL-18:2]   | 0.72                                    | (0.14-1.3)    | <b>1.43E-02</b> | <b>2.59E-02</b> | 2.23                               | (1.57-2.89)   | <b>5.13E-11</b> | <b>3.51E-10</b> | same     |
| TG(54:5) [NL-20:4]   | 1.04                                    | (0.38-1.71)   | <b>1.91E-03</b> | <b>4.51E-03</b> | 3.37                               | (2.55-4.2)    | <b>2.12E-15</b> | <b>3.39E-14</b> | same     |
| TG(54:6) [NL-20:4]   | 1.16                                    | (0.33-2)      | <b>6.24E-03</b> | <b>1.29E-02</b> | 3.69                               | (2.71-4.68)   | <b>2.17E-13</b> | <b>2.27E-12</b> | same     |
| TG(54:6) [NL-22:6]   | 1.79                                    | (0.57-3.02)   | <b>4.10E-03</b> | <b>9.06E-03</b> | 5.76                               | (4.33-7.22)   | <b>4.96E-15</b> | <b>7.00E-14</b> | same     |
| TG(56:6) [NL-20:4]   | 1.34                                    | (0.81-1.87)   | <b>7.12E-07</b> | <b>3.60E-06</b> | 1.36                               | (0.85-1.88)   | <b>2.38E-07</b> | <b>8.65E-07</b> | same     |
| TG(56:7) [NL-20:4]   | 1.02                                    | (0.35-1.7)    | <b>2.84E-03</b> | <b>6.40E-03</b> | 1.88                               | (1.14-2.62)   | <b>6.63E-07</b> | <b>2.29E-06</b> | same     |
| TG(56:7) [NL-22:6]   | 1.93                                    | (0.84-3.04)   | <b>4.97E-04</b> | <b>1.35E-03</b> | 3.96                               | (2.65-5.28)   | <b>3.33E-09</b> | <b>1.61E-08</b> | same     |
| TG(56:8) [NL-22:6]   | 1.76                                    | (0.54-2.99)   | <b>4.49E-03</b> | <b>9.76E-03</b> | 3.97                               | (2.64-5.31)   | <b>4.96E-09</b> | <b>2.38E-08</b> | same     |
| TG(58:8) [NL-22:6]   | 1.46                                    | (0.38-2.56)   | <b>7.98E-03</b> | <b>1.58E-02</b> | 2.80                               | (1.58-4.04)   | <b>7.21E-06</b> | <b>2.15E-05</b> | same     |
| TG(O-54:2) [NL-18:1] | 0.85                                    | (0.18-1.53)   | <b>1.33E-02</b> | <b>2.43E-02</b> | 2.63                               | (1.82-3.44)   | <b>2.48E-10</b> | <b>1.47E-09</b> | same     |
| dhCer(d18:0/22:0)    | 1.14                                    | (0.5-1.79)    | <b>4.77E-04</b> | <b>1.32E-03</b> | 1.96                               | (1.35-2.58)   | <b>4.98E-10</b> | <b>2.81E-09</b> | same     |
| dhCer(d18:0/24:1)    | 1.70                                    | (0.99-2.41)   | <b>3.01E-06</b> | <b>1.36E-05</b> | 1.49                               | (0.78-2.2)    | <b>4.22E-05</b> | <b>1.11E-04</b> | same     |
| Cer(d16:1/22:0)      | -0.73                                   | (-1.33--0.13) | <b>1.79E-02</b> | <b>3.18E-02</b> | 1.20                               | (0.56-1.84)   | <b>2.31E-04</b> | <b>5.51E-04</b> | opposite |
| Cer(d16:1/23:0)      | -0.99                                   | (-1.66--0.32) | <b>3.93E-03</b> | <b>8.74E-03</b> | 0.76                               | (0.1-1.42)    | <b>2.38E-02</b> | <b>3.69E-02</b> | opposite |
| Cer(d18:1/18:0)      | 1.97                                    | (1.31-2.64)   | <b>7.34E-09</b> | <b>5.29E-08</b> | 2.07                               | (1.45-2.7)    | <b>1.07E-10</b> | <b>6.87E-10</b> | same     |
| Cer(d18:2/24:0)      | -1.25                                   | (-1.79--0.69) | <b>1.15E-05</b> | <b>4.61E-05</b> | -0.68                              | (-1.22--0.14) | <b>1.42E-02</b> | <b>2.32E-02</b> | same     |
| Cer(d19:1/24:0)      | -1.22                                   | (-2.12--0.32) | <b>8.01E-03</b> | <b>1.58E-02</b> | 1.08                               | (0.23-1.93)   | <b>1.29E-02</b> | <b>2.13E-02</b> | opposite |
| Cer(m18:0/24:1)      | 1.15                                    | (0.26-2.04)   | <b>1.11E-02</b> | <b>2.08E-02</b> | 2.84                               | (2-3.68)      | <b>3.94E-11</b> | <b>2.74E-10</b> | same     |
| Cer(m18:1/24:1)      | 1.37                                    | (0.47-2.27)   | <b>2.70E-03</b> | <b>6.11E-03</b> | 2.73                               | (1.88-3.59)   | <b>4.23E-10</b> | <b>2.42E-09</b> | same     |
| GM3(d18:1/18:0)      | -1.16                                   | (-1.7--0.62)  | <b>2.65E-05</b> | <b>9.76E-05</b> | -0.70                              | (-1.2--0.2)   | <b>5.94E-03</b> | <b>1.06E-02</b> | same     |
| GM3(d18:1/24:0)      | -3.17                                   | (-3.78--2.56) | <b>5.91E-22</b> | <b>9.47E-20</b> | -1.92                              | (-2.46--1.39) | <b>6.41E-12</b> | <b>5.13E-11</b> | same     |
| GM3(d18:1/24:1)      | -1.77                                   | (-2.36--1.17) | <b>1.05E-08</b> | <b>7.23E-08</b> | -1.28                              | (-1.87--0.68) | <b>2.89E-05</b> | <b>7.79E-05</b> | same     |
| HexCer(d18:1/18:0)   | -1.56                                   | (-2.15--0.97) | <b>3.24E-07</b> | <b>1.80E-06</b> | -1.40                              | (-2.04--0.75) | <b>2.70E-05</b> | <b>7.38E-05</b> | same     |
| HexCer(d18:1/20:0)   | -1.84                                   | (-2.41--1.27) | <b>4.40E-10</b> | <b>5.02E-09</b> | -1.29                              | (-1.81--0.76) | <b>2.18E-06</b> | <b>6.88E-06</b> | same     |
| HexCer(d18:1/22:0)   | -1.93                                   | (-2.43--1.44) | <b>1.05E-13</b> | <b>3.87E-12</b> | -0.92                              | (-1.41--0.43) | <b>2.61E-04</b> | <b>6.17E-04</b> | same     |
| HexCer(d18:1/24:0)   | -2.60                                   | (-3.1--2.09)  | <b>5.92E-22</b> | <b>9.47E-20</b> | -1.34                              | (-1.83--0.85) | <b>1.19E-07</b> | <b>4.57E-07</b> | same     |
| HexCer(d18:1/24:1)   | -1.68                                   | (-2.24--1.13) | <b>5.30E-09</b> | <b>4.04E-08</b> | -1.23                              | (-1.76--0.69) | <b>8.47E-06</b> | <b>2.48E-05</b> | same     |
| Hex2Cer(d18:1/16:0)  | -1.58                                   | (-2.1--1.05)  | <b>6.78E-09</b> | <b>5.09E-08</b> | -1.17                              | (-1.7--0.63)  | <b>2.30E-05</b> | <b>6.34E-05</b> | same     |
| Hex2Cer(d18:1/22:0)  | -1.73                                   | (-2.29--1.17) | <b>2.30E-09</b> | <b>2.05E-08</b> | -1.43                              | (-2--0.87)    | <b>8.84E-07</b> | <b>2.91E-06</b> | same     |
| Hex2Cer(d18:1/24:1)  | -1.66                                   | (-2.25--1.07) | <b>4.96E-08</b> | <b>3.13E-07</b> | -1.91                              | (-2.5--1.32)  | <b>5.82E-10</b> | <b>3.21E-09</b> | same     |
| Hex3Cer(d18:1/16:0)  | -1.04                                   | (-1.45--0.62) | <b>1.58E-06</b> | <b>7.44E-06</b> | -1.03                              | (-1.43--0.63) | <b>6.36E-07</b> | <b>2.21E-06</b> | same     |
| Hex3Cer(d18:1/22:0)  | -1.54                                   | (-2.14--0.93) | <b>9.28E-07</b> | <b>4.59E-06</b> | -2.07                              | (-2.63--1.51) | <b>2.59E-12</b> | <b>2.22E-11</b> | same     |
| Hex3Cer(d18:1/24:0)  | -1.57                                   | (-2.15--0.99) | <b>1.64E-07</b> | <b>9.85E-07</b> | -1.90                              | (-2.42--1.37) | <b>6.58E-12</b> | <b>5.18E-11</b> | same     |

|                                           |       |               |                 |                 |       |               |                 |                 |          |
|-------------------------------------------|-------|---------------|-----------------|-----------------|-------|---------------|-----------------|-----------------|----------|
| Hex3Cer(d18:1/24:1)                       | -1.14 | (-1.69--0.58) | <b>6.61E-05</b> | <b>2.23E-04</b> | -1.42 | (-1.92--0.93) | <b>3.28E-08</b> | <b>1.42E-07</b> | same     |
| SM(d18:0/14:0)                            | -0.89 | (-1.42--0.36) | <b>1.08E-03</b> | <b>2.70E-03</b> | 0.73  | (0.18-1.28)   | <b>9.62E-03</b> | <b>1.64E-02</b> | opposite |
| SM(d18:1/14:0)/SM(d16:1/16:0)             | -1.03 | (-1.5--0.55)  | <b>2.66E-05</b> | <b>9.76E-05</b> | 0.72  | (0.27-1.18)   | <b>1.93E-03</b> | <b>3.86E-03</b> | opposite |
| SM(d18:1/16:0)                            | -1.46 | (-1.99--0.92) | <b>1.89E-07</b> | <b>1.08E-06</b> | -0.89 | (-1.41--0.37) | <b>9.07E-04</b> | <b>1.95E-03</b> | same     |
| SM(35:2) (b)                              | -1.53 | (-2.12--0.94) | <b>4.86E-07</b> | <b>2.56E-06</b> | -0.79 | (-1.37--0.2)  | <b>8.48E-03</b> | <b>1.46E-02</b> | same     |
| SM(37:2)                                  | -1.21 | (-1.81--0.6)  | <b>1.07E-04</b> | <b>3.46E-04</b> | -1.13 | (-1.68--0.57) | <b>7.90E-05</b> | <b>2.02E-04</b> | same     |
| SM(d18:1/20:0)/SM(d16:1/22:0)             | -0.75 | (-1.17--0.33) | <b>4.82E-04</b> | <b>1.32E-03</b> | 0.43  | (0.04-0.83)   | <b>2.93E-02</b> | <b>4.47E-02</b> | opposite |
| SM(38:3) (b)                              | -0.77 | (-1.33--0.22) | <b>6.71E-03</b> | <b>1.37E-02</b> | -0.67 | (-1.28--0.07) | <b>3.00E-02</b> | <b>4.55E-02</b> | same     |
| SM(d18:1/22:0)/SM(d16:1/24:0)             | -0.59 | (-1.06--0.13) | <b>1.28E-02</b> | <b>2.38E-02</b> | 0.71  | (0.26-1.16)   | <b>2.08E-03</b> | <b>4.13E-03</b> | opposite |
| SM(d16:1/24:1)                            | -0.70 | (-1.21--0.19) | <b>7.53E-03</b> | <b>1.51E-02</b> | 0.55  | (0.05-1.05)   | <b>3.15E-02</b> | <b>4.75E-02</b> | opposite |
| SM(d18:2/23:0)                            | -0.93 | (-1.36--0.5)  | <b>2.33E-05</b> | <b>8.74E-05</b> | -0.51 | (-0.9--0.11)  | <b>1.15E-02</b> | <b>1.91E-02</b> | same     |
| SM(d18:2/24:0)                            | -1.48 | (-1.89--1.07) | <b>6.63E-12</b> | <b>1.45E-10</b> | -0.85 | (-1.23--0.46) | <b>1.89E-05</b> | <b>5.27E-05</b> | same     |
| SM(44:3) (a)                              | -1.42 | (-1.88--0.95) | <b>4.02E-09</b> | <b>3.21E-08</b> | -1.26 | (-1.69--0.84) | <b>1.15E-08</b> | <b>5.25E-08</b> | same     |
| LPC(15-MHDA) [sn2]                        | -1.34 | (-2.09--0.59) | <b>5.17E-04</b> | <b>1.39E-03</b> | -1.80 | (-2.53--1.05) | <b>2.97E-06</b> | <b>9.21E-06</b> | same     |
| LPC(15-MHDA) [sn1] / LPC(17:0) [sn2]      | -1.22 | (-1.86--0.59) | <b>1.83E-04</b> | <b>5.61E-04</b> | -1.69 | (-2.31--1.07) | <b>1.33E-07</b> | <b>5.00E-07</b> | same     |
| LPC(17:0) [sn1]                           | -0.89 | (-1.39--0.39) | <b>5.04E-04</b> | <b>1.36E-03</b> | -1.40 | (-1.9--0.89)  | <b>8.98E-08</b> | <b>3.53E-07</b> | same     |
| LPC(17:1) [sn1] (a) / LPC(17:1) [sn2] (b) | -0.95 | (-1.52--0.37) | <b>1.28E-03</b> | <b>3.14E-03</b> | -0.68 | (-1.27--0.08) | <b>2.64E-02</b> | <b>4.06E-02</b> | same     |
| LPC(18:1) [sn2]                           | -0.59 | (-1.11--0.07) | <b>2.69E-02</b> | <b>4.57E-02</b> | -1.43 | (-2--0.86)    | <b>1.28E-06</b> | <b>4.15E-06</b> | same     |
| LPC(18:2) [sn2]                           | -0.64 | (-1.13--0.15) | <b>1.04E-02</b> | <b>1.97E-02</b> | -2.17 | (-2.7--1.63)  | <b>2.57E-14</b> | <b>3.16E-13</b> | same     |
| LPC(18:3) [sn2] (a)                       | -1.54 | (-2.23--0.85) | <b>1.68E-05</b> | <b>6.51E-05</b> | -0.86 | (-1.59--0.12) | <b>2.29E-02</b> | <b>3.56E-02</b> | same     |
| LPC(19:0) [sn1] (a) / LPC(19:0) [sn2] (b) | -1.56 | (-2.02--1.09) | <b>1.61E-10</b> | <b>2.49E-09</b> | -2.28 | (-2.79--1.76) | <b>6.69E-17</b> | <b>1.61E-15</b> | same     |
| LPC(20:0) [sn1]                           | -1.59 | (-2.03--1.14) | <b>1.26E-11</b> | <b>2.64E-10</b> | -2.10 | (-2.58--1.62) | <b>1.05E-16</b> | <b>2.41E-15</b> | same     |
| LPC(20:1) [sn2]                           | -0.60 | (-1.07--0.14) | <b>1.07E-02</b> | <b>2.02E-02</b> | -1.58 | (-2.1--1.06)  | <b>5.88E-09</b> | <b>2.79E-08</b> | same     |
| LPC(20:1) [sn1]                           | -0.62 | (-1.08--0.15) | <b>9.49E-03</b> | <b>1.84E-02</b> | -1.86 | (-2.38--1.33) | <b>1.33E-11</b> | <b>9.82E-11</b> | same     |
| LPC(20:2) [sn2]                           | -0.91 | (-1.41--0.4)  | <b>4.81E-04</b> | <b>1.32E-03</b> | -0.80 | (-1.3--0.31)  | <b>1.50E-03</b> | <b>3.03E-03</b> | same     |
| LPC(20:2) [sn1]                           | -0.63 | (-1.11--0.16) | <b>9.14E-03</b> | <b>1.78E-02</b> | -0.94 | (-1.4--0.46)  | <b>1.11E-04</b> | <b>2.77E-04</b> | same     |
| LPC(20:3) [sn2]                           | 1.05  | (0.4-1.7)     | <b>1.48E-03</b> | <b>3.59E-03</b> | 1.19  | (0.56-1.83)   | <b>2.39E-04</b> | <b>5.67E-04</b> | same     |
| LPC(20:3) [sn1]                           | 1.28  | (0.59-1.97)   | <b>2.78E-04</b> | <b>8.08E-04</b> | 0.91  | (0.26-1.56)   | <b>5.99E-03</b> | <b>1.06E-02</b> | same     |
| LPC(20:3) [104_sn1]                       | 1.42  | (0.72-2.12)   | <b>7.46E-05</b> | <b>2.47E-04</b> | 0.93  | (0.28-1.58)   | <b>4.92E-03</b> | <b>8.95E-03</b> | same     |
| LPC(20:4) [sn2]                           | 0.85  | (0.33-1.37)   | <b>1.45E-03</b> | <b>3.53E-03</b> | -0.79 | (-1.3--0.28)  | <b>2.64E-03</b> | <b>5.13E-03</b> | opposite |
| LPC(20:4) [sn1]                           | 1.36  | (0.79-1.93)   | <b>3.16E-06</b> | <b>1.42E-05</b> | -1.16 | (-1.71--0.61) | <b>4.15E-05</b> | <b>1.10E-04</b> | opposite |
| LPC(22:5) [sn2] (n3)                      | -0.98 | (-1.6--0.35)  | <b>2.21E-03</b> | <b>5.12E-03</b> | -0.74 | (-1.34--0.14) | <b>1.67E-02</b> | <b>2.68E-02</b> | same     |
| LPC(22:5) [sn1] (n3)/LPC(22:5) [sn2] (n6) | -0.84 | (-1.42--0.26) | <b>4.63E-03</b> | <b>9.97E-03</b> | -0.82 | (-1.43--0.21) | <b>8.19E-03</b> | <b>1.42E-02</b> | same     |
| LPC(O-18:0)                               | -1.05 | (-1.59--0.5)  | <b>1.83E-04</b> | <b>5.61E-04</b> | -1.53 | (-2.07--0.99) | <b>5.02E-08</b> | <b>2.13E-07</b> | same     |
| LPC(O-18:1)                               | 0.52  | (0.07-0.97)   | <b>2.38E-02</b> | <b>4.13E-02</b> | -0.80 | (-1.25--0.35) | <b>5.53E-04</b> | <b>1.23E-03</b> | opposite |
| LPC(O-20:0)                               | -1.70 | (-2.21--1.19) | <b>1.86E-10</b> | <b>2.70E-09</b> | -2.23 | (-2.77--1.69) | <b>4.19E-15</b> | <b>6.29E-14</b> | same     |
| LPC(O-22:0)                               | -2.40 | (-2.88--1.91) | <b>1.69E-20</b> | <b>2.02E-18</b> | -1.43 | (-1.85--1)    | <b>1.03E-10</b> | <b>6.79E-10</b> | same     |
| LPC(O-22:1)                               | -1.62 | (-2.15--1.1)  | <b>2.73E-09</b> | <b>2.33E-08</b> | -2.10 | (-2.63--1.56) | <b>9.90E-14</b> | <b>1.16E-12</b> | same     |
| LPC(O-24:0)                               | -3.04 | (-3.62--2.45) | <b>1.56E-22</b> | <b>7.48E-20</b> | -1.17 | (-1.62--0.71) | <b>7.24E-07</b> | <b>2.45E-06</b> | same     |
| LPC(O-24:1)                               | -2.43 | (-2.98--1.87) | <b>1.19E-16</b> | <b>8.16E-15</b> | -1.37 | (-1.84--0.9)  | <b>1.75E-08</b> | <b>7.86E-08</b> | same     |
| LPC(O-24:2)                               | -1.94 | (-2.53--1.34) | <b>3.86E-10</b> | <b>4.64E-09</b> | -2.07 | (-2.6--1.53)  | <b>1.68E-13</b> | <b>1.79E-12</b> | same     |
| LPC(P-18:1)                               | 0.95  | (0.36-1.54)   | <b>1.57E-03</b> | <b>3.78E-03</b> | -0.88 | (-1.4--0.35)  | <b>1.14E-03</b> | <b>2.40E-03</b> | opposite |
| LPC(P-20:0)                               | -0.73 | (-1.3--0.15)  | <b>1.34E-02</b> | <b>2.43E-02</b> | -1.56 | (-2.13--0.99) | <b>1.23E-07</b> | <b>4.68E-07</b> | same     |
| LPE(16:0) [sn2]                           | -0.58 | (-1.09--0.08) | <b>2.45E-02</b> | <b>4.23E-02</b> | -1.40 | (-1.94--0.85) | <b>8.49E-07</b> | <b>2.81E-06</b> | same     |
| PC(31:1)                                  | -2.56 | (-3.45--1.67) | <b>3.05E-08</b> | <b>2.06E-07</b> | 1.45  | (0.56-2.34)   | <b>1.35E-03</b> | <b>2.79E-03</b> | opposite |
| PC(33:2)                                  | -2.27 | (-2.89--1.64) | <b>6.00E-12</b> | <b>1.37E-10</b> | -0.81 | (-1.42--0.19) | <b>1.07E-02</b> | <b>1.78E-02</b> | same     |
| PC(16:0_18:2)                             | -0.34 | (-0.64--0.04) | <b>2.86E-02</b> | <b>4.82E-02</b> | -0.56 | (-0.98--0.15) | <b>7.64E-03</b> | <b>1.33E-02</b> | same     |
| PC(15-MHDA_18:2)                          | -1.86 | (-2.67--1.05) | <b>9.80E-06</b> | <b>4.05E-05</b> | -1.20 | (-1.96--0.42) | <b>2.53E-03</b> | <b>4.94E-03</b> | same     |
| PC(17:0_18:2)                             | -1.54 | (-2.08--1)    | <b>3.86E-08</b> | <b>2.57E-07</b> | -1.17 | (-1.68--0.65) | <b>1.30E-05</b> | <b>3.74E-05</b> | same     |
| PC(36:0)                                  | 0.97  | (0.36-1.59)   | <b>2.00E-03</b> | <b>4.66E-03</b> | 3.16  | (2.47-3.84)   | <b>7.15E-19</b> | <b>3.43E-17</b> | same     |
| PC(18:0_18:1)                             | -1.34 | (-1.89--0.78) | <b>3.35E-06</b> | <b>1.49E-05</b> | 0.98  | (0.36-1.59)   | <b>1.86E-03</b> | <b>3.74E-03</b> | opposite |
| PC(16:0_20:3) (a)                         | -1.23 | (-1.82--0.64) | <b>5.06E-05</b> | <b>1.75E-04</b> | -1.61 | (-2.18--1.04) | <b>5.63E-08</b> | <b>2.33E-07</b> | same     |
| PC(18:2_18:2)                             | -2.57 | (-3.28--1.87) | <b>3.69E-12</b> | <b>9.32E-11</b> | -2.49 | (-3.22--1.75) | <b>1.24E-10</b> | <b>7.80E-10</b> | same     |
| PC(15:0_22:6)                             | -2.68 | (-3.42--1.94) | <b>3.93E-12</b> | <b>9.43E-11</b> | -0.93 | (-1.62--0.24) | <b>8.87E-03</b> | <b>1.52E-02</b> | same     |
| PC(38:2)                                  | -1.13 | (-1.58--0.67) | <b>1.45E-06</b> | <b>6.94E-06</b> | 0.67  | (0.19-1.14)   | <b>5.76E-03</b> | <b>1.03E-02</b> | opposite |
| PC(18:0_20:3)                             | 1.23  | (0.54-1.93)   | <b>5.29E-04</b> | <b>1.41E-03</b> | 3.69  | (2.93-4.46)   | <b>1.54E-20</b> | <b>1.06E-18</b> | same     |
| PC(38:4) (b)                              | -0.97 | (-1.66--0.28) | <b>5.93E-03</b> | <b>1.24E-02</b> | 1.29  | (0.57-2.02)   | <b>4.90E-04</b> | <b>1.11E-03</b> | opposite |
| PC(38:6) (a)                              | -1.01 | (-1.61--0.42) | <b>9.39E-04</b> | <b>2.36E-03</b> | -1.09 | (-1.67--0.5)  | <b>2.90E-04</b> | <b>6.81E-04</b> | same     |
| PC(38:7)(c)                               | -1.58 | (-2.17--0.99) | <b>2.34E-07</b> | <b>1.32E-06</b> | -0.64 | (-1.21--0.06) | <b>2.93E-02</b> | <b>4.47E-02</b> | same     |
| PC(39:5)(a)                               | -2.53 | (-3.35--1.7)  | <b>4.56E-09</b> | <b>3.53E-08</b> | -1.82 | (-2.59--1.05) | <b>4.96E-06</b> | <b>1.51E-05</b> | same     |
| PC(39:5)(b)                               | -2.31 | (-3.04--1.58) | <b>1.68E-09</b> | <b>1.56E-08</b> | -0.86 | (-1.58--0.13) | <b>2.03E-02</b> | <b>3.21E-02</b> | same     |
| PC(15-MHDA_22:6)                          | -2.51 | (-3.31--1.7)  | <b>2.77E-09</b> | <b>2.33E-08</b> | -1.62 | (-2.33--0.91) | <b>1.10E-05</b> | <b>3.17E-05</b> | same     |
| PC(17:0_22:6)                             | -2.00 | (-2.74--1.26) | <b>1.87E-07</b> | <b>1.08E-06</b> | -1.05 | (-1.79--0.31) | <b>5.44E-03</b> | <b>9.82E-03</b> | same     |
| PC(18:0_22:5) (n6)                        | -1.32 | (-2.07--0.57) | <b>6.32E-04</b> | <b>1.67E-03</b> | 1.17  | (0.37-1.97)   | <b>3.94E-03</b> | <b>7.42E-03</b> | opposite |
| PC(18:1_22:6) (a)                         | -1.70 | (-2.24--1.16) | <b>1.69E-09</b> | <b>1.56E-08</b> | -0.86 | (-1.44--0.27) | <b>4.10E-03</b> | <b>7.62E-03</b> | same     |
| PC(40:8)                                  | -1.77 | (-2.3--1.24)  | <b>1.86E-10</b> | <b>2.70E-09</b> | -1.88 | (-2.39--1.37) | <b>2.15E-12</b> | <b>1.91E-11</b> | same     |
| PC(44:12)                                 | -2.40 | (-3.44--1.34) | <b>1.14E-05</b> | <b>4.60E-05</b> | -2.61 | (-3.74--1.46) | <b>1.06E-05</b> | <b>3.09E-05</b> | same     |
| PC(O-16:0/16:0)                           | -0.78 | (-1.21--0.35) | <b>3.82E-04</b> | <b>1.09E-03</b> | -0.75 | (-1.18--0.33) | <b>5.02E-04</b> | <b>1.13E-03</b> | same     |
| PC(O-34:1)                                | -0.84 | (-1.27--0.41) | <b>1.54E-04</b> | <b>4.84E-04</b> | -1.21 | (-1.62--0.79) | <b>2.44E-08</b> | <b>1.08E-07</b> | same     |

|                      |       |               |                 |                 |       |               |                 |                 |          |
|----------------------|-------|---------------|-----------------|-----------------|-------|---------------|-----------------|-----------------|----------|
| PC(O-34:2)           | -2.02 | (-2.62--1.41) | <b>2.10E-10</b> | <b>2.80E-09</b> | -1.75 | (-2.35--1.15) | <b>2.36E-08</b> | <b>1.05E-07</b> | same     |
| PC(O-36:0)           | -1.30 | (-1.8--0.81)  | <b>3.88E-07</b> | <b>2.12E-06</b> | -0.84 | (-1.33--0.35) | <b>9.07E-04</b> | <b>1.95E-03</b> | same     |
| PC(O-18:0/18:1)      | -1.51 | (-1.98--1.03) | <b>1.00E-09</b> | <b>1.02E-08</b> | -1.48 | (-1.92--1.04) | <b>1.07E-10</b> | <b>6.87E-10</b> | same     |
| PC(O-18:1/18:1)      | -1.20 | (-1.66--0.74) | <b>4.16E-07</b> | <b>2.24E-06</b> | -1.71 | (-2.13--1.29) | <b>1.10E-14</b> | <b>1.42E-13</b> | same     |
| PC(O-18:0/18:2)      | -2.36 | (-2.92--1.79) | <b>3.60E-15</b> | <b>1.73E-13</b> | -1.89 | (-2.38--1.39) | <b>4.43E-13</b> | <b>4.43E-12</b> | same     |
| PC(O-18:1/18:2)      | -1.41 | (-1.96--0.86) | <b>7.43E-07</b> | <b>3.71E-06</b> | -1.34 | (-1.85--0.82) | <b>6.84E-07</b> | <b>2.35E-06</b> | same     |
| PC(O-40:5)           | -0.80 | (-1.3--0.3)   | <b>1.67E-03</b> | <b>3.98E-03</b> | -0.88 | (-1.34--0.42) | <b>1.90E-04</b> | <b>4.60E-04</b> | same     |
| PC(O-18:0/22:6)      | -0.69 | (-1.25--0.12) | <b>1.77E-02</b> | <b>3.15E-02</b> | -1.09 | (-1.63--0.55) | <b>9.15E-05</b> | <b>2.31E-04</b> | same     |
| PC(P-16:0/14:0)      | -1.27 | (-1.86--0.68) | <b>2.71E-05</b> | <b>9.86E-05</b> | -1.18 | (-1.79--0.56) | <b>1.98E-04</b> | <b>4.77E-04</b> | same     |
| PC(P-16:0/16:0)      | -0.71 | (-1.21--0.2)  | <b>6.69E-03</b> | <b>1.37E-02</b> | -1.03 | (-1.54--0.53) | <b>6.60E-05</b> | <b>1.72E-04</b> | same     |
| PC(P-16:0/16:1)      | -0.71 | (-1.31--0.11) | <b>2.01E-02</b> | <b>3.52E-02</b> | -0.83 | (-1.39--0.26) | <b>4.66E-03</b> | <b>8.63E-03</b> | same     |
| PC(P-16:0/18:0)      | -1.20 | (-1.59--0.81) | <b>3.58E-09</b> | <b>2.91E-08</b> | -1.47 | (-1.84--1.09) | <b>1.05E-13</b> | <b>1.20E-12</b> | same     |
| PC(P-16:0/18:1)      | -1.21 | (-1.75--0.67) | <b>1.36E-05</b> | <b>5.30E-05</b> | -2.19 | (-2.7--1.69)  | <b>2.94E-16</b> | <b>6.14E-15</b> | same     |
| PC(P-16:0/18:2)      | -1.10 | (-1.68--0.5)  | <b>3.02E-04</b> | <b>8.73E-04</b> | -2.03 | (-2.57--1.48) | <b>1.39E-12</b> | <b>1.28E-11</b> | same     |
| PC(P-16:0/18:3)      | -1.64 | (-2.27--1.01) | <b>5.09E-07</b> | <b>2.66E-06</b> | -1.42 | (-1.99--0.84) | <b>2.28E-06</b> | <b>7.17E-06</b> | same     |
| PC(P-35:2) (a)       | -2.26 | (-3.13--1.39) | <b>5.70E-07</b> | <b>2.91E-06</b> | -1.87 | (-2.71--1.02) | <b>1.87E-05</b> | <b>5.25E-05</b> | same     |
| PC(P-35:2) (b)       | -1.83 | (-2.55--1.1)  | <b>1.07E-06</b> | <b>5.20E-06</b> | -2.14 | (-2.83--1.45) | <b>2.27E-09</b> | <b>1.13E-08</b> | same     |
| PC(P-18:1/18:1)      | -1.20 | (-1.72--0.68) | <b>7.54E-06</b> | <b>3.17E-05</b> | -1.58 | (-2.08--1.09) | <b>7.85E-10</b> | <b>4.18E-09</b> | same     |
| PC(P-18:0/18:2)      | -1.93 | (-2.51--1.36) | <b>1.35E-10</b> | <b>2.16E-09</b> | -2.58 | (-3.1--2.06)  | <b>1.54E-20</b> | <b>1.06E-18</b> | same     |
| PC(P-38:5) (b)       | -0.85 | (-1.43--0.27) | <b>4.44E-03</b> | <b>9.70E-03</b> | -1.10 | (-1.67--0.53) | <b>1.76E-04</b> | <b>4.33E-04</b> | same     |
| PC(P-40:5) (b)       | -0.80 | (-1.37--0.24) | <b>5.56E-03</b> | <b>1.18E-02</b> | -1.41 | (-1.93--0.9)  | <b>1.16E-07</b> | <b>4.47E-07</b> | same     |
| PE(18:0_20:3) (a)    | 1.68  | (0.87-2.5)    | <b>4.94E-05</b> | <b>1.72E-04</b> | 2.90  | (1.96-3.84)   | <b>1.44E-09</b> | <b>7.41E-09</b> | same     |
| PE(18:0_22:6)        | 1.34  | (0.55-2.14)   | <b>8.34E-04</b> | <b>2.13E-03</b> | 1.67  | (0.73-2.63)   | <b>5.37E-04</b> | <b>1.20E-03</b> | same     |
| PE(O-34:1)           | -1.42 | (-2--0.83)    | <b>2.58E-06</b> | <b>1.19E-05</b> | -1.43 | (-2.04--0.82) | <b>6.33E-06</b> | <b>1.91E-05</b> | same     |
| PE(O-16:0/18:2)      | -2.74 | (-3.5--1.96)  | <b>1.39E-11</b> | <b>2.79E-10</b> | -2.48 | (-3.27--1.68) | <b>2.70E-09</b> | <b>1.32E-08</b> | same     |
| PE(O-18:1/18:2)      | -1.56 | (-2.3--0.82)  | <b>4.20E-05</b> | <b>1.47E-04</b> | -1.10 | (-1.81--0.38) | <b>2.71E-03</b> | <b>5.25E-03</b> | same     |
| PE(O-16:0/20:4)      | -1.39 | (-2.12--0.65) | <b>2.38E-04</b> | <b>7.02E-04</b> | -1.38 | (-2.13--0.61) | <b>4.51E-04</b> | <b>1.03E-03</b> | same     |
| PE(O-18:0/20:4)      | -1.81 | (-2.63--0.99) | <b>2.02E-05</b> | <b>7.69E-05</b> | -1.76 | (-2.55--0.97) | <b>1.81E-05</b> | <b>5.11E-05</b> | same     |
| PE(O-38:5) (a)       | -1.44 | (-2.16--0.71) | <b>1.14E-04</b> | <b>3.65E-04</b> | -0.89 | (-1.6--0.18)  | <b>1.37E-02</b> | <b>2.25E-02</b> | same     |
| PE(O-38:5) (b)       | -1.98 | (-2.64--1.31) | <b>9.88E-09</b> | <b>6.87E-08</b> | -1.06 | (-1.81--0.29) | <b>6.73E-03</b> | <b>1.19E-02</b> | same     |
| PE(O-16:0/22:6)      | -1.03 | (-1.66--0.4)  | <b>1.52E-03</b> | <b>3.67E-03</b> | -0.83 | (-1.53--0.13) | <b>2.05E-02</b> | <b>3.21E-02</b> | same     |
| PE(O-18:0/22:6)      | -1.54 | (-2.14--0.93) | <b>1.02E-06</b> | <b>5.01E-06</b> | -1.41 | (-2.04--0.77) | <b>1.78E-05</b> | <b>5.04E-05</b> | same     |
| PE(O-18:1/22:6)      | -1.16 | (-1.76--0.56) | <b>1.73E-04</b> | <b>5.35E-04</b> | -1.29 | (-1.9--0.67)  | <b>5.13E-05</b> | <b>1.35E-04</b> | same     |
| PE(P-16:0/18:1)      | -1.04 | (-1.56--0.52) | <b>1.03E-04</b> | <b>3.35E-04</b> | -0.62 | (-1.13--0.11) | <b>1.76E-02</b> | <b>2.81E-02</b> | same     |
| PE(P-18:0/18:1)      | -1.25 | (-1.84--0.66) | <b>3.98E-05</b> | <b>1.40E-04</b> | -1.01 | (-1.6--0.41)  | <b>9.72E-04</b> | <b>2.07E-03</b> | same     |
| PE(P-18:0/18:2)      | -1.83 | (-2.48--1.19) | <b>4.04E-08</b> | <b>2.66E-07</b> | -1.53 | (-2.15--0.91) | <b>1.62E-06</b> | <b>5.22E-06</b> | same     |
| PE(P-18:0/22:4)      | -0.72 | (-1.31--0.13) | <b>1.74E-02</b> | <b>3.11E-02</b> | -0.98 | (-1.57--0.38) | <b>1.48E-03</b> | <b>3.02E-03</b> | same     |
| PE(P-18:0/22:5) (n6) | -1.29 | (-1.87--0.72) | <b>1.35E-05</b> | <b>5.30E-05</b> | -1.25 | (-1.83--0.67) | <b>3.16E-05</b> | <b>8.48E-05</b> | same     |
| PE(P-18:0/22:6)      | -0.79 | (-1.43--0.14) | <b>1.80E-02</b> | <b>3.18E-02</b> | -1.21 | (-1.87--0.55) | <b>3.71E-04</b> | <b>8.65E-04</b> | same     |
| PE(P-18:1/18:1)      | -0.90 | (-1.45--0.35) | <b>1.43E-03</b> | <b>3.50E-03</b> | -0.83 | (-1.38--0.28) | <b>3.06E-03</b> | <b>5.83E-03</b> | same     |
| PE(P-18:1/18:2)      | -1.86 | (-2.56--1.16) | <b>3.27E-07</b> | <b>1.80E-06</b> | -1.22 | (-1.9--0.53)  | <b>5.96E-04</b> | <b>1.30E-03</b> | same     |
| PE(P-20:0/18:1)      | -1.27 | (-1.89--0.65) | <b>7.01E-05</b> | <b>2.35E-04</b> | -1.14 | (-1.71--0.57) | <b>1.01E-04</b> | <b>2.52E-04</b> | same     |
| PE(P-20:0/18:2)      | -1.81 | (-2.36--1.25) | <b>3.40E-10</b> | <b>4.18E-09</b> | -1.98 | (-2.5--1.45)  | <b>1.04E-12</b> | <b>9.79E-12</b> | same     |
| PE(P-20:0/22:6)      | -0.78 | (-1.31--0.26) | <b>3.71E-03</b> | <b>8.27E-03</b> | -1.89 | (-2.39--1.4)  | <b>3.83E-13</b> | <b>3.92E-12</b> | same     |
| PG(34:2)             | -1.07 | (-1.82--0.31) | <b>6.14E-03</b> | <b>1.28E-02</b> | 1.17  | (0.21-2.14)   | <b>1.72E-02</b> | <b>2.76E-02</b> | opposite |
| PI(16:0/16:0)        | -2.44 | (-3.37--1.51) | <b>4.46E-07</b> | <b>2.38E-06</b> | 1.75  | (0.7-2.81)    | <b>1.12E-03</b> | <b>2.36E-03</b> | opposite |
| PI(16:0_16:1)        | -1.73 | (-2.79--0.66) | <b>1.69E-03</b> | <b>4.01E-03</b> | 3.85  | (2.77-4.94)   | <b>3.76E-12</b> | <b>3.11E-11</b> | opposite |
| PI(18:1_18:2)        | -2.66 | (-3.29--2.03) | <b>1.11E-15</b> | <b>5.91E-14</b> | -1.29 | (-1.97--0.61) | <b>2.16E-04</b> | <b>5.17E-04</b> | same     |
| PI(16:0_20:3) (a)    | -2.16 | (-2.82--1.5)  | <b>3.96E-10</b> | <b>4.64E-09</b> | 0.93  | (0.22-1.65)   | <b>1.07E-02</b> | <b>1.78E-02</b> | opposite |
| PI(16:0_20:3) (b)    | -2.46 | (-3.2--1.72)  | <b>1.99E-10</b> | <b>2.80E-09</b> | 0.86  | (0.13-1.6)    | <b>2.06E-02</b> | <b>3.21E-02</b> | opposite |
| PI(16:0_20:4)        | -1.45 | (-2.03--0.86) | <b>1.88E-06</b> | <b>8.78E-06</b> | 0.99  | (0.36-1.62)   | <b>2.13E-03</b> | <b>4.20E-03</b> | opposite |
| PI(38:6)             | -2.63 | (-3.27--1.98) | <b>1.30E-14</b> | <b>5.19E-13</b> | -0.89 | (-1.56--0.21) | <b>1.01E-02</b> | <b>1.70E-02</b> | same     |
| PI(18:0_22:5) (n3)   | -1.73 | (-2.4--1.06)  | <b>5.69E-07</b> | <b>2.91E-06</b> | 0.86  | (0.2-1.52)    | <b>1.06E-02</b> | <b>1.78E-02</b> | opposite |

**Table S3B.** The overlapping lipid species between the ppBMI and birth weight studies. Related to Figure 3.

| Lipid Species                             | ppBMI (antenatal)                           |               |                 |                 | Birth Weight (cord blood)                    |               |                 |                 | Trend    |
|-------------------------------------------|---------------------------------------------|---------------|-----------------|-----------------|----------------------------------------------|---------------|-----------------|-----------------|----------|
|                                           | %change in lipid concentration per unit BMI | 95%CI         | p-value         | p-value(BH)     | %change in lipid concentration per 100 grams | 95%CI         | p-value         | p-value(BH)     |          |
| AC(14:1)                                  | 1.38                                        | (0.22-2.56)   | <b>1.98E-02</b> | <b>3.50E-02</b> | -1.08                                        | (-1.73--0.37) | <b>3.63E-03</b> | <b>8.13E-03</b> | opposite |
| AC(16:1)                                  | 1.19                                        | (0.37-2.02)   | <b>4.39E-03</b> | <b>9.66E-03</b> | -1.00                                        | (-1.64--0.31) | <b>5.17E-03</b> | <b>1.12E-02</b> | opposite |
| CE(16:1)                                  | -1.06                                       | (-1.82--0.29) | <b>7.23E-03</b> | <b>1.46E-02</b> | 0.98                                         | (0.31-1.69)   | <b>3.55E-03</b> | <b>8.00E-03</b> | opposite |
| CE(20:2)                                  | -1.33                                       | (-1.74--0.91) | <b>7.59E-10</b> | <b>7.92E-09</b> | 0.79                                         | (0.16-1.46)   | <b>1.36E-02</b> | <b>2.71E-02</b> | opposite |
| CE(20:5)                                  | -1.71                                       | (-3.04--0.36) | <b>1.31E-02</b> | <b>2.41E-02</b> | -2.42                                        | (-3.39--1.3)  | <b>9.07E-05</b> | <b>2.59E-04</b> | same     |
| CE(22:6)                                  | -1.55                                       | (-2.27--0.82) | <b>3.29E-05</b> | <b>1.18E-04</b> | -1.97                                        | (-2.73--1.12) | <b>1.95E-05</b> | <b>6.12E-05</b> | same     |
| CE(24:5)                                  | -2.01                                       | (-2.72--1.3)  | <b>4.73E-08</b> | <b>3.03E-07</b> | -2.88                                        | (-3.68--1.98) | <b>3.40E-08</b> | <b>1.41E-07</b> | same     |
| CE(24:6)                                  | -2.55                                       | (-3.28--1.82) | <b>2.50E-11</b> | <b>4.44E-10</b> | -1.14                                        | (-2.05--0.14) | <b>2.66E-02</b> | <b>4.98E-02</b> | same     |
| DG(16:0_18:1)                             | 1.33                                        | (0.59-2.07)   | <b>4.36E-04</b> | <b>1.22E-03</b> | -1.91                                        | (-2.57--1.19) | <b>1.35E-06</b> | <b>4.62E-06</b> | opposite |
| DG(16:0_18:2)                             | 0.92                                        | (0.21-1.65)   | <b>1.15E-02</b> | <b>2.16E-02</b> | -3.07                                        | (-3.76--2.31) | <b>1.09E-11</b> | <b>6.22E-11</b> | opposite |
| DG(18:0_18:1)                             | 1.36                                        | (0.69-2.04)   | <b>7.91E-05</b> | <b>2.60E-04</b> | -1.29                                        | (-1.99--0.53) | <b>1.23E-03</b> | <b>2.94E-03</b> | opposite |
| DG(18:1_18:1)                             | 1.37                                        | (0.64-2.1)    | <b>2.23E-04</b> | <b>6.69E-04</b> | -1.85                                        | (-2.5--1.16)  | <b>1.20E-06</b> | <b>4.16E-06</b> | opposite |
| DG(18:0_18:2)                             | 0.99                                        | (0.23-1.76)   | <b>1.04E-02</b> | <b>1.97E-02</b> | -1.62                                        | (-2.52--0.61) | <b>2.43E-03</b> | <b>5.62E-03</b> | opposite |
| DG(18:1_18:2)                             | 0.95                                        | (0.22-1.68)   | <b>1.02E-02</b> | <b>1.97E-02</b> | -3.15                                        | (-3.76--2.48) | <b>8.45E-15</b> | <b>7.12E-14</b> | opposite |
| DG(16:0_20:4)                             | 1.19                                        | (0.26-2.12)   | <b>1.22E-02</b> | <b>2.27E-02</b> | -2.06                                        | (-2.83--1.21) | <b>9.20E-06</b> | <b>2.95E-05</b> | opposite |
| DG(18:1_20:4)                             | 1.14                                        | (0.4-1.88)    | <b>2.42E-03</b> | <b>5.53E-03</b> | -2.06                                        | (-2.71--1.36) | <b>1.08E-07</b> | <b>4.14E-07</b> | opposite |
| DG(18:1_22:6)                             | 1.53                                        | (0.47-2.61)   | <b>4.63E-03</b> | <b>9.97E-03</b> | -3.49                                        | (-4.15--2.76) | <b>7.44E-15</b> | <b>6.49E-14</b> | opposite |
| DG(18:2_22:6)                             | 1.52                                        | (0.42-2.63)   | <b>6.55E-03</b> | <b>1.35E-02</b> | -4.00                                        | (-4.74--3.16) | <b>9.00E-14</b> | <b>6.75E-13</b> | opposite |
| TG(48:0) [NL-18:0]                        | -1.56                                       | (-2.43--0.68) | <b>5.76E-04</b> | <b>1.53E-03</b> | -1.44                                        | (-2.28--0.51) | <b>3.14E-03</b> | <b>7.14E-03</b> | same     |
| TG(48:2) [NL-14:1]                        | -1.20                                       | (-2.25--0.13) | <b>2.78E-02</b> | <b>4.70E-02</b> | -3.06                                        | (-3.81--2.23) | <b>4.50E-10</b> | <b>2.23E-09</b> | same     |
| TG(48:2) [NL-18:2]                        | -1.16                                       | (-2.2--0.12)  | <b>2.91E-02</b> | <b>4.87E-02</b> | -4.14                                        | (-4.86--3.32) | <b>5.42E-15</b> | <b>4.91E-14</b> | same     |
| TG(48:3) [NL-14:0]                        | -1.51                                       | (-2.64--0.37) | <b>9.55E-03</b> | <b>1.85E-02</b> | -4.04                                        | (-4.73--3.26) | <b>1.02E-15</b> | <b>1.04E-14</b> | same     |
| TG(48:3) [NL-18:3]                        | -1.81                                       | (-3.07--0.53) | <b>5.76E-03</b> | <b>1.21E-02</b> | -3.23                                        | (-3.91--2.48) | <b>8.75E-13</b> | <b>5.83E-12</b> | same     |
| TG(50:1) [NL-16:0]                        | 0.83                                        | (0.22-1.43)   | <b>7.27E-03</b> | <b>1.46E-02</b> | -2.49                                        | (-3.25--1.64) | <b>2.17E-07</b> | <b>8.15E-07</b> | opposite |
| TG(50:1) [NL-18:1]                        | 0.76                                        | (0.18-1.34)   | <b>1.03E-02</b> | <b>1.97E-02</b> | -2.47                                        | (-3.24--1.62) | <b>2.61E-07</b> | <b>9.63E-07</b> | opposite |
| TG(50:2) [NL-14:0]                        | -0.65                                       | (-1.21--0.07) | <b>2.69E-02</b> | <b>4.57E-02</b> | -3.34                                        | (-4.1--2.48)  | <b>1.16E-10</b> | <b>6.01E-10</b> | same     |
| TG(50:2) [NL-18:2]                        | 0.66                                        | (0.08-1.24)   | <b>2.58E-02</b> | <b>4.41E-02</b> | -4.17                                        | (-4.92--3.31) | <b>5.26E-14</b> | <b>4.14E-13</b> | opposite |
| TG(52:1) [NL-18:0]                        | 1.38                                        | (0.59-2.18)   | <b>6.58E-04</b> | <b>1.73E-03</b> | -1.86                                        | (-2.76--0.83) | <b>6.81E-04</b> | <b>1.69E-03</b> | opposite |
| TG(52:1) [NL-18:1]                        | 1.45                                        | (0.69-2.23)   | <b>2.04E-04</b> | <b>6.17E-04</b> | -1.80                                        | (-2.71--0.77) | <b>9.96E-04</b> | <b>2.41E-03</b> | opposite |
| TG(52:2) [NL-16:0]                        | 0.80                                        | (0.4-1.21)    | <b>1.01E-04</b> | <b>3.29E-04</b> | -2.79                                        | (-3.44--2.07) | <b>3.12E-11</b> | <b>1.68E-10</b> | opposite |
| TG(52:3) [NL-18:2]                        | 0.76                                        | (0.32-1.2)    | <b>8.08E-04</b> | <b>2.08E-03</b> | -4.40                                        | (-5.07--3.64) | <b>3.04E-18</b> | <b>4.87E-17</b> | opposite |
| TG(52:4) [NL-18:2]                        | 1.20                                        | (0.44-1.96)   | <b>1.92E-03</b> | <b>4.52E-03</b> | -4.97                                        | (-5.63--4.21) | <b>2.07E-20</b> | <b>5.23E-19</b> | opposite |
| TG(53:2) [NL-18:1]                        | 0.88                                        | (0.2-1.56)    | <b>1.08E-02</b> | <b>2.03E-02</b> | -2.69                                        | (-3.33--1.98) | <b>5.26E-11</b> | <b>2.81E-10</b> | opposite |
| TG(54:1) [NL-18:1]                        | 0.99                                        | (0.32-1.66)   | <b>3.57E-03</b> | <b>8.00E-03</b> | -1.64                                        | (-2.56--0.59) | <b>2.89E-03</b> | <b>6.61E-03</b> | opposite |
| TG(54:2) [NL-18:0]                        | 1.41                                        | (0.72-2.1)    | <b>6.55E-05</b> | <b>2.23E-04</b> | -1.85                                        | (-2.69--0.91) | <b>2.40E-04</b> | <b>6.39E-04</b> | opposite |
| TG(54:3) [NL-18:2]                        | 0.72                                        | (0.14-1.3)    | <b>1.43E-02</b> | <b>2.59E-02</b> | -3.06                                        | (-3.75--2.3)  | <b>1.28E-11</b> | <b>7.23E-11</b> | opposite |
| TG(54:5) [NL-20:4]                        | 1.04                                        | (0.38-1.71)   | <b>1.91E-03</b> | <b>4.51E-03</b> | -3.73                                        | (-4.49--2.86) | <b>4.40E-12</b> | <b>2.64E-11</b> | opposite |
| TG(54:6) [NL-20:4]                        | 1.16                                        | (0.33-2)      | <b>6.24E-03</b> | <b>1.29E-02</b> | -4.11                                        | (-4.83--3.28) | <b>1.19E-14</b> | <b>9.81E-14</b> | opposite |
| TG(54:6) [NL-22:6]                        | 1.79                                        | (0.57-3.02)   | <b>4.10E-03</b> | <b>9.06E-03</b> | -5.16                                        | (-5.83--4.38) | <b>1.98E-20</b> | <b>5.23E-19</b> | opposite |
| TG(56:6) [NL-20:4]                        | 1.34                                        | (0.81-1.87)   | <b>7.12E-07</b> | <b>3.60E-06</b> | -3.00                                        | (-3.77--2.15) | <b>1.89E-09</b> | <b>8.92E-09</b> | opposite |
| TG(56:7) [NL-20:4]                        | 1.02                                        | (0.35-1.7)    | <b>2.84E-03</b> | <b>6.40E-03</b> | -3.66                                        | (-4.41--2.81) | <b>3.38E-12</b> | <b>2.08E-11</b> | opposite |
| TG(56:7) [NL-22:6]                        | 1.93                                        | (0.84-3.04)   | <b>4.97E-04</b> | <b>1.35E-03</b> | -5.07                                        | (-5.72--4.33) | <b>1.85E-21</b> | <b>7.12E-20</b> | opposite |
| TG(56:8) [NL-22:6]                        | 1.76                                        | (0.54-2.99)   | <b>4.49E-03</b> | <b>9.76E-03</b> | -5.36                                        | (-5.97--4.65) | <b>1.69E-24</b> | <b>1.02E-22</b> | opposite |
| TG(58:8) [NL-22:6]                        | 1.46                                        | (0.38-2.56)   | <b>7.98E-03</b> | <b>1.58E-02</b> | -4.50                                        | (-5.16--3.76) | <b>3.67E-19</b> | <b>7.05E-18</b> | opposite |
| TG(O-54:2) [NL-18:1]                      | 0.85                                        | (0.18-1.53)   | <b>1.33E-02</b> | <b>2.43E-02</b> | -2.66                                        | (-3.31--1.95) | <b>1.06E-10</b> | <b>5.53E-10</b> | opposite |
| Cer(d16:1/22:0)                           | -0.73                                       | (-1.33--0.13) | <b>1.79E-02</b> | <b>3.18E-02</b> | -1.03                                        | (-1.75--0.25) | <b>1.07E-02</b> | <b>2.19E-02</b> | same     |
| Cer(d17:1/24:0)                           | -2.19                                       | (-2.76--1.61) | <b>4.35E-13</b> | <b>1.39E-11</b> | -1.07                                        | (-1.78--0.28) | <b>8.53E-03</b> | <b>1.79E-02</b> | same     |
| Cer(d19:1/24:0)                           | -1.22                                       | (-2.12--0.32) | <b>8.01E-03</b> | <b>1.58E-02</b> | -1.23                                        | (-2.03--0.34) | <b>7.85E-03</b> | <b>1.67E-02</b> | same     |
| Cer(m18:0/24:1)                           | 1.15                                        | (0.26-2.04)   | <b>1.11E-02</b> | <b>2.08E-02</b> | -1.46                                        | (-2.42--0.37) | <b>9.81E-03</b> | <b>2.02E-02</b> | opposite |
| Cer(m18:1/24:1)                           | 1.37                                        | (0.47-2.27)   | <b>2.70E-03</b> | <b>6.11E-03</b> | -2.16                                        | (-2.91--1.32) | <b>3.30E-06</b> | <b>1.10E-05</b> | opposite |
| GM3(d18:1/18:0)                           | -1.16                                       | (-1.7--0.62)  | <b>2.65E-05</b> | <b>9.76E-05</b> | -0.78                                        | (-1.37--0.16) | <b>1.53E-02</b> | <b>3.01E-02</b> | same     |
| SM(d17:1/14:0)                            | -1.88                                       | (-2.45--1.3)  | <b>3.06E-10</b> | <b>3.86E-09</b> | -0.98                                        | (-1.49--0.44) | <b>5.42E-04</b> | <b>1.36E-03</b> | same     |
| SM(d17:1/16:0)                            | -1.40                                       | (-1.85--0.95) | <b>2.57E-09</b> | <b>2.25E-08</b> | -0.98                                        | (-1.47--0.47) | <b>2.86E-04</b> | <b>7.59E-04</b> | same     |
| SM(37:1)                                  | -0.75                                       | (-1.3--0.2)   | <b>7.20E-03</b> | <b>1.46E-02</b> | -0.82                                        | (-1.45--0.15) | <b>1.76E-02</b> | <b>3.42E-02</b> | same     |
| SM(37:2)                                  | -1.21                                       | (-1.81--0.6)  | <b>1.07E-04</b> | <b>3.46E-04</b> | -0.76                                        | (-1.35--0.12) | <b>2.06E-02</b> | <b>3.93E-02</b> | same     |
| SM(40:3) (b)                              | -0.91                                       | (-1.46--0.36) | <b>1.23E-03</b> | <b>3.06E-03</b> | -0.89                                        | (-1.5--0.24)  | <b>8.17E-03</b> | <b>1.72E-02</b> | same     |
| SM(43:1)                                  | -1.62                                       | (-2.09--1.14) | <b>7.20E-11</b> | <b>1.19E-09</b> | -1.04                                        | (-1.74--0.27) | <b>9.36E-03</b> | <b>1.94E-02</b> | same     |
| LPC(15:0) [sn2]                           | -1.50                                       | (-2.11--0.88) | <b>2.82E-06</b> | <b>1.29E-05</b> | 1.04                                         | (0.46-1.66)   | <b>3.62E-04</b> | <b>9.45E-04</b> | opposite |
| LPC(15:0) [sn1]                           | -1.28                                       | (-1.83--0.72) | <b>8.57E-06</b> | <b>3.58E-05</b> | 0.76                                         | (0.24-1.32)   | <b>4.17E-03</b> | <b>9.24E-03</b> | opposite |
| LPC(17:1) [sn1] (a) / LPC(17:1) [sn2] (b) | -0.95                                       | (-1.52--0.37) | <b>1.28E-03</b> | <b>3.14E-03</b> | 1.72                                         | (1.09-2.4)    | <b>3.10E-08</b> | <b>1.29E-07</b> | opposite |
| LPC(18:1) [sn2]                           | -0.59                                       | (-1.11--0.07) | <b>2.69E-02</b> | <b>4.57E-02</b> | 3.61                                         | (2.91-4.34)   | <b>4.61E-28</b> | <b>5.53E-26</b> | opposite |
| LPC(18:2) [sn2]                           | -0.64                                       | (-1.13--0.15) | <b>1.04E-02</b> | <b>1.97E-02</b> | 2.93                                         | (2.22-3.69)   | <b>4.36E-18</b> | <b>6.75E-17</b> | opposite |
| LPC(18:3) [sn2] (a)                       | -1.54                                       | (-2.23--0.85) | <b>1.68E-05</b> | <b>6.51E-05</b> | 2.31                                         | (1.65-3.01)   | <b>5.03E-13</b> | <b>3.55E-12</b> | opposite |

|                                           |       |               |          |          |       |               |          |          |          |
|-------------------------------------------|-------|---------------|----------|----------|-------|---------------|----------|----------|----------|
| LPC(18:3) [sn1] (a)/LPC(18:3) [sn2] (b)   | -0.95 | (-1.67--0.23) | 9.74E-03 | 1.88E-02 | 4.43  | (3.51-5.42)   | 1.76E-25 | 1.41E-23 | opposite |
| LPC(18:3) (a) [sn1] [104_sn1]             | -0.94 | (-1.68--0.2)  | 1.34E-02 | 2.43E-02 | 4.09  | (3.21-5.02)   | 1.27E-23 | 6.77E-22 | opposite |
| LPC(20:1) [sn2]                           | -0.60 | (-1.07--0.14) | 1.07E-02 | 2.02E-02 | 1.44  | (0.92-1.98)   | 1.54E-08 | 6.60E-08 | opposite |
| LPC(20:1) [sn1]                           | -0.62 | (-1.08--0.15) | 9.49E-03 | 1.84E-02 | 1.75  | (1.27-2.25)   | 1.55E-13 | 1.12E-12 | opposite |
| LPC(20:2) [sn2]                           | -0.91 | (-1.41--0.4)  | 4.81E-04 | 1.32E-03 | 3.83  | (3.05-4.65)   | 3.73E-26 | 3.58E-24 | opposite |
| LPC(20:2) [sn1]                           | -0.63 | (-1.11--0.16) | 9.14E-03 | 1.78E-02 | 3.35  | (2.66-4.06)   | 4.61E-25 | 3.16E-23 | opposite |
| LPC(20:3) [sn2]                           | 1.05  | (0.4-1.7)     | 1.48E-03 | 3.59E-03 | 2.58  | (1.91-3.3)    | 1.79E-15 | 1.72E-14 | same     |
| LPC(20:3) [sn1]                           | 1.28  | (0.59-1.97)   | 2.78E-04 | 8.08E-04 | 3.27  | (2.53-4.05)   | 7.83E-21 | 2.50E-19 | same     |
| LPC(20:3) [104_sn1]                       | 1.42  | (0.72-2.12)   | 7.46E-05 | 2.47E-04 | 3.22  | (2.49-3.99)   | 9.49E-21 | 2.85E-19 | same     |
| LPC(20:4) [sn2]                           | 0.85  | (0.33-1.37)   | 1.45E-03 | 3.53E-03 | 2.39  | (1.75-3.06)   | 6.31E-15 | 5.61E-14 | same     |
| LPC(20:4) [sn1]                           | 1.36  | (0.79-1.93)   | 3.16E-06 | 1.42E-05 | 2.66  | (1.98-3.38)   | 2.33E-16 | 2.60E-15 | same     |
| LPC(22:5) [sn2] (n3)                      | -0.98 | (-1.6--0.35)  | 2.21E-03 | 5.12E-03 | 1.73  | (0.89-2.63)   | 2.63E-05 | 8.04E-05 | opposite |
| LPC(22:5) [sn1] (n3)/LPC(22:5) [sn2] (n6) | -0.84 | (-1.42--0.26) | 4.63E-03 | 9.97E-03 | 2.12  | (1.41-2.88)   | 6.79E-10 | 3.29E-09 | opposite |
| LPC(O-18:1)                               | 0.52  | (0.07-0.97)   | 2.38E-02 | 4.13E-02 | 1.82  | (1.3-2.37)    | 7.59E-13 | 5.13E-12 | same     |
| LPC(O-22:1)                               | -1.62 | (-2.15--1.1)  | 2.73E-09 | 2.33E-08 | 1.29  | (0.72-1.9)    | 6.07E-06 | 1.97E-05 | opposite |
| LPC(P-18:1)                               | 0.95  | (0.36-1.54)   | 1.57E-03 | 3.78E-03 | 1.25  | (0.59-1.95)   | 1.32E-04 | 3.64E-04 | same     |
| LPC(P-20:0)                               | -0.73 | (-1.3--0.15)  | 1.34E-02 | 2.43E-02 | 2.02  | (1.36-2.71)   | 3.08E-10 | 1.54E-09 | opposite |
| LPE(16:0) [sn2]                           | -0.58 | (-1.09--0.08) | 2.45E-02 | 4.23E-02 | 2.24  | (1.6-2.92)    | 6.15E-13 | 4.28E-12 | opposite |
| LPE(18:1) [sn2]                           | -0.78 | (-1.33--0.24) | 5.15E-03 | 1.10E-02 | 2.54  | (1.88-3.24)   | 1.28E-15 | 1.28E-14 | opposite |
| LPE(18:1) [sn1]                           | -0.74 | (-1.28--0.2)  | 7.22E-03 | 1.46E-02 | 2.94  | (2.26-3.65)   | 1.02E-19 | 2.33E-18 | opposite |
| LPE(18:2) [sn2]                           | -0.93 | (-1.59--0.27) | 6.21E-03 | 1.29E-02 | 3.65  | (2.71-4.66)   | 9.44E-17 | 1.10E-15 | opposite |
| LPE(18:2) [sn1]                           | -0.96 | (-1.63--0.29) | 5.28E-03 | 1.12E-02 | 3.74  | (2.85-4.69)   | 1.99E-19 | 4.16E-18 | opposite |
| PC(33:0) (b)                              | -1.78 | (-2.34--1.22) | 1.18E-09 | 1.18E-08 | -1.45 | (-2.17--0.66) | 5.09E-04 | 1.30E-03 | same     |
| PC(33:2)                                  | -2.27 | (-2.89--1.64) | 6.00E-12 | 1.37E-10 | -1.25 | (-1.87--0.6)  | 3.06E-04 | 8.08E-04 | same     |
| PC(15-MHDA_18:1)                          | -2.51 | (-3.31--1.72) | 1.39E-09 | 1.34E-08 | -1.26 | (-1.99--0.45) | 2.77E-03 | 6.37E-03 | same     |
| PC(17:0_18:1)                             | -1.99 | (-2.49--1.47) | 1.15E-13 | 3.93E-12 | -1.06 | (-1.56--0.54) | 1.14E-04 | 3.25E-04 | same     |
| PC(15-MHDA_18:2)                          | -1.86 | (-2.67--1.05) | 9.80E-06 | 4.05E-05 | -1.39 | (-2.07--0.66) | 3.55E-04 | 9.32E-04 | same     |
| PC(17:0_18:2)                             | -1.54 | (-2.08--1)    | 3.86E-08 | 2.57E-07 | -1.28 | (-1.84--0.68) | 5.78E-05 | 1.69E-04 | same     |
| PC(17:1_18:2)                             | -1.21 | (-1.75--0.67) | 1.36E-05 | 5.30E-05 | -0.72 | (-1.27--0.14) | 1.54E-02 | 3.03E-02 | same     |
| PC(15:0_20:4)                             | -1.28 | (-1.97--0.58) | 3.68E-04 | 1.06E-03 | -1.32 | (-1.88--0.72) | 3.80E-05 | 1.13E-04 | same     |
| PC(35:5)                                  | -1.57 | (-2.8--0.32)  | 1.38E-02 | 2.50E-02 | -2.33 | (-3.15--1.42) | 4.33E-06 | 1.41E-05 | same     |
| PC(36:6)                                  | -2.22 | (-3.03--1.4)  | 1.62E-07 | 9.83E-07 | -0.83 | (-1.42--0.2)  | 1.07E-02 | 2.19E-02 | same     |
| PC(15:0_22:6)                             | -2.68 | (-3.42--1.94) | 3.93E-12 | 9.43E-11 | -1.88 | (-2.45--1.28) | 1.58E-08 | 6.70E-08 | same     |
| PC(38:2)                                  | -1.13 | (-1.58--0.67) | 1.45E-06 | 6.94E-06 | 0.92  | (0.32-1.55)   | 2.19E-03 | 5.11E-03 | opposite |
| PC(18:0_20:4)                             | 0.98  | (0.35-1.61)   | 2.29E-03 | 5.29E-03 | -1.07 | (-1.65--0.46) | 8.92E-04 | 2.21E-03 | opposite |
| PC(38:5) (a)                              | -1.09 | (-1.59--0.58) | 2.73E-05 | 9.86E-05 | -1.17 | (-1.68--0.63) | 3.91E-05 | 1.15E-04 | same     |
| PC(16:0_22:6)                             | -1.01 | (-1.64--0.37) | 1.94E-03 | 4.55E-03 | -1.25 | (-1.93--0.5)  | 1.40E-03 | 3.31E-03 | same     |
| PC(16:1_22:6)                             | -1.64 | (-2.33--0.96) | 3.49E-06 | 1.54E-05 | -1.04 | (-1.56--0.48) | 4.09E-04 | 1.06E-03 | same     |
| PC(38:7)(c)                               | -1.58 | (-2.17--0.99) | 2.34E-07 | 1.32E-06 | -0.88 | (-1.37--0.37) | 1.02E-03 | 2.45E-03 | same     |
| PC(39:5)(a)                               | -2.53 | (-3.35--1.7)  | 4.56E-09 | 3.53E-08 | -1.98 | (-2.62--1.29) | 2.49E-07 | 9.28E-07 | same     |
| PC(39:5)(b)                               | -2.31 | (-3.04--1.58) | 1.68E-09 | 1.56E-08 | -1.95 | (-2.55--1.29) | 7.31E-08 | 2.90E-07 | same     |
| PC(15-MHDA_22:6)                          | -2.51 | (-3.31--1.7)  | 2.77E-09 | 2.33E-08 | -2.07 | (-2.73--1.36) | 1.67E-07 | 6.31E-07 | same     |
| PC(17:0_22:6)                             | -2.00 | (-2.74--1.26) | 1.87E-07 | 1.08E-06 | -2.24 | (-2.78--1.65) | 1.65E-11 | 9.21E-11 | same     |
| PC(40:8)                                  | -1.77 | (-2.3--1.24)  | 1.86E-10 | 2.70E-09 | 0.83  | (0.2-1.5)     | 9.19E-03 | 1.92E-02 | opposite |
| PC(44:12)                                 | -2.40 | (-3.44--1.34) | 1.14E-05 | 4.60E-05 | -1.02 | (-1.76--0.22) | 1.39E-02 | 2.75E-02 | same     |
| PC(O-18:0/18:1)                           | -1.51 | (-1.98--1.03) | 1.00E-09 | 1.02E-08 | 1.31  | (0.62-2.05)   | 1.35E-04 | 3.71E-04 | opposite |
| PC(O-18:1/18:1)                           | -1.20 | (-1.66--0.74) | 4.16E-07 | 2.24E-06 | 0.71  | (0.11-1.35)   | 2.01E-02 | 3.86E-02 | opposite |
| PC(O-36:5)                                | -1.11 | (-2.09--0.12) | 2.87E-02 | 4.82E-02 | -1.06 | (-1.73--0.34) | 4.52E-03 | 9.91E-03 | same     |
| PC(O-18:0/22:6)                           | -0.69 | (-1.25--0.12) | 1.77E-02 | 3.15E-02 | -0.93 | (-1.43--0.39) | 9.93E-04 | 2.41E-03 | same     |
| PC(P-16:0/18:2)                           | -1.10 | (-1.68--0.5)  | 3.02E-04 | 8.73E-04 | -1.30 | (-1.9--0.66)  | 1.43E-04 | 3.91E-04 | same     |
| PC(P-35:2) (b)                            | -1.83 | (-2.55--1.1)  | 1.07E-06 | 5.20E-06 | -1.45 | (-2.06--0.79) | 3.89E-05 | 1.15E-04 | same     |
| PC(P-18:1/18:1)                           | -1.20 | (-1.72--0.68) | 7.54E-06 | 3.17E-05 | 1.22  | (0.39-2.12)   | 3.50E-03 | 7.92E-03 | opposite |
| PC(P-17:0/20:4) (a)                       | -1.01 | (-1.8--0.22)  | 1.29E-02 | 2.38E-02 | -1.57 | (-2.22--0.86) | 3.59E-05 | 1.08E-04 | same     |
| PC(P-38:5) (b)                            | -0.85 | (-1.43--0.27) | 4.44E-03 | 9.70E-03 | -0.87 | (-1.5--0.2)   | 1.16E-02 | 2.34E-02 | same     |
| PC(P-40:5) (b)                            | -0.80 | (-1.37--0.24) | 5.56E-03 | 1.18E-02 | -0.80 | (-1.31--0.26) | 4.26E-03 | 9.37E-03 | same     |
| PE(17:0_18:2)                             | -1.21 | (-1.9--0.52)  | 6.65E-04 | 1.74E-03 | -0.85 | (-1.35--0.31) | 2.33E-03 | 5.41E-03 | same     |
| PE(18:0_22:6)                             | 1.34  | (0.55-2.14)   | 8.34E-04 | 2.13E-03 | -1.61 | (-2.34--0.8)  | 2.02E-04 | 5.43E-04 | opposite |
| PE(P-16:0/18:1)                           | -1.04 | (-1.56--0.52) | 1.03E-04 | 3.35E-04 | 1.69  | (0.98-2.44)   | 1.11E-06 | 3.90E-06 | opposite |
| PE(P-16:0/22:5) (n6)                      | -0.76 | (-1.4--0.12)  | 2.07E-02 | 3.60E-02 | 0.91  | (0.1-1.79)    | 2.66E-02 | 4.98E-02 | opposite |
| PE(P-18:0/18:1)                           | -1.25 | (-1.84--0.66) | 3.98E-05 | 1.40E-04 | 1.01  | (0.24-1.85)   | 9.34E-03 | 1.94E-02 | opposite |
| PE(P-18:0/20:5)                           | -1.63 | (-2.99--0.26) | 2.00E-02 | 3.52E-02 | -1.97 | (-3.3--0.38)  | 1.77E-02 | 3.42E-02 | same     |
| PE(P-20:0/22:6)                           | -0.78 | (-1.31--0.26) | 3.71E-03 | 8.27E-03 | -0.70 | (-1.25--0.11) | 2.13E-02 | 4.05E-02 | same     |
| PI(34:0)                                  | -2.66 | (-3.58--1.72) | 4.56E-08 | 2.96E-07 | -1.86 | (-2.99--0.54) | 7.41E-03 | 1.58E-02 | same     |
| PI(17:0_18:1)                             | -2.37 | (-2.95--1.79) | 6.39E-15 | 2.79E-13 | -1.30 | (-2.26--0.22) | 1.94E-02 | 3.75E-02 | same     |
| PI(17:0_18:2)                             | -2.70 | (-3.33--2.07) | 4.72E-16 | 2.83E-14 | -1.91 | (-2.87--0.83) | 9.67E-04 | 2.37E-03 | same     |
| PI(18:0_18:1)                             | -1.94 | (-2.65--1.23) | 1.16E-07 | 7.23E-07 | -1.18 | (-1.84--0.46) | 1.71E-03 | 4.02E-03 | same     |
| PI(36:2)                                  | -1.93 | (-2.51--1.34) | 2.53E-10 | 3.28E-09 | -1.22 | (-1.78--0.62) | 1.28E-04 | 3.56E-04 | same     |
| PI(18:1_18:2)                             | -2.66 | (-3.29--2.03) | 1.11E-15 | 5.91E-14 | -1.47 | (-1.98--0.93) | 4.93E-07 | 1.78E-06 | same     |



|                    |       |               |                 |                 |       |               |                 |                 |          |
|--------------------|-------|---------------|-----------------|-----------------|-------|---------------|-----------------|-----------------|----------|
| PI(16:0_20:3) (b)  | -2.46 | (-3.2--1.72)  | <b>1.99E-10</b> | <b>2.80E-09</b> | 2.99  | (1.94-4.14)   | <b>2.09E-09</b> | <b>9.74E-09</b> | opposite |
| PI(18:0_20:2)      | -2.66 | (-3.36--1.95) | <b>6.56E-13</b> | <b>1.85E-11</b> | 2.45  | (1.2-3.85)    | <b>5.83E-05</b> | <b>1.70E-04</b> | opposite |
| PI(18:0_20:4)      | -0.79 | (-1.31--0.28) | <b>2.68E-03</b> | <b>6.09E-03</b> | -0.59 | (-1.01--0.14) | <b>1.08E-02</b> | <b>2.19E-02</b> | same     |
| PI(38:6)           | -2.63 | (-3.27--1.98) | <b>1.30E-14</b> | <b>5.19E-13</b> | -0.92 | (-1.44--0.37) | <b>1.31E-03</b> | <b>3.11E-03</b> | same     |
| PI(18:0_22:4)      | -1.24 | (-1.89--0.58) | <b>2.27E-04</b> | <b>6.78E-04</b> | 1.20  | (0.52-1.92)   | <b>4.03E-04</b> | <b>1.05E-03</b> | opposite |
| PI(18:0_22:5) (n3) | -1.73 | (-2.4--1.06)  | <b>5.69E-07</b> | <b>2.91E-06</b> | -1.24 | (-1.88--0.56) | <b>5.87E-04</b> | <b>1.47E-03</b> | same     |
| PI(18:0_22:6)      | -2.03 | (-2.68--1.38) | <b>2.31E-09</b> | <b>2.05E-08</b> | -1.11 | (-1.63--0.55) | <b>1.59E-04</b> | <b>4.30E-04</b> | same     |

**Table S3C.** The overlapping lipid species between the birth weight and 6-year-old child BMI studies. Related to Figure 3.

| Lipid Species      | Birth Weight (cord blood)                    |               |                 |                 | Child BMI (6-year-old)                      |               |                 |                 | Trend    |
|--------------------|----------------------------------------------|---------------|-----------------|-----------------|---------------------------------------------|---------------|-----------------|-----------------|----------|
|                    | %change in lipid concentration per 100 grams | 95%CI         | p-value         | p-value(BH)     | %change in lipid concentration per unit BMI | 95%CI         | p-value         | p-value(BH)     |          |
| AC(18:0)           | -0.78                                        | (-1.3--0.24)  | <b>5.68E-03</b> | <b>1.22E-02</b> | -1.98                                       | (-3.33--0.62) | <b>4.60E-03</b> | <b>1.97E-02</b> | same     |
| CE(16:1)           | 0.98                                         | (0.31-1.69)   | <b>3.55E-03</b> | <b>8.00E-03</b> | 5.77                                        | (4.04-7.53)   | <b>9.25E-11</b> | <b>2.22E-08</b> | same     |
| DG(16:0_16:1)      | -1.32                                        | (-2.11--0.45) | <b>3.64E-03</b> | <b>8.13E-03</b> | 6.21                                        | (3.58-8.89)   | <b>3.25E-06</b> | <b>8.67E-05</b> | opposite |
| DG(14:0_18:2)      | -3.08                                        | (-4.04--1.96) | <b>1.68E-06</b> | <b>5.70E-06</b> | 6.70                                        | (3.02-10.51)  | <b>3.23E-04</b> | <b>2.28E-03</b> | opposite |
| DG(16:0_18:1)      | -1.91                                        | (-2.57--1.19) | <b>1.35E-06</b> | <b>4.62E-06</b> | 3.90                                        | (1.38-6.49)   | <b>2.40E-03</b> | <b>1.18E-02</b> | opposite |
| DG(16:1_18:1)      | -2.08                                        | (-2.77--1.32) | <b>7.91E-07</b> | <b>2.84E-06</b> | 6.17                                        | (3.26-9.17)   | <b>2.92E-05</b> | <b>4.64E-04</b> | opposite |
| DG(16:0_18:2)      | -3.07                                        | (-3.76--2.31) | <b>1.09E-11</b> | <b>6.22E-11</b> | 4.00                                        | (1.57-6.48)   | <b>1.20E-03</b> | <b>6.49E-03</b> | opposite |
| DG(18:0_18:1)      | -1.29                                        | (-1.99--0.53) | <b>1.23E-03</b> | <b>2.94E-03</b> | 4.06                                        | (1.71-6.46)   | <b>6.87E-04</b> | <b>4.23E-03</b> | opposite |
| DG(18:0_18:2)      | -1.62                                        | (-2.52--0.61) | <b>2.43E-03</b> | <b>5.62E-03</b> | 3.76                                        | (1.3-6.29)    | <b>2.68E-03</b> | <b>1.27E-02</b> | opposite |
| DG(16:0_20:4)      | -2.06                                        | (-2.83--1.21) | <b>9.20E-06</b> | <b>2.95E-05</b> | 4.97                                        | (2.34-7.66)   | <b>1.98E-04</b> | <b>1.61E-03</b> | opposite |
| DG(18:1_20:4)      | -2.06                                        | (-2.71--1.36) | <b>1.08E-07</b> | <b>4.14E-07</b> | 3.90                                        | (1.68-6.16)   | <b>5.47E-04</b> | <b>3.60E-03</b> | opposite |
| DG(16:0_22:5)      | -1.95                                        | (-2.72--1.09) | <b>2.99E-05</b> | <b>9.02E-05</b> | 4.60                                        | (2.03-7.23)   | <b>4.22E-04</b> | <b>2.89E-03</b> | opposite |
| DG(18:2_20:4)      | -3.14                                        | (-3.87--2.33) | <b>7.74E-11</b> | <b>4.08E-10</b> | 4.23                                        | (1.78-6.73)   | <b>6.78E-04</b> | <b>4.23E-03</b> | opposite |
| DG(16:0_22:6)      | -4.09                                        | (-4.76--3.33) | <b>6.80E-17</b> | <b>8.37E-16</b> | 5.50                                        | (2.13-8.99)   | <b>1.31E-03</b> | <b>6.84E-03</b> | opposite |
| DG(18:1_22:6)      | -3.49                                        | (-4.15--2.76) | <b>7.44E-15</b> | <b>6.49E-14</b> | 4.14                                        | (1.32-7.04)   | <b>3.88E-03</b> | <b>1.73E-02</b> | opposite |
| DG(18:2_22:6)      | -4.00                                        | (-4.74--3.16) | <b>9.00E-14</b> | <b>6.75E-13</b> | 4.79                                        | (1.45-8.24)   | <b>4.80E-03</b> | <b>2.04E-02</b> | opposite |
| TG(48:0) [NL-18:0] | -1.44                                        | (-2.28--0.51) | <b>3.14E-03</b> | <b>7.14E-03</b> | 7.45                                        | (3.74-11.29)  | <b>7.09E-05</b> | <b>8.54E-04</b> | opposite |
| TG(48:1) [NL-16:1] | -2.43                                        | (-3.32--1.41) | <b>1.61E-05</b> | <b>5.11E-05</b> | 9.58                                        | (5.88-13.41)  | <b>2.99E-07</b> | <b>1.32E-05</b> | opposite |
| TG(48:1) [NL-18:1] | -3.15                                        | (-3.94--2.26) | <b>2.16E-09</b> | <b>9.86E-09</b> | 8.20                                        | (3.97-12.59)  | <b>1.20E-04</b> | <b>1.17E-03</b> | opposite |
| TG(48:2) [NL-14:0] | -3.76                                        | (-4.46--2.97) | <b>4.13E-14</b> | <b>3.31E-13</b> | 8.73                                        | (4.41-13.22)  | <b>6.10E-05</b> | <b>7.91E-04</b> | opposite |
| TG(48:2) [NL-14:1] | -3.06                                        | (-3.81--2.23) | <b>4.50E-10</b> | <b>2.23E-09</b> | 8.90                                        | (4.81-13.16)  | <b>1.61E-05</b> | <b>3.36E-04</b> | opposite |
| TG(48:2) [NL-16:1] | -2.85                                        | (-3.65--1.96) | <b>3.48E-08</b> | <b>1.43E-07</b> | 10.74                                       | (6.57-15.07)  | <b>3.03E-07</b> | <b>1.32E-05</b> | opposite |
| TG(48:2) [NL-18:2] | -4.14                                        | (-4.86--3.32) | <b>5.42E-15</b> | <b>4.91E-14</b> | 8.58                                        | (4.3-13.04)   | <b>7.11E-05</b> | <b>8.54E-04</b> | opposite |
| TG(48:3) [NL-14:0] | -4.04                                        | (-4.73--3.26) | <b>1.02E-15</b> | <b>1.04E-14</b> | 9.53                                        | (5.17-14.08)  | <b>1.43E-05</b> | <b>3.28E-04</b> | opposite |
| TG(48:3) [NL-16:1] | -2.89                                        | (-3.59--2.12) | <b>1.90E-10</b> | <b>9.60E-10</b> | 8.59                                        | (4.99-12.31)  | <b>2.28E-06</b> | <b>6.49E-05</b> | opposite |
| TG(48:3) [NL-18:3] | -3.23                                        | (-3.91--2.48) | <b>8.75E-13</b> | <b>5.83E-12</b> | 8.18                                        | (3.69-12.86)  | <b>3.09E-04</b> | <b>2.27E-03</b> | opposite |
| TG(49:1) [NL-17:1] | -2.19                                        | (-2.84--1.47) | <b>5.29E-08</b> | <b>2.14E-07</b> | 4.94                                        | (2.47-7.47)   | <b>8.54E-05</b> | <b>9.54E-04</b> | opposite |
| TG(50:1) [NL-14:0] | -1.46                                        | (-2.35--0.47) | <b>4.76E-03</b> | <b>1.03E-02</b> | 6.89                                        | (3.47-10.42)  | <b>7.00E-05</b> | <b>8.54E-04</b> | opposite |
| TG(50:1) [NL-16:0] | -2.49                                        | (-3.25--1.64) | <b>2.17E-07</b> | <b>8.15E-07</b> | 4.63                                        | (2.1-7.22)    | <b>3.13E-04</b> | <b>2.27E-03</b> | opposite |
| TG(50:1) [NL-18:1] | -2.47                                        | (-3.24--1.62) | <b>2.61E-07</b> | <b>9.63E-07</b> | 4.17                                        | (1.73-6.68)   | <b>7.99E-04</b> | <b>4.74E-03</b> | opposite |
| TG(50:2) [NL-14:0] | -3.34                                        | (-4.1--2.48)  | <b>1.16E-10</b> | <b>6.01E-10</b> | 4.36                                        | (1.14-7.69)   | <b>7.83E-03</b> | <b>3.01E-02</b> | opposite |
| TG(50:2) [NL-16:1] | -3.01                                        | (-3.81--2.11) | <b>1.08E-08</b> | <b>4.67E-08</b> | 6.45                                        | (3.42-9.58)   | <b>2.79E-05</b> | <b>4.62E-04</b> | opposite |
| TG(50:2) [NL-18:1] | -3.12                                        | (-3.91--2.21) | <b>4.54E-09</b> | <b>2.00E-08</b> | 6.24                                        | (3.2-9.38)    | <b>5.20E-05</b> | <b>7.33E-04</b> | opposite |
| TG(50:2) [NL-18:2] | -4.17                                        | (-4.92--3.31) | <b>5.26E-14</b> | <b>4.14E-13</b> | 4.53                                        | (2.11-7)      | <b>2.30E-04</b> | <b>1.78E-03</b> | opposite |
| TG(50:3) [NL-14:0] | -4.25                                        | (-4.95--3.45) | <b>4.04E-16</b> | <b>4.31E-15</b> | 5.47                                        | (1.88-9.18)   | <b>2.69E-03</b> | <b>1.27E-02</b> | opposite |
| TG(50:3) [NL-14:1] | -2.39                                        | (-3.17--1.51) | <b>1.11E-06</b> | <b>3.90E-06</b> | 4.17                                        | (1.33-7.09)   | <b>3.92E-03</b> | <b>1.73E-02</b> | opposite |
| TG(50:3) [NL-16:1] | -3.88                                        | (-4.58--3.09) | <b>8.11E-15</b> | <b>6.95E-14</b> | 8.28                                        | (4.83-11.85)  | <b>2.15E-06</b> | <b>6.49E-05</b> | opposite |
| TG(50:3) [NL-18:2] | -4.37                                        | (-5.06--3.59) | <b>3.53E-17</b> | <b>4.70E-16</b> | 7.14                                        | (3.78-10.61)  | <b>2.72E-05</b> | <b>4.62E-04</b> | opposite |
| TG(50:3) [NL-18:3] | -3.81                                        | (-4.54--2.98) | <b>2.31E-13</b> | <b>1.65E-12</b> | 6.76                                        | (3.2-10.44)   | <b>1.78E-04</b> | <b>1.52E-03</b> | opposite |
| TG(50:4) [NL-14:0] | -4.31                                        | (-4.97--3.57) | <b>2.52E-18</b> | <b>4.32E-17</b> | 5.22                                        | (1.61-8.96)   | <b>4.43E-03</b> | <b>1.92E-02</b> | opposite |
| TG(50:4) [NL-18:3] | -3.93                                        | (-4.56--3.22) | <b>9.72E-18</b> | <b>1.37E-16</b> | 7.93                                        | (4.25-11.74)  | <b>2.01E-05</b> | <b>4.02E-04</b> | opposite |
| TG(50:4) [NL-20:4] | -3.52                                        | (-4.34--2.57) | <b>6.23E-10</b> | <b>3.05E-09</b> | 10.00                                       | (5.69-14.48)  | <b>3.96E-06</b> | <b>1.00E-04</b> | opposite |
| TG(51:1) [NL-17:0] | -2.72                                        | (-3.44--1.91) | <b>4.45E-09</b> | <b>1.98E-08</b> | 4.90                                        | (2-7.89)      | <b>8.93E-04</b> | <b>5.23E-03</b> | opposite |
| TG(51:2) [NL-17:0] | -3.40                                        | (-4.11--2.6)  | <b>2.54E-12</b> | <b>1.63E-11</b> | 5.48                                        | (2.52-8.52)   | <b>2.67E-04</b> | <b>2.03E-03</b> | opposite |
| TG(51:2) [NL-17:1] | -2.89                                        | (-3.53--2.19) | <b>2.44E-12</b> | <b>1.58E-11</b> | 4.90                                        | (2.22-7.65)   | <b>3.17E-04</b> | <b>2.27E-03</b> | opposite |
| TG(52:1) [NL-18:0] | -1.86                                        | (-2.76--0.83) | <b>6.81E-04</b> | <b>1.69E-03</b> | 5.79                                        | (2.8-8.86)    | <b>1.32E-04</b> | <b>1.22E-03</b> | opposite |
| TG(52:1) [NL-18:1] | -1.80                                        | (-2.71--0.77) | <b>9.96E-04</b> | <b>2.41E-03</b> | 5.71                                        | (2.83-8.68)   | <b>9.59E-05</b> | <b>1.00E-03</b> | opposite |
| TG(52:2) [NL-18:2] | -2.75                                        | (-3.58--1.81) | <b>3.20E-07</b> | <b>1.17E-06</b> | 4.45                                        | (2.1-6.85)    | <b>1.98E-04</b> | <b>1.61E-03</b> | opposite |
| TG(52:3) [NL-16:1] | -3.37                                        | (-4.1--2.56)  | <b>1.00E-11</b> | <b>5.79E-11</b> | 3.39                                        | (0.97-5.88)   | <b>5.95E-03</b> | <b>2.36E-02</b> | opposite |
| TG(52:4) [NL-16:1] | -4.52                                        | (-5.17--3.78) | <b>1.14E-19</b> | <b>2.48E-18</b> | 4.16                                        | (1.08-7.34)   | <b>7.91E-03</b> | <b>3.01E-02</b> | opposite |
| TG(52:4) [NL-18:3] | -4.11                                        | (-4.78--3.35) | <b>9.43E-17</b> | <b>1.10E-15</b> | 4.40                                        | (1.43-7.46)   | <b>3.60E-03</b> | <b>1.63E-02</b> | opposite |
| TG(52:5) [NL-18:3] | -4.16                                        | (-4.81--3.43) | <b>2.87E-18</b> | <b>4.75E-17</b> | 5.19                                        | (2-8.47)      | <b>1.36E-03</b> | <b>6.99E-03</b> | opposite |
| TG(52:5) [NL-20:4] | -3.63                                        | (-4.4--2.74)  | <b>2.19E-11</b> | <b>1.19E-10</b> | 10.03                                       | (6.39-13.8)   | <b>4.75E-08</b> | <b>4.56E-06</b> | opposite |
| TG(52:5) [NL-20:5] | -4.43                                        | (-5.13--3.64) | <b>4.66E-17</b> | <b>5.88E-16</b> | 7.78                                        | (4.53-11.13)  | <b>2.30E-06</b> | <b>6.49E-05</b> | opposite |
| TG(54:1) [NL-18:1] | -1.64                                        | (-2.56--0.59) | <b>2.89E-03</b> | <b>6.61E-03</b> | 3.54                                        | (1.13-6.02)   | <b>3.96E-03</b> | <b>1.73E-02</b> | opposite |
| TG(54:2) [NL-18:0] | -1.85                                        | (-2.69--0.91) | <b>2.40E-04</b> | <b>6.39E-04</b> | 3.30                                        | (0.94-5.71)   | <b>6.02E-03</b> | <b>2.36E-02</b> | opposite |

|                      |       |               |                 |                 |       |               |                 |                 |          |
|----------------------|-------|---------------|-----------------|-----------------|-------|---------------|-----------------|-----------------|----------|
| TG(54:3) [NL-18:2]   | -3.06 | (-3.75--2.3)  | <b>1.28E-11</b> | <b>7.23E-11</b> | 2.32  | (0.48-4.19)   | <b>1.32E-02</b> | <b>4.65E-02</b> | opposite |
| TG(54:4) [NL-20:3]   | -2.73 | (-3.52--1.84) | <b>8.04E-08</b> | <b>3.16E-07</b> | 4.94  | (2.41-7.54)   | <b>1.24E-04</b> | <b>1.19E-03</b> | opposite |
| TG(54:5) [NL-20:4]   | -3.73 | (-4.49--2.86) | <b>4.40E-12</b> | <b>2.64E-11</b> | 5.84  | (3.43-8.3)    | <b>1.90E-06</b> | <b>6.49E-05</b> | opposite |
| TG(54:6) [NL-20:4]   | -4.11 | (-4.83--3.28) | <b>1.19E-14</b> | <b>9.81E-14</b> | 7.52  | (4.68-10.44)  | <b>1.91E-07</b> | <b>1.15E-05</b> | opposite |
| TG(54:6) [NL-20:5]   | -5.04 | (-5.69--4.28) | <b>7.74E-21</b> | <b>2.50E-19</b> | 8.39  | (5.04-11.85)  | <b>7.54E-07</b> | <b>3.02E-05</b> | opposite |
| TG(54:6) [NL-22:6]   | -5.16 | (-5.83--4.38) | <b>1.98E-20</b> | <b>5.23E-19</b> | 8.20  | (4.48-12.06)  | <b>1.29E-05</b> | <b>3.10E-04</b> | opposite |
| TG(54:7) [NL-20:5]   | -4.97 | (-5.63--4.22) | <b>1.23E-20</b> | <b>3.49E-19</b> | 8.46  | (5.22-11.8)   | <b>2.49E-07</b> | <b>1.32E-05</b> | opposite |
| TG(54:7) [NL-22:6]   | -4.92 | (-5.56--4.18) | <b>1.93E-21</b> | <b>7.12E-20</b> | 10.42 | (6.51-14.47)  | <b>1.23E-07</b> | <b>9.83E-06</b> | opposite |
| TG(56:6) [NL-20:4]   | -3.00 | (-3.77--2.15) | <b>1.89E-09</b> | <b>8.92E-09</b> | 3.72  | (1.91-5.57)   | <b>5.78E-05</b> | <b>7.86E-04</b> | opposite |
| TG(56:6) [NL-22:5]   | -3.83 | (-4.52--3.06) | <b>4.63E-15</b> | <b>4.36E-14</b> | 3.96  | (1.82-6.14)   | <b>2.87E-04</b> | <b>2.15E-03</b> | opposite |
| TG(56:7) [NL-20:4]   | -3.66 | (-4.41--2.81) | <b>3.38E-12</b> | <b>2.08E-11</b> | 4.16  | (1.73-6.64)   | <b>7.60E-04</b> | <b>4.56E-03</b> | opposite |
| TG(56:7) [NL-20:5]   | -3.79 | (-4.51--2.97) | <b>1.22E-13</b> | <b>9.04E-13</b> | 5.58  | (2.64-8.6)    | <b>1.82E-04</b> | <b>1.54E-03</b> | opposite |
| TG(56:7) [NL-22:5]   | -4.29 | (-4.93--3.57) | <b>2.43E-19</b> | <b>4.87E-18</b> | 5.15  | (2.46-7.91)   | <b>1.64E-04</b> | <b>1.46E-03</b> | opposite |
| TG(56:7) [NL-22:6]   | -5.07 | (-5.72--4.33) | <b>1.85E-21</b> | <b>7.12E-20</b> | 6.45  | (3.01-10)     | <b>2.16E-04</b> | <b>1.70E-03</b> | opposite |
| TG(56:8) [NL-20:4]   | -2.95 | (-3.72--2.08) | <b>5.67E-09</b> | <b>2.47E-08</b> | 5.12  | (2.54-7.75)   | <b>9.23E-05</b> | <b>1.00E-03</b> | opposite |
| TG(56:8) [NL-20:5]   | -4.13 | (-4.79--3.37) | <b>3.84E-17</b> | <b>4.98E-16</b> | 5.03  | (2.01-8.13)   | <b>1.03E-03</b> | <b>5.94E-03</b> | opposite |
| TG(56:8) [NL-22:6]   | -5.36 | (-5.97--4.65) | <b>1.69E-24</b> | <b>1.02E-22</b> | 7.57  | (4.02-11.24)  | <b>2.51E-05</b> | <b>4.62E-04</b> | opposite |
| TG(56:9) [NL-22:6]   | -4.88 | (-5.5--4.17)  | <b>1.57E-22</b> | <b>7.54E-21</b> | 6.66  | (3.29-10.14)  | <b>9.49E-05</b> | <b>1.00E-03</b> | opposite |
| TG(58:10) [NL-22:6]  | -4.48 | (-5.11--3.76) | <b>3.35E-20</b> | <b>8.05E-19</b> | 5.17  | (1.89-8.56)   | <b>1.90E-03</b> | <b>9.52E-03</b> | opposite |
| TG(58:8) [NL-22:6]   | -4.50 | (-5.16--3.76) | <b>3.67E-19</b> | <b>7.05E-18</b> | 4.73  | (1.39-8.18)   | <b>5.34E-03</b> | <b>2.16E-02</b> | opposite |
| TG(58:9) [NL-22:6]   | -4.76 | (-5.39--4.06) | <b>4.43E-22</b> | <b>1.93E-20</b> | 4.51  | (1.17-7.97)   | <b>7.98E-03</b> | <b>3.02E-02</b> | opposite |
| TG(O-50:1) [NL-17:1] | -2.21 | (-2.88--1.47) | <b>9.38E-08</b> | <b>3.66E-07</b> | 4.99  | (2.47-7.57)   | <b>1.01E-04</b> | <b>1.03E-03</b> | opposite |
| TG(O-52:2) [NL-17:1] | -2.91 | (-3.55--2.2)  | <b>4.20E-12</b> | <b>2.55E-11</b> | 4.89  | (2.19-7.66)   | <b>3.63E-04</b> | <b>2.52E-03</b> | opposite |
| TG(O-52:2) [NL-18:1] | -1.84 | (-2.72--0.85) | <b>5.37E-04</b> | <b>1.36E-03</b> | 5.04  | (2-8.16)      | <b>1.08E-03</b> | <b>6.15E-03</b> | opposite |
| Cer(m18:0/22:0)      | -1.25 | (-2.16--0.23) | <b>1.75E-02</b> | <b>3.42E-02</b> | 2.43  | (0.5-4.39)    | <b>1.34E-02</b> | <b>4.68E-02</b> | opposite |
| Cer(m18:0/24:1)      | -1.46 | (-2.42--0.37) | <b>9.81E-03</b> | <b>2.02E-02</b> | 4.35  | (2.12-6.63)   | <b>1.28E-04</b> | <b>1.20E-03</b> | opposite |
| LPC(14:0) [sn2]      | 1.75  | (1.25-2.26)   | <b>6.35E-13</b> | <b>4.36E-12</b> | 4.86  | (2.45-7.33)   | <b>7.65E-05</b> | <b>8.95E-04</b> | same     |
| LPC(14:0) [sn1]      | 1.62  | (1.14-2.11)   | <b>5.17E-12</b> | <b>3.06E-11</b> | 4.70  | (2.35-7.09)   | <b>8.28E-05</b> | <b>9.46E-04</b> | same     |
| LPC(16:1) [sn2]      | 4.00  | (3.27-4.78)   | <b>3.37E-31</b> | <b>8.10E-29</b> | 5.09  | (3.19-7.03)   | <b>1.66E-07</b> | <b>1.14E-05</b> | same     |
| LPC(16:1) [sn1]      | 3.89  | (3.2-4.61)    | <b>6.09E-33</b> | <b>2.92E-30</b> | 3.93  | (2.1-5.79)    | <b>2.67E-05</b> | <b>4.62E-04</b> | same     |
| LPC(20:1) [sn1]      | 1.75  | (1.27-2.25)   | <b>1.55E-13</b> | <b>1.12E-12</b> | -2.32 | (-3.93--0.7)  | <b>5.46E-03</b> | <b>2.19E-02</b> | opposite |
| LPC(20:3) [sn2]      | 2.58  | (1.91-3.3)    | <b>1.79E-15</b> | <b>1.72E-14</b> | 2.63  | (0.79-4.5)    | <b>4.98E-03</b> | <b>2.10E-02</b> | same     |
| LPC(20:3) [104_sn1]  | 3.22  | (2.49-3.99)   | <b>9.49E-21</b> | <b>2.85E-19</b> | 2.53  | (0.51-4.6)    | <b>1.42E-02</b> | <b>4.91E-02</b> | same     |
| PC(32:1)             | 0.94  | (0.11-1.83)   | <b>2.49E-02</b> | <b>4.70E-02</b> | 3.56  | (1.41-5.75)   | <b>1.12E-03</b> | <b>6.20E-03</b> | same     |
| PC(34:5)             | -1.14 | (-1.93--0.28) | <b>1.10E-02</b> | <b>2.23E-02</b> | 7.01  | (3.69-10.43)  | <b>3.00E-05</b> | <b>4.64E-04</b> | opposite |
| PC(17:0_18:2)        | -1.28 | (-1.84--0.68) | <b>5.78E-05</b> | <b>1.69E-04</b> | -2.03 | (-3.62--0.41) | <b>1.44E-02</b> | <b>4.92E-02</b> | same     |
| PC(16:0_20:5)        | -1.86 | (-2.69--0.94) | <b>1.83E-04</b> | <b>4.92E-04</b> | 3.86  | (0.8-7.01)    | <b>1.32E-02</b> | <b>4.65E-02</b> | opposite |
| PC(36:6)             | -0.83 | (-1.42--0.2)  | <b>1.07E-02</b> | <b>2.19E-02</b> | 4.41  | (1.91-6.97)   | <b>5.17E-04</b> | <b>3.45E-03</b> | opposite |
| PC(18:0_22:6)        | -1.44 | (-2.09--0.74) | <b>1.21E-04</b> | <b>3.40E-04</b> | 3.01  | (0.9-5.18)    | <b>5.22E-03</b> | <b>2.12E-02</b> | opposite |
| PC(O-18:0/18:1)      | 1.31  | (0.62-2.05)   | <b>1.35E-04</b> | <b>3.71E-04</b> | -3.04 | (-4.22--1.85) | <b>1.05E-06</b> | <b>3.88E-05</b> | opposite |
| PC(O-18:1/18:1)      | 0.71  | (0.11-1.35)   | <b>2.01E-02</b> | <b>3.86E-02</b> | -1.86 | (-2.95--0.75) | <b>1.12E-03</b> | <b>6.20E-03</b> | opposite |
| PC(P-35:2) (b)       | -1.45 | (-2.06--0.79) | <b>3.89E-05</b> | <b>1.15E-04</b> | -2.72 | (-4.69--0.7)  | <b>8.59E-03</b> | <b>3.22E-02</b> | same     |
| PE(18:0_22:6)        | -1.61 | (-2.34--0.8)  | <b>2.02E-04</b> | <b>5.43E-04</b> | 3.81  | (1.08-6.61)   | <b>6.06E-03</b> | <b>2.36E-02</b> | opposite |
| PI(18:1_18:2)        | -1.47 | (-1.98--0.93) | <b>4.93E-07</b> | <b>1.78E-06</b> | -3.22 | (-4.99--1.41) | <b>5.62E-04</b> | <b>3.65E-03</b> | same     |

**Table S3D.** The overlapping lipid species between the 6-year-old child BMI and adult (postnatal mother) BMI studies. Related to Figure 3.

| Lipid Species      | Child BMI (6-year-old)                      |               |                 |                 | Adult BMI (postnatal)                       |               |                 |                 | Trend |
|--------------------|---------------------------------------------|---------------|-----------------|-----------------|---------------------------------------------|---------------|-----------------|-----------------|-------|
|                    | %change in lipid concentration per unit BMI | 95%CI         | p-value         | p-value(BH)     | %change in lipid concentration per unit BMI | 95%CI         | p-value         | p-value(BH)     |       |
| AC(18:0)           | -1.98                                       | (-3.33--0.62) | <b>4.60E-03</b> | <b>1.97E-02</b> | -0.68                                       | (-1.13--0.23) | <b>3.16E-03</b> | <b>6.00E-03</b> | same  |
| CE(16:1)           | 5.77                                        | (4.04-7.53)   | <b>9.25E-11</b> | <b>2.22E-08</b> | 2.17                                        | (1.53-2.82)   | <b>6.89E-11</b> | <b>4.60E-10</b> | same  |
| CE(18:3)           | 2.78                                        | (0.7-4.91)    | <b>8.76E-03</b> | <b>3.24E-02</b> | 0.72                                        | (0.11-1.32)   | <b>2.04E-02</b> | <b>3.21E-02</b> | same  |
| DG(16:0_16:1)      | 6.21                                        | (3.58-8.89)   | <b>3.25E-06</b> | <b>8.67E-05</b> | 4.43                                        | (3.46-5.4)    | <b>9.58E-19</b> | <b>4.12E-17</b> | same  |
| DG(14:0_18:2)      | 6.70                                        | (3.02-10.51)  | <b>3.23E-04</b> | <b>2.28E-03</b> | 4.19                                        | (2.86-5.54)   | <b>7.61E-10</b> | <b>4.11E-09</b> | same  |
| DG(16:0_18:1)      | 3.90                                        | (1.38-6.49)   | <b>2.40E-03</b> | <b>1.18E-02</b> | 4.26                                        | (3.33-5.21)   | <b>1.32E-18</b> | <b>4.86E-17</b> | same  |
| DG(16:1_18:1)      | 6.17                                        | (3.26-9.17)   | <b>2.92E-05</b> | <b>4.64E-04</b> | 4.04                                        | (3.07-5.03)   | <b>1.05E-15</b> | <b>1.80E-14</b> | same  |
| DG(16:0_18:2)      | 4.00                                        | (1.57-6.48)   | <b>1.20E-03</b> | <b>6.49E-03</b> | 3.62                                        | (2.72-4.52)   | <b>5.53E-15</b> | <b>7.59E-14</b> | same  |
| DG(18:0_18:1)      | 4.06                                        | (1.71-6.46)   | <b>6.87E-04</b> | <b>4.23E-03</b> | 4.41                                        | (3.51-5.31)   | <b>4.70E-21</b> | <b>4.51E-19</b> | same  |
| DG(18:0_18:2)      | 3.76                                        | (1.3-6.29)    | <b>2.68E-03</b> | <b>1.27E-02</b> | 4.40                                        | (3.41-5.39)   | <b>7.51E-18</b> | <b>2.57E-16</b> | same  |
| DG(16:0_20:4)      | 4.97                                        | (2.34-7.66)   | <b>1.98E-04</b> | <b>1.61E-03</b> | 4.27                                        | (3.25-5.3)    | <b>4.79E-16</b> | <b>9.59E-15</b> | same  |
| DG(18:1_20:4)      | 3.90                                        | (1.68-6.16)   | <b>5.47E-04</b> | <b>3.60E-03</b> | 2.47                                        | (1.71-3.22)   | <b>1.81E-10</b> | <b>1.10E-09</b> | same  |
| DG(16:0_22:5)      | 4.60                                        | (2.03-7.23)   | <b>4.22E-04</b> | <b>2.89E-03</b> | 2.42                                        | (1.46-3.38)   | <b>7.01E-07</b> | <b>2.39E-06</b> | same  |
| DG(18:2_20:4)      | 4.23                                        | (1.78-6.73)   | <b>6.78E-04</b> | <b>4.23E-03</b> | 2.42                                        | (1.55-3.3)    | <b>5.34E-08</b> | <b>2.23E-07</b> | same  |
| DG(16:0_22:6)      | 5.50                                        | (2.13-8.99)   | <b>1.31E-03</b> | <b>6.84E-03</b> | 4.15                                        | (2.87-5.45)   | <b>2.35E-10</b> | <b>1.41E-09</b> | same  |
| DG(18:1_22:6)      | 4.14                                        | (1.32-7.04)   | <b>3.88E-03</b> | <b>1.73E-02</b> | 3.18                                        | (2.04-4.34)   | <b>5.26E-08</b> | <b>2.22E-07</b> | same  |
| DG(18:2_22:6)      | 4.79                                        | (1.45-8.24)   | <b>4.80E-03</b> | <b>2.04E-02</b> | 3.05                                        | (1.87-4.24)   | <b>3.60E-07</b> | <b>1.28E-06</b> | same  |
| TG(48:0) [NL-18:0] | 7.45                                        | (3.74-11.29)  | <b>7.09E-05</b> | <b>8.54E-04</b> | 4.34                                        | (2.99-5.71)   | <b>3.54E-10</b> | <b>2.07E-09</b> | same  |
| TG(48:1) [NL-16:1] | 9.58                                        | (5.88-13.41)  | <b>2.99E-07</b> | <b>1.32E-05</b> | 6.64                                        | (5.32-7.97)   | <b>1.51E-22</b> | <b>3.62E-20</b> | same  |
| TG(48:1) [NL-18:1] | 8.20                                        | (3.97-12.59)  | <b>1.20E-04</b> | <b>1.17E-03</b> | 5.21                                        | (3.76-6.69)   | <b>2.44E-12</b> | <b>2.13E-11</b> | same  |
| TG(48:2) [NL-14:0] | 8.73                                        | (4.41-13.22)  | <b>6.10E-05</b> | <b>7.91E-04</b> | 5.21                                        | (3.73-6.72)   | <b>5.81E-12</b> | <b>4.73E-11</b> | same  |
| TG(48:2) [NL-14:1] | 8.90                                        | (4.81-13.16)  | <b>1.61E-05</b> | <b>3.36E-04</b> | 4.79                                        | (3.42-6.18)   | <b>7.51E-12</b> | <b>5.72E-11</b> | same  |
| TG(48:2) [NL-16:1] | 10.74                                       | (6.57-15.07)  | <b>3.03E-07</b> | <b>1.32E-05</b> | 5.71                                        | (4.32-7.12)   | <b>1.20E-15</b> | <b>1.99E-14</b> | same  |
| TG(48:2) [NL-18:2] | 8.58                                        | (4.3-13.04)   | <b>7.11E-05</b> | <b>8.54E-04</b> | 5.21                                        | (3.68-6.77)   | <b>2.87E-11</b> | <b>2.03E-10</b> | same  |
| TG(48:3) [NL-14:0] | 9.53                                        | (5.17-14.08)  | <b>1.43E-05</b> | <b>3.28E-04</b> | 4.32                                        | (2.9-5.76)    | <b>2.31E-09</b> | <b>1.14E-08</b> | same  |
| TG(48:3) [NL-16:1] | 8.59                                        | (4.99-12.31)  | <b>2.28E-06</b> | <b>6.49E-05</b> | 4.00                                        | (2.79-5.24)   | <b>1.30E-10</b> | <b>8.10E-10</b> | same  |
| TG(48:3) [NL-18:3] | 8.18                                        | (3.69-12.86)  | <b>3.09E-04</b> | <b>2.27E-03</b> | 4.99                                        | (3.41-6.59)   | <b>5.23E-10</b> | <b>2.92E-09</b> | same  |
| TG(49:1) [NL-17:1] | 4.94                                        | (2.47-7.47)   | <b>8.54E-05</b> | <b>9.54E-04</b> | 4.04                                        | (3.11-4.97)   | <b>2.94E-17</b> | <b>8.82E-16</b> | same  |
| TG(50:1) [NL-14:0] | 6.89                                        | (3.47-10.42)  | <b>7.00E-05</b> | <b>8.54E-04</b> | 4.78                                        | (3.52-6.05)   | <b>1.11E-13</b> | <b>1.24E-12</b> | same  |
| TG(50:1) [NL-16:0] | 4.63                                        | (2.1-7.22)    | <b>3.13E-04</b> | <b>2.27E-03</b> | 4.34                                        | (3.39-5.3)    | <b>1.03E-18</b> | <b>4.12E-17</b> | same  |
| TG(50:1) [NL-18:1] | 4.17                                        | (1.73-6.68)   | <b>7.99E-04</b> | <b>4.74E-03</b> | 4.10                                        | (3.16-5.05)   | <b>4.06E-17</b> | <b>1.08E-15</b> | same  |
| TG(50:2) [NL-14:0] | 4.36                                        | (1.14-7.69)   | <b>7.83E-03</b> | <b>3.01E-02</b> | 2.80                                        | (1.76-3.86)   | <b>1.50E-07</b> | <b>5.54E-07</b> | same  |
| TG(50:2) [NL-16:1] | 6.45                                        | (3.42-9.58)   | <b>2.79E-05</b> | <b>4.62E-04</b> | 4.04                                        | (3.07-5.02)   | <b>6.67E-16</b> | <b>1.28E-14</b> | same  |
| TG(50:2) [NL-18:1] | 6.24                                        | (3.2-9.38)    | <b>5.20E-05</b> | <b>7.33E-04</b> | 3.59                                        | (2.65-4.54)   | <b>1.19E-13</b> | <b>1.30E-12</b> | same  |
| TG(50:2) [NL-18:2] | 4.53                                        | (2.11-7)      | <b>2.30E-04</b> | <b>1.78E-03</b> | 3.72                                        | (2.82-4.62)   | <b>8.45E-16</b> | <b>1.53E-14</b> | same  |
| TG(50:3) [NL-14:0] | 5.47                                        | (1.88-9.18)   | <b>2.69E-03</b> | <b>1.27E-02</b> | 3.13                                        | (1.93-4.34)   | <b>2.88E-07</b> | <b>1.04E-06</b> | same  |
| TG(50:3) [NL-14:1] | 4.17                                        | (1.33-7.09)   | <b>3.92E-03</b> | <b>1.73E-02</b> | 2.66                                        | (1.69-3.63)   | <b>7.85E-08</b> | <b>3.14E-07</b> | same  |
| TG(50:3) [NL-16:1] | 8.28                                        | (4.83-11.85)  | <b>2.15E-06</b> | <b>6.49E-05</b> | 4.38                                        | (3.28-5.5)    | <b>1.32E-14</b> | <b>1.67E-13</b> | same  |
| TG(50:3) [NL-18:2] | 7.14                                        | (3.78-10.61)  | <b>2.72E-05</b> | <b>4.62E-04</b> | 3.72                                        | (2.65-4.81)   | <b>1.38E-11</b> | <b>1.00E-10</b> | same  |
| TG(50:3) [NL-18:3] | 6.76                                        | (3.2-10.44)   | <b>1.78E-04</b> | <b>1.52E-03</b> | 5.18                                        | (3.92-6.44)   | <b>8.59E-16</b> | <b>1.53E-14</b> | same  |
| TG(50:4) [NL-14:0] | 5.22                                        | (1.61-8.96)   | <b>4.43E-03</b> | <b>1.92E-02</b> | 2.75                                        | (1.47-4.04)   | <b>2.32E-05</b> | <b>6.36E-05</b> | same  |
| TG(50:4) [NL-18:3] | 7.93                                        | (4.25-11.74)  | <b>2.01E-05</b> | <b>4.02E-04</b> | 4.14                                        | (2.91-5.38)   | <b>5.20E-11</b> | <b>3.51E-10</b> | same  |
| TG(50:4) [NL-20:4] | 10.00                                       | (5.69-14.48)  | <b>3.96E-06</b> | <b>1.00E-04</b> | 5.64                                        | (4.02-7.29)   | <b>8.80E-12</b> | <b>6.60E-11</b> | same  |
| TG(51:1) [NL-17:0] | 4.90                                        | (2-7.89)      | <b>8.93E-04</b> | <b>5.23E-03</b> | 4.54                                        | (3.5-5.59)    | <b>2.82E-17</b> | <b>8.82E-16</b> | same  |
| TG(51:2) [NL-17:0] | 5.48                                        | (2.52-8.52)   | <b>2.67E-04</b> | <b>2.03E-03</b> | 4.07                                        | (3.06-5.09)   | <b>6.13E-15</b> | <b>8.18E-14</b> | same  |
| TG(51:2) [NL-17:1] | 4.90                                        | (2.22-7.65)   | <b>3.17E-04</b> | <b>2.27E-03</b> | 3.80                                        | (2.86-4.74)   | <b>3.86E-15</b> | <b>5.98E-14</b> | same  |
| TG(52:1) [NL-18:0] | 5.79                                        | (2.8-8.86)    | <b>1.32E-04</b> | <b>1.22E-03</b> | 5.69                                        | (4.53-6.86)   | <b>2.15E-21</b> | <b>2.58E-19</b> | same  |
| TG(52:1) [NL-18:1] | 5.71                                        | (2.83-8.68)   | <b>9.59E-05</b> | <b>1.00E-03</b> | 5.86                                        | (4.73-7)      | <b>1.79E-23</b> | <b>8.60E-21</b> | same  |
| TG(52:2) [NL-18:2] | 4.45                                        | (2.1-6.85)    | <b>1.98E-04</b> | <b>1.61E-03</b> | 4.17                                        | (3.27-5.07)   | <b>4.36E-19</b> | <b>2.33E-17</b> | same  |
| TG(52:3) [NL-16:1] | 3.39                                        | (0.97-5.88)   | <b>5.95E-03</b> | <b>2.36E-02</b> | 1.94                                        | (1.21-2.66)   | <b>1.73E-07</b> | <b>6.33E-07</b> | same  |
| TG(52:4) [NL-16:1] | 4.16                                        | (1.08-7.34)   | <b>7.91E-03</b> | <b>3.01E-02</b> | 2.22                                        | (1.27-3.18)   | <b>4.67E-06</b> | <b>1.43E-05</b> | same  |
| TG(52:4) [NL-18:3] | 4.40                                        | (1.43-7.46)   | <b>3.60E-03</b> | <b>1.63E-02</b> | 3.19                                        | (2.17-4.21)   | <b>8.03E-10</b> | <b>4.24E-09</b> | same  |
| TG(52:5) [NL-18:3] | 5.19                                        | (2-8.47)      | <b>1.36E-03</b> | <b>6.99E-03</b> | 2.89                                        | (1.78-4.01)   | <b>3.35E-07</b> | <b>1.20E-06</b> | same  |
| TG(52:5) [NL-20:4] | 10.03                                       | (6.39-13.8)   | <b>4.75E-08</b> | <b>4.56E-06</b> | 5.46                                        | (4.2-6.74)    | <b>3.97E-17</b> | <b>1.08E-15</b> | same  |

|                                           |       |               |          |          |       |               |          |          |      |
|-------------------------------------------|-------|---------------|----------|----------|-------|---------------|----------|----------|------|
| TG(52:5) [NL-20:5]                        | 7.78  | (4.53-11.13)  | 2.30E-06 | 6.49E-05 | 5.06  | (3.69-6.44)   | 4.80E-13 | 4.70E-12 | same |
| TG(54:1) [NL-18:1]                        | 3.54  | (1.13-6.02)   | 3.96E-03 | 1.73E-02 | 4.45  | (3.57-5.34)   | 4.54E-22 | 7.26E-20 | same |
| TG(54:2) [NL-18:0]                        | 3.30  | (0.94-5.71)   | 6.02E-03 | 2.36E-02 | 4.24  | (3.35-5.13)   | 2.72E-20 | 1.63E-18 | same |
| TG(54:3) [NL-18:2]                        | 2.32  | (0.48-4.19)   | 1.32E-02 | 4.65E-02 | 2.23  | (1.57-2.89)   | 5.13E-11 | 3.51E-10 | same |
| TG(54:4) [NL-20:3]                        | 4.94  | (2.41-7.54)   | 1.24E-04 | 1.19E-03 | 3.70  | (2.83-4.58)   | 2.18E-16 | 4.75E-15 | same |
| TG(54:5) [NL-20:4]                        | 5.84  | (3.43-8.3)    | 1.90E-06 | 6.49E-05 | 3.37  | (2.55-4.2)    | 2.12E-15 | 3.39E-14 | same |
| TG(54:6) [NL-20:4]                        | 7.52  | (4.68-10.44)  | 1.91E-07 | 1.15E-05 | 3.69  | (2.71-4.68)   | 2.17E-13 | 2.27E-12 | same |
| TG(54:6) [NL-20:5]                        | 8.39  | (5.04-11.85)  | 7.54E-07 | 3.02E-05 | 3.82  | (2.52-5.13)   | 7.53E-09 | 3.51E-08 | same |
| TG(54:6) [NL-22:6]                        | 8.20  | (4.48-12.06)  | 1.29E-05 | 3.10E-04 | 5.76  | (4.33-7.22)   | 4.96E-15 | 7.00E-14 | same |
| TG(54:7) [NL-20:5]                        | 8.46  | (5.22-11.8)   | 2.49E-07 | 1.32E-05 | 3.45  | (2.17-4.75)   | 1.37E-07 | 5.08E-07 | same |
| TG(54:7) [NL-22:6]                        | 10.42 | (6.51-14.47)  | 1.23E-07 | 9.83E-06 | 5.09  | (3.68-6.52)   | 1.79E-12 | 1.62E-11 | same |
| TG(56:6) [NL-20:4]                        | 3.72  | (1.91-5.57)   | 5.78E-05 | 7.86E-04 | 1.36  | (0.85-1.88)   | 2.38E-07 | 8.65E-07 | same |
| TG(56:6) [NL-22:5]                        | 3.96  | (1.82-6.14)   | 2.87E-04 | 2.15E-03 | 1.99  | (1.2-2.77)    | 7.33E-07 | 2.46E-06 | same |
| TG(56:7) [NL-20:4]                        | 4.16  | (1.73-6.64)   | 7.60E-04 | 4.56E-03 | 1.88  | (1.14-2.62)   | 6.63E-07 | 2.29E-06 | same |
| TG(56:7) [NL-20:5]                        | 5.58  | (2.64-8.6)    | 1.82E-04 | 1.54E-03 | 2.47  | (1.35-3.61)   | 1.56E-05 | 4.46E-05 | same |
| TG(56:7) [NL-22:5]                        | 5.15  | (2.46-7.91)   | 1.64E-04 | 1.46E-03 | 2.55  | (1.61-3.5)    | 1.14E-07 | 4.45E-07 | same |
| TG(56:7) [NL-22:6]                        | 6.45  | (3.01-10)     | 2.16E-04 | 1.70E-03 | 3.96  | (2.65-5.28)   | 3.33E-09 | 1.61E-08 | same |
| TG(56:8) [NL-20:4]                        | 5.12  | (2.54-7.75)   | 9.23E-05 | 1.00E-03 | 1.88  | (1-2.77)      | 2.85E-05 | 7.72E-05 | same |
| TG(56:8) [NL-20:5]                        | 5.03  | (2.01-8.13)   | 1.03E-03 | 5.94E-03 | 1.59  | (0.43-2.77)   | 7.20E-03 | 1.26E-02 | same |
| TG(56:8) [NL-22:6]                        | 7.57  | (4.02-11.24)  | 2.51E-05 | 4.62E-04 | 3.97  | (2.64-5.31)   | 4.96E-09 | 2.38E-08 | same |
| TG(56:9) [NL-22:6]                        | 6.66  | (3.29-10.14)  | 9.49E-05 | 1.00E-03 | 3.07  | (1.89-4.27)   | 3.82E-07 | 1.35E-06 | same |
| TG(58:10) [NL-22:6]                       | 5.17  | (1.89-8.56)   | 1.90E-03 | 9.52E-03 | 2.08  | (0.92-3.25)   | 4.34E-04 | 9.92E-04 | same |
| TG(58:8) [NL-22:6]                        | 4.73  | (1.39-8.18)   | 5.34E-03 | 2.16E-02 | 2.80  | (1.58-4.04)   | 7.21E-06 | 2.15E-05 | same |
| TG(58:9) [NL-22:6]                        | 4.51  | (1.17-7.97)   | 7.98E-03 | 3.02E-02 | 2.17  | (0.97-3.38)   | 3.75E-04 | 8.69E-04 | same |
| TG(O-50:1) [NL-17:1]                      | 4.99  | (2.47-7.57)   | 1.01E-04 | 1.03E-03 | 4.08  | (3.14-5.03)   | 4.97E-17 | 1.26E-15 | same |
| TG(O-52:2) [NL-17:1]                      | 4.89  | (2.19-7.66)   | 3.63E-04 | 2.52E-03 | 3.82  | (2.87-4.77)   | 4.43E-15 | 6.45E-14 | same |
| TG(O-52:2) [NL-18:1]                      | 5.04  | (2-8.16)      | 1.08E-03 | 6.15E-03 | 2.26  | (1.27-3.27)   | 8.29E-06 | 2.44E-05 | same |
| Cer(m18:0/22:0)                           | 2.43  | (0.5-4.39)    | 1.34E-02 | 4.68E-02 | 2.95  | (2.15-3.76)   | 8.19E-13 | 7.86E-12 | same |
| Cer(m18:0/24:1)                           | 4.35  | (2.12-6.63)   | 1.28E-04 | 1.20E-03 | 2.84  | (2-3.68)      | 3.94E-11 | 2.74E-10 | same |
| GM3(d18:1/24:0)                           | -2.41 | (-3.83--0.96) | 1.23E-03 | 6.55E-03 | -1.92 | (-2.46--1.39) | 6.41E-12 | 5.13E-11 | same |
| HexCer(d18:1/20:0)                        | -2.39 | (-4.02--0.73) | 5.05E-03 | 2.10E-02 | -1.29 | (-1.81--0.76) | 2.18E-06 | 6.88E-06 | same |
| HexCer(d18:1/22:0)                        | -2.35 | (-3.8--0.88)  | 1.85E-03 | 9.34E-03 | -0.92 | (-1.41--0.43) | 2.61E-04 | 6.17E-04 | same |
| HexCer(d18:1/24:0)                        | -1.92 | (-3.37--0.46) | 1.03E-02 | 3.73E-02 | -1.34 | (-1.83--0.85) | 1.19E-07 | 4.57E-07 | same |
| Hex2Cer(d18:1/22:0)                       | -2.48 | (-4.09--0.83) | 3.43E-03 | 1.57E-02 | -1.43 | (-2--0.87)    | 8.84E-07 | 2.91E-06 | same |
| Hex2Cer(d18:1/24:1)                       | -2.62 | (-4.35--0.85) | 3.91E-03 | 1.73E-02 | -1.91 | (-2.5--1.32)  | 5.82E-10 | 3.21E-09 | same |
| Hex3Cer(d18:1/24:0)                       | -2.28 | (-3.7--0.83)  | 2.21E-03 | 1.09E-02 | -1.90 | (-2.42--1.37) | 6.58E-12 | 5.18E-11 | same |
| SM(d18:1/14:0)/SM(d16:1/16:0)             | 2.11  | (0.57-3.68)   | 7.37E-03 | 2.85E-02 | 0.72  | (0.27-1.18)   | 1.93E-03 | 3.86E-03 | same |
| SM(d18:2/14:0)                            | 6.29  | (4.83-7.77)   | 2.07E-16 | 9.93E-14 | 1.49  | (1.01-1.98)   | 2.12E-09 | 1.07E-08 | same |
| SM(34:3)                                  | 2.92  | (1.38-4.49)   | 2.12E-04 | 1.70E-03 | 0.97  | (0.49-1.46)   | 8.92E-05 | 2.27E-04 | same |
| SM(38:3) (a)                              | 1.93  | (0.68-3.2)    | 2.56E-03 | 1.24E-02 | 0.56  | (0.14-0.98)   | 8.55E-03 | 1.47E-02 | same |
| SM(d16:1/24:1)                            | 2.62  | (1.12-4.15)   | 6.11E-04 | 3.91E-03 | 0.55  | (0.05-1.05)   | 3.15E-02 | 4.75E-02 | same |
| LPC(14:0) [sn2]                           | 4.86  | (2.45-7.33)   | 7.65E-05 | 8.95E-04 | 1.18  | (0.41-1.96)   | 2.81E-03 | 5.40E-03 | same |
| LPC(14:0) [sn1]                           | 4.70  | (2.35-7.09)   | 8.28E-05 | 9.46E-04 | 1.53  | (0.78-2.3)    | 7.13E-05 | 1.84E-04 | same |
| LPC(16:1) [sn2]                           | 5.09  | (3.19-7.03)   | 1.66E-07 | 1.14E-05 | 0.95  | (0.37-1.53)   | 1.29E-03 | 2.69E-03 | same |
| LPC(16:1) [sn1]                           | 3.93  | (2.1-5.79)    | 2.67E-05 | 4.62E-04 | 0.87  | (0.34-1.4)    | 1.33E-03 | 2.76E-03 | same |
| LPC(19:0) [sn1] (a) / LPC(19:0) [sn2] (b) | -2.26 | (-3.96--0.53) | 1.08E-02 | 3.85E-02 | -2.28 | (-2.79--1.76) | 6.69E-17 | 1.61E-15 | same |
| LPC(20:0) [sn1]                           | -3.35 | (-4.85--1.82) | 2.48E-05 | 4.62E-04 | -2.10 | (-2.58--1.62) | 1.05E-16 | 2.41E-15 | same |
| LPC(20:1) [sn1]                           | -2.32 | (-3.93--0.7)  | 5.46E-03 | 2.19E-02 | -1.86 | (-2.38--1.33) | 1.33E-11 | 9.82E-11 | same |
| LPC(20:3) [sn2]                           | 2.63  | (0.79-4.5)    | 4.98E-03 | 2.10E-02 | 1.19  | (0.56-1.83)   | 2.39E-04 | 5.67E-04 | same |
| LPC(20:3) [104_sn1]                       | 2.53  | (0.51-4.6)    | 1.42E-02 | 4.91E-02 | 0.93  | (0.28-1.58)   | 4.92E-03 | 8.95E-03 | same |
| LPC(O-20:0)                               | -2.32 | (-4.14--0.47) | 1.46E-02 | 4.96E-02 | -2.23 | (-2.77--1.69) | 4.19E-15 | 6.29E-14 | same |
| LPC(O-22:0)                               | -1.92 | (-3.1--0.72)  | 1.79E-03 | 9.15E-03 | -1.43 | (-1.85--1)    | 1.03E-10 | 6.79E-10 | same |
| PC(32:1)                                  | 3.56  | (1.41-5.75)   | 1.12E-03 | 6.20E-03 | 2.58  | (1.77-3.39)   | 4.13E-10 | 2.39E-09 | same |
| PC(14:0_20:4)                             | 4.75  | (2.3-7.26)    | 1.38E-04 | 1.25E-03 | 1.14  | (0.28-2.01)   | 9.67E-03 | 1.64E-02 | same |
| PC(34:5)                                  | 7.01  | (3.69-10.43)  | 3.00E-05 | 4.64E-04 | 1.64  | (0.4-2.9)     | 9.61E-03 | 1.64E-02 | same |
| PC(17:0_18:2)                             | -2.03 | (-3.62--0.41) | 1.44E-02 | 4.92E-02 | -1.17 | (-1.68--0.65) | 1.30E-05 | 3.74E-05 | same |
| PC(16:0_20:3) (a)                         | -2.86 | (-4.42--1.29) | 4.47E-04 | 3.02E-03 | -1.61 | (-2.18--1.04) | 5.63E-08 | 2.33E-07 | same |
| PC(18:2_18:2)                             | -3.04 | (-5.24--0.78) | 8.73E-03 | 3.24E-02 | -2.49 | (-3.22--1.75) | 1.24E-10 | 7.80E-10 | same |
| PC(18:0_20:3)                             | 5.35  | (3.52-7.21)   | 1.22E-08 | 1.46E-06 | 3.69  | (2.93-4.46)   | 1.54E-20 | 1.06E-18 | same |

|                   |       |               |                 |                 |       |               |                 |                 |      |
|-------------------|-------|---------------|-----------------|-----------------|-------|---------------|-----------------|-----------------|------|
| PC(18:0_22:6)     | 3.01  | (0.9-5.18)    | <b>5.22E-03</b> | <b>2.12E-02</b> | 1.19  | (0.44-1.95)   | <b>1.98E-03</b> | <b>3.94E-03</b> | same |
| PC(O-34:1)        | -2.24 | (-3.3--1.18)  | <b>4.84E-05</b> | <b>7.04E-04</b> | -1.21 | (-1.62--0.79) | <b>2.44E-08</b> | <b>1.08E-07</b> | same |
| PC(O-36:0)        | -2.41 | (-3.76--1.03) | <b>6.74E-04</b> | <b>4.23E-03</b> | -0.84 | (-1.33--0.35) | <b>9.07E-04</b> | <b>1.95E-03</b> | same |
| PC(O-18:0/18:1)   | -3.04 | (-4.22--1.85) | <b>1.05E-06</b> | <b>3.88E-05</b> | -1.48 | (-1.92--1.04) | <b>1.07E-10</b> | <b>6.87E-10</b> | same |
| PC(O-18:1/18:1)   | -1.86 | (-2.95--0.75) | <b>1.12E-03</b> | <b>6.20E-03</b> | -1.71 | (-2.13--1.29) | <b>1.10E-14</b> | <b>1.42E-13</b> | same |
| PC(O-18:0/18:2)   | -2.63 | (-4.12--1.12) | <b>7.48E-04</b> | <b>4.54E-03</b> | -1.89 | (-2.38--1.39) | <b>4.43E-13</b> | <b>4.43E-12</b> | same |
| PC(P-16:0/18:0)   | -2.11 | (-3.09--1.13) | <b>3.73E-05</b> | <b>5.60E-04</b> | -1.47 | (-1.84--1.09) | <b>1.05E-13</b> | <b>1.20E-12</b> | same |
| PC(P-16:0/18:1)   | -1.99 | (-3.17--0.79) | <b>1.27E-03</b> | <b>6.69E-03</b> | -2.19 | (-2.7--1.69)  | <b>2.94E-16</b> | <b>6.14E-15</b> | same |
| PC(P-35:2) (b)    | -2.72 | (-4.69--0.7)  | <b>8.59E-03</b> | <b>3.22E-02</b> | -2.14 | (-2.83--1.45) | <b>2.27E-09</b> | <b>1.13E-08</b> | same |
| PC(P-18:0/18:2)   | -2.97 | (-4.48--1.45) | <b>1.69E-04</b> | <b>1.48E-03</b> | -2.58 | (-3.1--2.06)  | <b>1.54E-20</b> | <b>1.06E-18</b> | same |
| PE(16:0_16:1)     | 4.35  | (0.88-7.95)   | <b>1.38E-02</b> | <b>4.78E-02</b> | 3.03  | (1.74-4.33)   | <b>3.84E-06</b> | <b>1.18E-05</b> | same |
| PE(18:0_20:3) (a) | 3.60  | (1.22-6.04)   | <b>3.02E-03</b> | <b>1.41E-02</b> | 2.90  | (1.96-3.84)   | <b>1.44E-09</b> | <b>7.41E-09</b> | same |
| PE(18:0_22:6)     | 3.81  | (1.08-6.61)   | <b>6.06E-03</b> | <b>2.36E-02</b> | 1.67  | (0.73-2.63)   | <b>5.37E-04</b> | <b>1.20E-03</b> | same |
| PE(P-16:0/20:3)   | 4.14  | (2.26-6.06)   | <b>1.60E-05</b> | <b>3.36E-04</b> | 1.10  | (0.38-1.82)   | <b>2.78E-03</b> | <b>5.35E-03</b> | same |
| PE(P-20:0/18:2)   | -2.72 | (-4.31--1.11) | <b>1.09E-03</b> | <b>6.15E-03</b> | -1.98 | (-2.5--1.45)  | <b>1.04E-12</b> | <b>9.79E-12</b> | same |
| PI(16:0_16:1)     | 8.42  | (5.56-11.34)  | <b>6.42E-09</b> | <b>1.03E-06</b> | 3.85  | (2.77-4.94)   | <b>3.76E-12</b> | <b>3.11E-11</b> | same |
| PI(18:1_18:2)     | -3.22 | (-4.99--1.41) | <b>5.62E-04</b> | <b>3.65E-03</b> | -1.29 | (-1.97--0.61) | <b>2.16E-04</b> | <b>5.17E-04</b> | same |

**Table S3E.** The overlapping lipid species in the four lipid-adiposity association studies. Related to Figure 3.

| Lipid Species       | ppBMI (antenatal)                           |               |                 |                 | Adult BMI (postnatal)                       |               |                 |                 | Birth Weight (cord blood)                    |               |                 |                 | Child BMI (6-year-old)                      |               |                 |                 | Trend     |
|---------------------|---------------------------------------------|---------------|-----------------|-----------------|---------------------------------------------|---------------|-----------------|-----------------|----------------------------------------------|---------------|-----------------|-----------------|---------------------------------------------|---------------|-----------------|-----------------|-----------|
|                     | %change in lipid concentration per unit BMI | 95%CI         | p-value         | p-value(BH)     | %change in lipid concentration per unit BMI | 95%CI         | p-value         | p-value(BH)     | %change in lipid concentration per 100 grams | 95%CI         | p-value         | p-value(BH)     | %change in lipid concentration per unit BMI | 95%CI         | p-value         | p-value(BH)     |           |
| CE(16:1)            | -1.06                                       | (-1.82--0.29) | <b>7.23E-03</b> | <b>1.46E-02</b> | 2.17                                        | (1.53-2.82)   | <b>6.89E-11</b> | <b>4.60E-10</b> | 0.98                                         | (0.31-1.69)   | <b>3.55E-03</b> | <b>8.00E-03</b> | 5.77                                        | (4.04-7.53)   | <b>9.25E-11</b> | <b>2.22E-08</b> | different |
| DG(16:0_18:1)       | 1.33                                        | (0.59-2.07)   | <b>4.36E-04</b> | <b>1.22E-03</b> | 4.26                                        | (3.33-5.21)   | <b>1.32E-18</b> | <b>4.86E-17</b> | -1.91                                        | (-2.57--1.19) | <b>1.35E-06</b> | <b>4.62E-06</b> | 3.90                                        | (1.38-6.49)   | <b>2.40E-03</b> | <b>1.18E-02</b> | different |
| DG(16:0_18:2)       | 0.92                                        | (0.21-1.65)   | <b>1.15E-02</b> | <b>2.16E-02</b> | 3.62                                        | (2.72-4.52)   | <b>5.53E-15</b> | <b>7.59E-14</b> | -3.07                                        | (-3.76--2.31) | <b>1.09E-11</b> | <b>6.22E-11</b> | 4.00                                        | (1.57-6.48)   | <b>1.20E-03</b> | <b>6.49E-03</b> | different |
| DG(18:0_18:1)       | 1.36                                        | (0.69-2.04)   | <b>7.91E-05</b> | <b>2.60E-04</b> | 4.41                                        | (3.51-5.31)   | <b>4.70E-21</b> | <b>4.51E-19</b> | -1.29                                        | (-1.99--0.53) | <b>1.23E-03</b> | <b>2.94E-03</b> | 4.06                                        | (1.71-6.46)   | <b>6.87E-04</b> | <b>4.23E-03</b> | different |
| DG(18:0_18:2)       | 0.99                                        | (0.23-1.76)   | <b>1.04E-02</b> | <b>1.97E-02</b> | 4.40                                        | (3.41-5.39)   | <b>7.51E-18</b> | <b>2.57E-16</b> | -1.62                                        | (-2.52--0.61) | <b>2.43E-03</b> | <b>5.62E-03</b> | 3.76                                        | (1.3-6.29)    | <b>2.68E-03</b> | <b>1.27E-02</b> | different |
| DG(16:0_20:4)       | 1.19                                        | (0.26-2.12)   | <b>1.22E-02</b> | <b>2.27E-02</b> | 4.27                                        | (3.25-5.3)    | <b>4.79E-16</b> | <b>9.59E-15</b> | -2.06                                        | (-2.83--1.21) | <b>9.20E-06</b> | <b>2.95E-05</b> | 4.97                                        | (2.34-7.66)   | <b>1.98E-04</b> | <b>1.61E-03</b> | different |
| DG(18:1_20:4)       | 1.14                                        | (0.4-1.88)    | <b>2.42E-03</b> | <b>5.53E-03</b> | 2.47                                        | (1.71-3.22)   | <b>1.81E-10</b> | <b>1.10E-09</b> | -2.06                                        | (-2.71--1.36) | <b>1.08E-07</b> | <b>4.14E-07</b> | 3.90                                        | (1.68-6.16)   | <b>5.47E-04</b> | <b>3.60E-03</b> | different |
| DG(18:1_22:6)       | 1.53                                        | (0.47-2.61)   | <b>4.63E-03</b> | <b>9.97E-03</b> | 3.18                                        | (2.04-4.34)   | <b>5.26E-08</b> | <b>2.22E-07</b> | -3.49                                        | (-4.15--2.76) | <b>7.44E-15</b> | <b>6.49E-14</b> | 4.14                                        | (1.32-7.04)   | <b>3.88E-03</b> | <b>1.73E-02</b> | different |
| DG(18:2_22:6)       | 1.52                                        | (0.42-2.63)   | <b>6.55E-03</b> | <b>1.35E-02</b> | 3.05                                        | (1.87-4.24)   | <b>3.60E-07</b> | <b>1.28E-06</b> | -4.00                                        | (-4.74--3.16) | <b>9.00E-14</b> | <b>6.75E-13</b> | 4.79                                        | (1.45-8.24)   | <b>4.80E-03</b> | <b>2.04E-02</b> | different |
| TG(48:0) [NL-18:0]  | -1.56                                       | (-2.43--0.68) | <b>5.76E-04</b> | <b>1.53E-03</b> | 4.34                                        | (2.99-5.71)   | <b>3.54E-10</b> | <b>2.07E-09</b> | -1.44                                        | (-2.28--0.51) | <b>3.14E-03</b> | <b>7.14E-03</b> | 7.45                                        | (3.74-11.29)  | <b>7.09E-05</b> | <b>8.54E-04</b> | different |
| TG(48:2) [NL-14:1]  | -1.20                                       | (-2.25--0.13) | <b>2.78E-02</b> | <b>4.70E-02</b> | 4.79                                        | (3.42-6.18)   | <b>7.51E-12</b> | <b>5.72E-11</b> | -3.06                                        | (-3.81--2.23) | <b>4.50E-10</b> | <b>2.23E-09</b> | 8.90                                        | (4.81-13.16)  | <b>1.61E-05</b> | <b>3.36E-04</b> | different |
| TG(48:2) [NL-18:2]  | -1.16                                       | (-2.2--0.12)  | <b>2.91E-02</b> | <b>4.87E-02</b> | 5.21                                        | (3.68-6.77)   | <b>2.87E-11</b> | <b>2.03E-10</b> | -4.14                                        | (-4.86--3.32) | <b>5.42E-15</b> | <b>4.91E-14</b> | 8.58                                        | (4.3-13.04)   | <b>7.11E-05</b> | <b>8.54E-04</b> | different |
| TG(48:3) [NL-14:0]  | -1.51                                       | (-2.64--0.37) | <b>9.55E-03</b> | <b>1.85E-02</b> | 4.32                                        | (2.9-5.76)    | <b>2.31E-09</b> | <b>1.14E-08</b> | -4.04                                        | (-4.73--3.26) | <b>1.02E-15</b> | <b>1.04E-14</b> | 9.53                                        | (5.17-14.08)  | <b>1.43E-05</b> | <b>3.28E-04</b> | different |
| TG(48:3) [NL-18:3]  | -1.81                                       | (-3.07--0.53) | <b>5.76E-03</b> | <b>1.21E-02</b> | 4.99                                        | (3.41-6.59)   | <b>5.23E-10</b> | <b>2.92E-09</b> | -3.23                                        | (-3.91--2.48) | <b>8.75E-13</b> | <b>5.83E-12</b> | 8.18                                        | (3.69-12.86)  | <b>3.09E-04</b> | <b>2.27E-03</b> | different |
| TG(50:1) [NL-16:0]  | 0.83                                        | (0.22-1.43)   | <b>7.27E-03</b> | <b>1.46E-02</b> | 4.34                                        | (3.39-5.3)    | <b>1.03E-18</b> | <b>4.12E-17</b> | -2.49                                        | (-3.25--1.64) | <b>2.17E-07</b> | <b>8.15E-07</b> | 4.63                                        | (2.1-7.22)    | <b>3.13E-04</b> | <b>2.27E-03</b> | different |
| TG(50:1) [NL-18:1]  | 0.76                                        | (0.18-1.34)   | <b>1.03E-02</b> | <b>1.97E-02</b> | 4.10                                        | (3.16-5.05)   | <b>4.06E-17</b> | <b>1.08E-15</b> | -2.47                                        | (-3.24--1.62) | <b>2.61E-07</b> | <b>9.63E-07</b> | 4.17                                        | (1.73-6.68)   | <b>7.99E-04</b> | <b>4.74E-03</b> | different |
| TG(50:2) [NL-14:0]  | -0.65                                       | (-1.21--0.07) | <b>2.69E-02</b> | <b>4.57E-02</b> | 2.80                                        | (1.76-3.86)   | <b>1.50E-07</b> | <b>5.54E-07</b> | -3.34                                        | (-4.1--2.48)  | <b>1.16E-10</b> | <b>6.01E-10</b> | 4.36                                        | (1.14-7.69)   | <b>7.83E-03</b> | <b>3.01E-02</b> | different |
| TG(50:2) [NL-18:2]  | 0.66                                        | (0.08-1.24)   | <b>2.58E-02</b> | <b>4.41E-02</b> | 3.72                                        | (2.82-4.62)   | <b>8.45E-16</b> | <b>1.53E-14</b> | -4.17                                        | (-4.92--3.31) | <b>5.26E-14</b> | <b>4.14E-13</b> | 4.53                                        | (2.11-7)      | <b>2.30E-04</b> | <b>1.78E-03</b> | different |
| TG(52:1) [NL-18:0]  | 1.38                                        | (0.59-2.18)   | <b>6.58E-04</b> | <b>1.73E-03</b> | 5.69                                        | (4.53-6.86)   | <b>2.15E-21</b> | <b>2.58E-19</b> | -1.86                                        | (-2.76--0.83) | <b>6.81E-04</b> | <b>1.69E-03</b> | 5.79                                        | (2.8-8.86)    | <b>1.32E-04</b> | <b>1.22E-03</b> | different |
| TG(52:1) [NL-18:1]  | 1.45                                        | (0.69-2.23)   | <b>2.04E-04</b> | <b>6.17E-04</b> | 5.86                                        | (4.73-7)      | <b>1.79E-23</b> | <b>8.60E-21</b> | -1.80                                        | (-2.71--0.77) | <b>9.96E-04</b> | <b>2.41E-03</b> | 5.71                                        | (2.83-8.68)   | <b>9.59E-05</b> | <b>1.00E-03</b> | different |
| TG(54:1) [NL-18:1]  | 0.99                                        | (0.32-1.66)   | <b>3.57E-03</b> | <b>8.00E-03</b> | 4.45                                        | (3.57-5.34)   | <b>4.54E-22</b> | <b>7.26E-20</b> | -1.64                                        | (-2.56--0.59) | <b>2.89E-03</b> | <b>6.61E-03</b> | 3.54                                        | (1.13-6.02)   | <b>3.96E-03</b> | <b>1.73E-02</b> | different |
| TG(54:2) [NL-18:0]  | 1.41                                        | (0.72-2.1)    | <b>6.55E-05</b> | <b>2.23E-04</b> | 4.24                                        | (3.35-5.13)   | <b>2.72E-20</b> | <b>1.63E-18</b> | -1.85                                        | (-2.69--0.91) | <b>2.40E-04</b> | <b>6.39E-04</b> | 3.30                                        | (0.94-5.71)   | <b>6.02E-03</b> | <b>2.36E-02</b> | different |
| TG(54:3) [NL-18:2]  | 0.72                                        | (0.14-1.3)    | <b>1.43E-02</b> | <b>2.59E-02</b> | 2.23                                        | (1.57-2.89)   | <b>5.13E-11</b> | <b>3.51E-10</b> | -3.06                                        | (-3.75--2.3)  | <b>1.28E-11</b> | <b>7.23E-11</b> | 2.32                                        | (0.48-4.19)   | <b>1.32E-02</b> | <b>4.65E-02</b> | different |
| TG(54:5) [NL-20:4]  | 1.04                                        | (0.38-1.71)   | <b>1.91E-03</b> | <b>4.51E-03</b> | 3.37                                        | (2.55-4.2)    | <b>2.12E-15</b> | <b>3.39E-14</b> | -3.73                                        | (-4.49--2.86) | <b>4.40E-12</b> | <b>2.64E-11</b> | 5.84                                        | (3.43-8.3)    | <b>1.90E-06</b> | <b>6.49E-05</b> | different |
| TG(54:6) [NL-20:4]  | 1.16                                        | (0.33-2)      | <b>6.24E-03</b> | <b>1.29E-02</b> | 3.69                                        | (2.71-4.68)   | <b>2.17E-13</b> | <b>2.27E-12</b> | -4.11                                        | (-4.83--3.28) | <b>1.19E-14</b> | <b>9.81E-14</b> | 7.52                                        | (4.68-10.44)  | <b>1.91E-07</b> | <b>1.15E-05</b> | different |
| TG(54:6) [NL-22:6]  | 1.79                                        | (0.57-3.02)   | <b>4.10E-03</b> | <b>9.06E-03</b> | 5.76                                        | (4.33-7.22)   | <b>4.96E-15</b> | <b>7.00E-14</b> | -5.16                                        | (-5.83--4.38) | <b>1.98E-20</b> | <b>5.23E-19</b> | 8.20                                        | (4.48-12.06)  | <b>1.29E-05</b> | <b>3.10E-04</b> | different |
| TG(56:6) [NL-20:4]  | 1.34                                        | (0.81-1.87)   | <b>7.12E-07</b> | <b>3.60E-06</b> | 1.36                                        | (0.85-1.88)   | <b>2.38E-07</b> | <b>8.65E-07</b> | -3.00                                        | (-3.77--2.15) | <b>1.89E-09</b> | <b>8.92E-09</b> | 3.72                                        | (1.91-5.57)   | <b>5.78E-05</b> | <b>7.86E-04</b> | different |
| TG(56:7) [NL-20:4]  | 1.02                                        | (0.35-1.7)    | <b>2.84E-03</b> | <b>6.40E-03</b> | 1.88                                        | (1.14-2.62)   | <b>6.63E-07</b> | <b>2.29E-06</b> | -3.66                                        | (-4.41--2.81) | <b>3.38E-12</b> | <b>2.08E-11</b> | 4.16                                        | (1.73-6.64)   | <b>7.60E-04</b> | <b>4.56E-03</b> | different |
| TG(56:7) [NL-22:6]  | 1.93                                        | (0.84-3.04)   | <b>4.97E-04</b> | <b>1.35E-03</b> | 3.96                                        | (2.65-5.28)   | <b>3.33E-09</b> | <b>1.61E-08</b> | -5.07                                        | (-5.72--4.33) | <b>1.85E-21</b> | <b>7.12E-20</b> | 6.45                                        | (3.01-10)     | <b>2.16E-04</b> | <b>1.70E-03</b> | different |
| TG(56:8) [NL-22:6]  | 1.76                                        | (0.54-2.99)   | <b>4.49E-03</b> | <b>9.76E-03</b> | 3.97                                        | (2.64-5.31)   | <b>4.96E-09</b> | <b>2.38E-08</b> | -5.36                                        | (-5.97--4.65) | <b>1.69E-24</b> | <b>1.02E-22</b> | 7.57                                        | (4.02-11.24)  | <b>2.51E-05</b> | <b>4.62E-04</b> | different |
| TG(58:8) [NL-22:6]  | 1.46                                        | (0.38-2.56)   | <b>7.98E-03</b> | <b>1.58E-02</b> | 2.80                                        | (1.58-4.04)   | <b>7.21E-06</b> | <b>2.15E-05</b> | -4.50                                        | (-5.16--3.76) | <b>3.67E-19</b> | <b>7.05E-18</b> | 4.73                                        | (1.39-8.18)   | <b>5.34E-03</b> | <b>2.16E-02</b> | different |
| Cer(m18:0/24:1)     | 1.15                                        | (0.26-2.04)   | <b>1.11E-02</b> | <b>2.08E-02</b> | 2.84                                        | (2-3.68)      | <b>3.94E-11</b> | <b>2.74E-10</b> | -1.46                                        | (-2.42--0.37) | <b>9.81E-03</b> | <b>2.02E-02</b> | 4.35                                        | (2.12-6.63)   | <b>1.28E-04</b> | <b>1.20E-03</b> | different |
| LPC(20:1) [sn1]     | -0.62                                       | (-1.08--0.15) | <b>9.49E-03</b> | <b>1.84E-02</b> | -1.86                                       | (-2.38--1.33) | <b>1.33E-11</b> | <b>9.82E-11</b> | 1.75                                         | (1.27-2.25)   | <b>1.55E-13</b> | <b>1.12E-12</b> | -2.32                                       | (-3.93--0.7)  | <b>5.46E-03</b> | <b>2.19E-02</b> | different |
| LPC(20:3) [sn2]     | 1.05                                        | (0.4-1.7)     | <b>1.48E-03</b> | <b>3.59E-03</b> | 1.19                                        | (0.56-1.83)   | <b>2.39E-04</b> | <b>5.67E-04</b> | 2.58                                         | (1.91-3.3)    | <b>1.79E-15</b> | <b>1.72E-14</b> | 2.63                                        | (0.79-4.5)    | <b>4.98E-03</b> | <b>2.10E-02</b> | same      |
| LPC(20:3) [104_sn1] | 1.42                                        | (0.72-2.12)   | <b>7.46E-05</b> | <b>2.47E-04</b> | 0.93                                        | (0.28-1.58)   | <b>4.92E-03</b> | <b>8.95E-03</b> | 3.22                                         | (2.49-3.99)   | <b>9.49E-21</b> | <b>2.85E-19</b> | 2.53                                        | (0.51-4.6)    | <b>1.42E-02</b> | <b>4.91E-02</b> | same      |
| PC(17:0_18:2)       | -1.54                                       | (-2.08--1)    | <b>3.86E-08</b> | <b>2.57E-07</b> | -1.17                                       | (-1.68--0.65) | <b>1.30E-05</b> | <b>3.74E-05</b> | -1.28                                        | (-1.84--0.68) | <b>5.78E-05</b> | <b>1.69E-04</b> | -2.03                                       | (-3.62--0.41) | <b>1.44E-02</b> | <b>4.92E-02</b> | same      |
| PC(O-18:0/18:1)     | -1.51                                       | (-1.98--1.03) | <b>1.00E-09</b> | <b>1.02E-08</b> | -1.48                                       | (-1.92--1.04) | <b>1.07E-10</b> | <b>6.87E-10</b> | 1.31                                         | (0.62-2.05)   | <b>1.35E-04</b> | <b>3.71E-04</b> | -3.04                                       | (-4.22--1.85) | <b>1.05E-06</b> | <b>3.88E-05</b> | different |
| PC(O-18:1/18:1)     | -1.20                                       | (-1.66--0.74) | <b>4.16E-07</b> | <b>2.24E-06</b> | -1.71                                       | (-2.13--1.29) | <b>1.10E-14</b> | <b>1.42E-13</b> | 0.71                                         | (0.11-1.35)   | <b>2.01E-02</b> | <b>3.86E-02</b> | -1.86                                       | (-2.95--0.75) | <b>1.12E-03</b> | <b>6.20E-03</b> | different |
| PC(P-35:2) (b)      | -1.83                                       | (-2.55--1.1)  | <b>1.07E-06</b> | <b>5.20E-06</b> | -2.14                                       | (-2.83--1.45) | <b>2.27E-09</b> | <b>1.13E-08</b> | -1.45                                        | (-2.06--0.79) | <b>3.89E-05</b> | <b>1.15E-04</b> | -2.72                                       | (-4.69--0.7)  | <b>8.59E-03</b> | <b>3.22E-02</b> | same      |
| PE(18:0_22:6)       | 1.34                                        | (0.55-2.14)   | <b>8.34E-04</b> | <b>2.13E-03</b> | 1.67                                        | (0.73-2.63)   | <b>5.37E-04</b> | <b>1.20E-03</b> | -1.61                                        | (-2.34--0.8)  | <b>2.02E-04</b> | <b>5.43E-04</b> | 3.81                                        | (1.08-6.61)   | <b>6.06E-03</b> | <b>2.36E-02</b> | different |
| PI(18:1_18:2)       | -2.66                                       | (-3.29--2.03) | <b>1.11E-15</b> | <b>5.91E-14</b> | -1.29                                       | (-1.97--0.61) | <b>2.16E-04</b> | <b>5.17E-04</b> | -1.47                                        | (-1.98--0.93) | <b>4.93E-07</b> | <b>1.78E-06</b> | -3.22                                       | (-4.99--1.41) | <b>5.62E-04</b> | <b>3.65E-03</b> | same      |

**Table S4A.** Sex difference in association studies with birth weight and child BMI in terms of class levels.

| Lipid Class | Birth Weight (cord blood) - Male<br>adjusted for ethnicity, maternal age, maternal education level, pre-pregnancy BMI, total gestational weight gain, gestational age and parity |               |                 |                 | Birth Weight (cord blood) -Female<br>adjusted for ethnicity, maternal age, maternal education level, pre-pregnancy BMI, total gestational weight gain, gestational age and parity |               |                 |                 | Child BMI (6-year-old) - Male<br>adjusted for ethnicity and maternal education level |              |                 |             | Child BMI (6-year-old) -Female<br>adjusted for ethnicity and maternal education level |               |                 |             |
|-------------|----------------------------------------------------------------------------------------------------------------------------------------------------------------------------------|---------------|-----------------|-----------------|-----------------------------------------------------------------------------------------------------------------------------------------------------------------------------------|---------------|-----------------|-----------------|--------------------------------------------------------------------------------------|--------------|-----------------|-------------|---------------------------------------------------------------------------------------|---------------|-----------------|-------------|
|             | %change in lipid concentration per 100 grams                                                                                                                                     | 95%CI         | p-value         | p-value(BH)     | %change in lipid concentration per 100 grams                                                                                                                                      | 95%CI         | p-value         | p-value(BH)     | %change in lipid concentration per unit BMI                                          | 95%CI        | p-value         | p-value(BH) | %change in lipid concentration per unit BMI                                           | 95%CI         | p-value         | p-value(BH) |
| AC          | -0.87                                                                                                                                                                            | (-1.54--0.15) | <b>1.90E-02</b> | <b>3.96E-02</b> | -0.06                                                                                                                                                                             | (-0.91- 0.87) | 8.95E-01        | 9.66E-01        | -0.13                                                                                | (-2.08-1.86) | 8.98E-01        | 9.35E-01    | -1.79                                                                                 | (-4.19- 0.68) | 1.53E-01        | 4.77E-01    |
| CE          | -0.44                                                                                                                                                                            | (-0.99- 0.14) | 1.36E-01        | 2.12E-01        | -0.06                                                                                                                                                                             | (-0.79- 0.74) | 8.84E-01        | 9.66E-01        | 0.36                                                                                 | (-0.87-1.61) | 5.63E-01        | 7.19E-01    | 0.71                                                                                  | (-0.70- 2.13) | 3.22E-01        | 5.75E-01    |
| DG          | -2.70                                                                                                                                                                            | (-3.37--1.97) | <b>3.67E-10</b> | <b>2.29E-09</b> | -1.42                                                                                                                                                                             | (-2.40--0.32) | <b>1.34E-02</b> | <b>4.17E-02</b> | 1.75                                                                                 | (-1.03-4.60) | 2.18E-01        | 6.07E-01    | 4.47                                                                                  | ( 1.03- 8.02) | <b>1.08E-02</b> | 9.02E-02    |
| TG          | -3.85                                                                                                                                                                            | (-4.60--3.01) | <b>9.57E-13</b> | <b>1.20E-11</b> | -2.25                                                                                                                                                                             | (-3.47--0.80) | <b>3.73E-03</b> | <b>1.33E-02</b> | 3.11                                                                                 | ( 0.51-5.78) | <b>1.89E-02</b> | 4.73E-01    | 4.46                                                                                  | ( 1.23- 7.80) | <b>6.78E-03</b> | 8.48E-02    |
| TG(O)       | -3.00                                                                                                                                                                            | (-3.77--2.14) | <b>4.15E-09</b> | <b>2.08E-08</b> | -2.25                                                                                                                                                                             | (-3.29--1.04) | <b>6.13E-04</b> | <b>2.55E-03</b> | 2.70                                                                                 | (-0.12-5.59) | 6.05E-02        | 6.07E-01    | 3.59                                                                                  | (-0.10- 7.40) | 5.63E-02        | 2.81E-01    |
| dhCer       | -0.17                                                                                                                                                                            | (-1.00- 0.74) | 7.03E-01        | 8.36E-01        | -0.41                                                                                                                                                                             | (-1.38- 0.67) | 4.37E-01        | 8.87E-01        | 0.94                                                                                 | (-1.19-3.12) | 3.88E-01        | 6.47E-01    | 0.67                                                                                  | (-1.69- 3.08) | 5.80E-01        | 7.94E-01    |
| Cer         | -0.63                                                                                                                                                                            | (-1.30- 0.08) | 8.20E-02        | 1.46E-01        | -0.01                                                                                                                                                                             | (-0.90- 0.97) | 9.81E-01        | 9.81E-01        | 0.60                                                                                 | (-1.14-2.36) | 5.02E-01        | 6.97E-01    | 0.48                                                                                  | (-1.32- 2.33) | 6.00E-01        | 7.94E-01    |
| DeoxyCer    | -2.13                                                                                                                                                                            | (-2.82--1.37) | <b>5.38E-07</b> | <b>2.24E-06</b> | -1.97                                                                                                                                                                             | (-2.84--0.99) | <b>2.03E-04</b> | <b>1.02E-03</b> | 1.15                                                                                 | (-0.99-3.33) | 2.95E-01        | 6.20E-01    | 2.73                                                                                  | (-0.07- 5.61) | 5.59E-02        | 2.81E-01    |
| GM3         | -0.41                                                                                                                                                                            | (-1.25- 0.50) | 3.60E-01        | 4.91E-01        | -0.17                                                                                                                                                                             | (-1.25- 1.05) | 7.78E-01        | 9.66E-01        | -1.01                                                                                | (-2.59-0.59) | 2.14E-01        | 6.07E-01    | -1.94                                                                                 | (-4.02- 0.18) | 7.18E-02        | 2.96E-01    |
| HexCer      | 0.33                                                                                                                                                                             | (-0.63- 1.39) | 5.16E-01        | 6.44E-01        | 0.06                                                                                                                                                                              | (-1.03- 1.29) | 9.15E-01        | 9.66E-01        | -0.89                                                                                | (-2.66-0.91) | 3.29E-01        | 6.28E-01    | -2.84                                                                                 | (-4.69--0.95) | <b>3.67E-03</b> | 8.48E-02    |
| Hex2Cer     | -0.41                                                                                                                                                                            | (-1.26- 0.52) | 3.74E-01        | 4.91E-01        | -0.41                                                                                                                                                                             | (-1.46- 0.77) | 4.82E-01        | 8.87E-01        | -1.03                                                                                | (-3.16-1.16) | 3.52E-01        | 6.28E-01    | -1.47                                                                                 | (-4.02- 1.15) | 2.68E-01        | 5.15E-01    |
| Hex3Cer     | -0.39                                                                                                                                                                            | (-1.12- 0.40) | 3.27E-01        | 4.81E-01        | -0.35                                                                                                                                                                             | (-1.29- 0.70) | 4.99E-01        | 8.87E-01        | -1.00                                                                                | (-2.45-0.47) | 1.78E-01        | 6.07E-01    | -1.19                                                                                 | (-2.97- 0.63) | 1.98E-01        | 4.78E-01    |
| SM          | -0.09                                                                                                                                                                            | (-0.77- 0.64) | 8.03E-01        | 8.36E-01        | -0.05                                                                                                                                                                             | (-0.90- 0.88) | 9.10E-01        | 9.66E-01        | -0.57                                                                                | (-2.14-1.03) | 4.81E-01        | 6.97E-01    | -0.38                                                                                 | (-2.32- 1.59) | 6.99E-01        | 7.94E-01    |
| LPC         | 2.24                                                                                                                                                                             | ( 1.55- 2.97) | <b>2.84E-11</b> | <b>2.37E-10</b> | 2.30                                                                                                                                                                              | ( 1.49- 3.17) | <b>5.89E-09</b> | <b>7.37E-08</b> | -0.86                                                                                | (-3.09-1.41) | 4.52E-01        | 6.97E-01    | 1.77                                                                                  | (-0.96- 4.58) | 2.05E-01        | 4.78E-01    |
| LPC(O)      | 1.34                                                                                                                                                                             | ( 0.75- 1.96) | <b>5.46E-06</b> | <b>1.71E-05</b> | 1.33                                                                                                                                                                              | ( 0.66- 2.05) | <b>7.05E-05</b> | <b>4.41E-04</b> | -1.44                                                                                | (-3.53-0.70) | 1.84E-01        | 6.07E-01    | 1.07                                                                                  | (-1.41- 3.61) | 3.99E-01        | 6.66E-01    |
| LPC(P)      | 1.51                                                                                                                                                                             | ( 0.88- 2.17) | <b>1.27E-06</b> | <b>4.54E-06</b> | 1.44                                                                                                                                                                              | ( 0.73- 2.19) | <b>4.20E-05</b> | <b>3.50E-04</b> | -1.31                                                                                | (-3.56-0.99) | 2.60E-01        | 6.20E-01    | 1.59                                                                                  | (-1.04- 4.29) | 2.36E-01        | 4.91E-01    |
| LPE         | 2.54                                                                                                                                                                             | ( 1.82- 3.30) | <b>3.66E-13</b> | <b>9.16E-12</b> | 2.67                                                                                                                                                                              | ( 1.78- 3.62) | <b>5.31E-10</b> | <b>1.33E-08</b> | -1.66                                                                                | (-3.45-0.17) | 7.42E-02        | 6.07E-01    | -0.61                                                                                 | (-2.99- 1.82) | 6.18E-01        | 7.94E-01    |
| PC          | -0.56                                                                                                                                                                            | (-1.19- 0.12) | 1.04E-01        | 1.74E-01        | -0.42                                                                                                                                                                             | (-1.24- 0.47) | 3.44E-01        | 8.60E-01        | -0.21                                                                                | (-1.73-1.33) | 7.82E-01        | 8.51E-01    | -0.20                                                                                 | (-2.08- 1.73) | 8.39E-01        | 9.03E-01    |
| PC(O)       | -0.10                                                                                                                                                                            | (-0.84- 0.69) | 7.92E-01        | 8.36E-01        | -0.04                                                                                                                                                                             | (-0.94- 0.94) | 9.28E-01        | 9.66E-01        | 0.02                                                                                 | (-1.71-1.78) | 9.82E-01        | 9.82E-01    | -0.05                                                                                 | (-2.12- 2.06) | 9.61E-01        | 9.61E-01    |
| PC(P)       | -1.00                                                                                                                                                                            | (-1.68--0.27) | <b>8.01E-03</b> | <b>2.00E-02</b> | -0.71                                                                                                                                                                             | (-1.57- 0.24) | 1.35E-01        | 3.76E-01        | -0.32                                                                                | (-2.14-1.53) | 7.30E-01        | 8.29E-01    | -0.50                                                                                 | (-2.70- 1.75) | 6.59E-01        | 7.94E-01    |
| PE          | -1.12                                                                                                                                                                            | (-1.79--0.39) | <b>3.12E-03</b> | <b>8.68E-03</b> | -0.45                                                                                                                                                                             | (-1.43- 0.63) | 3.94E-01        | 8.87E-01        | 0.74                                                                                 | (-2.19-3.76) | 6.24E-01        | 7.42E-01    | -0.76                                                                                 | (-4.33- 2.94) | 6.81E-01        | 7.94E-01    |
| PE(O)       | -0.08                                                                                                                                                                            | (-0.84- 0.74) | 8.36E-01        | 8.36E-01        | 0.06                                                                                                                                                                              | (-0.88- 1.10) | 9.06E-01        | 9.66E-01        | 0.68                                                                                 | (-1.70-3.13) | 5.75E-01        | 7.19E-01    | 1.01                                                                                  | (-1.85- 3.96) | 4.91E-01        | 7.67E-01    |
| PE(P)       | -0.11                                                                                                                                                                            | (-0.83- 0.66) | 7.63E-01        | 8.36E-01        | 0.20                                                                                                                                                                              | (-0.78- 1.29) | 7.03E-01        | 9.66E-01        | 1.42                                                                                 | (-0.67-3.54) | 1.83E-01        | 6.07E-01    | 1.57                                                                                  | (-0.89- 4.09) | 2.11E-01        | 4.78E-01    |
| PG          | -1.47                                                                                                                                                                            | (-2.50--0.31) | <b>1.49E-02</b> | <b>3.39E-02</b> | -0.23                                                                                                                                                                             | (-1.74- 1.56) | 7.86E-01        | 9.66E-01        | 1.59                                                                                 | (-1.39-4.66) | 2.98E-01        | 6.20E-01    | 3.25                                                                                  | (-0.42- 7.06) | 8.29E-02        | 2.96E-01    |
| PI          | -0.58                                                                                                                                                                            | (-1.07--0.06) | <b>2.80E-02</b> | 5.38E-02        | -0.23                                                                                                                                                                             | (-0.90- 0.50) | 5.32E-01        | 8.87E-01        | -1.23                                                                                | (-2.80-0.37) | 1.30E-01        | 6.07E-01    | -0.18                                                                                 | (-2.27- 1.95) | 8.67E-01        | 9.03E-01    |



**Table S4B.** Sex difference in association studies with birth weight and child BMI in terms of species levels.

| Studies |               | Birth Weight (cord blood) - Male<br>adjusted for ethnicity, maternal age, maternal education level, pre-pregnancy BMI, total gestational weight gain, gestational age and parity |               |                 |                 | Birth Weight (cord blood) - Female<br>adjusted for ethnicity, maternal age, maternal education level, pre-pregnancy BMI, total gestational weight gain, gestational age and parity |               |                 |                 | Child BMI (6-year-old) - Male<br>adjusted for ethnicity and maternal education level |               |                 |                 | Child BMI (6-year-old) - Female<br>adjusted for ethnicity and maternal education level |               |                 |                 |
|---------|---------------|----------------------------------------------------------------------------------------------------------------------------------------------------------------------------------|---------------|-----------------|-----------------|------------------------------------------------------------------------------------------------------------------------------------------------------------------------------------|---------------|-----------------|-----------------|--------------------------------------------------------------------------------------|---------------|-----------------|-----------------|----------------------------------------------------------------------------------------|---------------|-----------------|-----------------|
| No.     | Lipid Species | %change in lipid concentration per 100 grams                                                                                                                                     | 95%CI         | p-value         | p-value(BH)     | %change in lipid concentration per 100 grams                                                                                                                                       | 95%CI         | p-value         | p-value(BH)     | %change in lipid concentration per unit BMI                                          | 95%CI         | p-value         | p-value(BH)     | %change in lipid concentration per unit BMI                                            | 95%CI         | p-value         | p-value(BH)     |
| 1       | AC(12:0)      | -1.55                                                                                                                                                                            | (-2.29--0.75) | <b>2.80E-04</b> | <b>8.56E-04</b> | -1.39                                                                                                                                                                              | (-2.33--0.33) | <b>1.19E-02</b> | <b>4.10E-02</b> | -0.10                                                                                | (-3.26- 3.15) | 9.49E-01        | 9.83E-01        | -2.70                                                                                  | (-6.60- 1.35) | 1.87E-01        | 3.70E-01        |
| 2       | AC(13:0)      | -1.05                                                                                                                                                                            | (-2.40- 0.54) | 1.83E-01        | 2.90E-01        | -1.14                                                                                                                                                                              | (-2.80- 0.89) | 2.49E-01        | 4.38E-01        | 3.09                                                                                 | (-1.44- 7.82) | 1.83E-01        | 4.24E-01        | -1.31                                                                                  | (-6.81- 4.51) | 6.50E-01        | 8.08E-01        |
| 3       | AC(14:0)      | -1.18                                                                                                                                                                            | (-1.87--0.42) | <b>3.07E-03</b> | <b>8.02E-03</b> | -0.61                                                                                                                                                                              | (-1.54- 0.43) | 2.43E-01        | 4.31E-01        | 0.19                                                                                 | (-2.16- 2.60) | 8.75E-01        | 9.47E-01        | -2.93                                                                                  | (-5.92- 0.14) | 6.12E-02        | 1.88E-01        |
| 4       | AC(14:1)      | -0.99                                                                                                                                                                            | (-1.84--0.05) | <b>3.96E-02</b> | 7.73E-02        | -1.10                                                                                                                                                                              | (-2.13- 0.06) | 6.17E-02        | 1.56E-01        | -0.67                                                                                | (-4.11- 2.88) | 7.04E-01        | 8.83E-01        | -3.22                                                                                  | (-7.33- 1.06) | 1.37E-01        | 3.14E-01        |
| 5       | AC(14:2)      | -1.15                                                                                                                                                                            | (-1.83--0.41) | <b>2.88E-03</b> | <b>7.61E-03</b> | -0.59                                                                                                                                                                              | (-1.49- 0.41) | 2.40E-01        | 4.30E-01        | -0.20                                                                                | (-3.28- 2.98) | 9.02E-01        | 9.64E-01        | -2.92                                                                                  | (-6.94- 1.28) | 1.69E-01        | 3.54E-01        |
| 6       | AC(16:0)      | -0.83                                                                                                                                                                            | (-1.49--0.11) | <b>2.41E-02</b> | 5.01E-02        | 0.25                                                                                                                                                                               | (-0.63- 1.20) | 5.89E-01        | 7.63E-01        | 0.21                                                                                 | (-1.33- 1.76) | 7.92E-01        | 9.16E-01        | -1.11                                                                                  | (-3.00- 0.81) | 2.53E-01        | 4.44E-01        |
| 7       | AC(16:1)      | -1.15                                                                                                                                                                            | (-1.98--0.25) | <b>1.40E-02</b> | <b>3.08E-02</b> | -0.62                                                                                                                                                                              | (-1.64- 0.54) | 2.82E-01        | 4.75E-01        | 0.97                                                                                 | (-1.63- 3.64) | 4.67E-01        | 7.19E-01        | -1.48                                                                                  | (-4.69- 1.83) | 3.73E-01        | 5.66E-01        |
| 8       | AC(18:0)      | -1.07                                                                                                                                                                            | (-1.70--0.38) | <b>2.94E-03</b> | <b>7.72E-03</b> | -0.25                                                                                                                                                                              | (-1.12- 0.69) | 5.85E-01        | 7.61E-01        | -1.51                                                                                | (-3.37- 0.38) | 1.16E-01        | 3.23E-01        | -2.29                                                                                  | (-4.23--0.31) | <b>2.42E-02</b> | 1.13E-01        |
| 9       | AC(18:1)      | -0.19                                                                                                                                                                            | (-1.08- 0.78) | 6.86E-01        | 7.66E-01        | 0.76                                                                                                                                                                               | (-0.31- 1.94) | 1.69E-01        | 3.37E-01        | -0.29                                                                                | (-2.16- 1.62) | 7.66E-01        | 9.12E-01        | -0.68                                                                                  | (-2.84- 1.53) | 5.43E-01        | 7.15E-01        |
| 10      | AC(18:2)      | -1.15                                                                                                                                                                            | (-1.90--0.32) | <b>7.70E-03</b> | <b>1.82E-02</b> | 0.80                                                                                                                                                                               | (-0.23- 1.94) | 1.33E-01        | 2.80E-01        | 0.07                                                                                 | (-1.58- 1.75) | 9.34E-01        | 9.76E-01        | -0.58                                                                                  | (-2.82- 1.71) | 6.12E-01        | 7.74E-01        |
| 11      | CE(14:0)      | -0.36                                                                                                                                                                            | (-1.04- 0.36) | 3.17E-01        | 4.49E-01        | -0.68                                                                                                                                                                              | (-1.50- 0.21) | 1.30E-01        | 2.75E-01        | 2.68                                                                                 | ( 0.50- 4.90) | <b>1.59E-02</b> | 9.00E-02        | 1.44                                                                                   | (-1.34- 4.29) | 3.10E-01        | 5.08E-01        |
| 12      | CE(16:1)      | 1.66                                                                                                                                                                             | ( 0.73- 2.66) | <b>3.09E-04</b> | <b>9.28E-04</b> | 0.19                                                                                                                                                                               | (-0.76- 1.24) | 7.07E-01        | 8.47E-01        | 5.39                                                                                 | ( 3.07- 7.76) | <b>6.25E-06</b> | <b>1.50E-03</b> | 6.14                                                                                   | ( 3.51- 8.85) | <b>6.52E-06</b> | <b>1.04E-03</b> |
| 13      | CE(18:0)      | 0.37                                                                                                                                                                             | (-0.68- 1.54) | 5.01E-01        | 6.25E-01        | 0.32                                                                                                                                                                               | (-0.81- 1.60) | 5.90E-01        | 7.63E-01        | -0.70                                                                                | (-2.78- 1.44) | 5.18E-01        | 7.51E-01        | 2.88                                                                                   | (-0.05- 5.89) | 5.41E-02        | 1.76E-01        |
| 14      | CE(18:1)      | 0.38                                                                                                                                                                             | (-0.21- 1.02) | 2.13E-01        | 3.28E-01        | -0.15                                                                                                                                                                              | (-0.78- 0.51) | 6.38E-01        | 8.04E-01        | 0.10                                                                                 | (-0.92- 1.13) | 8.48E-01        | 9.40E-01        | 0.71                                                                                   | (-0.63- 2.07) | 2.96E-01        | 4.94E-01        |
| 15      | CE(18:2)      | -0.77                                                                                                                                                                            | (-1.37--0.12) | <b>2.02E-02</b> | <b>4.22E-02</b> | 0.13                                                                                                                                                                               | (-0.70- 1.04) | 7.60E-01        | 8.85E-01        | 0.13                                                                                 | (-1.29- 1.57) | 8.59E-01        | 9.40E-01        | 0.65                                                                                   | (-0.78- 2.09) | 3.74E-01        | 5.66E-01        |
| 16      | CE(18:3)      | 0.10                                                                                                                                                                             | (-0.98- 1.31) | 8.60E-01        | 9.13E-01        | 0.68                                                                                                                                                                               | (-0.71- 2.27) | 3.52E-01        | 5.54E-01        | 2.38                                                                                 | (-0.29- 5.11) | 8.07E-02        | 2.53E-01        | 3.38                                                                                   | (-0.03- 6.90) | 5.17E-02        | 1.71E-01        |
| 17      | CE(20:1)      | 1.28                                                                                                                                                                             | ( 0.11- 2.58) | <b>3.06E-02</b> | 6.24E-02        | -0.37                                                                                                                                                                              | (-1.47- 0.88) | 5.44E-01        | 7.32E-01        | -1.79                                                                                | (-3.52--0.02) | <b>4.70E-02</b> | 1.97E-01        | -0.44                                                                                  | (-2.40- 1.55) | 6.58E-01        | 8.10E-01        |
| 18      | CE(20:2)      | 1.17                                                                                                                                                                             | ( 0.30- 2.12) | <b>7.56E-03</b> | <b>1.80E-02</b> | 0.23                                                                                                                                                                               | (-0.68- 1.22) | 6.38E-01        | 8.04E-01        | 0.00                                                                                 | (-1.42- 1.44) | 9.99E-01        | 9.99E-01        | 0.94                                                                                   | (-0.79- 2.70) | 2.86E-01        | 4.81E-01        |
| 19      | CE(20:4)      | -0.38                                                                                                                                                                            | (-1.07- 0.37) | 3.11E-01        | 4.44E-01        | 0.18                                                                                                                                                                               | (-0.76- 1.21) | 7.14E-01        | 8.47E-01        | 0.77                                                                                 | (-1.10- 2.67) | 4.20E-01        | 6.78E-01        | -0.10                                                                                  | (-2.65- 2.52) | 9.42E-01        | 9.75E-01        |
| 20      | CE(20:5)      | -2.79                                                                                                                                                                            | (-4.02--1.30) | <b>6.99E-04</b> | <b>2.00E-03</b> | -1.80                                                                                                                                                                              | (-3.35- 0.12) | 6.47E-02        | 1.61E-01        | 4.14                                                                                 | ( 0.08- 8.37) | <b>4.58E-02</b> | 1.95E-01        | 3.58                                                                                   | (-2.12- 9.61) | 2.21E-01        | 4.16E-01        |
| 21      | CE(22:5) (n6) | 0.42                                                                                                                                                                             | (-0.56- 1.51) | 4.11E-01        | 5.44E-01        | 0.44                                                                                                                                                                               | (-0.74- 1.76) | 4.80E-01        | 6.66E-01        | 0.91                                                                                 | (-0.98- 2.84) | 3.44E-01        | 6.22E-01        | 1.14                                                                                   | (-0.95- 3.27) | 2.87E-01        | 4.81E-01        |
| 22      | CE(22:6)      | -2.22                                                                                                                                                                            | (-3.18--1.13) | <b>1.99E-04</b> | <b>6.27E-04</b> | -1.50                                                                                                                                                                              | (-2.75--0.05) | <b>4.32E-02</b> | 1.18E-01        | 2.64                                                                                 | (-0.21- 5.56) | 6.93E-02        | 2.38E-01        | 1.44                                                                                   | (-1.89- 4.88) | 3.98E-01        | 5.90E-01        |
| 23      | CE(24:5)      | -2.66                                                                                                                                                                            | (-3.77--1.34) | <b>2.75E-04</b> | <b>8.45E-04</b> | -3.18                                                                                                                                                                              | (-4.29--1.85) | <b>3.17E-05</b> | <b>3.05E-04</b> | -2.06                                                                                | (-4.70- 0.66) | 1.35E-01        | 3.48E-01        | -0.11                                                                                  | (-2.85- 2.70) | 9.37E-01        | 9.75E-01        |
| 24      | CE(24:6)      | -0.72                                                                                                                                                                            | (-1.96- 0.72) | 3.11E-01        | 4.44E-01        | -1.59                                                                                                                                                                              | (-2.88--0.06) | <b>4.25E-02</b> | 1.16E-01        | -0.14                                                                                | (-2.51- 2.29) | 9.08E-01        | 9.66E-01        | 2.09                                                                                   | (-1.39- 5.69) | 2.41E-01        | 4.32E-01        |
| 25      | DG(16:0_16:1) | -1.88                                                                                                                                                                            | (-2.82--0.81) | <b>9.94E-04</b> | <b>2.76E-03</b> | -0.43                                                                                                                                                                              | (-1.79- 1.15) | 5.71E-01        | 7.51E-01        | 5.60                                                                                 | ( 2.49- 8.79) | <b>4.07E-04</b> | <b>1.50E-02</b> | 7.08                                                                                   | ( 2.48-11.88) | <b>2.47E-03</b> | <b>2.97E-02</b> |
| 26      | DG(14:0_18:2) | -3.22                                                                                                                                                                            | (-4.38--1.82) | <b>5.89E-05</b> | <b>2.02E-04</b> | -2.69                                                                                                                                                                              | (-4.28--0.66) | <b>1.23E-02</b> | <b>4.20E-02</b> | 4.96                                                                                 | ( 0.30- 9.84) | <b>3.66E-02</b> | 1.64E-01        | 9.36                                                                                   | ( 3.33-15.75) | <b>2.21E-03</b> | <b>2.72E-02</b> |
| 27      | DG(16:0_18:1) | -2.54                                                                                                                                                                            | (-3.32--1.67) | <b>3.15E-07</b> | <b>1.41E-06</b> | -0.88                                                                                                                                                                              | (-2.05- 0.45) | 1.84E-01        | 3.57E-01        | 2.76                                                                                 | (-0.43- 6.05) | 9.02E-02        | 2.70E-01        | 5.44                                                                                   | ( 1.29- 9.76) | <b>1.01E-02</b> | 6.90E-02        |
| 28      | DG(16:1_18:1) | -2.51                                                                                                                                                                            | (-3.34--1.57) | <b>2.13E-06</b> | <b>8.66E-06</b> | -1.33                                                                                                                                                                              | (-2.53- 0.06) | 5.94E-02        | 1.53E-01        | 5.07                                                                                 | ( 1.31- 8.98) | <b>8.12E-03</b> | 6.04E-02        | 7.86                                                                                   | ( 3.21-12.72) | <b>8.87E-04</b> | <b>1.90E-02</b> |
| 29      | DG(16:0_18:2) | -3.79                                                                                                                                                                            | (-4.59--2.88) | <b>3.80E-11</b> | <b>3.04E-10</b> | -1.96                                                                                                                                                                              | (-3.17--0.53) | <b>9.02E-03</b> | <b>3.16E-02</b> | 2.63                                                                                 | (-0.54- 5.90) | 1.04E-01        | 2.94E-01        | 5.97                                                                                   | ( 2.18- 9.90) | <b>2.02E-03</b> | <b>2.63E-02</b> |
| 30      | DG(18:0_18:1) | -1.73                                                                                                                                                                            | (-2.56--0.81) | <b>4.38E-04</b> | <b>1.29E-03</b> | -0.61                                                                                                                                                                              | (-1.82- 0.78) | 3.72E-01        | 5.75E-01        | 2.91                                                                                 | ( 0.07- 5.84) | <b>4.47E-02</b> | 1.93E-01        | 5.77                                                                                   | ( 1.69-10.00) | <b>5.45E-03</b> | <b>4.59E-02</b> |
| 31      | DG(18:1_18:1) | -2.22                                                                                                                                                                            | (-3.01--1.33) | <b>6.57E-06</b> | <b>2.50E-05</b> | -1.24                                                                                                                                                                              | (-2.31--0.02) | <b>4.73E-02</b> | 1.27E-01        | 1.16                                                                                 | (-1.81- 4.23) | 4.45E-01        | 6.97E-01        | 3.38                                                                                   | (-0.31- 7.20) | 7.26E-02        | 2.10E-01        |
| 32      | DG(18:0_18:2) | -2.55                                                                                                                                                                            | (-3.58--1.36) | <b>1.20E-04</b> | <b>3.97E-04</b> | -0.19                                                                                                                                                                              | (-1.81- 1.76) | 8.38E-01        | 9.33E-01        | 2.56                                                                                 | (-0.52- 5.74) | 1.03E-01        | 2.93E-01        | 5.71                                                                                   | ( 1.57-10.02) | <b>6.78E-03</b> | 5.51E-02        |
| 33      | DG(18:1_18:2) | -3.75                                                                                                                                                                            | (-4.45--2.96) | <b>9.13E-14</b> | <b>1.14E-12</b> | -2.19                                                                                                                                                                              | (-3.30--0.90) | <b>1.57E-03</b> | <b>6.92E-03</b> | 0.82                                                                                 | (-2.10- 3.83) | 5.85E-01        | 8.05E-01        | 3.57                                                                                   | ( 0.14- 7.13) | <b>4.14E-02</b> | 1.54E-01        |
| 34      | DG(18:2_18:2) | -4.90                                                                                                                                                                            | (-5.67--3.99) | <b>1.12E-14</b> | <b>1.85E-13</b> | -2.89                                                                                                                                                                              | (-4.13--1.39) | <b>5.37E-04</b> | <b>2.93E-03</b> | 1.30                                                                                 | (-2.03- 4.75) | 4.46E-01        | 6.97E-01        | 4.10                                                                                   | ( 0.00- 8.37) | <b>4.99E-02</b> | 1.71E-01        |
| 35      | DG(18:1_18:3) | -3.19                                                                                                                                                                            | (-4.08--2.15) | <b>1.73E-07</b> | <b>8.05E-07</b> | -1.52                                                                                                                                                                              | (-2.89- 0.12) | 6.76E-02        | 1.67E-01        | 1.95                                                                                 | (-1.75- 5.79) | 3.04E-01        | 5.75E-01        | 5.41                                                                                   | ( 1.17- 9.83) | <b>1.23E-02</b> | 7.46E-02        |
| 36      | DG(16:0_20:4) | -2.73                                                                                                                                                                            | (-3.63--1.69) | <b>3.52E-06</b> | <b>1.39E-05</b> | -0.95                                                                                                                                                                              | (-2.29- 0.63) | 2.23E-01        | 4.08E-01        | 4.44                                                                                 | ( 1.01- 7.98) | <b>1.10E-02</b> | 6.76E-02        | 6.02                                                                                   | ( 1.85-10.35) | <b>4.58E-03</b> | <b>4.18E-02</b> |
| 37      | DG(18:1_20:3) | -0.41                                                                                                                                                                            | (-1.44- 0.75) | 4.76E-01        | 6.03E-01        | 0.00                                                                                                                                                                               | (-1.21- 1.38) | 9.99E-01        | 9.99E-01        | -0.05                                                                                | (-3.17- 3.18) | 9.77E-01        | 9.94E-01        | 3.24                                                                                   | (-0.57- 7.20) | 9.57E-02        | 2.50E-01        |
| 38      | DG(18:1_20:4) | -2.44                                                                                                                                                                            | (-3.23--1.56) | <b>9.71E-07</b> | <b>4.02E-06</b> | -1.43                                                                                                                                                                              | (-2.51--0.20) | <b>2.48E-02</b> | 7.31E-02        | 3.22                                                                                 | ( 0.37- 6.14) | <b>2.67E-02</b> | 1.29E-01        | 5.18                                                                                   | ( 1.62- 8.87) | <b>4.35E-03</b> | <b>4.17E-02</b> |
| 39      | DG(16:0_22:5) | -2.24                                                                                                                                                                            | (-3.18--1.17) | <b>1.36E-04</b> | <b>4.40E-04</b> | -1.33                                                                                                                                                                              | (-2.64- 0.22) | 8.92E-02        | 2.04E-01        | 2.97                                                                                 | (-0.34- 6.39) | 7.91E-02        | 2.50E-01        | 7.25                                                                                   | ( 3.11-11.56) | <b>5.90E-04</b> | <b>1.57E-02</b> |

|    |                    |       |               |                 |                 |       |               |                 |                 |       |               |                 |                 |       |               |                 |                 |
|----|--------------------|-------|---------------|-----------------|-----------------|-------|---------------|-----------------|-----------------|-------|---------------|-----------------|-----------------|-------|---------------|-----------------|-----------------|
| 40 | DG(18:2_20:4)      | -3.51 | (-4.37--2.51) | <b>7.48E-09</b> | <b>4.23E-08</b> | -2.60 | (-3.82--1.13) | <b>1.21E-03</b> | <b>5.67E-03</b> | 3.79  | (0.56- 7.13)  | <b>2.13E-02</b> | 1.10E-01        | 5.07  | (1.23- 9.06)  | <b>9.64E-03</b> | 6.72E-02        |
| 41 | DG(16:0_22:6)      | -4.54 | (-5.36--3.59) | <b>1.43E-12</b> | <b>1.43E-11</b> | -3.35 | (-4.46--2.00) | <b>1.79E-05</b> | <b>1.87E-04</b> | 5.24  | (0.67-10.01)  | <b>2.42E-02</b> | 1.21E-01        | 5.67  | (0.73-10.85)  | <b>2.43E-02</b> | 1.13E-01        |
| 42 | DG(18:1_22:5)      | -1.93 | (-2.92--0.80) | <b>1.41E-03</b> | <b>3.82E-03</b> | -1.94 | (-3.11--0.58) | <b>6.78E-03</b> | <b>2.58E-02</b> | 0.81  | (-2.44- 4.17) | 6.28E-01        | 8.41E-01        | 2.39  | (-0.96- 5.86) | 1.63E-01        | 3.44E-01        |
| 43 | DG(18:1_22:6)      | -3.76 | (-4.58--2.81) | <b>1.91E-10</b> | <b>1.37E-09</b> | -3.07 | (-4.12--1.81) | <b>1.92E-05</b> | <b>1.92E-04</b> | 3.21  | (-0.40- 6.95) | 8.20E-02        | 2.56E-01        | 5.85  | (1.28-10.63)  | <b>1.20E-02</b> | 7.38E-02        |
| 44 | DG(18:2_22:6)      | -4.58 | (-5.42--3.59) | <b>5.13E-12</b> | <b>4.56E-11</b> | -3.08 | (-4.42--1.43) | <b>7.99E-04</b> | <b>4.00E-03</b> | 3.42  | (-0.90- 7.93) | 1.21E-01        | 3.31E-01        | 7.28  | (1.88-12.98)  | <b>8.03E-03</b> | 6.02E-02        |
| 45 | TG(48:0) [NL-18:0] | -2.22 | (-3.17--1.13) | <b>1.87E-04</b> | <b>5.94E-04</b> | -0.01 | (-1.56- 1.82) | 9.88E-01        | 9.94E-01        | 7.53  | (2.92-12.35)  | <b>1.30E-03</b> | <b>2.49E-02</b> | 7.33  | (1.10-13.95)  | <b>2.08E-02</b> | 1.05E-01        |
| 46 | TG(48:1) [NL-16:1] | -3.12 | (-4.11--1.98) | <b>2.70E-06</b> | <b>1.09E-05</b> | -1.26 | (-2.92- 0.79) | 2.11E-01        | 3.96E-01        | 9.50  | (4.81-14.39)  | <b>6.51E-05</b> | <b>4.46E-03</b> | 9.88  | (3.77-16.34)  | <b>1.40E-03</b> | <b>2.49E-02</b> |
| 47 | TG(48:1) [NL-18:1] | -3.72 | (-4.59--2.71) | <b>2.17E-09</b> | <b>1.37E-08</b> | -2.13 | (-3.61--0.31) | <b>2.43E-02</b> | 7.22E-02        | 7.66  | (2.32-13.28)  | <b>4.71E-03</b> | <b>4.82E-02</b> | 9.11  | (2.17-16.51)  | <b>9.66E-03</b> | 6.72E-02        |
| 48 | TG(48:2) [NL-14:0] | -4.21 | (-5.01--3.29) | <b>2.40E-12</b> | <b>2.31E-11</b> | -2.93 | (-4.22--1.36) | <b>7.95E-04</b> | <b>4.00E-03</b> | 7.99  | (2.52-13.76)  | <b>3.97E-03</b> | <b>4.82E-02</b> | 10.05 | (3.00-17.58)  | <b>4.88E-03</b> | <b>4.18E-02</b> |
| 49 | TG(48:2) [NL-14:1] | -3.30 | (-4.17--2.29) | <b>4.21E-08</b> | <b>2.06E-07</b> | -2.60 | (-3.88--1.04) | <b>2.05E-03</b> | <b>8.87E-03</b> | 9.57  | (4.45-14.93)  | <b>2.21E-04</b> | <b>9.89E-03</b> | 7.84  | (1.05-15.09)  | <b>2.33E-02</b> | 1.11E-01        |
| 50 | TG(48:2) [NL-16:1] | -3.18 | (-4.11--2.10) | <b>5.04E-07</b> | <b>2.18E-06</b> | -2.21 | (-3.60--0.51) | <b>1.32E-02</b> | <b>4.40E-02</b> | 10.34 | (5.02-15.92)  | <b>1.21E-04</b> | <b>6.46E-03</b> | 11.55 | (4.79-18.75)  | <b>7.22E-04</b> | <b>1.76E-02</b> |
| 51 | TG(48:2) [NL-18:2] | -4.78 | (-5.58--3.84) | <b>1.42E-13</b> | <b>1.66E-12</b> | -2.99 | (-4.34--1.31) | <b>1.26E-03</b> | <b>5.81E-03</b> | 7.95  | (2.40-13.79)  | <b>4.73E-03</b> | <b>4.82E-02</b> | 9.77  | (2.92-17.08)  | <b>4.87E-03</b> | <b>4.18E-02</b> |
| 52 | TG(48:3) [NL-14:0] | -4.43 | (-5.23--3.51) | <b>5.69E-13</b> | <b>6.35E-12</b> | -3.39 | (-4.62--1.87) | <b>1.03E-04</b> | <b>8.22E-04</b> | 8.83  | (3.18-14.78)  | <b>2.02E-03</b> | <b>3.23E-02</b> | 11.17 | (4.21-18.60)  | <b>1.49E-03</b> | <b>2.56E-02</b> |
| 53 | TG(48:3) [NL-16:1] | -3.11 | (-3.96--2.15) | <b>4.59E-08</b> | <b>2.22E-07</b> | -2.48 | (-3.66--1.08) | <b>1.12E-03</b> | <b>5.34E-03</b> | 8.05  | (3.43-12.88)  | <b>5.94E-04</b> | <b>1.59E-02</b> | 9.57  | (3.77-15.69)  | <b>1.13E-03</b> | <b>2.08E-02</b> |
| 54 | TG(48:3) [NL-18:3] | -3.79 | (-4.56--2.91) | <b>8.55E-12</b> | <b>7.33E-11</b> | -2.31 | (-3.52--0.87) | <b>2.79E-03</b> | <b>1.16E-02</b> | 8.11  | (2.36-14.17)  | <b>5.40E-03</b> | <b>4.82E-02</b> | 8.74  | (1.44-16.57)  | <b>1.85E-02</b> | 9.75E-02        |
| 55 | TG(49:1) [NL-17:1] | -2.57 | (-3.37--1.67) | <b>5.47E-07</b> | <b>2.34E-06</b> | -1.52 | (-2.61--0.27) | <b>1.89E-02</b> | 5.89E-02        | 4.87  | (1.86- 7.96)  | <b>1.50E-03</b> | <b>2.77E-02</b> | 5.00  | (0.73- 9.45)  | <b>2.16E-02</b> | 1.06E-01        |
| 56 | TG(50:1) [NL-14:0] | -2.17 | (-3.16--1.03) | <b>4.53E-04</b> | <b>1.32E-03</b> | -0.23 | (-1.87- 1.74) | 8.05E-01        | 9.14E-01        | 6.29  | (2.13-10.62)  | <b>2.96E-03</b> | <b>3.98E-02</b> | 7.98  | (2.08-14.21)  | <b>7.72E-03</b> | 5.98E-02        |
| 57 | TG(50:1) [NL-16:0] | -3.30 | (-4.13--2.35) | <b>6.72E-09</b> | <b>3.84E-08</b> | -1.09 | (-2.55- 0.65) | 2.04E-01        | 3.85E-01        | 4.46  | (1.31- 7.70)  | <b>5.42E-03</b> | <b>4.82E-02</b> | 4.85  | (0.60- 9.29)  | <b>2.53E-02</b> | 1.16E-01        |
| 58 | TG(50:1) [NL-18:1] | -3.08 | (-3.94--2.09) | <b>1.04E-07</b> | <b>4.95E-07</b> | -1.46 | (-2.85- 0.21) | 8.37E-02        | 1.93E-01        | 4.11  | (1.07- 7.24)  | <b>7.95E-03</b> | 6.04E-02        | 4.47  | (0.34- 8.77)  | <b>3.39E-02</b> | 1.35E-01        |
| 59 | TG(50:2) [NL-14:0] | -3.73 | (-4.62--2.69) | <b>5.05E-09</b> | <b>2.99E-08</b> | -2.59 | (-3.95--0.93) | <b>3.78E-03</b> | <b>1.54E-02</b> | 3.78  | (-0.34- 8.07) | 7.26E-02        | 2.45E-01        | 5.30  | (0.07-10.80)  | <b>4.68E-02</b> | 1.67E-01        |
| 60 | TG(50:2) [NL-16:1] | -3.52 | (-4.43--2.47) | <b>3.08E-08</b> | <b>1.62E-07</b> | -2.09 | (-3.54--0.30) | <b>2.41E-02</b> | 7.22E-02        | 5.88  | (1.92-10.00)  | <b>3.51E-03</b> | <b>4.51E-02</b> | 7.56  | (2.75-12.60)  | <b>1.98E-03</b> | <b>2.63E-02</b> |
| 61 | TG(50:2) [NL-18:1] | -3.55 | (-4.47--2.48) | <b>3.91E-08</b> | <b>1.95E-07</b> | -2.31 | (-3.74--0.56) | <b>1.23E-02</b> | <b>4.20E-02</b> | 5.45  | (1.48- 9.58)  | <b>7.00E-03</b> | 5.60E-02        | 7.61  | (2.81-12.63)  | <b>1.82E-03</b> | <b>2.63E-02</b> |
| 62 | TG(50:2) [NL-18:2] | -5.03 | (-5.82--4.09) | <b>2.94E-14</b> | <b>3.92E-13</b> | -2.65 | (-4.14--0.79) | <b>7.57E-03</b> | <b>2.82E-02</b> | 4.85  | (1.65- 8.16)  | <b>2.98E-03</b> | <b>3.98E-02</b> | 4.31  | (0.54- 8.22)  | <b>2.48E-02</b> | 1.14E-01        |
| 63 | TG(50:3) [NL-14:0] | -4.63 | (-5.44--3.68) | <b>6.63E-13</b> | <b>7.24E-12</b> | -3.57 | (-4.82--2.03) | <b>6.73E-05</b> | <b>5.57E-04</b> | 4.38  | (-0.26- 9.22) | 6.42E-02        | 2.28E-01        | 7.21  | (1.46-13.28)  | <b>1.37E-02</b> | 7.82E-02        |
| 64 | TG(50:3) [NL-14:1] | -2.50 | (-3.48--1.38) | <b>6.15E-05</b> | <b>2.09E-04</b> | -2.01 | (-3.30--0.46) | <b>1.32E-02</b> | <b>4.40E-02</b> | 4.51  | (0.99- 8.16)  | <b>1.20E-02</b> | 7.12E-02        | 3.82  | (-0.97- 8.83) | 1.19E-01        | 2.83E-01        |
| 65 | TG(50:3) [NL-16:1] | -4.37 | (-5.18--3.44) | <b>1.66E-12</b> | <b>1.63E-11</b> | -3.01 | (-4.27--1.47) | <b>4.48E-04</b> | <b>2.57E-03</b> | 7.59  | (3.01-12.37)  | <b>1.10E-03</b> | <b>2.30E-02</b> | 9.80  | (4.47-15.41)  | <b>2.95E-04</b> | <b>1.09E-02</b> |
| 66 | TG(50:3) [NL-18:2] | -5.01 | (-5.76--4.13) | <b>1.19E-15</b> | <b>2.49E-14</b> | -3.22 | (-4.54--1.59) | <b>4.43E-04</b> | <b>2.57E-03</b> | 6.26  | (1.84-10.89)  | <b>5.41E-03</b> | <b>4.82E-02</b> | 8.76  | (3.53-14.26)  | <b>9.67E-04</b> | <b>1.93E-02</b> |
| 67 | TG(50:3) [NL-18:3] | -4.66 | (-5.43--3.77) | <b>2.57E-14</b> | <b>3.53E-13</b> | -2.28 | (-3.75--0.47) | <b>1.62E-02</b> | 5.20E-02        | 5.99  | (1.39-10.81)  | <b>1.05E-02</b> | 6.73E-02        | 8.51  | (2.79-14.55)  | <b>3.40E-03</b> | <b>3.55E-02</b> |
| 68 | TG(50:4) [NL-14:0] | -4.84 | (-5.57--3.97) | <b>1.09E-15</b> | <b>2.48E-14</b> | -3.48 | (-4.68--2.00) | <b>4.78E-05</b> | <b>4.17E-04</b> | 4.58  | (-0.16- 9.55) | 5.83E-02        | 2.17E-01        | 6.38  | (0.70-12.37)  | <b>2.74E-02</b> | 1.19E-01        |
| 69 | TG(50:4) [NL-18:3] | -4.57 | (-5.27--3.76) | <b>1.60E-16</b> | <b>7.66E-15</b> | -2.79 | (-4.01--1.33) | <b>5.52E-04</b> | <b>2.97E-03</b> | 6.89  | (2.13-11.88)  | <b>4.40E-03</b> | <b>4.82E-02</b> | 10.01 | (4.14-16.21)  | <b>7.70E-04</b> | <b>1.76E-02</b> |
| 70 | TG(50:4) [NL-20:4] | -4.27 | (-5.17--3.19) | <b>7.40E-10</b> | <b>5.00E-09</b> | -2.20 | (-3.75--0.28) | <b>2.72E-02</b> | 7.78E-02        | 9.73  | (4.17-15.58)  | <b>5.40E-04</b> | <b>1.59E-02</b> | 10.87 | (3.92-18.28)  | <b>1.97E-03</b> | <b>2.63E-02</b> |
| 71 | TG(51:1) [NL-17:0] | -3.15 | (-4.00--2.18) | <b>3.94E-08</b> | <b>1.95E-07</b> | -2.01 | (-3.26--0.52) | <b>1.01E-02</b> | <b>3.51E-02</b> | 4.79  | (1.36- 8.34)  | <b>6.09E-03</b> | 5.13E-02        | 4.99  | (-0.16-10.40) | 5.75E-02        | 1.83E-01        |
| 72 | TG(51:2) [NL-15:0] | -3.51 | (-4.41--2.46) | <b>3.27E-08</b> | <b>1.70E-07</b> | -2.96 | (-4.18--1.48) | <b>3.55E-04</b> | <b>2.21E-03</b> | 2.33  | (-1.42- 6.22) | 2.26E-01        | 4.75E-01        | 3.68  | (-0.75- 8.31) | 1.04E-01        | 2.65E-01        |
| 73 | TG(51:2) [NL-17:0] | -3.68 | (-4.53--2.70) | <b>1.23E-09</b> | <b>8.23E-09</b> | -2.87 | (-4.09--1.40) | <b>4.50E-04</b> | <b>2.57E-03</b> | 4.92  | (1.21- 8.76)  | <b>9.19E-03</b> | 6.39E-02        | 6.43  | (1.49-11.61)  | <b>1.05E-02</b> | 6.90E-02        |
| 74 | TG(51:2) [NL-17:1] | -3.12 | (-3.90--2.23) | <b>3.49E-09</b> | <b>2.15E-08</b> | -2.44 | (-3.49--1.22) | <b>2.81E-04</b> | <b>1.88E-03</b> | 4.39  | (1.04- 7.85)  | <b>1.01E-02</b> | 6.71E-02        | 5.72  | (1.25-10.39)  | <b>1.20E-02</b> | 7.38E-02        |
| 75 | TG(52:1) [NL-18:0] | -2.68 | (-3.68--1.52) | <b>3.70E-05</b> | <b>1.31E-04</b> | -0.47 | (-2.16- 1.59) | 6.29E-01        | 7.96E-01        | 5.25  | (1.63- 8.99)  | <b>4.38E-03</b> | <b>4.82E-02</b> | 6.56  | (1.39-12.00)  | <b>1.26E-02</b> | 7.47E-02        |
| 76 | TG(52:1) [NL-18:1] | -2.69 | (-3.69--1.55) | <b>3.02E-05</b> | <b>1.08E-04</b> | -0.30 | (-2.03- 1.79) | 7.57E-01        | 8.85E-01        | 4.81  | (1.41- 8.33)  | <b>5.55E-03</b> | <b>4.85E-02</b> | 7.03  | (1.90-12.41)  | <b>7.00E-03</b> | 5.51E-02        |
| 77 | TG(52:2) [NL-16:0] | -3.28 | (-4.05--2.41) | <b>5.03E-10</b> | <b>3.45E-09</b> | -1.92 | (-3.07--0.58) | <b>6.63E-03</b> | <b>2.55E-02</b> | 1.44  | (-0.82- 3.75) | 2.13E-01        | 4.62E-01        | 2.66  | (-0.05- 5.43) | 5.40E-02        | 1.76E-01        |
| 78 | TG(52:2) [NL-18:2] | -3.74 | (-4.64--2.69) | <b>7.94E-09</b> | <b>4.43E-08</b> | -1.05 | (-2.65- 0.89) | 2.67E-01        | 4.62E-01        | 3.99  | (0.99- 7.08)  | <b>9.19E-03</b> | 6.39E-02        | 5.33  | (1.49- 9.32)  | <b>6.52E-03</b> | 5.40E-02        |
| 79 | TG(52:3) [NL-16:1] | -3.72 | (-4.60--2.69) | <b>4.42E-09</b> | <b>2.65E-08</b> | -2.79 | (-4.02--1.31) | <b>6.50E-04</b> | <b>3.46E-03</b> | 3.16  | (-0.06- 6.48) | 5.47E-02        | 2.12E-01        | 3.77  | (0.03- 7.65)  | <b>4.81E-02</b> | 1.69E-01        |
| 80 | TG(52:3) [NL-18:2] | -5.00 | (-5.73--4.14) | <b>2.68E-16</b> | <b>1.07E-14</b> | -3.38 | (-4.64--1.82) | <b>1.47E-04</b> | <b>1.14E-03</b> | 1.36  | (-1.28- 4.06) | 3.14E-01        | 5.90E-01        | 2.73  | (-0.16- 5.70) | 6.39E-02        | 1.90E-01        |
| 81 | TG(52:4) [NL-16:1] | -4.96 | (-5.71--4.08) | <b>1.14E-15</b> | <b>2.48E-14</b> | -3.77 | (-4.93--2.34) | <b>9.19E-06</b> | <b>1.05E-04</b> | 3.59  | (-0.53- 7.88) | 8.81E-02        | 2.66E-01        | 5.26  | (0.57-10.17)  | <b>2.77E-02</b> | 1.19E-01        |
| 82 | TG(52:4) [NL-18:2] | -5.66 | (-6.38--4.80) | <b>9.57E-18</b> | <b>7.65E-16</b> | -3.76 | (-5.02--2.17) | <b>5.65E-05</b> | <b>4.76E-04</b> | 3.00  | (-0.87- 7.02) | 1.29E-01        | 3.47E-01        | 4.86  | (0.11- 9.85)  | <b>4.50E-02</b> | 1.62E-01        |
| 83 | TG(52:4) [NL-18:3] | -4.75 | (-5.48--3.90) | <b>1.12E-15</b> | <b>2.48E-14</b> | -2.97 | (-4.26--1.38) | <b>7.42E-04</b> | <b>3.87E-03</b> | 3.67  | (-0.16- 7.65) | 6.01E-02        | 2.20E-01        | 5.99  | (1.18-11.03)  | <b>1.44E-02</b> | 8.16E-02        |
| 84 | TG(52:5) [NL-18:3] | -4.81 | (-5.54--3.97) | <b>3.12E-16</b> | <b>1.07E-14</b> | -3.09 | (-4.29--1.63) | <b>1.81E-04</b> | <b>1.32E-03</b> | 3.83  | (-0.26- 8.10) | 6.66E-02        | 2.33E-01        | 7.81  | (2.65-13.23)  | <b>2.90E-03</b> | <b>3.19E-02</b> |
| 85 | TG(52:5) [NL-20:4] | -4.28 | (-5.14--3.27) | <b>7.13E-11</b> | <b>5.43E-10</b> | -2.50 | (-3.94--0.70) | <b>8.74E-03</b> | <b>3.13E-02</b> | 9.64  | (4.84-14.66)  | <b>7.49E-05</b> | <b>4.49E-03</b> | 11.13 | (5.45-17.11)  | <b>1.09E-04</b> | <b>5.25E-03</b> |

|     |                      |       |               |                 |                 |       |               |                 |                 |       |               |                 |                 |       |               |                 |                 |
|-----|----------------------|-------|---------------|-----------------|-----------------|-------|---------------|-----------------|-----------------|-------|---------------|-----------------|-----------------|-------|---------------|-----------------|-----------------|
| 86  | TG(52:5) [NL-20:5]   | -5.06 | (-5.85--4.13) | <b>2.07E-14</b> | <b>3.01E-13</b> | -3.43 | (-4.69--1.88) | <b>1.15E-04</b> | <b>9.08E-04</b> | 7.27  | (2.99-11.74)  | <b>8.36E-04</b> | <b>2.04E-02</b> | 9.30  | (4.19-14.65)  | <b>3.35E-04</b> | <b>1.14E-02</b> |
| 87  | TG(53:2) [NL-18:1]   | -2.88 | (-3.68--1.99) | <b>2.98E-08</b> | <b>1.60E-07</b> | -2.34 | (-3.40--1.11) | <b>4.81E-04</b> | <b>2.71E-03</b> | 1.38  | (-1.60- 4.45) | 3.67E-01        | 6.37E-01        | 2.62  | (-1.14- 6.53) | 1.73E-01        | 3.57E-01        |
| 88  | TG(54:1) [NL-18:1]   | -1.99 | (-3.09--0.72) | <b>3.33E-03</b> | <b>8.56E-03</b> | -1.10 | (-2.67- 0.82) | 2.41E-01        | 4.30E-01        | 2.86  | (-0.08- 5.88) | 5.64E-02        | 2.17E-01        | 4.57  | (0.39- 8.92)  | <b>3.20E-02</b> | 1.31E-01        |
| 89  | TG(54:2) [NL-18:0]   | -2.33 | (-3.31--1.21) | <b>1.61E-04</b> | <b>5.18E-04</b> | -1.11 | (-2.57- 0.64) | 1.98E-01        | 3.76E-01        | 2.69  | (-0.17- 5.64) | 6.56E-02        | 2.32E-01        | 4.23  | (0.14- 8.48)  | <b>4.26E-02</b> | 1.57E-01        |
| 90  | TG(54:2) [NL-20:1]   | -2.03 | (-3.00--0.91) | <b>7.29E-04</b> | <b>2.06E-03</b> | -1.43 | (-2.77- 0.16) | 7.48E-02        | 1.78E-01        | 0.69  | (-2.44- 3.92) | 6.69E-01        | 8.54E-01        | 3.09  | (-0.72- 7.05) | 1.12E-01        | 2.75E-01        |
| 91  | TG(54:3) [NL-18:1]   | -2.50 | (-3.37--1.52) | <b>5.92E-06</b> | <b>2.29E-05</b> | -1.73 | (-2.89--0.38) | <b>1.40E-02</b> | <b>4.62E-02</b> | -0.38 | (-2.60- 1.88) | 7.35E-01        | 8.86E-01        | 1.10  | (-1.75- 4.04) | 4.51E-01        | 6.33E-01        |
| 92  | TG(54:3) [NL-18:2]   | -3.84 | (-4.60--2.97) | <b>3.74E-12</b> | <b>3.39E-11</b> | -1.87 | (-3.14--0.36) | <b>1.73E-02</b> | 5.50E-02        | 2.13  | (-0.23- 4.54) | 7.65E-02        | 2.45E-01        | 2.55  | (-0.44- 5.63) | 9.51E-02        | 2.50E-01        |
| 93  | TG(54:4) [NL-18:2]   | -4.54 | (-5.34--3.59) | <b>7.27E-13</b> | <b>7.59E-12</b> | -3.20 | (-4.49--1.62) | <b>3.40E-04</b> | <b>2.19E-03</b> | 0.22  | (-2.47- 2.98) | 8.76E-01        | 9.47E-01        | 1.43  | (-2.12- 5.10) | 4.33E-01        | 6.15E-01        |
| 94  | TG(54:4) [NL-20:3]   | -3.15 | (-4.06--2.09) | <b>3.70E-07</b> | <b>1.63E-06</b> | -1.95 | (-3.36--0.24) | <b>2.72E-02</b> | 7.78E-02        | 4.06  | (0.73- 7.50)  | <b>1.67E-02</b> | 9.22E-02        | 6.70  | (2.74-10.82)  | <b>9.11E-04</b> | <b>1.90E-02</b> |
| 95  | TG(54:5) [NL-18:3]   | -4.38 | (-5.12--3.54) | <b>1.18E-14</b> | <b>1.85E-13</b> | -2.71 | (-3.93--1.24) | <b>8.01E-04</b> | <b>4.00E-03</b> | 1.63  | (-2.12- 5.52) | 3.98E-01        | 6.68E-01        | 5.33  | (0.39-10.50)  | <b>3.41E-02</b> | 1.35E-01        |
| 96  | TG(54:5) [NL-20:4]   | -4.47 | (-5.29--3.51) | <b>2.78E-12</b> | <b>2.56E-11</b> | -2.41 | (-3.89--0.57) | <b>1.28E-02</b> | <b>4.34E-02</b> | 5.48  | (2.17- 8.90)  | <b>1.17E-03</b> | <b>2.34E-02</b> | 6.77  | (3.23-10.43)  | <b>1.81E-04</b> | <b>7.88E-03</b> |
| 97  | TG(54:6) [NL-18:3]   | -4.46 | (-5.21--3.59) | <b>2.51E-14</b> | <b>3.53E-13</b> | -2.83 | (-4.04--1.36) | <b>5.10E-04</b> | <b>2.82E-03</b> | 1.25  | (-2.82- 5.50) | 5.50E-01        | 7.82E-01        | 6.09  | (0.82-11.62)  | <b>2.31E-02</b> | 1.11E-01        |
| 98  | TG(54:6) [NL-20:4]   | -4.82 | (-5.61--3.88) | <b>9.29E-14</b> | <b>1.14E-12</b> | -2.87 | (-4.25--1.16) | <b>2.15E-03</b> | <b>9.22E-03</b> | 6.68  | (2.90-10.60)  | <b>5.14E-04</b> | <b>1.59E-02</b> | 9.25  | (4.84-13.84)  | <b>3.85E-05</b> | <b>3.08E-03</b> |
| 99  | TG(54:6) [NL-20:5]   | -5.63 | (-6.35--4.75) | <b>2.45E-17</b> | <b>1.47E-15</b> | -3.99 | (-5.22--2.43) | <b>1.89E-05</b> | <b>1.92E-04</b> | 7.67  | (3.27-12.26)  | <b>5.97E-04</b> | <b>1.59E-02</b> | 10.66 | (5.44-16.14)  | <b>5.87E-05</b> | <b>4.03E-03</b> |
| 100 | TG(54:6) [NL-22:6]   | -5.67 | (-6.44--4.73) | <b>1.49E-15</b> | <b>2.97E-14</b> | -4.31 | (-5.49--2.82) | <b>2.99E-06</b> | <b>4.09E-05</b> | 8.61  | (3.84-13.59)  | <b>3.69E-04</b> | <b>1.47E-02</b> | 7.77  | (1.81-14.07)  | <b>1.02E-02</b> | 6.90E-02        |
| 101 | TG(54:7) [NL-20:5]   | -5.55 | (-6.29--4.66) | <b>9.60E-17</b> | <b>5.12E-15</b> | -4.07 | (-5.26--2.58) | <b>6.79E-06</b> | <b>8.14E-05</b> | 7.69  | (3.39-12.17)  | <b>4.37E-04</b> | <b>1.50E-02</b> | 10.93 | (5.96-16.14)  | <b>1.59E-05</b> | <b>1.53E-03</b> |
| 102 | TG(54:7) [NL-22:6]   | -5.27 | (-6.06--4.34) | <b>7.77E-15</b> | <b>1.33E-13</b> | -4.34 | (-5.40--3.02) | <b>1.65E-07</b> | <b>3.61E-06</b> | 10.45 | (5.29-15.86)  | <b>6.36E-05</b> | <b>4.46E-03</b> | 10.52 | (4.54-16.84)  | <b>5.16E-04</b> | <b>1.46E-02</b> |
| 103 | TG(56:6) [NL-20:4]   | -3.58 | (-4.43--2.61) | <b>1.98E-09</b> | <b>1.28E-08</b> | -2.08 | (-3.48--0.39) | <b>1.84E-02</b> | 5.77E-02        | 3.64  | (1.29- 6.06)  | <b>2.50E-03</b> | <b>3.63E-02</b> | 4.30  | (1.39- 7.28)  | <b>3.75E-03</b> | <b>3.83E-02</b> |
| 104 | TG(56:6) [NL-22:5]   | -4.23 | (-5.02--3.33) | <b>1.07E-12</b> | <b>1.09E-11</b> | -3.05 | (-4.30--1.53) | <b>3.52E-04</b> | <b>2.21E-03</b> | 3.90  | (0.93- 6.97)  | <b>1.01E-02</b> | 6.71E-02        | 4.13  | (1.07- 7.29)  | <b>8.24E-03</b> | 6.02E-02        |
| 105 | TG(56:7) [NL-20:4]   | -4.36 | (-5.20--3.38) | <b>1.38E-11</b> | <b>1.17E-10</b> | -2.47 | (-3.86--0.76) | <b>6.63E-03</b> | <b>2.55E-02</b> | 3.96  | (0.81- 7.21)  | <b>1.35E-02</b> | 7.74E-02        | 4.93  | (1.03- 8.99)  | <b>1.32E-02</b> | 7.63E-02        |
| 106 | TG(56:7) [NL-20:5]   | -4.42 | (-5.25--3.44) | <b>7.75E-12</b> | <b>6.76E-11</b> | -2.75 | (-4.04--1.18) | <b>1.37E-03</b> | <b>6.19E-03</b> | 5.08  | (1.17- 9.15)  | <b>1.08E-02</b> | 6.76E-02        | 7.20  | (2.68-11.92)  | <b>1.74E-03</b> | <b>2.63E-02</b> |
| 107 | TG(56:7) [NL-22:5]   | -4.79 | (-5.52--3.93) | <b>8.16E-16</b> | <b>2.06E-14</b> | -3.45 | (-4.60--2.05) | <b>2.32E-05</b> | <b>2.27E-04</b> | 4.85  | (1.24- 8.58)  | <b>8.32E-03</b> | 6.05E-02        | 5.93  | (1.83-10.19)  | <b>4.51E-03</b> | <b>4.18E-02</b> |
| 108 | TG(56:7) [NL-22:6]   | -5.45 | (-6.23--4.51) | <b>3.63E-15</b> | <b>6.46E-14</b> | -4.45 | (-5.55--3.08) | <b>2.88E-07</b> | <b>5.53E-06</b> | 6.41  | (1.90-11.11)  | <b>5.16E-03</b> | <b>4.82E-02</b> | 6.57  | (1.26-12.16)  | <b>1.50E-02</b> | 8.40E-02        |
| 109 | TG(56:8) [NL-20:4]   | -3.75 | (-4.62--2.74) | <b>2.02E-09</b> | <b>1.29E-08</b> | -1.57 | (-3.00- 0.14) | 7.05E-02        | 1.72E-01        | 4.51  | (1.22- 7.90)  | <b>7.15E-03</b> | 5.62E-02        | 6.47  | (2.25-10.87)  | <b>2.61E-03</b> | <b>3.06E-02</b> |
| 110 | TG(56:8) [NL-20:5]   | -4.81 | (-5.55--3.94) | <b>2.16E-15</b> | <b>4.14E-14</b> | -3.07 | (-4.30--1.59) | <b>2.42E-04</b> | <b>1.69E-03</b> | 4.10  | (0.03- 8.35)  | <b>4.84E-02</b> | 1.98E-01        | 7.48  | (2.98-12.19)  | <b>1.11E-03</b> | <b>2.08E-02</b> |
| 111 | TG(56:8) [NL-22:6]   | -5.84 | (-6.57--4.96) | <b>2.22E-17</b> | <b>1.47E-15</b> | -4.61 | (-5.66--3.32) | <b>3.86E-08</b> | <b>1.42E-06</b> | 7.11  | (2.31-12.15)  | <b>3.57E-03</b> | <b>4.51E-02</b> | 8.30  | (3.04-13.83)  | <b>1.89E-03</b> | <b>2.63E-02</b> |
| 112 | TG(56:9) [NL-22:6]   | -5.30 | (-6.04--4.42) | <b>2.03E-16</b> | <b>8.86E-15</b> | -4.24 | (-5.30--2.94) | <b>1.95E-07</b> | <b>3.90E-06</b> | 5.85  | (1.37-10.53)  | <b>1.02E-02</b> | 6.71E-02        | 8.01  | (2.89-13.38)  | <b>2.08E-03</b> | <b>2.63E-02</b> |
| 113 | TG(58:10) [NL-22:6]  | -5.02 | (-5.75--4.16) | <b>2.94E-16</b> | <b>1.07E-14</b> | -3.63 | (-4.76--2.26) | <b>7.78E-06</b> | <b>9.11E-05</b> | 5.10  | (0.69- 9.69)  | <b>2.31E-02</b> | 1.17E-01        | 5.55  | (0.57-10.77)  | <b>2.86E-02</b> | 1.21E-01        |
| 114 | TG(58:8) [NL-22:6]   | -4.95 | (-5.76--4.00) | <b>1.12E-13</b> | <b>1.34E-12</b> | -3.76 | (-4.86--2.43) | <b>2.50E-06</b> | <b>3.64E-05</b> | 4.39  | (-0.08- 9.06) | 5.42E-02        | 2.11E-01        | 5.12  | (0.12-10.38)  | <b>4.49E-02</b> | 1.62E-01        |
| 115 | TG(58:9) [NL-22:6]   | -5.22 | (-5.96--4.33) | <b>4.35E-16</b> | <b>1.33E-14</b> | -4.05 | (-5.11--2.76) | <b>3.75E-07</b> | <b>6.67E-06</b> | 3.42  | (-0.99- 8.03) | 1.29E-01        | 3.47E-01        | 6.25  | (1.09-11.68)  | <b>1.73E-02</b> | 9.33E-02        |
| 116 | TG(O-50:1) [NL-16:0] | -0.91 | (-1.82- 0.11) | 7.75E-02        | 1.42E-01        | -0.15 | (-1.24- 1.08) | 8.04E-01        | 9.14E-01        | 1.93  | (-0.91- 4.85) | 1.83E-01        | 4.24E-01        | 2.23  | (-1.09- 5.66) | 1.89E-01        | 3.72E-01        |
| 117 | TG(O-50:1) [NL-17:1] | -2.62 | (-3.44--1.70) | <b>5.75E-07</b> | <b>2.44E-06</b> | -1.48 | (-2.61--0.18) | <b>2.71E-02</b> | 7.78E-02        | 4.94  | (1.86- 8.11)  | <b>1.64E-03</b> | <b>2.81E-02</b> | 5.04  | (0.70- 9.57)  | <b>2.28E-02</b> | 1.11E-01        |
| 118 | TG(O-50:1) [NL-18:1] | -1.31 | (-2.20--0.31) | <b>1.16E-02</b> | <b>2.57E-02</b> | -0.47 | (-1.58- 0.78) | 4.41E-01        | 6.29E-01        | 3.27  | (0.25- 6.37)  | <b>3.36E-02</b> | 1.52E-01        | 2.73  | (-1.04- 6.65) | 1.57E-01        | 3.40E-01        |
| 119 | TG(O-50:2) [NL-18:2] | -0.54 | (-1.53- 0.56) | 3.20E-01        | 4.52E-01        | -0.24 | (-1.39- 1.07) | 7.04E-01        | 8.47E-01        | 3.60  | (0.90- 6.36)  | <b>8.82E-03</b> | 6.32E-02        | 2.19  | (-1.06- 5.55) | 1.86E-01        | 3.70E-01        |
| 120 | TG(O-52:2) [NL-16:0] | -1.09 | (-2.30- 0.31) | 1.20E-01        | 2.02E-01        | -1.08 | (-2.40- 0.48) | 1.64E-01        | 3.31E-01        | 4.14  | (0.42- 8.00)  | <b>2.91E-02</b> | 1.40E-01        | 1.81  | (-2.69- 6.51) | 4.35E-01        | 6.16E-01        |
| 121 | TG(O-52:2) [NL-17:1] | -3.15 | (-3.95--2.26) | <b>3.90E-09</b> | <b>2.37E-08</b> | -2.42 | (-3.49--1.17) | <b>4.01E-04</b> | <b>2.41E-03</b> | 4.41  | (1.03- 7.90)  | <b>1.05E-02</b> | 6.73E-02        | 5.69  | (1.18-10.39)  | <b>1.32E-02</b> | 7.63E-02        |
| 122 | TG(O-52:2) [NL-18:1] | -1.39 | (-2.63- 0.06) | 5.90E-02        | 1.12E-01        | -2.16 | (-3.40--0.70) | <b>5.47E-03</b> | <b>2.17E-02</b> | 5.31  | (1.22- 9.58)  | <b>1.09E-02</b> | 6.76E-02        | 4.33  | (-0.27- 9.15) | 6.54E-02        | 1.93E-01        |
| 123 | TG(O-54:2) [NL-18:1] | -2.88 | (-3.68--1.99) | <b>3.31E-08</b> | <b>1.71E-07</b> | -2.28 | (-3.35--1.03) | <b>7.73E-04</b> | <b>3.99E-03</b> | 1.34  | (-1.63- 4.40) | 3.79E-01        | 6.53E-01        | 2.58  | (-1.17- 6.48) | 1.79E-01        | 3.65E-01        |
| 124 | TG(O-54:4) [NL-17:1] | -4.46 | (-5.28--3.50) | <b>2.66E-12</b> | <b>2.51E-11</b> | -3.21 | (-4.43--1.71) | <b>1.55E-04</b> | <b>1.18E-03</b> | 2.45  | (-1.04- 6.06) | 1.69E-01        | 4.07E-01        | 3.54  | (-0.34- 7.58) | 7.38E-02        | 2.11E-01        |
| 125 | TG(O-54:4) [NL-18:2] | -5.23 | (-5.97--4.34) | <b>4.44E-16</b> | <b>1.33E-14</b> | -3.45 | (-4.69--1.92) | <b>9.27E-05</b> | <b>7.54E-04</b> | 2.63  | (-1.04- 6.44) | 1.61E-01        | 3.95E-01        | 2.86  | (-1.47- 7.39) | 1.97E-01        | 3.82E-01        |
| 126 | dhCer(d18:0/22:0)    | 0.02  | (-0.87- 1.00) | 9.65E-01        | 9.88E-01        | -0.15 | (-1.17- 0.99) | 7.89E-01        | 9.01E-01        | 1.33  | (-1.12- 3.85) | 2.87E-01        | 5.55E-01        | 1.21  | (-1.38- 3.86) | 3.60E-01        | 5.57E-01        |
| 127 | dhCer(d18:0/24:0)    | -0.64 | (-1.46- 0.27) | 1.63E-01        | 2.64E-01        | -0.26 | (-1.36- 0.98) | 6.69E-01        | 8.33E-01        | 0.07  | (-2.14- 2.33) | 9.50E-01        | 9.83E-01        | -0.13 | (-2.50- 2.29) | 9.13E-01        | 9.74E-01        |
| 128 | dhCer(d18:0/24:1)    | 0.39  | (-0.80- 1.73) | 5.33E-01        | 6.57E-01        | -0.93 | (-2.05- 0.35) | 1.48E-01        | 3.06E-01        | 1.80  | (-0.84- 4.51) | 1.82E-01        | 4.24E-01        | 1.38  | (-1.82- 4.67) | 4.00E-01        | 5.90E-01        |
| 129 | Cer(d16:1/22:0)      | -1.09 | (-1.99--0.09) | <b>3.43E-02</b> | 6.86E-02        | -0.93 | (-2.09- 0.40) | 1.61E-01        | 3.27E-01        | 1.94  | (-0.68- 4.63) | 1.46E-01        | 3.64E-01        | 3.14  | (0.04- 6.34)  | <b>4.68E-02</b> | 1.67E-01        |
| 130 | Cer(d16:1/23:0)      | -0.97 | (-2.54- 0.93) | 2.96E-01        | 4.29E-01        | -1.00 | (-2.68- 1.06) | 3.14E-01        | 5.08E-01        | 1.84  | (-1.15- 4.91) | 2.29E-01        | 4.78E-01        | 3.13  | (-0.35- 6.73) | 7.82E-02        | 2.18E-01        |
| 131 | Cer(d16:1/24:0)      | -0.99 | (-1.94- 0.07) | 6.68E-02        | 1.23E-01        | -0.55 | (-1.64- 0.67) | 3.60E-01        | 5.61E-01        | 1.20  | (-1.61- 4.08) | 4.04E-01        | 6.75E-01        | 3.27  | (0.08- 6.55)  | <b>4.43E-02</b> | 1.62E-01        |

|     |                     |       |               |                 |                 |       |               |                 |                 |       |               |                 |          |       |               |                 |                 |
|-----|---------------------|-------|---------------|-----------------|-----------------|-------|---------------|-----------------|-----------------|-------|---------------|-----------------|----------|-------|---------------|-----------------|-----------------|
| 132 | Cer(d16:1/24:1)     | -0.69 | (-1.81- 0.58) | 2.72E-01        | 4.00E-01        | -0.12 | (-1.50- 1.48) | 8.74E-01        | 9.49E-01        | 1.16  | (-1.12- 3.50) | 3.18E-01        | 5.94E-01 | 3.31  | (0.23- 6.48)  | <b>3.49E-02</b> | 1.37E-01        |
| 133 | Cer(d17:1/22:0)     | -0.81 | (-2.00- 0.56) | 2.33E-01        | 3.51E-01        | -0.84 | (-2.19- 0.74) | 2.77E-01        | 4.73E-01        | 0.81  | (-1.73- 3.42) | 5.32E-01        | 7.65E-01 | 1.34  | (-1.57- 4.33) | 3.68E-01        | 5.64E-01        |
| 134 | Cer(d17:1/23:0)     | -1.93 | (-3.39--0.16) | <b>3.39E-02</b> | 6.81E-02        | -0.26 | (-2.64- 2.89) | 8.52E-01        | 9.38E-01        | 1.79  | (-1.17- 4.84) | 2.37E-01        | 4.91E-01 | 2.09  | (-1.37- 5.66) | 2.37E-01        | 4.31E-01        |
| 135 | Cer(d17:1/24:0)     | -1.25 | (-2.17--0.23) | <b>1.80E-02</b> | <b>3.85E-02</b> | -0.76 | (-1.90- 0.54) | 2.40E-01        | 4.30E-01        | 0.35  | (-2.27- 3.03) | 7.96E-01        | 9.16E-01 | -0.11 | (-2.85- 2.70) | 9.35E-01        | 9.75E-01        |
| 136 | Cer(d17:1/24:1)     | -1.39 | (-2.39--0.25) | <b>1.80E-02</b> | <b>3.85E-02</b> | -0.09 | (-1.43- 1.46) | 9.03E-01        | 9.63E-01        | 1.34  | (-1.18- 3.92) | 3.00E-01        | 5.71E-01 | 0.84  | (-2.17- 3.95) | 5.84E-01        | 7.50E-01        |
| 137 | Cer(d18:1/16:0)     | -0.44 | (-1.18- 0.36) | 2.71E-01        | 3.99E-01        | -0.54 | (-1.45- 0.47) | 2.81E-01        | 4.75E-01        | -0.57 | (-2.30- 1.18) | 5.17E-01        | 7.51E-01 | -0.07 | (-2.07- 1.97) | 9.45E-01        | 9.75E-01        |
| 138 | Cer(d18:1/18:0)     | -0.77 | (-1.59- 0.14) | 9.51E-02        | 1.69E-01        | -0.64 | (-1.70- 0.54) | 2.73E-01        | 4.70E-01        | 1.53  | (-0.75- 3.85) | 1.88E-01        | 4.29E-01 | 2.70  | (-0.06- 5.53) | 5.50E-02        | 1.77E-01        |
| 139 | Cer(d18:1/20:0)     | -0.75 | (-1.57- 0.14) | 9.73E-02        | 1.72E-01        | -0.73 | (-1.72- 0.37) | 1.83E-01        | 3.55E-01        | 1.44  | (-0.66- 3.58) | 1.79E-01        | 4.20E-01 | 0.36  | (-2.00- 2.78) | 7.67E-01        | 8.89E-01        |
| 140 | Cer(d18:1/22:0)     | -0.33 | (-1.07- 0.49) | 4.19E-01        | 5.53E-01        | 0.31  | (-0.67- 1.40) | 5.47E-01        | 7.34E-01        | 1.19  | (-0.79- 3.21) | 2.38E-01        | 4.91E-01 | 0.69  | (-1.37- 2.80) | 5.11E-01        | 6.95E-01        |
| 141 | Cer(d18:1/23:0)     | -0.69 | (-1.59- 0.30) | 1.63E-01        | 2.64E-01        | 0.13  | (-1.16- 1.61) | 8.51E-01        | 9.38E-01        | 0.86  | (-1.19- 2.95) | 4.11E-01        | 6.75E-01 | 1.89  | (-0.27- 4.09) | 8.62E-02        | 2.35E-01        |
| 142 | Cer(d18:1/24:0)     | -0.72 | (-1.46- 0.09) | 7.91E-02        | 1.43E-01        | 0.16  | (-0.84- 1.26) | 7.67E-01        | 8.85E-01        | 0.25  | (-1.65- 2.18) | 7.97E-01        | 9.16E-01 | 0.12  | (-1.72- 2.00) | 8.98E-01        | 9.70E-01        |
| 143 | Cer(d18:1/24:1)     | -0.42 | (-1.22- 0.46) | 3.41E-01        | 4.71E-01        | -0.10 | (-1.17- 1.09) | 8.57E-01        | 9.41E-01        | 1.32  | (-0.57- 3.25) | 1.72E-01        | 4.11E-01 | -0.14 | (-2.18- 1.95) | 8.97E-01        | 9.70E-01        |
| 144 | Cer(d18:2/16:0)     | -0.65 | (-1.77- 0.63) | 3.06E-01        | 4.40E-01        | 1.39  | (-0.18- 3.22) | 8.54E-02        | 1.96E-01        | 0.26  | (-2.08- 2.66) | 8.28E-01        | 9.33E-01 | 1.02  | (-1.93- 4.07) | 4.98E-01        | 6.83E-01        |
| 145 | Cer(d18:2/22:0)     | -0.81 | (-1.69- 0.17) | 1.01E-01        | 1.75E-01        | 0.56  | (-0.60- 1.86) | 3.58E-01        | 5.60E-01        | 0.29  | (-1.78- 2.39) | 7.86E-01        | 9.16E-01 | 0.85  | (-1.81- 3.58) | 5.33E-01        | 7.11E-01        |
| 146 | Cer(d18:2/23:0)     | -0.88 | (-2.01- 0.41) | 1.70E-01        | 2.72E-01        | 0.56  | (-1.06- 2.47) | 5.20E-01        | 7.08E-01        | 0.99  | (-1.30- 3.32) | 3.98E-01        | 6.68E-01 | 1.80  | (-0.89- 4.57) | 1.90E-01        | 3.72E-01        |
| 147 | Cer(d18:2/24:0)     | -0.98 | (-1.86--0.00) | <b>4.96E-02</b> | 9.48E-02        | -0.45 | (-1.55- 0.79) | 4.58E-01        | 6.47E-01        | -0.88 | (-2.89- 1.17) | 3.97E-01        | 6.68E-01 | 0.09  | (-2.34- 2.58) | 9.40E-01        | 9.75E-01        |
| 148 | Cer(d18:2/24:1)     | 0.03  | (-0.91- 1.07) | 9.55E-01        | 9.79E-01        | 0.03  | (-1.14- 1.35) | 9.64E-01        | 9.86E-01        | 0.50  | (-1.53- 2.57) | 6.31E-01        | 8.42E-01 | 0.92  | (-1.53- 3.43) | 4.63E-01        | 6.46E-01        |
| 149 | Cer(d19:1/24:0)     | -0.93 | (-2.01- 0.30) | 1.33E-01        | 2.22E-01        | -1.46 | (-2.65--0.06) | <b>4.13E-02</b> | 1.14E-01        | 0.49  | (-3.24- 4.36) | 7.99E-01        | 9.16E-01 | -0.26 | (-4.45- 4.12) | 9.05E-01        | 9.71E-01        |
| 150 | Cer(d19:1/24:1)     | -0.55 | (-1.88- 1.01) | 4.67E-01        | 5.93E-01        | -2.07 | (-3.42--0.45) | <b>1.49E-02</b> | <b>4.87E-02</b> | 1.52  | (-2.52- 5.72) | 4.65E-01        | 7.18E-01 | 0.78  | (-4.13- 5.94) | 7.59E-01        | 8.85E-01        |
| 151 | Cer(m18:0/22:0)     | -0.67 | (-1.89- 0.74) | 3.33E-01        | 4.65E-01        | -1.77 | (-3.11--0.16) | <b>3.30E-02</b> | 9.22E-02        | 1.99  | (-0.60- 4.65) | 1.32E-01        | 3.48E-01 | 3.74  | (0.81- 6.75)  | <b>1.24E-02</b> | 7.46E-02        |
| 152 | Cer(m18:0/23:0)     | -3.06 | (-4.80--0.73) | <b>1.34E-02</b> | <b>2.97E-02</b> | 1.54  | (-1.71- 6.07) | 3.94E-01        | 5.91E-01        | 2.29  | (-0.70- 5.38) | 1.34E-01        | 3.48E-01 | 3.57  | (-0.39- 7.68) | 7.77E-02        | 2.18E-01        |
| 153 | Cer(m18:0/24:0)     | -1.48 | (-2.39--0.46) | <b>5.63E-03</b> | <b>1.38E-02</b> | -0.56 | (-1.79- 0.87) | 4.22E-01        | 6.18E-01        | 2.03  | (-0.41- 4.53) | 1.03E-01        | 2.93E-01 | 2.54  | (-0.33- 5.50) | 8.29E-02        | 2.28E-01        |
| 154 | Cer(m18:0/24:1)     | -1.01 | (-2.26- 0.45) | 1.64E-01        | 2.64E-01        | -2.11 | (-3.51--0.40) | <b>1.82E-02</b> | 5.75E-02        | 3.88  | (0.85- 7.01)  | <b>1.20E-02</b> | 7.12E-02 | 5.40  | (2.05- 8.86)  | <b>1.59E-03</b> | <b>2.62E-02</b> |
| 155 | Cer(m18:1/22:0)     | -2.74 | (-3.55--1.84) | <b>1.44E-07</b> | <b>6.76E-07</b> | -2.05 | (-3.15--0.77) | <b>2.79E-03</b> | <b>1.16E-02</b> | 0.15  | (-2.59- 2.96) | 9.16E-01        | 9.69E-01 | 3.27  | (-0.61- 7.30) | 9.93E-02        | 2.58E-01        |
| 156 | Cer(m18:1/23:0)     | -3.02 | (-4.50--1.15) | <b>3.15E-03</b> | <b>8.17E-03</b> | -3.90 | (-5.70--1.34) | <b>5.88E-03</b> | <b>2.30E-02</b> | 2.36  | (-0.98- 5.81) | 1.67E-01        | 4.06E-01 | 1.68  | (-2.29- 5.82) | 4.09E-01        | 5.97E-01        |
| 157 | Cer(m18:1/24:0)     | -2.64 | (-3.45--1.74) | <b>3.32E-07</b> | <b>1.48E-06</b> | -2.36 | (-3.41--1.14) | <b>4.08E-04</b> | <b>2.42E-03</b> | -0.49 | (-3.07- 2.17) | 7.14E-01        | 8.85E-01 | 1.01  | (-2.29- 4.43) | 5.50E-01        | 7.24E-01        |
| 158 | Cer(m18:1/24:1)     | -1.76 | (-2.83--0.52) | <b>6.74E-03</b> | <b>1.62E-02</b> | -2.53 | (-3.57--1.31) | <b>1.76E-04</b> | <b>1.31E-03</b> | 0.60  | (-2.10- 3.38) | 6.63E-01        | 8.54E-01 | 3.93  | (0.25- 7.74)  | <b>3.63E-02</b> | 1.40E-01        |
| 159 | GM3(d18:1/18:0)     | -0.87 | (-1.62--0.06) | <b>3.50E-02</b> | 6.96E-02        | -0.55 | (-1.50- 0.50) | 2.92E-01        | 4.89E-01        | -0.52 | (-2.29- 1.28) | 5.66E-01        | 7.93E-01 | -2.21 | (-4.46- 0.10) | 6.06E-02        | 1.88E-01        |
| 160 | GM3(d18:1/22:0)     | -0.04 | (-1.21- 1.29) | 9.51E-01        | 9.77E-01        | 0.35  | (-1.27- 2.26) | 6.93E-01        | 8.47E-01        | -0.44 | (-2.44- 1.60) | 6.69E-01        | 8.54E-01 | -0.29 | (-2.92- 2.41) | 8.30E-01        | 9.23E-01        |
| 161 | GM3(d18:1/24:0)     | -0.66 | (-1.64- 0.44) | 2.28E-01        | 3.47E-01        | -0.16 | (-1.35- 1.20) | 8.09E-01        | 9.16E-01        | -2.09 | (-3.98--0.17) | <b>3.36E-02</b> | 1.52E-01 | -2.80 | (-5.04--0.50) | <b>1.76E-02</b> | 9.38E-02        |
| 162 | GM3(d18:1/24:1)     | -0.02 | (-1.04- 1.13) | 9.75E-01        | 9.89E-01        | -0.14 | (-1.40- 1.30) | 8.41E-01        | 9.33E-01        | -1.02 | (-2.87- 0.87) | 2.87E-01        | 5.55E-01 | -2.51 | (-4.97- 0.01) | 5.06E-02        | 1.71E-01        |
| 163 | HexCer(d16:1/22:0)  | -0.85 | (-2.39- 0.99) | 3.41E-01        | 4.71E-01        | -0.92 | (-2.88- 1.59) | 4.37E-01        | 6.27E-01        | -0.57 | (-3.29- 2.23) | 6.85E-01        | 8.62E-01 | -0.95 | (-3.91- 2.11) | 5.37E-01        | 7.12E-01        |
| 164 | HexCer(d16:1/24:0)  | -0.91 | (-2.25- 0.66) | 2.40E-01        | 3.60E-01        | -0.76 | (-2.59- 1.53) | 4.84E-01        | 6.67E-01        | 0.97  | (-1.90- 3.91) | 5.11E-01        | 7.47E-01 | -0.57 | (-3.45- 2.41) | 7.04E-01        | 8.48E-01        |
| 165 | HexCer(d18:1/16:0)  | 0.24  | (-0.82- 1.43) | 6.66E-01        | 7.48E-01        | -0.25 | (-1.48- 1.15) | 7.06E-01        | 8.47E-01        | -0.79 | (-2.70- 1.17) | 4.26E-01        | 6.81E-01 | -2.68 | (-4.63--0.68) | <b>9.26E-03</b> | 6.64E-02        |
| 166 | HexCer(d18:1/18:0)  | -0.03 | (-1.30- 1.43) | 9.71E-01        | 9.89E-01        | 0.61  | (-1.01- 2.53) | 4.82E-01        | 6.66E-01        | -1.68 | (-3.97- 0.67) | 1.58E-01        | 3.89E-01 | -1.86 | (-4.53- 0.89) | 1.83E-01        | 3.70E-01        |
| 167 | HexCer(d18:1/20:0)  | -0.11 | (-1.28- 1.23) | 8.67E-01        | 9.19E-01        | 0.21  | (-1.24- 1.90) | 7.93E-01        | 9.04E-01        | -1.76 | (-4.03- 0.56) | 1.34E-01        | 3.48E-01 | -3.20 | (-5.58--0.76) | <b>1.08E-02</b> | 6.90E-02        |
| 168 | HexCer(d18:1/22:0)  | 0.30  | (-0.68- 1.38) | 5.64E-01        | 6.80E-01        | 0.84  | (-0.34- 2.16) | 1.71E-01        | 3.39E-01        | -1.61 | (-3.63- 0.44) | 1.23E-01        | 3.33E-01 | -3.03 | (-5.05--0.96) | <b>4.64E-03</b> | <b>4.18E-02</b> |
| 169 | HexCer(d18:1/24:0)  | 0.22  | (-0.78- 1.32) | 6.80E-01        | 7.61E-01        | -0.07 | (-1.18- 1.18) | 9.11E-01        | 9.69E-01        | -0.95 | (-2.87- 1.00) | 3.34E-01        | 6.14E-01 | -2.91 | (-5.07--0.70) | <b>1.06E-02</b> | 6.90E-02        |
| 170 | HexCer(d18:1/24:1)  | 0.81  | (-0.21- 1.94) | 1.22E-01        | 2.06E-01        | 0.21  | (-0.92- 1.48) | 7.26E-01        | 8.57E-01        | -0.23 | (-2.22- 1.80) | 8.23E-01        | 9.32E-01 | -2.92 | (-5.12--0.66) | <b>1.18E-02</b> | 7.38E-02        |
| 171 | Hex2Cer(d16:1/16:0) | -1.29 | (-2.52- 0.13) | 7.36E-02        | 1.35E-01        | -0.64 | (-2.19- 1.22) | 4.72E-01        | 6.59E-01        | 2.53  | (-0.25- 5.39) | 7.44E-02        | 2.45E-01 | 2.38  | (-1.06- 5.93) | 1.75E-01        | 3.60E-01        |
| 172 | Hex2Cer(d18:1/16:0) | -0.46 | (-1.32- 0.49) | 3.33E-01        | 4.65E-01        | -0.50 | (-1.58- 0.71) | 3.99E-01        | 5.96E-01        | -0.92 | (-3.16- 1.37) | 4.25E-01        | 6.81E-01 | -1.58 | (-4.25- 1.16) | 2.54E-01        | 4.44E-01        |
| 173 | Hex2Cer(d18:1/22:0) | -0.10 | (-1.22- 1.18) | 8.76E-01        | 9.20E-01        | -0.27 | (-1.55- 1.20) | 7.03E-01        | 8.47E-01        | -2.30 | (-4.36--0.19) | <b>3.26E-02</b> | 1.52E-01 | -2.58 | (-5.23- 0.15) | 6.38E-02        | 1.90E-01        |
| 174 | Hex2Cer(d18:1/24:1) | -0.09 | (-1.11- 1.05) | 8.75E-01        | 9.20E-01        | -0.15 | (-1.36- 1.22) | 8.19E-01        | 9.20E-01        | -2.61 | (-4.86--0.32) | <b>2.59E-02</b> | 1.27E-01 | -1.91 | (-4.63- 0.88) | 1.76E-01        | 3.60E-01        |
| 175 | Hex2Cer(d18:2/16:0) | -0.69 | (-1.70- 0.44) | 2.18E-01        | 3.34E-01        | 0.03  | (-1.19- 1.43) | 9.59E-01        | 9.85E-01        | 1.38  | (-0.81- 3.62) | 2.18E-01        | 4.66E-01 | 0.15  | (-2.47- 2.85) | 9.10E-01        | 9.73E-01        |
| 176 | Hex3Cer(d18:1/16:0) | -0.37 | (-1.11- 0.44) | 3.60E-01        | 4.87E-01        | -0.54 | (-1.47- 0.49) | 2.94E-01        | 4.89E-01        | -0.68 | (-2.09- 0.76) | 3.51E-01        | 6.24E-01 | -0.66 | (-2.52- 1.24) | 4.90E-01        | 6.78E-01        |
| 177 | Hex3Cer(d18:1/22:0) | 0.32  | (-0.86- 1.65) | 6.14E-01        | 7.17E-01        | 0.05  | (-1.47- 1.84) | 9.52E-01        | 9.82E-01        | -1.58 | (-3.65- 0.54) | 1.43E-01        | 3.60E-01 | -1.47 | (-3.84- 0.95) | 2.30E-01        | 4.27E-01        |

|     |                               |       |               |                 |                 |       |               |                 |                 |       |               |                 |                 |       |               |                 |                 |
|-----|-------------------------------|-------|---------------|-----------------|-----------------|-------|---------------|-----------------|-----------------|-------|---------------|-----------------|-----------------|-------|---------------|-----------------|-----------------|
| 178 | Hex3Cer(d18:1/24:0)           | -0.65 | (-1.60- 0.41) | 2.20E-01        | 3.36E-01        | 0.07  | (-1.17- 1.48) | 9.21E-01        | 9.70E-01        | -2.36 | (-4.26--0.41) | <b>1.79E-02</b> | 9.75E-02        | -1.74 | (-3.95- 0.52) | 1.29E-01        | 3.01E-01        |
| 179 | Hex3Cer(d18:1/24:1)           | -0.48 | (-1.41- 0.55) | 3.47E-01        | 4.75E-01        | -0.50 | (-1.68- 0.86) | 4.50E-01        | 6.38E-01        | -0.34 | (-2.19- 1.54) | 7.17E-01        | 8.85E-01        | -1.89 | (-4.13- 0.39) | 1.03E-01        | 2.64E-01        |
| 180 | SM(d17:1/14:0)                | -0.65 | (-1.33- 0.08) | 7.79E-02        | 1.42E-01        | -1.33 | (-2.10--0.48) | <b>2.83E-03</b> | <b>1.17E-02</b> | 1.99  | (-0.50- 4.54) | 1.17E-01        | 3.25E-01        | 3.07  | (-0.05- 6.29) | 5.35E-02        | 1.76E-01        |
| 181 | SM(d18:0/14:0)                | 0.28  | (-0.43- 1.04) | 4.48E-01        | 5.75E-01        | -0.91 | (-1.64--0.11) | <b>2.70E-02</b> | 7.78E-02        | 1.29  | (-0.76- 3.38) | 2.18E-01        | 4.66E-01        | 2.32  | (-0.21- 4.91) | 7.26E-02        | 2.10E-01        |
| 182 | SM(d18:1/14:0)/SM(d16:1/16:0) | -0.27 | (-0.92- 0.43) | 4.36E-01        | 5.66E-01        | -0.84 | (-1.61- 0.00) | 5.12E-02        | 1.36E-01        | 1.74  | (-0.25- 3.78) | 8.64E-02        | 2.66E-01        | 2.96  | (0.46- 5.53)  | <b>2.05E-02</b> | 1.05E-01        |
| 183 | SM(d18:2/14:0)                | 0.33  | (-0.35- 1.06) | 3.50E-01        | 4.79E-01        | -0.17 | (-1.01- 0.75) | 7.02E-01        | 8.47E-01        | 5.30  | (3.41- 7.21)  | <b>6.74E-08</b> | <b>3.24E-05</b> | 8.07  | (5.72-10.47)  | <b>1.01E-10</b> | <b>4.83E-08</b> |
| 184 | SM(d17:1/16:0)                | -0.92 | (-1.54--0.24) | <b>8.73E-03</b> | <b>2.03E-02</b> | -1.01 | (-1.78--0.17) | <b>2.03E-02</b> | 6.25E-02        | -0.43 | (-2.40- 1.58) | 6.71E-01        | 8.54E-01        | -0.16 | (-2.61- 2.36) | 9.01E-01        | 9.70E-01        |
| 185 | SM(d18:1/16:0)                | -0.23 | (-0.98- 0.58) | 5.66E-01        | 6.80E-01        | -0.43 | (-1.33- 0.56) | 3.78E-01        | 5.75E-01        | -1.51 | (-3.36- 0.38) | 1.15E-01        | 3.23E-01        | -1.47 | (-3.73- 0.85) | 2.12E-01        | 4.01E-01        |
| 186 | SM(d18:2/16:0)                | 0.19  | (-0.46- 0.89) | 5.74E-01        | 6.85E-01        | 0.00  | (-0.81- 0.87) | 9.97E-01        | 9.99E-01        | 0.75  | (-0.62- 2.14) | 2.84E-01        | 5.53E-01        | 2.14  | (0.41- 3.90)  | <b>1.57E-02</b> | 8.55E-02        |
| 187 | SM(34:3)                      | 0.48  | (-0.25- 1.26) | 1.99E-01        | 3.12E-01        | -0.26 | (-1.10- 0.67) | 5.76E-01        | 7.52E-01        | 1.94  | (-0.06- 3.98) | 5.77E-02        | 2.17E-01        | 4.73  | (2.25- 7.28)  | <b>2.10E-04</b> | <b>8.39E-03</b> |
| 188 | SM(d18:2/17:0)                | -0.74 | (-1.40--0.04) | <b>3.75E-02</b> | 7.37E-02        | -1.05 | (-1.83--0.21) | <b>1.60E-02</b> | 5.15E-02        | 0.98  | (-0.78- 2.78) | 2.76E-01        | 5.46E-01        | 1.61  | (-0.69- 3.97) | 1.69E-01        | 3.54E-01        |
| 189 | SM(35:2) (b)                  | -0.24 | (-1.22- 0.85) | 6.50E-01        | 7.36E-01        | -1.13 | (-2.18- 0.06) | 6.18E-02        | 1.56E-01        | -1.15 | (-3.40- 1.15) | 3.21E-01        | 5.98E-01        | -0.73 | (-3.52- 2.14) | 6.13E-01        | 7.74E-01        |
| 190 | SM(d18:1/18:0)/SM(d16:1/20:0) | -0.21 | (-0.94- 0.58) | 5.87E-01        | 6.98E-01        | 0.20  | (-0.73- 1.23) | 6.83E-01        | 8.39E-01        | 0.13  | (-1.70- 1.99) | 8.93E-01        | 9.59E-01        | 0.94  | (-1.33- 3.26) | 4.19E-01        | 6.04E-01        |
| 191 | SM(d18:2/18:1)                | 0.37  | (-0.40- 1.19) | 3.56E-01        | 4.85E-01        | -0.44 | (-1.33- 0.54) | 3.66E-01        | 5.68E-01        | 0.92  | (-0.67- 2.54) | 2.55E-01        | 5.14E-01        | 2.18  | (0.24- 4.16)  | <b>2.81E-02</b> | 1.19E-01        |
| 192 | SM(37:1)                      | -0.91 | (-1.71--0.04) | <b>4.10E-02</b> | 7.91E-02        | -0.63 | (-1.64- 0.49) | 2.56E-01        | 4.48E-01        | 0.13  | (-1.90- 2.20) | 9.02E-01        | 9.64E-01        | 0.37  | (-2.29- 3.10) | 7.87E-01        | 8.98E-01        |
| 193 | SM(37:2)                      | -0.70 | (-1.47- 0.14) | 9.82E-02        | 1.73E-01        | -0.74 | (-1.67- 0.30) | 1.58E-01        | 3.22E-01        | -0.55 | (-2.77- 1.72) | 6.29E-01        | 8.41E-01        | -0.33 | (-2.97- 2.39) | 8.10E-01        | 9.17E-01        |
| 194 | SM(d18:1/20:0)/SM(d16:1/22:0) | 0.06  | (-0.64- 0.80) | 8.74E-01        | 9.20E-01        | 0.62  | (-0.26- 1.58) | 1.71E-01        | 3.39E-01        | 0.37  | (-1.21- 1.98) | 6.44E-01        | 8.52E-01        | 0.99  | (-1.07- 3.09) | 3.45E-01        | 5.41E-01        |
| 195 | SM(d18:2/20:0)                | 0.26  | (-0.65- 1.26) | 5.87E-01        | 6.98E-01        | 0.45  | (-0.74- 1.80) | 4.74E-01        | 6.60E-01        | 0.22  | (-1.74- 2.22) | 8.26E-01        | 9.33E-01        | 1.04  | (-1.41- 3.55) | 4.06E-01        | 5.96E-01        |
| 196 | SM(38:3) (a)                  | -0.18 | (-0.91- 0.60) | 6.35E-01        | 7.30E-01        | -0.96 | (-1.76--0.08) | <b>3.34E-02</b> | 9.26E-02        | 1.86  | (0.24- 3.52)  | <b>2.49E-02</b> | 1.23E-01        | 2.01  | (0.01- 4.05)  | <b>4.88E-02</b> | 1.69E-01        |
| 197 | SM(38:3) (b)                  | 0.11  | (-0.83- 1.14) | 8.31E-01        | 8.90E-01        | -0.21 | (-1.28- 0.99) | 7.14E-01        | 8.47E-01        | -0.30 | (-2.65- 2.11) | 8.03E-01        | 9.16E-01        | 1.95  | (-0.75- 4.73) | 1.57E-01        | 3.40E-01        |
| 198 | SM(d16:1/23:0)/SM(d17:1/22:0) | -0.46 | (-1.12- 0.26) | 2.03E-01        | 3.16E-01        | -0.19 | (-1.02- 0.71) | 6.62E-01        | 8.28E-01        | 1.00  | (-1.03- 3.07) | 3.36E-01        | 6.14E-01        | 2.18  | (-0.31- 4.73) | 8.66E-02        | 2.35E-01        |
| 199 | SM(d18:1/22:0)/SM(d16:1/24:0) | 0.22  | (-0.51- 1.00) | 5.64E-01        | 6.80E-01        | 0.71  | (-0.20- 1.70) | 1.32E-01        | 2.79E-01        | 0.47  | (-1.22- 2.20) | 5.84E-01        | 8.05E-01        | 0.50  | (-1.47- 2.52) | 6.18E-01        | 7.76E-01        |
| 200 | SM(d16:1/24:1)                | 0.13  | (-0.66- 0.98) | 7.60E-01        | 8.22E-01        | -0.42 | (-1.32- 0.59) | 4.01E-01        | 5.96E-01        | 2.65  | (0.81- 4.53)  | <b>4.85E-03</b> | <b>4.82E-02</b> | 2.77  | (0.21- 5.39)  | <b>3.39E-02</b> | 1.35E-01        |
| 201 | SM(d18:2/22:0)                | 0.08  | (-0.66- 0.87) | 8.37E-01        | 8.90E-01        | 0.91  | (-0.11- 2.04) | 8.05E-02        | 1.87E-01        | -0.02 | (-1.56- 1.54) | 9.78E-01        | 9.94E-01        | 1.34  | (-0.63- 3.35) | 1.83E-01        | 3.70E-01        |
| 202 | SM(40:3) (a)                  | -0.26 | (-1.01- 0.56) | 5.27E-01        | 6.50E-01        | -0.61 | (-1.49- 0.36) | 2.06E-01        | 3.88E-01        | 1.80  | (0.02- 3.60)  | <b>4.73E-02</b> | 1.97E-01        | 1.75  | (-0.50- 4.05) | 1.26E-01        | 2.98E-01        |
| 203 | SM(40:3) (b)                  | -0.72 | (-1.50- 0.12) | 9.23E-02        | 1.65E-01        | -0.99 | (-1.97- 0.10) | 7.25E-02        | 1.74E-01        | 0.58  | (-1.73- 2.95) | 6.23E-01        | 8.38E-01        | 1.69  | (-1.18- 4.63) | 2.49E-01        | 4.40E-01        |
| 204 | SM(41:0)                      | -0.29 | (-1.44- 1.02) | 6.51E-01        | 7.36E-01        | -0.66 | (-1.99- 0.90) | 3.87E-01        | 5.82E-01        | 0.08  | (-1.58- 1.76) | 9.27E-01        | 9.71E-01        | 1.03  | (-0.99- 3.08) | 3.18E-01        | 5.17E-01        |
| 205 | SM(41:1)                      | -0.33 | (-1.14- 0.56) | 4.52E-01        | 5.78E-01        | 0.08  | (-0.95- 1.23) | 8.82E-01        | 9.56E-01        | 0.36  | (-1.33- 2.08) | 6.74E-01        | 8.56E-01        | 0.83  | (-1.16- 2.85) | 4.15E-01        | 6.02E-01        |
| 206 | SM(d17:1/24:1)                | -0.21 | (-0.92- 0.54) | 5.67E-01        | 6.80E-01        | -0.74 | (-1.58- 0.19) | 1.14E-01        | 2.46E-01        | 0.68  | (-1.01- 2.40) | 4.31E-01        | 6.87E-01        | 0.56  | (-1.67- 2.84) | 6.24E-01        | 7.82E-01        |
| 207 | SM(d18:2/23:0)                | -0.18 | (-1.01- 0.73) | 6.93E-01        | 7.70E-01        | 0.34  | (-0.76- 1.58) | 5.55E-01        | 7.37E-01        | 0.38  | (-1.20- 1.97) | 6.40E-01        | 8.51E-01        | 1.43  | (-0.56- 3.45) | 1.59E-01        | 3.41E-01        |
| 208 | SM(d18:1/24:0)                | -0.43 | (-1.12- 0.32) | 2.55E-01        | 3.81E-01        | 0.15  | (-0.79- 1.19) | 7.63E-01        | 8.85E-01        | -0.52 | (-2.00- 0.99) | 4.96E-01        | 7.35E-01        | -0.33 | (-2.11- 1.48) | 7.15E-01        | 8.49E-01        |
| 209 | SM(d18:1/24:1)                | 0.49  | (-0.30- 1.35) | 2.29E-01        | 3.48E-01        | -0.14 | (-1.03- 0.82) | 7.61E-01        | 8.85E-01        | 0.19  | (-1.56- 1.97) | 8.32E-01        | 9.35E-01        | -0.55 | (-2.58- 1.52) | 5.97E-01        | 7.62E-01        |
| 210 | SM(d18:2/24:0)                | -0.39 | (-1.07- 0.34) | 2.84E-01        | 4.15E-01        | 0.39  | (-0.55- 1.42) | 4.26E-01        | 6.21E-01        | -0.61 | (-1.92- 0.72) | 3.68E-01        | 6.37E-01        | -0.11 | (-1.83- 1.64) | 9.00E-01        | 9.70E-01        |
| 211 | SM(43:1)                      | -0.63 | (-1.58- 0.43) | 2.32E-01        | 3.51E-01        | -1.42 | (-2.48--0.21) | <b>2.33E-02</b> | 7.02E-02        | -1.48 | (-3.37- 0.45) | 1.31E-01        | 3.48E-01        | -1.13 | (-3.45- 1.25) | 3.48E-01        | 5.43E-01        |
| 212 | SM(44:1)                      | -0.46 | (-1.10- 0.22) | 1.78E-01        | 2.83E-01        | -0.37 | (-1.19- 0.53) | 4.11E-01        | 6.07E-01        | -2.46 | (-3.86--1.04) | <b>8.52E-04</b> | <b>2.04E-02</b> | -1.52 | (-3.23- 0.23) | 8.83E-02        | 2.37E-01        |
| 213 | SM(44:2)                      | -0.01 | (-0.68- 0.72) | 9.84E-01        | 9.92E-01        | -0.42 | (-1.25- 0.48) | 3.42E-01        | 5.43E-01        | -1.16 | (-2.80- 0.50) | 1.69E-01        | 4.07E-01        | -1.20 | (-3.16- 0.80) | 2.36E-01        | 4.31E-01        |
| 214 | SM(44:3) (a)                  | -0.37 | (-1.00- 0.30) | 2.67E-01        | 3.95E-01        | -0.38 | (-1.16- 0.48) | 3.75E-01        | 5.75E-01        | -0.41 | (-1.83- 1.02) | 5.69E-01        | 7.94E-01        | -0.71 | (-2.52- 1.13) | 4.46E-01        | 6.28E-01        |
| 215 | LPC(14:0) [sn2]               | 2.00  | (1.33- 2.71)  | <b>1.28E-09</b> | <b>8.39E-09</b> | 1.49  | (0.75- 2.28)  | <b>5.65E-05</b> | <b>4.76E-04</b> | 4.13  | (1.16- 7.19)  | <b>6.34E-03</b> | 5.25E-02        | 6.01  | (1.90-10.30)  | <b>4.15E-03</b> | <b>4.07E-02</b> |
| 216 | LPC(14:0) [sn1]               | 1.76  | (1.12- 2.43)  | <b>2.26E-08</b> | <b>1.23E-07</b> | 1.49  | (0.76- 2.27)  | <b>4.09E-05</b> | <b>3.65E-04</b> | 3.98  | (1.07- 6.96)  | <b>7.29E-03</b> | 5.64E-02        | 5.83  | (1.87- 9.93)  | <b>3.84E-03</b> | <b>3.84E-02</b> |
| 217 | LPC(15:0) [sn2]               | 1.45  | (0.66- 2.30)  | <b>2.29E-04</b> | <b>7.18E-04</b> | 0.60  | (-0.26- 1.53) | 1.75E-01        | 3.44E-01        | 0.77  | (-2.04- 3.65) | 5.95E-01        | 8.10E-01        | 3.15  | (-0.54- 6.98) | 9.44E-02        | 2.49E-01        |
| 218 | LPC(15:0) [sn1]               | 0.93  | (0.23- 1.69)  | <b>8.96E-03</b> | <b>2.07E-02</b> | 0.67  | (-0.13- 1.53) | 1.01E-01        | 2.26E-01        | 0.40  | (-2.22- 3.08) | 7.69E-01        | 9.12E-01        | 2.66  | (-0.77- 6.21) | 1.29E-01        | 3.01E-01        |
| 219 | LPC(16:0) [sn2]               | 1.54  | (0.94- 2.17)  | <b>1.98E-07</b> | <b>9.14E-07</b> | 2.07  | (1.31- 2.88)  | <b>2.86E-08</b> | <b>1.15E-06</b> | -0.59 | (-2.69- 1.54) | 5.82E-01        | 8.05E-01        | 2.50  | (-0.13- 5.20) | 6.20E-02        | 1.88E-01        |
| 220 | LPC(16:0) [sn1]               | 1.85  | (1.12- 2.64)  | <b>3.00E-07</b> | <b>1.36E-06</b> | 2.15  | (1.25- 3.13)  | <b>1.15E-06</b> | <b>1.79E-05</b> | -0.69 | (-3.16- 1.83) | 5.85E-01        | 8.05E-01        | 2.18  | (-0.81- 5.25) | 1.53E-01        | 3.40E-01        |
| 221 | LPC(16:1) [sn2]               | 4.38  | (3.37- 5.47)  | <b>4.90E-20</b> | <b>1.18E-17</b> | 3.52  | (2.46- 4.66)  | <b>2.65E-12</b> | <b>1.27E-09</b> | 4.20  | (1.71- 6.76)  | <b>9.57E-04</b> | <b>2.14E-02</b> | 6.65  | (3.67- 9.72)  | <b>1.49E-05</b> | <b>1.53E-03</b> |
| 222 | LPC(16:1) [sn1]               | 4.38  | (3.43- 5.40)  | <b>2.15E-22</b> | <b>1.03E-19</b> | 3.29  | (2.29- 4.37)  | <b>6.50E-12</b> | <b>1.56E-09</b> | 3.09  | (0.68- 5.56)  | <b>1.19E-02</b> | 7.12E-02        | 5.26  | (2.38- 8.22)  | <b>3.56E-04</b> | <b>1.14E-02</b> |
| 223 | LPC(15-MHDA) [sn2]            | 1.64  | (0.37- 3.07)  | <b>1.03E-02</b> | <b>2.35E-02</b> | -0.03 | (-1.21- 1.32) | 9.65E-01        | 9.86E-01        | -1.63 | (-5.04- 1.91) | 3.61E-01        | 6.36E-01        | 1.64  | (-2.82- 6.29) | 4.75E-01        | 6.59E-01        |

|     |                                           |       |               |                 |                 |       |               |                 |                 |       |               |                 |                 |       |               |                 |                 |
|-----|-------------------------------------------|-------|---------------|-----------------|-----------------|-------|---------------|-----------------|-----------------|-------|---------------|-----------------|-----------------|-------|---------------|-----------------|-----------------|
| 224 | LPC(15-MHDA) [sn1] / LPC(17:0) [sn2]      | 0.99  | (0.04- 2.03)  | <b>4.04E-02</b> | 7.83E-02        | 0.02  | (-0.93- 1.06) | 9.72E-01        | 9.87E-01        | -2.02 | (-4.94- 0.99) | 1.85E-01        | 4.25E-01        | 0.77  | (-2.85- 4.52) | 6.80E-01        | 8.31E-01        |
| 225 | LPC(17:0) [sn1]                           | 0.13  | (-0.49- 0.79) | 6.88E-01        | 7.66E-01        | 0.34  | (-0.40- 1.14) | 3.77E-01        | 5.75E-01        | -2.13 | (-4.56- 0.35) | 9.18E-02        | 2.70E-01        | 0.61  | (-2.30- 3.60) | 6.84E-01        | 8.33E-01        |
| 226 | LPC(17:1) [sn1] (a) / LPC(17:1) [sn2] (b) | 2.44  | (1.55- 3.41)  | <b>2.06E-08</b> | <b>1.14E-07</b> | 0.87  | (-0.01- 1.82) | 5.23E-02        | 1.38E-01        | 0.00  | (-2.59- 2.66) | 9.99E-01        | 9.99E-01        | 2.13  | (-1.21- 5.59) | 2.12E-01        | 4.01E-01        |
| 227 | LPC(18:0) [sn2]                           | 0.72  | (0.16- 1.31)  | <b>1.09E-02</b> | <b>2.43E-02</b> | 1.42  | (0.64- 2.25)  | <b>2.43E-04</b> | <b>1.69E-03</b> | -0.75 | (-3.04- 1.59) | 5.25E-01        | 7.57E-01        | 2.97  | (0.20- 5.81)  | <b>3.56E-02</b> | 1.38E-01        |
| 228 | LPC(18:0) [sn1]                           | 0.81  | (0.23- 1.43)  | <b>5.76E-03</b> | <b>1.40E-02</b> | 1.29  | (0.50- 2.13)  | <b>1.03E-03</b> | <b>4.99E-03</b> | -0.72 | (-3.29- 1.92) | 5.87E-01        | 8.05E-01        | 2.97  | (-0.01- 6.04) | 5.08E-02        | 1.71E-01        |
| 229 | LPC(18:1) [sn2]                           | 3.96  | (3.00- 4.99)  | <b>4.21E-18</b> | <b>4.04E-16</b> | 3.16  | (2.16- 4.24)  | <b>4.94E-11</b> | <b>5.23E-09</b> | -1.92 | (-4.17- 0.37) | 9.93E-02        | 2.86E-01        | 0.79  | (-2.24- 3.90) | 6.13E-01        | 7.74E-01        |
| 230 | LPC(18:1) [sn1]                           | 3.71  | (2.86- 4.62)  | <b>1.22E-19</b> | <b>1.96E-17</b> | 2.91  | (2.01- 3.87)  | <b>2.21E-11</b> | <b>3.54E-09</b> | -1.93 | (-4.00- 0.19) | 7.43E-02        | 2.45E-01        | 0.02  | (-2.53- 2.65) | 9.86E-01        | 9.91E-01        |
| 231 | LPC(18:2) [sn2]                           | 2.88  | (1.95- 3.88)  | <b>1.19E-10</b> | <b>8.82E-10</b> | 2.95  | (1.85- 4.14)  | <b>2.38E-08</b> | <b>1.04E-06</b> | -1.36 | (-3.44- 0.77) | 2.09E-01        | 4.58E-01        | -0.57 | (-3.16- 2.10) | 6.71E-01        | 8.24E-01        |
| 232 | LPC(18:2) [sn1]                           | 2.93  | (1.99- 3.95)  | <b>9.62E-11</b> | <b>7.21E-10</b> | 2.87  | (1.77- 4.07)  | <b>6.68E-08</b> | <b>2.14E-06</b> | -1.55 | (-3.85- 0.81) | 1.95E-01        | 4.38E-01        | -1.69 | (-4.46- 1.16) | 2.41E-01        | 4.32E-01        |
| 233 | LPC(18:3) [sn2] (a)                       | 2.28  | (1.42- 3.20)  | <b>5.55E-08</b> | <b>2.67E-07</b> | 2.29  | (1.27- 3.40)  | <b>4.21E-06</b> | <b>5.32E-05</b> | 0.04  | (-2.69- 2.85) | 9.76E-01        | 9.94E-01        | 1.46  | (-2.11- 5.16) | 4.26E-01        | 6.08E-01        |
| 234 | LPC(18:3) [sn1] (a)/LPC(18:3) [sn2] (b)   | 4.69  | (3.44- 6.07)  | <b>7.42E-16</b> | <b>2.04E-14</b> | 4.00  | (2.66- 5.48)  | <b>2.33E-10</b> | <b>1.87E-08</b> | 0.54  | (-2.41- 3.59) | 7.20E-01        | 8.86E-01        | 2.51  | (-1.38- 6.54) | 2.07E-01        | 3.98E-01        |
| 235 | LPC(18:3) (a) [sn1] [104_sn1]             | 4.40  | (3.21- 5.70)  | <b>2.66E-15</b> | <b>4.91E-14</b> | 3.62  | (2.33- 5.04)  | <b>2.99E-09</b> | <b>1.60E-07</b> | 0.80  | (-2.16- 3.84) | 5.99E-01        | 8.11E-01        | 2.36  | (-1.54- 6.40) | 2.37E-01        | 4.31E-01        |
| 236 | LPC(19:0) [sn1] (a) / LPC(19:0) [sn2] (b) | 0.02  | (-0.83- 0.94) | 9.73E-01        | 9.89E-01        | -0.49 | (-1.41- 0.52) | 3.25E-01        | 5.20E-01        | -3.27 | (-5.49--0.99) | <b>5.33E-03</b> | <b>4.82E-02</b> | -0.95 | (-3.63- 1.80) | 4.92E-01        | 6.78E-01        |
| 237 | LPC(20:0) [sn1]                           | 0.27  | (-0.27- 0.83) | 3.36E-01        | 4.67E-01        | 0.39  | (-0.28- 1.12) | 2.61E-01        | 4.51E-01        | -4.17 | (-6.10--2.20) | <b>5.50E-05</b> | <b>4.46E-03</b> | -2.07 | (-4.53- 0.45) | 1.06E-01        | 2.68E-01        |
| 238 | LPC(20:1) [sn2]                           | 1.66  | (0.97- 2.38)  | <b>8.89E-07</b> | <b>3.74E-06</b> | 1.10  | (0.31- 1.95)  | <b>5.90E-03</b> | <b>2.30E-02</b> | -3.18 | (-5.31--1.00) | <b>4.74E-03</b> | <b>4.82E-02</b> | -0.02 | (-2.60- 2.63) | 9.88E-01        | 9.91E-01        |
| 239 | LPC(20:1) [sn1]                           | 2.06  | (1.41- 2.75)  | <b>1.46E-10</b> | <b>1.06E-09</b> | 1.32  | (0.60- 2.09)  | <b>2.38E-04</b> | <b>1.69E-03</b> | -3.45 | (-5.56--1.28) | <b>2.11E-03</b> | <b>3.27E-02</b> | -0.70 | (-3.17- 1.83) | 5.79E-01        | 7.46E-01        |
| 240 | LPC(20:2) [sn2]                           | 3.91  | (2.89- 5.02)  | <b>7.66E-16</b> | <b>2.04E-14</b> | 3.66  | (2.49- 4.95)  | <b>5.44E-11</b> | <b>5.23E-09</b> | -1.54 | (-3.61- 0.58) | 1.52E-01        | 3.75E-01        | 1.28  | (-1.25- 3.88) | 3.22E-01        | 5.19E-01        |
| 241 | LPC(20:2) [sn1]                           | 3.72  | (2.82- 4.68)  | <b>3.71E-18</b> | <b>4.04E-16</b> | 2.88  | (1.83- 4.03)  | <b>1.33E-08</b> | <b>6.37E-07</b> | -1.87 | (-3.97- 0.28) | 8.69E-02        | 2.66E-01        | 0.84  | (-1.68- 3.42) | 5.16E-01        | 6.98E-01        |
| 242 | LPC(20:3) [sn2]                           | 2.83  | (1.94- 3.80)  | <b>5.17E-11</b> | <b>4.07E-10</b> | 2.33  | (1.30- 3.47)  | <b>4.18E-06</b> | <b>5.32E-05</b> | 1.02  | (-1.28- 3.37) | 3.84E-01        | 6.55E-01        | 5.44  | (2.42- 8.55)  | <b>4.27E-04</b> | <b>1.28E-02</b> |
| 243 | LPC(20:3) [sn1]                           | 3.53  | (2.56- 4.59)  | <b>3.33E-14</b> | <b>4.32E-13</b> | 2.97  | (1.84- 4.21)  | <b>4.25E-08</b> | <b>1.46E-06</b> | 0.88  | (-1.71- 3.53) | 5.07E-01        | 7.44E-01        | 4.99  | (1.89- 8.19)  | <b>1.64E-03</b> | <b>2.62E-02</b> |
| 244 | LPC(20:3) [104_sn1]                       | 3.58  | (2.60- 4.65)  | <b>2.02E-14</b> | <b>3.01E-13</b> | 2.80  | (1.72- 3.99)  | <b>9.31E-08</b> | <b>2.74E-06</b> | 0.99  | (-1.63- 3.68) | 4.62E-01        | 7.17E-01        | 5.08  | (1.85- 8.41)  | <b>2.07E-03</b> | <b>2.63E-02</b> |
| 245 | LPC(20:4) [sn2]                           | 2.46  | (1.61- 3.37)  | <b>2.40E-09</b> | <b>1.50E-08</b> | 2.31  | (1.35- 3.35)  | <b>8.21E-07</b> | <b>1.36E-05</b> | 0.06  | (-2.09- 2.24) | 9.59E-01        | 9.88E-01        | 4.00  | (1.39- 6.67)  | <b>2.70E-03</b> | <b>3.09E-02</b> |
| 246 | LPC(20:4) [sn1]                           | 2.74  | (1.83- 3.72)  | <b>4.87E-10</b> | <b>3.39E-09</b> | 2.59  | (1.58- 3.70)  | <b>1.46E-07</b> | <b>3.50E-06</b> | 0.00  | (-2.41- 2.46) | 9.97E-01        | 9.99E-01        | 2.65  | (-0.11- 5.48) | 5.97E-02        | 1.87E-01        |
| 247 | LPC(20:5) [sn2]                           | 0.31  | (-1.09- 1.93) | 6.80E-01        | 7.61E-01        | 0.70  | (-0.99- 2.71) | 4.37E-01        | 6.27E-01        | 3.35  | (-0.26- 7.09) | 6.93E-02        | 2.38E-01        | 6.65  | (2.03-11.49)  | <b>4.73E-03</b> | <b>4.18E-02</b> |
| 248 | LPC(20:5) [sn1]                           | 0.69  | (-0.74- 2.35) | 3.63E-01        | 4.90E-01        | 0.57  | (-1.07- 2.51) | 5.17E-01        | 7.05E-01        | 3.54  | (-0.28- 7.50) | 6.95E-02        | 2.38E-01        | 6.45  | (1.75-11.36)  | <b>6.99E-03</b> | 5.51E-02        |
| 249 | LPC(22:4) [sn2]                           | 2.45  | (1.53- 3.43)  | <b>3.64E-08</b> | <b>1.86E-07</b> | 2.66  | (1.58- 3.85)  | <b>4.14E-07</b> | <b>7.09E-06</b> | -1.43 | (-3.81- 1.01) | 2.46E-01        | 5.03E-01        | 2.15  | (-0.87- 5.25) | 1.63E-01        | 3.44E-01        |
| 250 | LPC(22:4) [sn1]                           | 2.78  | (1.91- 3.70)  | <b>3.03E-11</b> | <b>2.47E-10</b> | 2.61  | (1.60- 3.72)  | <b>1.03E-07</b> | <b>2.74E-06</b> | -0.19 | (-2.72- 2.40) | 8.82E-01        | 9.49E-01        | 2.15  | (-0.85- 5.23) | 1.60E-01        | 3.41E-01        |
| 251 | LPC(22:5) [sn2] (n3)                      | 1.51  | (0.45- 2.67)  | <b>4.32E-03</b> | <b>1.09E-02</b> | 2.18  | (0.81- 3.71)  | <b>1.22E-03</b> | <b>5.68E-03</b> | -0.01 | (-2.16- 2.18) | 9.91E-01        | 9.99E-01        | 2.49  | (-0.14- 5.18) | 6.37E-02        | 1.90E-01        |
| 252 | LPC(22:5) [sn1] (n3)/LPC(22:5) [sn2] (n6) | 1.94  | (1.04- 2.92)  | <b>1.19E-05</b> | <b>4.49E-05</b> | 2.46  | (1.30- 3.73)  | <b>1.26E-05</b> | <b>1.37E-04</b> | -0.32 | (-2.56- 1.98) | 7.84E-01        | 9.16E-01        | 2.00  | (-0.65- 4.72) | 1.39E-01        | 3.14E-01        |
| 253 | LPC(22:5) [sn1] (n6)                      | 4.71  | (3.19- 6.41)  | <b>2.08E-11</b> | <b>1.72E-10</b> | 4.30  | (2.54- 6.32)  | <b>1.85E-07</b> | <b>3.86E-06</b> | -1.41 | (-4.32- 1.58) | 3.50E-01        | 6.24E-01        | 1.02  | (-2.44- 4.60) | 5.67E-01        | 7.36E-01        |
| 254 | LPC(22:5) (n3) [sn1] [104_sn1]            | 0.84  | (-0.13- 1.89) | 9.17E-02        | 1.64E-01        | 1.38  | (0.17- 2.74)  | <b>2.44E-02</b> | 7.22E-02        | 0.33  | (-1.98- 2.68) | 7.83E-01        | 9.16E-01        | 1.91  | (-0.91- 4.81) | 1.85E-01        | 3.70E-01        |
| 255 | LPC(22:6) [sn2]                           | 1.49  | (0.60- 2.45)  | <b>7.81E-04</b> | <b>2.19E-03</b> | 1.86  | (0.82- 3.00)  | <b>3.09E-04</b> | <b>2.03E-03</b> | -0.09 | (-2.54- 2.41) | 9.42E-01        | 9.79E-01        | 1.58  | (-1.47- 4.73) | 3.10E-01        | 5.08E-01        |
| 256 | LPC(22:6) [sn1]                           | 2.03  | (1.07- 3.07)  | <b>1.50E-05</b> | <b>5.60E-05</b> | 2.19  | (1.10- 3.38)  | <b>4.10E-05</b> | <b>3.65E-04</b> | 0.27  | (-2.39- 3.01) | 8.41E-01        | 9.40E-01        | 0.63  | (-2.40- 3.75) | 6.86E-01        | 8.34E-01        |
| 257 | LPC(O-16:0)                               | 1.64  | (0.97- 2.36)  | <b>8.96E-07</b> | <b>3.74E-06</b> | 1.94  | (1.17- 2.76)  | <b>3.11E-07</b> | <b>5.74E-06</b> | -0.82 | (-3.14- 1.56) | 4.94E-01        | 7.35E-01        | 2.27  | (-0.57- 5.20) | 1.18E-01        | 2.83E-01        |
| 258 | LPC(O-18:0)                               | 0.55  | (-0.23- 1.38) | 1.71E-01        | 2.74E-01        | 0.05  | (-0.77- 0.94) | 9.15E-01        | 9.70E-01        | -2.38 | (-4.94- 0.25) | 7.56E-02        | 2.45E-01        | 0.76  | (-2.38- 3.99) | 6.38E-01        | 7.96E-01        |
| 259 | LPC(O-18:1)                               | 1.90  | (1.20- 2.64)  | <b>3.74E-08</b> | <b>1.89E-07</b> | 1.74  | (0.96- 2.57)  | <b>6.71E-06</b> | <b>8.14E-05</b> | -1.36 | (-3.72- 1.05) | 2.64E-01        | 5.28E-01        | 1.34  | (-1.42- 4.18) | 3.41E-01        | 5.39E-01        |
| 260 | LPC(O-20:0)                               | 0.44  | (-0.66- 1.67) | 4.43E-01        | 5.70E-01        | -0.41 | (-1.60- 0.96) | 5.39E-01        | 7.27E-01        | -3.78 | (-6.12--1.38) | <b>2.35E-03</b> | <b>3.53E-02</b> | -0.31 | (-3.22- 2.69) | 8.39E-01        | 9.30E-01        |
| 261 | LPC(O-20:1)                               | 2.44  | (1.22- 3.79)  | <b>4.14E-05</b> | <b>1.45E-04</b> | 3.29  | (1.62- 5.21)  | <b>3.99E-05</b> | <b>3.65E-04</b> | -0.97 | (-3.77- 1.91) | 5.01E-01        | 7.38E-01        | 1.82  | (-2.15- 5.96) | 3.71E-01        | 5.66E-01        |
| 262 | LPC(O-22:0)                               | 0.23  | (-0.41- 0.91) | 4.88E-01        | 6.13E-01        | 0.22  | (-0.50- 1.00) | 5.57E-01        | 7.37E-01        | -1.81 | (-3.29--0.31) | <b>1.87E-02</b> | 1.01E-01        | -1.92 | (-3.89- 0.09) | 6.11E-02        | 1.88E-01        |
| 263 | LPC(O-22:1)                               | 1.62  | (0.86- 2.44)  | <b>1.60E-05</b> | <b>5.90E-05</b> | 0.80  | (-0.07- 1.73) | 7.14E-02        | 1.73E-01        | -2.10 | (-4.24- 0.10) | 6.10E-02        | 2.20E-01        | -1.54 | (-4.28- 1.28) | 2.80E-01        | 4.80E-01        |
| 264 | LPC(O-24:0)                               | -0.48 | (-1.17- 0.26) | 1.94E-01        | 3.06E-01        | -0.38 | (-1.13- 0.45) | 3.58E-01        | 5.60E-01        | -1.06 | (-2.58- 0.49) | 1.77E-01        | 4.20E-01        | -1.85 | (-3.86- 0.21) | 7.72E-02        | 2.18E-01        |
| 265 | LPC(O-24:1)                               | 0.86  | (0.15- 1.61)  | <b>1.61E-02</b> | <b>3.54E-02</b> | -0.04 | (-0.79- 0.78) | 9.26E-01        | 9.70E-01        | -0.68 | (-2.41- 1.09) | 4.48E-01        | 6.98E-01        | -0.18 | (-2.56- 2.26) | 8.84E-01        | 9.67E-01        |
| 266 | LPC(O-24:2)                               | 0.25  | (-0.43- 0.97) | 4.82E-01        | 6.07E-01        | 0.13  | (-0.69- 1.03) | 7.58E-01        | 8.85E-01        | -1.61 | (-3.70- 0.53) | 1.38E-01        | 3.52E-01        | -1.36 | (-4.11- 1.47) | 3.41E-01        | 5.39E-01        |
| 267 | LPC(P-16:0)                               | 1.02  | (0.39- 1.69)  | <b>1.27E-03</b> | <b>3.51E-03</b> | 1.30  | (0.55- 2.10)  | <b>5.10E-04</b> | <b>2.82E-03</b> | -0.77 | (-3.08- 1.60) | 5.20E-01        | 7.52E-01        | 2.16  | (-0.52- 4.90) | 1.14E-01        | 2.80E-01        |
| 268 | LPC(P-18:0)                               | 1.89  | (1.20- 2.63)  | <b>3.00E-08</b> | <b>1.60E-07</b> | 1.58  | (0.81- 2.39)  | <b>3.27E-05</b> | <b>3.08E-04</b> | -1.58 | (-3.89- 0.78) | 1.86E-01        | 4.25E-01        | 1.26  | (-1.51- 4.10) | 3.75E-01        | 5.66E-01        |
| 269 | LPC(P-18:1)                               | 1.24  | (0.40- 2.14)  | <b>3.19E-03</b> | <b>8.23E-03</b> | 1.39  | (0.34- 2.56)  | <b>8.86E-03</b> | <b>3.15E-02</b> | -0.72 | (-3.39- 2.02) | 6.00E-01        | 8.11E-01        | 3.19  | (-0.01- 6.49) | 5.06E-02        | 1.71E-01        |

|     |                   |       |               |                 |                 |       |               |                 |                 |       |               |                 |                 |       |               |                 |                 |
|-----|-------------------|-------|---------------|-----------------|-----------------|-------|---------------|-----------------|-----------------|-------|---------------|-----------------|-----------------|-------|---------------|-----------------|-----------------|
| 270 | LPC(P-20:0)       | 2.59  | ( 1.67- 3.57) | <b>5.48E-09</b> | <b>3.21E-08</b> | 1.26  | ( 0.33- 2.29) | <b>7.45E-03</b> | <b>2.80E-02</b> | -2.47 | (-4.95- 0.07) | 5.69E-02        | 2.17E-01        | -0.91 | (-4.05- 2.34) | 5.76E-01        | 7.45E-01        |
| 271 | LPE(16:0) [sn2]   | 1.63  | ( 0.86- 2.47) | <b>2.17E-05</b> | <b>7.90E-05</b> | 3.34  | ( 2.23- 4.55) | <b>2.77E-10</b> | <b>1.90E-08</b> | -2.11 | (-4.27- 0.11) | 6.24E-02        | 2.23E-01        | -1.46 | (-4.09- 1.23) | 2.83E-01        | 4.80E-01        |
| 272 | LPE(16:0) [sn1]   | 1.81  | ( 1.08- 2.59) | <b>4.95E-07</b> | <b>2.16E-06</b> | 3.02  | ( 1.99- 4.14) | <b>1.07E-09</b> | <b>6.42E-08</b> | -1.76 | (-3.77- 0.28) | 9.04E-02        | 2.70E-01        | -1.01 | (-3.55- 1.61) | 4.44E-01        | 6.26E-01        |
| 273 | LPE(18:0) [sn2]   | 1.12  | ( 0.47- 1.82) | <b>6.66E-04</b> | <b>1.93E-03</b> | 1.94  | ( 1.04- 2.90) | <b>1.05E-05</b> | <b>1.17E-04</b> | -1.99 | (-3.76--0.19) | <b>3.03E-02</b> | 1.43E-01        | 0.07  | (-2.43- 2.63) | 9.57E-01        | 9.75E-01        |
| 274 | LPE(18:0) [sn1]   | 1.17  | ( 0.55- 1.83) | <b>1.80E-04</b> | <b>5.75E-04</b> | 2.23  | ( 1.30- 3.23) | <b>9.65E-07</b> | <b>1.54E-05</b> | -1.75 | (-3.65- 0.18) | 7.51E-02        | 2.45E-01        | 0.39  | (-2.11- 2.96) | 7.61E-01        | 8.85E-01        |
| 275 | LPE(18:1) [sn2]   | 2.78  | ( 1.90- 3.72) | <b>5.35E-11</b> | <b>4.14E-10</b> | 2.29  | ( 1.28- 3.39) | <b>3.51E-06</b> | <b>4.67E-05</b> | -2.39 | (-4.81- 0.08) | 5.79E-02        | 2.17E-01        | 0.11  | (-3.12- 3.44) | 9.48E-01        | 9.75E-01        |
| 276 | LPE(18:1) [sn1]   | 3.45  | ( 2.51- 4.46) | <b>1.19E-14</b> | <b>1.85E-13</b> | 2.27  | ( 1.30- 3.34) | <b>1.89E-06</b> | <b>2.84E-05</b> | -1.74 | (-4.22- 0.81) | 1.77E-01        | 4.20E-01        | -0.13 | (-3.42- 3.27) | 9.40E-01        | 9.75E-01        |
| 277 | LPE(18:2) [sn2]   | 3.67  | ( 2.45- 5.01) | <b>1.97E-10</b> | <b>1.39E-09</b> | 3.61  | ( 2.16- 5.24) | <b>1.53E-07</b> | <b>3.51E-06</b> | -1.63 | (-4.13- 0.93) | 2.08E-01        | 4.58E-01        | -1.73 | (-4.83- 1.46) | 2.82E-01        | 4.80E-01        |
| 278 | LPE(18:2) [sn1]   | 3.94  | ( 2.79- 5.19) | <b>3.20E-13</b> | <b>3.65E-12</b> | 3.44  | ( 2.08- 4.96) | <b>1.00E-07</b> | <b>2.74E-06</b> | -1.56 | (-4.10- 1.05) | 2.37E-01        | 4.91E-01        | -1.71 | (-4.76- 1.45) | 2.83E-01        | 4.80E-01        |
| 279 | LPE(20:4) [sn1]   | 3.50  | ( 2.47- 4.61) | <b>6.96E-13</b> | <b>7.43E-12</b> | 2.76  | ( 1.68- 3.95) | <b>1.42E-07</b> | <b>3.50E-06</b> | -1.81 | (-3.60- 0.02) | 5.20E-02        | 2.08E-01        | -0.42 | (-2.66- 1.88) | 7.16E-01        | 8.49E-01        |
| 280 | LPE(22:6) [sn2]   | 2.13  | ( 1.18- 3.15) | <b>4.65E-06</b> | <b>1.82E-05</b> | 2.27  | ( 1.19- 3.46) | <b>1.76E-05</b> | <b>1.87E-04</b> | -0.99 | (-3.33- 1.40) | 4.11E-01        | 6.75E-01        | 0.12  | (-2.65- 2.98) | 9.32E-01        | 9.75E-01        |
| 281 | LPE(22:6) [sn1]   | 2.40  | ( 1.44- 3.44) | <b>2.49E-07</b> | <b>1.14E-06</b> | 2.46  | ( 1.38- 3.64) | <b>2.68E-06</b> | <b>3.78E-05</b> | -0.35 | (-2.65- 2.00) | 7.66E-01        | 9.12E-01        | -0.55 | (-3.14- 2.11) | 6.79E-01        | 8.31E-01        |
| 282 | PC(28:0)          | 0.04  | (-0.73- 0.87) | 9.20E-01        | 9.58E-01        | -0.63 | (-1.55- 0.40) | 2.22E-01        | 4.08E-01        | 3.28  | (-0.56- 7.26) | 9.45E-02        | 2.76E-01        | 2.22  | (-2.23- 6.88) | 3.32E-01        | 5.31E-01        |
| 283 | PC(14:0_16:0)     | 0.24  | (-0.64- 1.20) | 6.04E-01        | 7.09E-01        | -0.67 | (-1.66- 0.44) | 2.28E-01        | 4.13E-01        | 0.90  | (-1.55- 3.41) | 4.73E-01        | 7.26E-01        | -0.10 | (-3.15- 3.05) | 9.52E-01        | 9.75E-01        |
| 284 | PC(31:0) (a)      | 0.40  | (-0.78- 1.72) | 5.25E-01        | 6.50E-01        | -1.56 | (-2.77--0.15) | <b>3.13E-02</b> | 8.83E-02        | 2.46  | (-2.13- 7.26) | 2.97E-01        | 5.68E-01        | 0.72  | (-5.13- 6.93) | 8.13E-01        | 9.17E-01        |
| 285 | PC(31:0) (b)      | -0.86 | (-1.93- 0.36) | 1.58E-01        | 2.57E-01        | -1.02 | (-2.37- 0.58) | 1.97E-01        | 3.76E-01        | 0.17  | (-2.57- 2.99) | 9.05E-01        | 9.65E-01        | -0.52 | (-4.15- 3.26) | 7.84E-01        | 8.98E-01        |
| 286 | PC(31:1)          | 0.49  | (-0.57- 1.68) | 3.78E-01        | 5.07E-01        | -1.21 | (-2.28- 0.02) | 5.28E-02        | 1.38E-01        | 4.35  | ( 0.93- 7.88) | <b>1.26E-02</b> | 7.37E-02        | 2.19  | (-2.18- 6.76) | 3.28E-01        | 5.27E-01        |
| 287 | PC(16:0_16:0)     | -0.25 | (-1.08- 0.66) | 5.73E-01        | 6.85E-01        | -0.92 | (-1.86- 0.12) | 7.96E-02        | 1.86E-01        | -0.81 | (-2.48- 0.89) | 3.45E-01        | 6.22E-01        | -1.74 | (-3.64- 0.21) | 7.91E-02        | 2.19E-01        |
| 288 | PC(32:1)          | 1.65  | ( 0.51- 2.90) | <b>3.70E-03</b> | <b>9.44E-03</b> | 0.08  | (-1.10- 1.42) | 8.96E-01        | 9.63E-01        | 4.07  | ( 1.14- 7.08) | <b>6.52E-03</b> | 5.30E-02        | 3.13  | (-0.08- 6.44) | 5.60E-02        | 1.79E-01        |
| 289 | PC(32:2)          | 0.46  | (-0.41- 1.41) | 3.04E-01        | 4.38E-01        | -0.31 | (-1.30- 0.78) | 5.58E-01        | 7.37E-01        | 3.33  | ( 0.60- 6.13) | <b>1.67E-02</b> | 9.22E-02        | 1.85  | (-1.51- 5.33) | 2.82E-01        | 4.80E-01        |
| 290 | PC(33:0) (a)      | 0.02  | (-1.20- 1.41) | 9.76E-01        | 9.89E-01        | -1.71 | (-2.86--0.37) | <b>1.43E-02</b> | <b>4.71E-02</b> | 0.13  | (-3.32- 3.70) | 9.41E-01        | 9.79E-01        | 0.08  | (-4.35- 4.73) | 9.71E-01        | 9.85E-01        |
| 291 | PC(33:0) (b)      | -1.04 | (-1.98- 0.01) | 5.31E-02        | 1.01E-01        | -1.91 | (-2.99--0.66) | <b>4.05E-03</b> | <b>1.62E-02</b> | -0.53 | (-2.90- 1.90) | 6.64E-01        | 8.54E-01        | -1.35 | (-4.28- 1.67) | 3.76E-01        | 5.66E-01        |
| 292 | PC(33:1)          | -0.17 | (-0.98- 0.72) | 7.03E-01        | 7.75E-01        | -1.00 | (-1.89--0.02) | <b>4.68E-02</b> | 1.26E-01        | 0.38  | (-2.33- 3.18) | 7.83E-01        | 9.16E-01        | -0.22 | (-3.69- 3.37) | 9.01E-01        | 9.70E-01        |
| 293 | PC(33:2)          | -1.09 | (-1.89--0.20) | <b>1.71E-02</b> | <b>3.71E-02</b> | -1.43 | (-2.35--0.38) | <b>8.68E-03</b> | <b>3.13E-02</b> | -0.35 | (-2.89- 2.27) | 7.91E-01        | 9.16E-01        | -1.50 | (-4.70- 1.81) | 3.68E-01        | 5.64E-01        |
| 294 | PC(16:0_18:0)     | -0.19 | (-0.92- 0.60) | 6.24E-01        | 7.22E-01        | -0.32 | (-1.20- 0.64) | 4.99E-01        | 6.87E-01        | -1.01 | (-2.60- 0.62) | 2.22E-01        | 4.72E-01        | -0.37 | (-2.29- 1.58) | 7.05E-01        | 8.48E-01        |
| 295 | PC(16:0_18:1)     | 0.36  | (-0.56- 1.37) | 4.58E-01        | 5.83E-01        | -0.22 | (-1.25- 0.93) | 6.92E-01        | 8.47E-01        | -0.48 | (-2.56- 1.65) | 6.56E-01        | 8.54E-01        | -0.18 | (-2.81- 2.53) | 8.96E-01        | 9.70E-01        |
| 296 | PC(16:0_18:2)     | -0.89 | (-1.86- 0.20) | 1.05E-01        | 1.82E-01        | -0.07 | (-1.40- 1.47) | 9.22E-01        | 9.70E-01        | -0.76 | (-2.59- 1.11) | 4.23E-01        | 6.81E-01        | -1.00 | (-2.95- 1.00) | 3.22E-01        | 5.19E-01        |
| 297 | PC(16:1_18:2)     | -0.55 | (-1.35- 0.33) | 2.14E-01        | 3.29E-01        | -0.99 | (-1.94- 0.08) | 6.84E-02        | 1.68E-01        | 2.00  | (-0.20- 4.25) | 7.55E-02        | 2.45E-01        | 2.02  | (-0.64- 4.74) | 1.36E-01        | 3.13E-01        |
| 298 | PC(16:0_18:3) (a) | 0.01  | (-1.00- 1.15) | 9.78E-01        | 9.89E-01        | 0.12  | (-1.08- 1.49) | 8.48E-01        | 9.37E-01        | 0.53  | (-1.95- 3.07) | 6.78E-01        | 8.57E-01        | 1.02  | (-2.12- 4.25) | 5.26E-01        | 7.05E-01        |
| 299 | PC(14:0_20:4)     | 0.19  | (-0.59- 1.04) | 6.39E-01        | 7.32E-01        | -0.43 | (-1.33- 0.57) | 3.85E-01        | 5.82E-01        | 4.71  | ( 1.62- 7.89) | <b>2.76E-03</b> | <b>3.89E-02</b> | 5.46  | ( 1.40- 9.68) | <b>8.28E-03</b> | 6.02E-02        |
| 300 | PC(34:5)          | -0.95 | (-2.00- 0.25) | 1.16E-01        | 1.97E-01        | -1.30 | (-2.48- 0.07) | 6.15E-02        | 1.56E-01        | 7.08  | ( 2.85-11.48) | <b>9.79E-04</b> | <b>2.14E-02</b> | 8.14  | ( 2.75-13.81) | <b>2.92E-03</b> | <b>3.19E-02</b> |
| 301 | PC(15-MHDA_18:1)  | -0.60 | (-1.64- 0.56) | 2.93E-01        | 4.26E-01        | -1.99 | (-3.01--0.83) | <b>1.43E-03</b> | <b>6.39E-03</b> | -1.31 | (-4.61- 2.10) | 4.45E-01        | 6.97E-01        | -1.46 | (-5.59- 2.85) | 4.97E-01        | 6.83E-01        |
| 302 | PC(17:0_18:1)     | -0.78 | (-1.44--0.07) | <b>3.11E-02</b> | 6.30E-02        | -1.36 | (-2.10--0.54) | <b>1.62E-03</b> | <b>7.06E-03</b> | -1.11 | (-3.18- 1.00) | 2.97E-01        | 5.68E-01        | -1.12 | (-3.82- 1.65) | 4.21E-01        | 6.04E-01        |
| 303 | PC(15-MHDA_18:2)  | -0.90 | (-1.82- 0.13) | 8.58E-02        | 1.55E-01        | -1.96 | (-2.93--0.84) | <b>1.05E-03</b> | <b>5.02E-03</b> | -1.52 | (-4.66- 1.73) | 3.53E-01        | 6.25E-01        | -1.83 | (-5.87- 2.38) | 3.86E-01        | 5.75E-01        |
| 304 | PC(17:0_18:2)     | -1.11 | (-1.84--0.32) | <b>6.91E-03</b> | <b>1.65E-02</b> | -1.46 | (-2.33--0.50) | <b>3.88E-03</b> | <b>1.57E-02</b> | -1.88 | (-3.90- 0.18) | 7.26E-02        | 2.45E-01        | -1.95 | (-4.60- 0.77) | 1.56E-01        | 3.40E-01        |
| 305 | PC(17:1_18:2)     | -0.36 | (-1.09- 0.43) | 3.57E-01        | 4.85E-01        | -1.03 | (-1.85--0.13) | <b>2.64E-02</b> | 7.72E-02        | 0.98  | (-1.24- 3.25) | 3.86E-01        | 6.55E-01        | 1.74  | (-1.16- 4.73) | 2.40E-01        | 4.32E-01        |
| 306 | PC(15:0_20:3)     | 0.05  | (-1.17- 1.44) | 9.41E-01        | 9.73E-01        | 0.07  | (-1.47- 1.87) | 9.37E-01        | 9.74E-01        | -0.26 | (-1.73- 1.23) | 7.25E-01        | 8.86E-01        | -0.56 | (-2.32- 1.24) | 5.38E-01        | 7.12E-01        |
| 307 | PC(15:0_20:4)     | -0.90 | (-1.67--0.06) | <b>3.60E-02</b> | 7.11E-02        | -1.77 | (-2.58--0.87) | <b>2.74E-04</b> | <b>1.88E-03</b> | 0.98  | (-1.73- 3.77) | 4.80E-01        | 7.29E-01        | 1.92  | (-1.65- 5.63) | 2.93E-01        | 4.90E-01        |
| 308 | PC(35:5)          | -1.91 | (-3.02--0.63) | <b>4.88E-03</b> | <b>1.21E-02</b> | -2.80 | (-3.98--1.39) | <b>3.66E-04</b> | <b>2.23E-03</b> | 4.57  | ( 0.35- 8.97) | <b>3.35E-02</b> | 1.52E-01        | 4.26  | (-1.36-10.19) | 1.39E-01        | 3.14E-01        |
| 309 | PC(36:0)          | 0.35  | (-0.33- 1.08) | 3.17E-01        | 4.49E-01        | 0.18  | (-0.69- 1.12) | 7.01E-01        | 8.47E-01        | 0.86  | (-1.56- 3.34) | 4.88E-01        | 7.35E-01        | 2.54  | ( 0.02- 5.12) | <b>4.82E-02</b> | 1.69E-01        |
| 310 | PC(18:0_18:1)     | 0.64  | (-0.11- 1.46) | 9.55E-02        | 1.69E-01        | 0.21  | (-0.66- 1.15) | 6.48E-01        | 8.15E-01        | 1.00  | (-0.81- 2.85) | 2.78E-01        | 5.47E-01        | 1.51  | (-1.20- 4.30) | 2.75E-01        | 4.77E-01        |
| 311 | PC(18:0_18:2)     | -0.59 | (-1.39- 0.29) | 1.81E-01        | 2.88E-01        | -0.31 | (-1.31- 0.82) | 5.76E-01        | 7.52E-01        | 0.44  | (-1.52- 2.44) | 6.60E-01        | 8.54E-01        | -0.02 | (-2.47- 2.49) | 9.85E-01        | 9.91E-01        |
| 312 | PC(16:0_20:3) (a) | -0.19 | (-1.10- 0.81) | 7.00E-01        | 7.74E-01        | -0.66 | (-1.68- 0.49) | 2.49E-01        | 4.38E-01        | -2.82 | (-4.70--0.90) | <b>4.32E-03</b> | <b>4.82E-02</b> | -2.58 | (-5.25- 0.16) | 6.50E-02        | 1.92E-01        |
| 313 | PC(16:0_20:3) (b) | 0.42  | (-0.38- 1.29) | 3.15E-01        | 4.49E-01        | 0.31  | (-0.70- 1.43) | 5.58E-01        | 7.37E-01        | 0.96  | (-1.17- 3.13) | 3.79E-01        | 6.53E-01        | 3.32  | ( 0.37- 6.35) | <b>2.75E-02</b> | 1.19E-01        |
| 314 | PC(18:2_18:2)     | 0.50  | (-0.69- 1.84) | 4.28E-01        | 5.57E-01        | 0.15  | (-1.24- 1.77) | 8.39E-01        | 9.33E-01        | -2.39 | (-5.31- 0.62) | 1.18E-01        | 3.26E-01        | -3.83 | (-7.27--0.26) | <b>3.57E-02</b> | 1.38E-01        |
| 315 | PC(16:1_20:4)     | 0.45  | (-0.39- 1.36) | 3.02E-01        | 4.37E-01        | -0.40 | (-1.33- 0.64) | 4.35E-01        | 6.27E-01        | 3.02  | ( 0.78- 5.31) | <b>8.18E-03</b> | 6.04E-02        | 5.24  | ( 2.20- 8.37) | <b>7.43E-04</b> | <b>1.76E-02</b> |

|     |                    |       |               |                 |                 |       |               |                 |                 |       |               |                 |                 |       |               |                 |                 |
|-----|--------------------|-------|---------------|-----------------|-----------------|-------|---------------|-----------------|-----------------|-------|---------------|-----------------|-----------------|-------|---------------|-----------------|-----------------|
| 316 | PC(16:0_20:5)      | -1.88 | (-2.96--0.63) | <b>4.43E-03</b> | <b>1.10E-02</b> | -1.79 | (-3.07--0.27) | <b>2.27E-02</b> | 6.89E-02        | 3.68  | (-0.38- 7.91) | 7.61E-02        | 2.45E-01        | 5.20  | (0.48-10.14)  | <b>3.08E-02</b> | 1.29E-01        |
| 317 | PC(36:6)           | -0.64 | (-1.42- 0.21) | 1.35E-01        | 2.25E-01        | -0.93 | (-1.85- 0.09) | 7.21E-02        | 1.74E-01        | 5.11  | (1.94- 8.37)  | <b>1.56E-03</b> | <b>2.77E-02</b> | 3.99  | (-0.02- 8.16) | 5.13E-02        | 1.71E-01        |
| 318 | PC(15-MHDA_20:4)   | -1.12 | (-2.00--0.14) | <b>2.66E-02</b> | 5.51E-02        | -2.12 | (-3.08--1.03) | <b>3.59E-04</b> | <b>2.21E-03</b> | -0.66 | (-3.70- 2.48) | 6.76E-01        | 8.56E-01        | 1.62  | (-2.39- 5.79) | 4.32E-01        | 6.15E-01        |
| 319 | PC(17:0_20:4)      | -1.63 | (-2.29--0.92) | <b>2.58E-05</b> | <b>9.30E-05</b> | -1.66 | (-2.41--0.84) | <b>1.77E-04</b> | <b>1.31E-03</b> | -0.55 | (-2.87- 1.83) | 6.45E-01        | 8.52E-01        | 0.96  | (-2.03- 4.04) | 5.30E-01        | 7.09E-01        |
| 320 | PC(15:0_22:6)      | -1.99 | (-2.70--1.21) | <b>3.93E-06</b> | <b>1.55E-05</b> | -1.58 | (-2.48--0.57) | <b>3.04E-03</b> | <b>1.25E-02</b> | 0.74  | (-2.10- 3.66) | 6.11E-01        | 8.24E-01        | 0.52  | (-3.08- 4.26) | 7.80E-01        | 8.97E-01        |
| 321 | PC(38:2)           | 0.98  | (0.23- 1.78)  | <b>9.39E-03</b> | <b>2.16E-02</b> | 0.87  | (-0.10- 1.93) | 7.94E-02        | 1.86E-01        | 0.64  | (-0.76- 2.06) | 3.67E-01        | 6.37E-01        | 1.98  | (0.01- 3.98)  | <b>4.89E-02</b> | 1.69E-01        |
| 322 | PC(18:0_20:3)      | 0.19  | (-0.51- 0.93) | 6.09E-01        | 7.13E-01        | 0.11  | (-0.80- 1.11) | 8.24E-01        | 9.22E-01        | 4.07  | (1.92- 6.27)  | <b>2.27E-04</b> | <b>9.89E-03</b> | 7.65  | (4.41-11.00)  | <b>4.56E-06</b> | <b>1.04E-03</b> |
| 323 | PC(18:1_20:3)      | 0.62  | (-0.22- 1.52) | 1.51E-01        | 2.47E-01        | -0.17 | (-1.07- 0.82) | 7.27E-01        | 8.57E-01        | 0.17  | (-1.75- 2.14) | 8.59E-01        | 9.40E-01        | 2.37  | (-0.35- 5.16) | 8.77E-02        | 2.37E-01        |
| 324 | PC(38:4) (b)       | -0.05 | (-0.99- 0.99) | 9.22E-01        | 9.58E-01        | -0.06 | (-1.18- 1.21) | 9.26E-01        | 9.70E-01        | 0.85  | (-1.51- 3.27) | 4.82E-01        | 7.29E-01        | 3.49  | (0.40- 6.67)  | <b>2.66E-02</b> | 1.19E-01        |
| 325 | PC(18:0_20:4)      | -1.14 | (-1.87--0.34) | <b>5.99E-03</b> | <b>1.45E-02</b> | -0.86 | (-1.79- 0.17) | 9.85E-02        | 2.23E-01        | 1.09  | (-1.09- 3.30) | 3.28E-01        | 6.08E-01        | 3.01  | (0.14- 5.97)  | <b>3.98E-02</b> | 1.49E-01        |
| 326 | PC(38:5) (a)       | -1.04 | (-1.68--0.35) | <b>3.90E-03</b> | <b>9.89E-03</b> | -1.25 | (-2.06--0.35) | <b>7.37E-03</b> | <b>2.79E-02</b> | -0.36 | (-2.25- 1.57) | 7.14E-01        | 8.85E-01        | 1.30  | (-1.17- 3.83) | 3.02E-01        | 5.02E-01        |
| 327 | PC(38:5) (b)       | 0.14  | (-0.70- 1.05) | 7.52E-01        | 8.15E-01        | 0.22  | (-0.84- 1.40) | 6.95E-01        | 8.47E-01        | 1.13  | (-1.57- 3.91) | 4.14E-01        | 6.76E-01        | 2.83  | (-0.37- 6.14) | 8.28E-02        | 2.28E-01        |
| 328 | PC(38:6) (a)       | 0.03  | (-0.91- 1.07) | 9.51E-01        | 9.77E-01        | -0.01 | (-1.09- 1.19) | 9.80E-01        | 9.90E-01        | -0.19 | (-2.41- 2.08) | 8.66E-01        | 9.44E-01        | 1.00  | (-2.07- 4.17) | 5.25E-01        | 7.05E-01        |
| 329 | PC(16:0_22:6)      | -1.37 | (-2.26--0.37) | <b>8.36E-03</b> | <b>1.96E-02</b> | -0.95 | (-2.03- 0.27) | 1.20E-01        | 2.58E-01        | 0.50  | (-2.15- 3.22) | 7.15E-01        | 8.85E-01        | -0.43 | (-3.81- 3.07) | 8.07E-01        | 9.17E-01        |
| 330 | PC(18:2_20:5)      | -0.59 | (-1.59- 0.53) | 2.87E-01        | 4.18E-01        | -0.70 | (-1.90- 0.68) | 3.05E-01        | 4.98E-01        | 2.05  | (-1.40- 5.62) | 2.46E-01        | 5.03E-01        | 3.99  | (-0.32- 8.48) | 6.95E-02        | 2.03E-01        |
| 331 | PC(16:1_22:6)      | -0.81 | (-1.50--0.06) | <b>3.54E-02</b> | 7.02E-02        | -1.22 | (-2.03--0.33) | <b>8.62E-03</b> | <b>3.13E-02</b> | 1.62  | (-0.94- 4.23) | 2.15E-01        | 4.66E-01        | 2.07  | (-1.01- 5.25) | 1.89E-01        | 3.72E-01        |
| 332 | PC(38:7)(c)        | -0.92 | (-1.54--0.25) | <b>7.98E-03</b> | <b>1.88E-02</b> | -0.71 | (-1.49- 0.14) | 1.00E-01        | 2.25E-01        | 0.28  | (-1.86- 2.47) | 7.99E-01        | 9.16E-01        | 0.02  | (-2.61- 2.71) | 9.91E-01        | 9.91E-01        |
| 333 | PC(39:5)(a)        | -1.75 | (-2.57--0.83) | <b>3.70E-04</b> | <b>1.10E-03</b> | -2.10 | (-3.10--0.95) | <b>7.13E-04</b> | <b>3.76E-03</b> | -0.44 | (-3.46- 2.68) | 7.80E-01        | 9.16E-01        | -0.32 | (-4.36- 3.90) | 8.80E-01        | 9.66E-01        |
| 334 | PC(39:5)(b)        | -1.89 | (-2.68--1.01) | <b>8.04E-05</b> | <b>2.72E-04</b> | -1.82 | (-2.76--0.76) | <b>1.36E-03</b> | <b>6.19E-03</b> | -1.18 | (-4.17- 1.89) | 4.44E-01        | 6.97E-01        | -0.17 | (-3.85- 3.64) | 9.28E-01        | 9.75E-01        |
| 335 | PC(15-MHDA_22:6)   | -1.84 | (-2.69--0.89) | <b>3.31E-04</b> | <b>9.86E-04</b> | -2.26 | (-3.27--1.11) | <b>3.42E-04</b> | <b>2.19E-03</b> | -1.04 | (-3.88- 1.88) | 4.77E-01        | 7.28E-01        | -1.22 | (-5.04- 2.75) | 5.38E-01        | 7.12E-01        |
| 336 | PC(17:0_22:6)      | -2.46 | (-3.13--1.72) | <b>6.30E-09</b> | <b>3.64E-08</b> | -1.74 | (-2.64--0.71) | <b>1.44E-03</b> | <b>6.39E-03</b> | -0.28 | (-3.17- 2.70) | 8.50E-01        | 9.40E-01        | -0.45 | (-4.08- 3.32) | 8.12E-01        | 9.17E-01        |
| 337 | PC(18:0_22:5) (n6) | -1.73 | (-3.03--0.17) | <b>3.09E-02</b> | 6.28E-02        | -0.35 | (-2.32- 2.14) | 7.63E-01        | 8.85E-01        | 1.64  | (-0.82- 4.17) | 1.92E-01        | 4.33E-01        | 3.63  | (0.39- 6.98)  | <b>2.81E-02</b> | 1.19E-01        |
| 338 | PC(18:0_22:6)      | -1.78 | (-2.56--0.92) | <b>1.28E-04</b> | <b>4.22E-04</b> | -0.83 | (-1.94- 0.44) | 1.91E-01        | 3.68E-01        | 3.12  | (0.46- 5.86)  | <b>2.16E-02</b> | 1.10E-01        | 3.17  | (-0.31- 6.78) | 7.42E-02        | 2.11E-01        |
| 339 | PC(40:7) (a)       | 1.11  | (-0.16- 2.53) | 8.81E-02        | 1.58E-01        | 0.82  | (-0.56- 2.41) | 2.57E-01        | 4.48E-01        | 0.56  | (-1.86- 3.03) | 6.53E-01        | 8.54E-01        | 2.78  | (-0.68- 6.36) | 1.16E-01        | 2.80E-01        |
| 340 | PC(18:1_22:6) (a)  | -0.29 | (-1.18- 0.70) | 5.54E-01        | 6.72E-01        | -0.54 | (-1.59- 0.63) | 3.50E-01        | 5.53E-01        | -1.88 | (-4.02- 0.31) | 9.10E-02        | 2.70E-01        | -0.98 | (-3.53- 1.65) | 4.59E-01        | 6.42E-01        |
| 341 | PC(40:8)           | 1.00  | (0.16- 1.92)  | <b>1.88E-02</b> | <b>3.97E-02</b> | 0.64  | (-0.31- 1.69) | 1.96E-01        | 3.76E-01        | -1.34 | (-3.23- 0.58) | 1.69E-01        | 4.07E-01        | -0.28 | (-2.77- 2.28) | 8.27E-01        | 9.21E-01        |
| 342 | PC(44:12)          | -1.20 | (-2.14--0.13) | <b>2.87E-02</b> | 5.89E-02        | -0.64 | (-1.81- 0.70) | 3.31E-01        | 5.28E-01        | -0.51 | (-4.52- 3.66) | 8.05E-01        | 9.16E-01        | -0.87 | (-5.51- 4.00) | 7.20E-01        | 8.50E-01        |
| 343 | PC(O-16:0/16:0)    | 0.50  | (-0.35- 1.42) | 2.60E-01        | 3.86E-01        | 0.45  | (-0.53- 1.54) | 3.79E-01        | 5.75E-01        | -0.62 | (-2.10- 0.89) | 4.16E-01        | 6.76E-01        | -1.46 | (-3.27- 0.38) | 1.18E-01        | 2.83E-01        |
| 344 | PC(O-32:1)         | 1.20  | (0.21- 2.28)  | <b>1.64E-02</b> | <b>3.57E-02</b> | 0.22  | (-0.88- 1.45) | 7.10E-01        | 8.47E-01        | 0.19  | (-1.85- 2.27) | 8.56E-01        | 9.40E-01        | -0.57 | (-2.70- 1.59) | 5.99E-01        | 7.62E-01        |
| 345 | PC(O-34:1)         | 1.05  | (0.18- 2.01)  | <b>1.75E-02</b> | <b>3.77E-02</b> | 0.22  | (-0.78- 1.33) | 6.75E-01        | 8.33E-01        | -1.96 | (-3.30--0.60) | <b>5.04E-03</b> | <b>4.82E-02</b> | -2.29 | (-4.00--0.54) | <b>1.07E-02</b> | 6.90E-02        |
| 346 | PC(O-34:2)         | -0.17 | (-1.05- 0.80) | 7.20E-01        | 7.86E-01        | 0.13  | (-1.02- 1.42) | 8.35E-01        | 9.32E-01        | -1.11 | (-3.41- 1.23) | 3.47E-01        | 6.22E-01        | -2.03 | (-4.76- 0.79) | 1.55E-01        | 3.40E-01        |
| 347 | PC(O-34:4)         | 0.43  | (-0.54- 1.50) | 3.97E-01        | 5.27E-01        | -0.50 | (-1.45- 0.56) | 3.42E-01        | 5.43E-01        | 0.50  | (-3.15- 4.29) | 7.91E-01        | 9.16E-01        | 3.00  | (-1.17- 7.35) | 1.60E-01        | 3.41E-01        |
| 348 | PC(O-35:4)         | -0.23 | (-1.06- 0.67) | 6.00E-01        | 7.06E-01        | -0.74 | (-1.72- 0.35) | 1.74E-01        | 3.43E-01        | 0.10  | (-3.29- 3.62) | 9.52E-01        | 9.83E-01        | 1.61  | (-2.69- 6.09) | 4.67E-01        | 6.50E-01        |
| 349 | PC(O-36:0)         | 0.42  | (-0.64- 1.60) | 4.53E-01        | 5.79E-01        | -0.03 | (-1.28- 1.41) | 9.70E-01        | 9.87E-01        | -2.10 | (-3.83--0.34) | <b>1.97E-02</b> | 1.05E-01        | -2.53 | (-4.73--0.28) | <b>2.79E-02</b> | 1.19E-01        |
| 350 | PC(O-18:0/18:1)    | 1.55  | (0.63- 2.54)  | <b>7.13E-04</b> | <b>2.02E-03</b> | 1.06  | (0.01- 2.22)  | <b>4.81E-02</b> | 1.28E-01        | -3.34 | (-4.86--1.79) | <b>3.82E-05</b> | <b>4.46E-03</b> | -2.26 | (-4.14--0.36) | <b>2.06E-02</b> | 1.05E-01        |
| 351 | PC(O-18:1/18:1)    | 1.04  | (0.25- 1.90)  | <b>9.51E-03</b> | <b>2.17E-02</b> | 0.26  | (-0.66- 1.27) | 5.93E-01        | 7.64E-01        | -1.48 | (-2.89--0.04) | <b>4.38E-02</b> | 1.91E-01        | -1.92 | (-3.64--0.17) | <b>3.20E-02</b> | 1.31E-01        |
| 352 | PC(O-18:0/18:2)    | 0.61  | (-0.21- 1.50) | 1.51E-01        | 2.47E-01        | 0.26  | (-0.70- 1.32) | 6.13E-01        | 7.83E-01        | -1.98 | (-3.91--0.02) | <b>4.82E-02</b> | 1.98E-01        | -2.99 | (-5.34--0.59) | <b>1.54E-02</b> | 8.50E-02        |
| 353 | PC(O-18:1/18:2)    | -0.04 | (-0.87- 0.86) | 9.25E-01        | 9.59E-01        | -0.07 | (-1.09- 1.07) | 9.02E-01        | 9.63E-01        | -0.65 | (-2.52- 1.25) | 4.99E-01        | 7.37E-01        | -1.92 | (-4.31- 0.53) | 1.23E-01        | 2.91E-01        |
| 354 | PC(O-16:0/20:3)    | 0.28  | (-0.58- 1.21) | 5.36E-01        | 6.58E-01        | 0.66  | (-0.46- 1.90) | 2.59E-01        | 4.50E-01        | 0.68  | (-1.19- 2.59) | 4.76E-01        | 7.28E-01        | 1.95  | (-0.44- 4.40) | 1.10E-01        | 2.72E-01        |
| 355 | PC(O-16:0/20:4)    | -0.18 | (-0.93- 0.63) | 6.49E-01        | 7.36E-01        | -0.04 | (-0.94- 0.96) | 9.37E-01        | 9.74E-01        | 0.58  | (-1.38- 2.58) | 5.63E-01        | 7.90E-01        | 0.96  | (-1.34- 3.32) | 4.15E-01        | 6.02E-01        |
| 356 | PC(O-36:5)         | -1.35 | (-2.17--0.45) | <b>4.42E-03</b> | <b>1.10E-02</b> | -0.51 | (-1.62- 0.74) | 4.05E-01        | 6.00E-01        | 2.46  | (-1.21- 6.27) | 1.90E-01        | 4.31E-01        | 3.61  | (-0.71- 8.11) | 1.02E-01        | 2.63E-01        |
| 357 | PC(O-18:0/20:4)    | -0.31 | (-1.01- 0.46) | 4.20E-01        | 5.53E-01        | -0.28 | (-1.10- 0.63) | 5.35E-01        | 7.24E-01        | -1.24 | (-3.20- 0.75) | 2.18E-01        | 4.66E-01        | -1.13 | (-3.29- 1.07) | 3.09E-01        | 5.08E-01        |
| 358 | PC(O-38:5)         | -0.03 | (-0.89- 0.90) | 9.43E-01        | 9.74E-01        | -0.24 | (-1.30- 0.94) | 6.73E-01        | 8.33E-01        | 0.43  | (-1.39- 2.28) | 6.46E-01        | 8.52E-01        | 0.07  | (-2.04- 2.23) | 9.46E-01        | 9.75E-01        |
| 359 | PC(O-16:0/22:6)    | -1.00 | (-1.77--0.16) | <b>2.02E-02</b> | <b>4.22E-02</b> | -0.42 | (-1.37- 0.63) | 4.15E-01        | 6.09E-01        | 1.60  | (-0.89- 4.16) | 2.08E-01        | 4.58E-01        | 0.86  | (-2.08- 3.89) | 5.67E-01        | 7.36E-01        |
| 360 | PC(O-40:5)         | 0.01  | (-0.67- 0.74) | 9.79E-01        | 9.89E-01        | -0.37 | (-1.18- 0.51) | 4.00E-01        | 5.96E-01        | -0.29 | (-2.02- 1.48) | 7.47E-01        | 8.99E-01        | -1.20 | (-3.28- 0.92) | 2.62E-01        | 4.57E-01        |
| 361 | PC(O-18:0/22:6)    | -1.03 | (-1.69--0.32) | <b>5.47E-03</b> | <b>1.35E-02</b> | -0.70 | (-1.51- 0.18) | 1.13E-01        | 2.46E-01        | -0.55 | (-2.51- 1.44) | 5.83E-01        | 8.05E-01        | -2.02 | (-4.34- 0.35) | 9.42E-02        | 2.49E-01        |



|     |                     |       |               |                 |                 |       |               |                 |                 |       |               |                 |                 |       |               |                 |          |
|-----|---------------------|-------|---------------|-----------------|-----------------|-------|---------------|-----------------|-----------------|-------|---------------|-----------------|-----------------|-------|---------------|-----------------|----------|
| 362 | PC(O-40:7) (a)      | -0.64 | (-1.39- 0.17) | 1.19E-01        | 2.01E-01        | -0.78 | (-1.65- 0.19) | 1.10E-01        | 2.42E-01        | 0.74  | (-1.65- 3.18) | 5.47E-01        | 7.80E-01        | -0.84 | (-3.61- 2.01) | 5.55E-01        | 7.26E-01 |
| 363 | PC(P-16:0/14:0)     | -0.22 | (-1.11- 0.76) | 6.52E-01        | 7.36E-01        | -0.42 | (-1.55- 0.86) | 5.01E-01        | 6.87E-01        | 0.13  | (-2.37- 2.70) | 9.18E-01        | 9.69E-01        | 0.13  | (-2.71- 3.06) | 9.28E-01        | 9.75E-01 |
| 364 | PC(P-16:0/16:0)     | -0.52 | (-1.34- 0.38) | 2.45E-01        | 3.66E-01        | -0.43 | (-1.43- 0.69) | 4.40E-01        | 6.28E-01        | -0.86 | (-2.63- 0.95) | 3.47E-01        | 6.22E-01        | -1.52 | (-3.47- 0.47) | 1.32E-01        | 3.06E-01 |
| 365 | PC(P-16:0/16:1)     | 0.15  | (-0.73- 1.13) | 7.42E-01        | 8.06E-01        | -0.21 | (-1.26- 0.97) | 7.15E-01        | 8.47E-01        | 1.14  | (-0.90- 3.22) | 2.73E-01        | 5.44E-01        | 0.76  | (-1.48- 3.04) | 5.08E-01        | 6.94E-01 |
| 366 | PC(P-16:0/18:0)     | -0.30 | (-0.98- 0.44) | 4.20E-01        | 5.53E-01        | -0.05 | (-0.89- 0.85) | 9.03E-01        | 9.63E-01        | -2.07 | (-3.33--0.79) | <b>1.71E-03</b> | <b>2.82E-02</b> | -1.93 | (-3.50--0.32) | <b>1.93E-02</b> | 1.01E-01 |
| 367 | PC(P-16:0/18:1)     | -0.19 | (-0.93- 0.62) | 6.41E-01        | 7.32E-01        | -0.32 | (-1.24- 0.70) | 5.22E-01        | 7.08E-01        | -1.85 | (-3.38--0.29) | <b>2.02E-02</b> | 1.07E-01        | -1.85 | (-3.75- 0.09) | 6.13E-02        | 1.88E-01 |
| 368 | PC(P-16:0/18:2)     | -1.57 | (-2.30--0.77) | <b>2.57E-04</b> | <b>7.96E-04</b> | -0.83 | (-1.84- 0.31) | 1.45E-01        | 3.00E-01        | -0.81 | (-2.86- 1.28) | 4.43E-01        | 6.97E-01        | -1.85 | (-4.29- 0.66) | 1.47E-01        | 3.29E-01 |
| 369 | PC(P-16:0/18:3)     | -0.54 | (-1.23- 0.21) | 1.55E-01        | 2.53E-01        | -0.35 | (-1.17- 0.55) | 4.32E-01        | 6.27E-01        | 0.37  | (-1.97- 2.75) | 7.60E-01        | 9.12E-01        | -0.76 | (-3.42- 1.97) | 5.78E-01        | 7.46E-01 |
| 370 | PC(P-35:2) (a)      | -0.18 | (-1.06- 0.78) | 6.99E-01        | 7.74E-01        | -0.79 | (-1.84- 0.39) | 1.81E-01        | 3.53E-01        | -1.40 | (-4.65- 1.97) | 4.09E-01        | 6.75E-01        | -3.01 | (-7.03- 1.18) | 1.55E-01        | 3.40E-01 |
| 371 | PC(P-35:2) (b)      | -1.75 | (-2.52--0.90) | <b>1.33E-04</b> | <b>4.34E-04</b> | -1.04 | (-2.03- 0.07) | 6.41E-02        | 1.60E-01        | -2.17 | (-4.70- 0.42) | 9.96E-02        | 2.86E-01        | -2.64 | (-5.78- 0.61) | 1.10E-01        | 2.72E-01 |
| 372 | PC(P-15:0/20:4) (b) | -0.96 | (-1.85- 0.03) | 5.62E-02        | 1.07E-01        | -0.31 | (-1.45- 0.99) | 6.27E-01        | 7.96E-01        | 0.16  | (-2.68- 3.08) | 9.11E-01        | 9.68E-01        | 1.40  | (-1.99- 4.90) | 4.21E-01        | 6.04E-01 |
| 373 | PC(P-18:1/18:1)     | 1.43  | ( 0.35- 2.63) | <b>8.79E-03</b> | <b>2.04E-02</b> | 0.97  | (-0.31- 2.42) | 1.45E-01        | 3.00E-01        | -0.57 | (-2.19- 1.08) | 4.92E-01        | 7.35E-01        | 0.21  | (-1.67- 2.13) | 8.24E-01        | 9.21E-01 |
| 374 | PC(P-18:0/18:2)     | -0.60 | (-1.28- 0.14) | 1.07E-01        | 1.84E-01        | -0.67 | (-1.55- 0.30) | 1.67E-01        | 3.35E-01        | -2.43 | (-4.45--0.37) | <b>2.12E-02</b> | 1.10E-01        | -3.16 | (-5.41--0.85) | <b>7.88E-03</b> | 6.01E-02 |
| 375 | PC(P-16:0/20:4)     | -1.23 | (-1.93--0.46) | <b>2.23E-03</b> | <b>5.95E-03</b> | -0.83 | (-1.73- 0.17) | 9.99E-02        | 2.25E-01        | 0.38  | (-1.65- 2.45) | 7.13E-01        | 8.85E-01        | 0.56  | (-1.91- 3.10) | 6.57E-01        | 8.10E-01 |
| 376 | PC(P-16:0/20:5)     | -2.29 | (-3.14--1.33) | <b>1.72E-05</b> | <b>6.30E-05</b> | -1.43 | (-2.56--0.13) | <b>3.29E-02</b> | 9.22E-02        | 3.50  | (-0.16- 7.30) | 6.11E-02        | 2.20E-01        | 3.19  | (-1.51- 8.11) | 1.85E-01        | 3.70E-01 |
| 377 | PC(P-17:0/20:4) (a) | -1.29 | (-2.15--0.32) | <b>1.04E-02</b> | <b>2.36E-02</b> | -1.79 | (-2.78--0.66) | <b>2.76E-03</b> | <b>1.16E-02</b> | -0.74 | (-3.98- 2.60) | 6.57E-01        | 8.54E-01        | -0.35 | (-4.60- 4.09) | 8.75E-01        | 9.63E-01 |
| 378 | PC(P-17:0/20:4) (b) | -2.12 | (-2.86--1.31) | <b>2.76E-06</b> | <b>1.10E-05</b> | -1.46 | (-2.40--0.41) | <b>7.72E-03</b> | <b>2.83E-02</b> | -1.20 | (-3.85- 1.54) | 3.85E-01        | 6.55E-01        | -0.10 | (-3.46- 3.38) | 9.55E-01        | 9.75E-01 |
| 379 | PC(P-18:0/20:4)     | -1.18 | (-1.84--0.48) | <b>1.45E-03</b> | <b>3.91E-03</b> | -0.88 | (-1.68- 0.01) | 5.25E-02        | 1.38E-01        | -0.99 | (-3.10- 1.16) | 3.62E-01        | 6.36E-01        | -0.03 | (-2.62- 2.64) | 9.84E-01        | 9.91E-01 |
| 380 | PC(P-38:5) (a)      | -1.28 | (-1.98--0.52) | <b>1.39E-03</b> | <b>3.78E-03</b> | -1.06 | (-1.92--0.10) | <b>3.11E-02</b> | 8.83E-02        | 0.64  | (-1.40- 2.73) | 5.38E-01        | 7.71E-01        | 1.49  | (-1.04- 4.08) | 2.49E-01        | 4.40E-01 |
| 381 | PC(P-38:5) (b)      | -0.85 | (-1.67- 0.04) | 6.12E-02        | 1.15E-01        | -0.77 | (-1.74- 0.31) | 1.54E-01        | 3.17E-01        | -0.39 | (-2.60- 1.87) | 7.31E-01        | 8.86E-01        | -0.02 | (-2.65- 2.68) | 9.89E-01        | 9.91E-01 |
| 382 | PC(P-16:0/22:6)     | -1.66 | (-2.39--0.87) | <b>9.95E-05</b> | <b>3.34E-04</b> | -1.21 | (-2.13--0.19) | <b>2.17E-02</b> | 6.63E-02        | 0.84  | (-1.69- 3.44) | 5.18E-01        | 7.51E-01        | -0.10 | (-3.19- 3.08) | 9.47E-01        | 9.75E-01 |
| 383 | PC(P-20:0/20:4)     | -1.01 | (-1.76--0.19) | <b>1.72E-02</b> | <b>3.71E-02</b> | -0.60 | (-1.54- 0.45) | 2.49E-01        | 4.38E-01        | -1.46 | (-3.34- 0.46) | 1.35E-01        | 3.48E-01        | -2.02 | (-4.42- 0.44) | 1.06E-01        | 2.68E-01 |
| 384 | PC(P-40:5) (b)      | -0.93 | (-1.59--0.23) | <b>1.07E-02</b> | <b>2.42E-02</b> | -0.55 | (-1.36- 0.35) | 2.24E-01        | 4.09E-01        | -1.16 | (-3.01- 0.73) | 2.27E-01        | 4.75E-01        | -1.23 | (-3.35- 0.93) | 2.59E-01        | 4.51E-01 |
| 385 | PC(P-18:0/22:6)     | -1.73 | (-2.38--1.03) | <b>6.54E-06</b> | <b>2.50E-05</b> | -1.24 | (-2.06--0.33) | <b>8.94E-03</b> | <b>3.15E-02</b> | -1.02 | (-3.45- 1.47) | 4.16E-01        | 6.76E-01        | -2.19 | (-5.18- 0.88) | 1.59E-01        | 3.41E-01 |
| 386 | PE(16:0_16:1)       | 0.79  | (-0.57- 2.35) | 2.67E-01        | 3.95E-01        | 0.10  | (-1.39- 1.84) | 9.03E-01        | 9.63E-01        | 4.60  | (-0.05- 9.48) | 5.25E-02        | 2.08E-01        | 4.25  | (-1.08- 9.86) | 1.19E-01        | 2.83E-01 |
| 387 | PE(16:0_18:1)       | -0.45 | (-1.29- 0.47) | 3.22E-01        | 4.53E-01        | -0.64 | (-1.79- 0.67) | 3.23E-01        | 5.18E-01        | 0.33  | (-2.93- 3.71) | 8.43E-01        | 9.40E-01        | 0.13  | (-4.04- 4.47) | 9.54E-01        | 9.75E-01 |
| 388 | PE(16:0_18:2)       | -1.02 | (-1.89--0.05) | <b>3.98E-02</b> | 7.73E-02        | -0.08 | (-1.29- 1.29) | 8.97E-01        | 9.63E-01        | -0.28 | (-3.93- 3.51) | 8.82E-01        | 9.49E-01        | -2.10 | (-6.28- 2.26) | 3.37E-01        | 5.37E-01 |
| 389 | PE(16:1_18:2)       | 0.47  | (-0.56- 1.61) | 3.84E-01        | 5.13E-01        | 0.32  | (-0.87- 1.66) | 6.12E-01        | 7.83E-01        | 0.31  | (-2.73- 3.43) | 8.45E-01        | 9.40E-01        | -0.52 | (-4.03- 3.13) | 7.76E-01        | 8.97E-01 |
| 390 | PE(16:0_18:3) (a)   | 0.26  | (-0.79- 1.42) | 6.46E-01        | 7.36E-01        | -0.14 | (-1.30- 1.16) | 8.18E-01        | 9.20E-01        | -0.70 | (-4.39- 3.13) | 7.15E-01        | 8.85E-01        | -0.85 | (-5.27- 3.77) | 7.11E-01        | 8.49E-01 |
| 391 | PE(16:0_18:3) (b)   | 0.43  | (-0.64- 1.64) | 4.43E-01        | 5.70E-01        | 0.90  | (-0.50- 2.52) | 2.20E-01        | 4.08E-01        | 1.62  | (-2.42- 5.83) | 4.36E-01        | 6.92E-01        | 2.25  | (-2.68- 7.43) | 3.75E-01        | 5.66E-01 |
| 392 | PE(17:0_18:2)       | -0.71 | (-1.41- 0.04) | 6.27E-02        | 1.17E-01        | -1.00 | (-1.74--0.20) | <b>1.57E-02</b> | 5.09E-02        | -1.54 | (-4.48- 1.50) | 3.15E-01        | 5.90E-01        | -0.65 | (-4.27- 3.11) | 7.31E-01        | 8.58E-01 |
| 393 | PE(18:0_18:1)       | -0.15 | (-1.11- 0.91) | 7.66E-01        | 8.26E-01        | 0.04  | (-1.23- 1.48) | 9.57E-01        | 9.85E-01        | 2.46  | (-0.64- 5.67) | 1.21E-01        | 3.31E-01        | 2.72  | (-1.38- 6.99) | 1.95E-01        | 3.79E-01 |
| 394 | PE(18:1_18:1)       | 0.51  | (-0.94- 2.19) | 5.12E-01        | 6.35E-01        | -0.76 | (-2.24- 1.00) | 3.73E-01        | 5.75E-01        | 0.25  | (-2.69- 3.28) | 8.68E-01        | 9.44E-01        | -0.29 | (-4.08- 3.66) | 8.84E-01        | 9.67E-01 |
| 395 | PE(18:0_18:2)       | -0.99 | (-1.81--0.09) | <b>3.15E-02</b> | 6.35E-02        | 0.27  | (-0.86- 1.55) | 6.50E-01        | 8.15E-01        | 1.99  | (-1.21- 5.30) | 2.25E-01        | 4.75E-01        | 0.21  | (-3.66- 4.24) | 9.16E-01        | 9.75E-01 |
| 396 | PE(18:1_18:2)       | -0.38 | (-1.38- 0.74) | 4.92E-01        | 6.17E-01        | -0.10 | (-1.25- 1.20) | 8.73E-01        | 9.49E-01        | -1.86 | (-5.14- 1.53) | 2.76E-01        | 5.46E-01        | -2.88 | (-7.07- 1.50) | 1.93E-01        | 3.76E-01 |
| 397 | PE(16:0_20:3)       | -0.36 | (-1.29- 0.67) | 4.82E-01        | 6.07E-01        | -0.07 | (-1.29- 1.32) | 9.17E-01        | 9.70E-01        | 0.39  | (-2.93- 3.82) | 8.20E-01        | 9.30E-01        | -0.99 | (-5.22- 3.42) | 6.51E-01        | 8.08E-01 |
| 398 | PE(16:0_20:4)       | -0.38 | (-1.16- 0.46) | 3.60E-01        | 4.87E-01        | -0.10 | (-1.13- 1.06) | 8.64E-01        | 9.47E-01        | -0.96 | (-4.10- 2.27) | 5.53E-01        | 7.83E-01        | -2.43 | (-6.13- 1.42) | 2.11E-01        | 4.01E-01 |
| 399 | PE(16:1_20:4)       | 0.97  | (-0.10- 2.15) | 7.71E-02        | 1.41E-01        | 0.33  | (-0.91- 1.74) | 6.20E-01        | 7.90E-01        | 1.50  | (-1.26- 4.33) | 2.88E-01        | 5.55E-01        | 0.27  | (-2.93- 3.58) | 8.69E-01        | 9.59E-01 |
| 400 | PE(16:0_20:5)       | -0.90 | (-1.87- 0.18) | 9.99E-02        | 1.74E-01        | -0.71 | (-1.91- 0.68) | 3.00E-01        | 4.96E-01        | 2.40  | (-1.13- 6.06) | 1.84E-01        | 4.24E-01        | 0.83  | (-3.33- 5.17) | 6.99E-01        | 8.47E-01 |
| 401 | PE(17:0_20:4)       | -1.83 | (-2.56--1.02) | <b>3.39E-05</b> | <b>1.20E-04</b> | -1.32 | (-2.30--0.23) | <b>1.97E-02</b> | 6.11E-02        | -1.06 | (-3.85- 1.81) | 4.64E-01        | 7.18E-01        | -1.91 | (-5.34- 1.64) | 2.84E-01        | 4.81E-01 |
| 402 | PE(18:0_20:3) (a)   | -0.67 | (-1.50- 0.24) | 1.45E-01        | 2.40E-01        | -0.43 | (-1.44- 0.71) | 4.44E-01        | 6.30E-01        | 3.27  | ( 0.31- 6.33) | <b>3.03E-02</b> | 1.43E-01        | 4.21  | ( 0.20- 8.38) | <b>3.97E-02</b> | 1.49E-01 |
| 403 | PE(18:0_20:4)       | -0.88 | (-1.60--0.10) | <b>2.71E-02</b> | 5.58E-02        | -0.29 | (-1.29- 0.83) | 5.94E-01        | 7.64E-01        | 0.78  | (-1.83- 3.47) | 5.60E-01        | 7.88E-01        | 0.12  | (-3.17- 3.52) | 9.45E-01        | 9.75E-01 |
| 404 | PE(38:5) (a)        | -0.56 | (-1.35- 0.31) | 1.98E-01        | 3.10E-01        | -0.58 | (-1.59- 0.56) | 3.03E-01        | 4.98E-01        | -1.44 | (-4.36- 1.57) | 3.43E-01        | 6.22E-01        | -1.69 | (-5.42- 2.19) | 3.87E-01        | 5.75E-01 |
| 405 | PE(38:5) (b)        | 0.37  | (-0.91- 1.83) | 5.91E-01        | 7.01E-01        | 0.64  | (-1.02- 2.60) | 4.71E-01        | 6.59E-01        | 1.89  | (-1.70- 5.62) | 3.04E-01        | 5.75E-01        | -0.63 | (-5.08- 4.03) | 7.87E-01        | 8.98E-01 |
| 406 | PE(16:0_22:6)       | -1.91 | (-2.69--1.05) | <b>4.47E-05</b> | <b>1.55E-04</b> | -0.94 | (-2.05- 0.32) | 1.36E-01        | 2.85E-01        | 0.66  | (-3.01- 4.47) | 7.26E-01        | 8.86E-01        | -2.20 | (-6.35- 2.14) | 3.13E-01        | 5.12E-01 |
| 407 | PE(17:0_22:6)       | -1.98 | (-2.73--1.15) | <b>1.42E-05</b> | <b>5.32E-05</b> | -0.85 | (-1.77- 0.18) | 1.03E-01        | 2.28E-01        | 0.36  | (-2.40- 3.19) | 8.02E-01        | 9.16E-01        | -0.67 | (-4.13- 2.91) | 7.08E-01        | 8.49E-01 |

|     |                      |       |               |                 |                 |       |               |                 |                 |       |               |                 |                 |       |               |                 |                 |
|-----|----------------------|-------|---------------|-----------------|-----------------|-------|---------------|-----------------|-----------------|-------|---------------|-----------------|-----------------|-------|---------------|-----------------|-----------------|
| 408 | PE(18:0_22:4)        | -0.28 | (-1.26-0.80)  | 5.95E-01        | 7.04E-01        | 0.09  | (-1.24-1.62)  | 8.99E-01        | 9.63E-01        | 2.66  | (-0.04-5.42)  | 5.34E-02        | 2.10E-01        | 1.85  | (-1.70-5.52)  | 3.08E-01        | 5.08E-01        |
| 409 | PE(18:0_22:5) (n3)   | -1.83 | (-2.72--0.83) | <b>6.62E-04</b> | <b>1.93E-03</b> | 0.21  | (-1.17-1.82)  | 7.76E-01        | 8.91E-01        | 2.74  | (-0.41-5.99)  | 8.81E-02        | 2.66E-01        | 2.13  | (-1.43-5.82)  | 2.42E-01        | 4.32E-01        |
| 410 | PE(18:0_22:5) (n6)   | -0.53 | (-1.72-0.84)  | 4.28E-01        | 5.57E-01        | -0.19 | (-1.72-1.62)  | 8.24E-01        | 9.22E-01        | 2.97  | (-0.29-6.33)  | 7.46E-02        | 2.45E-01        | 2.09  | (-2.17-6.54)  | 3.39E-01        | 5.39E-01        |
| 411 | PE(18:0_22:6)        | -2.15 | (-3.01--1.18) | <b>5.23E-05</b> | <b>1.81E-04</b> | -0.65 | (-1.96-0.87)  | 3.78E-01        | 5.75E-01        | 5.09  | (1.50-8.81)   | <b>5.41E-03</b> | <b>4.82E-02</b> | 1.93  | (-2.24-6.29)  | 3.66E-01        | 5.64E-01        |
| 412 | PE(40:7)             | -1.27 | (-2.08--0.38) | <b>6.54E-03</b> | <b>1.58E-02</b> | -1.18 | (-2.25-0.04)  | 5.83E-02        | 1.51E-01        | -0.15 | (-3.95-3.80)  | 9.40E-01        | 9.79E-01        | -2.69 | (-6.91-1.73)  | 2.28E-01        | 4.25E-01        |
| 413 | PE(O-34:1)           | 0.79  | (-0.74-2.57)  | 3.30E-01        | 4.63E-01        | -0.03 | (-1.61-1.85)  | 9.72E-01        | 9.87E-01        | -1.06 | (-3.39-1.34)  | 3.81E-01        | 6.53E-01        | -1.66 | (-4.16-0.90)  | 2.00E-01        | 3.86E-01        |
| 414 | PE(O-16:0/18:2)      | 0.71  | (-1.89-4.14)  | 6.29E-01        | 7.25E-01        | -1.25 | (-3.52-1.82)  | 3.82E-01        | 5.79E-01        | 0.01  | (-2.86-2.98)  | 9.92E-01        | 9.99E-01        | -0.32 | (-3.72-3.21)  | 8.56E-01        | 9.46E-01        |
| 415 | PE(O-18:1/18:2)      | 0.01  | (-1.19-1.38)  | 9.88E-01        | 9.94E-01        | 0.40  | (-1.06-2.09)  | 6.10E-01        | 7.83E-01        | -0.25 | (-2.78-2.35)  | 8.50E-01        | 9.40E-01        | -0.08 | (-3.36-3.31)  | 9.61E-01        | 9.77E-01        |
| 416 | PE(O-16:0/20:4)      | -0.90 | (-1.91-0.22)  | 1.11E-01        | 1.90E-01        | -0.59 | (-1.88-0.90)  | 4.14E-01        | 6.09E-01        | 0.96  | (-1.80-3.80)  | 4.96E-01        | 7.35E-01        | 1.90  | (-1.53-5.44)  | 2.79E-01        | 4.80E-01        |
| 417 | PE(O-36:5)           | 0.01  | (-0.91-1.01)  | 9.92E-01        | 9.94E-01        | -0.85 | (-1.81-0.21)  | 1.12E-01        | 2.46E-01        | 2.66  | (-0.91-6.35)  | 1.45E-01        | 3.62E-01        | 2.08  | (-2.32-6.67)  | 3.58E-01        | 5.55E-01        |
| 418 | PE(O-16:0/22:4)      | 0.38  | (-0.55-1.39)  | 4.38E-01        | 5.67E-01        | 0.93  | (-0.28-2.29)  | 1.38E-01        | 2.88E-01        | 0.12  | (-2.09-2.37)  | 9.17E-01        | 9.69E-01        | 1.03  | (-1.48-3.61)  | 4.21E-01        | 6.04E-01        |
| 419 | PE(O-18:0/20:4)      | -0.07 | (-1.13-1.12)  | 9.01E-01        | 9.42E-01        | -0.18 | (-1.33-1.12)  | 7.72E-01        | 8.89E-01        | 0.55  | (-2.54-3.75)  | 7.29E-01        | 8.86E-01        | 0.47  | (-3.42-4.52)  | 8.14E-01        | 9.17E-01        |
| 420 | PE(O-38:5) (a)       | -0.22 | (-1.04-0.68)  | 6.21E-01        | 7.22E-01        | 0.18  | (-0.97-1.48)  | 7.67E-01        | 8.85E-01        | 1.87  | (-1.06-4.88)  | 2.11E-01        | 4.61E-01        | 1.50  | (-2.01-5.14)  | 4.05E-01        | 5.96E-01        |
| 421 | PE(O-38:5) (b)       | 0.13  | (-1.02-1.42)  | 8.35E-01        | 8.90E-01        | 0.33  | (-1.14-2.03)  | 6.80E-01        | 8.36E-01        | 0.01  | (-2.45-2.53)  | 9.96E-01        | 9.99E-01        | 1.01  | (-2.04-4.14)  | 5.18E-01        | 6.99E-01        |
| 422 | PE(O-16:0/22:6)      | 0.42  | (-0.58-1.53)  | 4.23E-01        | 5.55E-01        | 0.75  | (-0.45-2.09)  | 2.29E-01        | 4.13E-01        | 0.63  | (-1.70-3.02)  | 5.96E-01        | 8.10E-01        | 1.25  | (-1.57-4.14)  | 3.87E-01        | 5.75E-01        |
| 423 | PE(O-18:0/22:6)      | 0.07  | (-0.76-0.97)  | 8.76E-01        | 9.20E-01        | -0.08 | (-1.02-0.96)  | 8.72E-01        | 9.49E-01        | -0.06 | (-2.41-2.36)  | 9.63E-01        | 9.89E-01        | 0.11  | (-2.69-2.99)  | 9.37E-01        | 9.75E-01        |
| 424 | PE(O-18:1/22:6)      | 0.14  | (-0.60-0.95)  | 7.11E-01        | 7.81E-01        | -0.02 | (-0.89-0.93)  | 9.60E-01        | 9.85E-01        | 0.35  | (-2.00-2.75)  | 7.74E-01        | 9.15E-01        | 0.88  | (-2.07-3.92)  | 5.59E-01        | 7.30E-01        |
| 425 | PE(P-16:0/18:1)      | 1.66  | (0.80-2.59)   | <b>1.05E-04</b> | <b>3.49E-04</b> | 1.93  | (0.75-3.24)   | <b>9.42E-04</b> | <b>4.66E-03</b> | 0.01  | (-1.84-1.90)  | 9.89E-01        | 9.99E-01        | 0.14  | (-2.05-2.39)  | 8.99E-01        | 9.70E-01        |
| 426 | PE(P-16:0/18:2)      | -0.25 | (-1.28-0.91)  | 6.61E-01        | 7.44E-01        | 1.02  | (-0.50-2.78)  | 1.98E-01        | 3.76E-01        | 0.74  | (-1.96-3.52)  | 5.93E-01        | 8.10E-01        | 0.95  | (-1.86-3.85)  | 5.09E-01        | 6.94E-01        |
| 427 | PE(P-16:0/20:3)      | 0.50  | (-0.57-1.70)  | 3.73E-01        | 5.01E-01        | -0.19 | (-1.48-1.30)  | 7.89E-01        | 9.01E-01        | 3.59  | (1.12-6.12)   | <b>4.43E-03</b> | <b>4.82E-02</b> | 5.78  | (2.90-8.75)   | <b>9.29E-05</b> | <b>5.07E-03</b> |
| 428 | PE(P-16:0/20:4)      | -0.26 | (-1.20-0.79)  | 6.16E-01        | 7.18E-01        | 0.05  | (-1.18-1.44)  | 9.44E-01        | 9.77E-01        | 3.59  | (0.88-6.37)   | <b>9.38E-03</b> | 6.43E-02        | 3.85  | (0.58-7.23)   | <b>2.10E-02</b> | 1.05E-01        |
| 429 | PE(P-16:0/20:5)      | -1.60 | (-3.57-0.99)  | 2.03E-01        | 3.16E-01        | 0.39  | (-2.49-4.38)  | 8.17E-01        | 9.20E-01        | 4.73  | (0.09-9.58)   | <b>4.55E-02</b> | 1.95E-01        | 6.37  | (0.53-12.55)  | <b>3.23E-02</b> | 1.31E-01        |
| 430 | PE(P-16:0/22:4)      | 0.00  | (-0.85-0.92)  | 9.94E-01        | 9.94E-01        | 0.64  | (-0.55-1.99)  | 3.04E-01        | 4.98E-01        | -0.42 | (-2.25-1.44)  | 6.51E-01        | 8.54E-01        | -0.13 | (-2.28-2.06)  | 9.06E-01        | 9.71E-01        |
| 431 | PE(P-16:0/22:5) (n3) | -0.80 | (-1.66-0.16)  | 1.00E-01        | 1.74E-01        | 0.02  | (-1.17-1.37)  | 9.77E-01        | 9.89E-01        | 1.33  | (-1.08-3.79)  | 2.80E-01        | 5.49E-01        | 1.88  | (-0.66-4.48)  | 1.48E-01        | 3.30E-01        |
| 432 | PE(P-16:0/22:5) (n6) | 0.83  | (-0.20-1.97)  | 1.17E-01        | 1.98E-01        | 1.20  | (-0.11-2.67)  | 7.31E-02        | 1.75E-01        | 0.48  | (-1.92-2.93)  | 6.99E-01        | 8.78E-01        | 0.38  | (-2.79-3.64)  | 8.17E-01        | 9.18E-01        |
| 433 | PE(P-16:0/22:6)      | 0.10  | (-0.76-1.03)  | 8.33E-01        | 8.90E-01        | 0.33  | (-0.73-1.51)  | 5.59E-01        | 7.37E-01        | 1.78  | (-0.26-3.87)  | 8.76E-02        | 2.66E-01        | 2.09  | (-0.51-4.76)  | 1.16E-01        | 2.80E-01        |
| 434 | PE(P-17:0/20:4) (a)  | 0.00  | (-0.79-0.85)  | 9.93E-01        | 9.94E-01        | -0.81 | (-1.69-0.16)  | 9.79E-02        | 2.23E-01        | 1.04  | (-1.91-4.07)  | 4.92E-01        | 7.35E-01        | 2.47  | (-1.39-6.47)  | 2.11E-01        | 4.01E-01        |
| 435 | PE(P-17:0/20:4) (b)  | -0.88 | (-1.67--0.01) | <b>4.77E-02</b> | 9.16E-02        | -0.93 | (-1.87-0.13)  | 8.27E-02        | 1.92E-01        | 0.60  | (-2.14-3.41)  | 6.71E-01        | 8.54E-01        | 2.56  | (-0.82-6.05)  | 1.38E-01        | 3.14E-01        |
| 436 | PE(P-17:0/22:6) (a)  | 0.21  | (-0.82-1.35)  | 7.04E-01        | 7.75E-01        | -0.67 | (-1.78-0.59)  | 2.81E-01        | 4.75E-01        | -0.06 | (-2.93-2.91)  | 9.70E-01        | 9.93E-01        | 0.58  | (-3.42-4.74)  | 7.79E-01        | 8.97E-01        |
| 437 | PE(P-17:0/22:6) (b)  | -0.45 | (-1.31-0.49)  | 3.35E-01        | 4.66E-01        | -0.44 | (-1.45-0.70)  | 4.35E-01        | 6.27E-01        | -0.78 | (-3.27-1.78)  | 5.45E-01        | 7.79E-01        | 0.75  | (-2.50-4.11)  | 6.53E-01        | 8.08E-01        |
| 438 | PE(P-18:0/18:1)      | 1.12  | (0.18-2.15)   | <b>1.87E-02</b> | <b>3.97E-02</b> | 0.90  | (-0.38-2.35)  | 1.74E-01        | 3.43E-01        | -0.49 | (-2.61-1.68)  | 6.54E-01        | 8.54E-01        | -0.45 | (-2.80-1.96)  | 7.13E-01        | 8.49E-01        |
| 439 | PE(P-18:0/18:2)      | -0.21 | (-1.33-1.07)  | 7.39E-01        | 8.04E-01        | 0.01  | (-1.27-1.48)  | 9.87E-01        | 9.94E-01        | 0.06  | (-2.65-2.85)  | 9.65E-01        | 9.90E-01        | -1.23 | (-3.78-1.38)  | 3.49E-01        | 5.44E-01        |
| 440 | PE(P-18:0/20:3)      | -0.23 | (-0.93-0.53)  | 5.41E-01        | 6.61E-01        | -0.36 | (-1.26-0.65)  | 4.71E-01        | 6.59E-01        | 2.17  | (0.07-4.32)   | <b>4.30E-02</b> | 1.90E-01        | 2.87  | (0.42-5.38)   | <b>2.15E-02</b> | 1.06E-01        |
| 441 | PE(P-18:0/20:4)      | -0.94 | (-1.74--0.05) | <b>3.86E-02</b> | 7.57E-02        | -0.04 | (-1.20-1.26)  | 9.44E-01        | 9.77E-01        | 1.77  | (-0.98-4.60)  | 2.08E-01        | 4.58E-01        | 1.93  | (-1.25-5.22)  | 2.34E-01        | 4.31E-01        |
| 442 | PE(P-18:0/20:5)      | -1.78 | (-3.49-0.38)  | 9.86E-02        | 1.73E-01        | -2.61 | (-4.50--0.08) | <b>4.40E-02</b> | 1.19E-01        | 3.74  | (-0.66-8.34)  | 9.63E-02        | 2.80E-01        | 4.66  | (-1.03-10.67) | 1.10E-01        | 2.72E-01        |
| 443 | PE(P-18:0/22:4)      | -0.27 | (-1.20-0.77)  | 5.97E-01        | 7.05E-01        | -0.11 | (-1.36-1.32)  | 8.71E-01        | 9.49E-01        | -2.03 | (-3.90--0.13) | <b>3.69E-02</b> | 1.64E-01        | -1.02 | (-3.10-1.11)  | 3.44E-01        | 5.41E-01        |
| 444 | PE(P-18:0/22:5) (n3) | -0.49 | (-1.25-0.33)  | 2.35E-01        | 3.53E-01        | -0.16 | (-1.14-0.93)  | 7.63E-01        | 8.85E-01        | 0.33  | (-1.82-2.53)  | 7.64E-01        | 9.12E-01        | 1.53  | (-0.94-4.05)  | 2.25E-01        | 4.23E-01        |
| 445 | PE(P-18:0/22:5) (n6) | 0.64  | (-0.18-1.54)  | 1.30E-01        | 2.18E-01        | 0.04  | (-0.93-1.12)  | 9.35E-01        | 9.74E-01        | -0.23 | (-2.75-2.35)  | 8.59E-01        | 9.40E-01        | -0.79 | (-3.81-2.33)  | 6.15E-01        | 7.74E-01        |
| 446 | PE(P-18:0/22:6)      | -0.15 | (-0.92-0.69)  | 7.20E-01        | 7.86E-01        | 0.22  | (-0.84-1.40)  | 7.02E-01        | 8.47E-01        | 0.34  | (-1.95-2.69)  | 7.70E-01        | 9.12E-01        | -0.12 | (-3.02-2.87)  | 9.37E-01        | 9.75E-01        |
| 447 | PE(P-18:1/18:1)      | 0.19  | (-0.59-1.03)  | 6.40E-01        | 7.32E-01        | 0.64  | (-0.37-1.75)  | 2.22E-01        | 4.08E-01        | -0.33 | (-2.23-1.61)  | 7.35E-01        | 8.86E-01        | -0.08 | (-2.25-2.14)  | 9.45E-01        | 9.75E-01        |
| 448 | PE(P-18:1/18:2)      | -0.56 | (-2.03-1.17)  | 4.98E-01        | 6.23E-01        | -0.93 | (-2.49-0.94)  | 3.05E-01        | 4.98E-01        | 0.13  | (-2.62-2.96)  | 9.25E-01        | 9.71E-01        | -1.32 | (-4.23-1.68)  | 3.83E-01        | 5.75E-01        |
| 449 | PE(P-18:1/20:4)      | -0.39 | (-1.23-0.53)  | 3.93E-01        | 5.24E-01        | -0.65 | (-1.76-0.61)  | 2.95E-01        | 4.89E-01        | 2.07  | (-0.63-4.85)  | 1.33E-01        | 3.48E-01        | 2.43  | (-0.92-5.90)  | 1.56E-01        | 3.40E-01        |
| 450 | PE(P-18:1/20:5)      | -0.76 | (-3.25-2.65)  | 6.22E-01        | 7.22E-01        | -0.79 | (-3.72-3.50)  | 6.71E-01        | 8.33E-01        | 3.61  | (-1.12-8.58)  | 1.36E-01        | 3.49E-01        | 5.56  | (-0.22-11.68) | 5.93E-02        | 1.87E-01        |
| 451 | PE(P-18:1/22:4)      | 0.36  | (-0.76-1.62)  | 5.42E-01        | 6.61E-01        | 0.50  | (-0.91-2.14)  | 5.05E-01        | 6.90E-01        | -1.12 | (-3.01-0.81)  | 2.51E-01        | 5.11E-01        | -0.94 | (-3.14-1.31)  | 4.08E-01        | 5.97E-01        |
| 452 | PE(P-18:1/22:5) (a)  | -0.78 | (-1.53-0.04)  | 6.26E-02        | 1.17E-01        | 0.34  | (-0.73-1.54)  | 5.51E-01        | 7.36E-01        | 0.91  | (-1.26-3.13)  | 4.11E-01        | 6.75E-01        | 1.77  | (-1.11-4.73)  | 2.30E-01        | 4.27E-01        |
| 453 | PE(P-18:1/22:6) (a)  | -0.06 | (-0.93-0.90)  | 9.03E-01        | 9.42E-01        | -0.06 | (-1.11-1.12)  | 9.21E-01        | 9.70E-01        | 1.17  | (-1.22-3.62)  | 3.36E-01        | 6.14E-01        | 0.93  | (-2.13-4.09)  | 5.52E-01        | 7.24E-01        |

|     |                    |       |               |                 |                 |       |               |                 |                 |       |               |                 |                 |       |               |                 |                 |
|-----|--------------------|-------|---------------|-----------------|-----------------|-------|---------------|-----------------|-----------------|-------|---------------|-----------------|-----------------|-------|---------------|-----------------|-----------------|
| 454 | PE(P-20:0/18:1)    | 0.93  | (-1.24- 3.64) | 4.28E-01        | 5.57E-01        | 0.11  | (-2.22- 3.14) | 9.36E-01        | 9.74E-01        | -0.45 | (-2.94- 2.10) | 7.24E-01        | 8.86E-01        | -2.01 | (-4.37- 0.42) | 1.03E-01        | 2.64E-01        |
| 455 | PE(P-20:0/18:2)    | 0.18  | (-0.40- 0.80) | 5.41E-01        | 6.61E-01        | -0.35 | (-0.99- 0.34) | 3.14E-01        | 5.08E-01        | -2.04 | (-4.27- 0.24) | 7.90E-02        | 2.50E-01        | -3.60 | (-5.89--1.25) | <b>3.06E-03</b> | <b>3.26E-02</b> |
| 456 | PE(P-20:0/20:4)    | -0.37 | (-1.48- 0.88) | 5.46E-01        | 6.63E-01        | -0.76 | (-2.09- 0.78) | 3.14E-01        | 5.08E-01        | 0.02  | (-2.11- 2.19) | 9.85E-01        | 9.99E-01        | -0.42 | (-2.89- 2.11) | 7.43E-01        | 8.69E-01        |
| 457 | PE(P-20:0/22:6)    | -0.58 | (-1.31- 0.21) | 1.46E-01        | 2.41E-01        | -0.75 | (-1.60- 0.19) | 1.14E-01        | 2.46E-01        | -0.94 | (-2.82- 0.98) | 3.33E-01        | 6.14E-01        | -2.82 | (-5.23--0.34) | <b>2.62E-02</b> | 1.18E-01        |
| 458 | PE(P-20:1/20:4)    | -0.65 | (-1.86- 0.75) | 3.44E-01        | 4.74E-01        | -0.72 | (-2.42- 1.35) | 4.65E-01        | 6.55E-01        | 1.61  | (-1.14- 4.43) | 2.53E-01        | 5.13E-01        | 0.42  | (-3.19- 4.17) | 8.21E-01        | 9.21E-01        |
| 459 | PG(34:2)           | -1.94 | (-3.27--0.34) | <b>2.00E-02</b> | <b>4.21E-02</b> | 1.64  | (-0.60- 4.42) | 1.64E-01        | 3.31E-01        | 1.09  | (-2.53- 4.83) | 5.59E-01        | 7.88E-01        | 3.09  | (-1.33- 7.70) | 1.72E-01        | 3.57E-01        |
| 460 | PG(36:1)           | -1.48 | (-2.82- 0.11) | 6.66E-02        | 1.23E-01        | -1.21 | (-3.06- 1.12) | 2.82E-01        | 4.75E-01        | 1.93  | (-1.44- 5.41) | 2.63E-01        | 5.28E-01        | 3.92  | (-0.38- 8.40) | 7.44E-02        | 2.11E-01        |
| 461 | PI(16:0/16:0)      | -0.39 | (-1.45- 0.82) | 5.12E-01        | 6.35E-01        | 0.49  | (-1.14- 2.43) | 5.76E-01        | 7.52E-01        | 3.35  | (-0.03- 6.83) | 5.17E-02        | 2.08E-01        | 2.54  | (-1.69- 6.94) | 2.42E-01        | 4.32E-01        |
| 462 | PI(16:0_16:1)      | 0.67  | (-0.36- 1.82) | 2.09E-01        | 3.23E-01        | 0.86  | (-0.50- 2.41) | 2.25E-01        | 4.09E-01        | 8.10  | ( 4.43-11.90) | <b>1.52E-05</b> | <b>2.43E-03</b> | 9.16  | ( 4.55-13.96) | <b>9.51E-05</b> | <b>5.07E-03</b> |
| 463 | PI(34:0)           | -1.69 | (-3.19- 0.12) | 6.60E-02        | 1.23E-01        | -2.02 | (-3.70- 0.11) | 6.18E-02        | 1.56E-01        | 1.71  | (-2.41- 5.99) | 4.19E-01        | 6.78E-01        | -2.77 | (-7.20- 1.87) | 2.36E-01        | 4.31E-01        |
| 464 | PI(34:1)           | -0.15 | (-0.92- 0.69) | 7.20E-01        | 7.86E-01        | -0.23 | (-1.24- 0.89) | 6.73E-01        | 8.33E-01        | 0.34  | (-2.02- 2.76) | 7.78E-01        | 9.16E-01        | 0.56  | (-2.48- 3.69) | 7.21E-01        | 8.50E-01        |
| 465 | PI(17:0_18:1)      | -1.02 | (-2.19- 0.33) | 1.31E-01        | 2.18E-01        | -1.70 | (-3.22- 0.15) | 6.97E-02        | 1.71E-01        | -1.17 | (-3.90- 1.63) | 4.06E-01        | 6.75E-01        | -0.41 | (-4.02- 3.34) | 8.27E-01        | 9.21E-01        |
| 466 | PI(17:0_18:2)      | -2.29 | (-3.38--1.03) | <b>8.51E-04</b> | <b>2.37E-03</b> | -1.03 | (-2.76- 1.10) | 3.16E-01        | 5.08E-01        | 0.58  | (-2.09- 3.34) | 6.71E-01        | 8.54E-01        | -0.59 | (-3.65- 2.57) | 7.09E-01        | 8.49E-01        |
| 467 | PI(18:0_18:1)      | -1.36 | (-2.17--0.46) | <b>4.04E-03</b> | <b>1.02E-02</b> | -0.99 | (-2.08- 0.24) | 1.10E-01        | 2.42E-01        | -2.06 | (-4.76- 0.71) | 1.43E-01        | 3.60E-01        | -1.79 | (-5.23- 1.78) | 3.19E-01        | 5.17E-01        |
| 468 | PI(36:2)           | -1.48 | (-2.19--0.71) | <b>3.09E-04</b> | <b>9.28E-04</b> | -0.79 | (-1.70- 0.23) | 1.26E-01        | 2.69E-01        | -1.43 | (-3.58- 0.77) | 2.01E-01        | 4.48E-01        | -1.68 | (-4.10- 0.80) | 1.81E-01        | 3.68E-01        |
| 469 | PI(18:1_18:2)      | -1.40 | (-2.07--0.67) | <b>2.93E-04</b> | <b>8.89E-04</b> | -1.51 | (-2.29--0.65) | <b>9.89E-04</b> | <b>4.85E-03</b> | -3.25 | (-5.48--0.96) | <b>5.81E-03</b> | <b>4.98E-02</b> | -3.22 | (-6.17--0.17) | <b>3.86E-02</b> | 1.47E-01        |
| 470 | PI(16:0_20:3) (a)  | 0.08  | (-0.59- 0.78) | 8.27E-01        | 8.88E-01        | 0.57  | (-0.33- 1.56) | 2.20E-01        | 4.08E-01        | -0.18 | (-2.18- 1.86) | 8.60E-01        | 9.40E-01        | 0.42  | (-2.53- 3.46) | 7.81E-01        | 8.97E-01        |
| 471 | PI(16:0_20:3) (b)  | 3.31  | ( 1.88- 4.92) | <b>1.16E-06</b> | <b>4.74E-06</b> | 2.73  | ( 1.18- 4.48) | <b>2.82E-04</b> | <b>1.88E-03</b> | -0.43 | (-2.81- 2.02) | 7.29E-01        | 8.86E-01        | 2.82  | (-0.48- 6.22) | 9.39E-02        | 2.49E-01        |
| 472 | PI(16:0_20:4)      | -0.09 | (-0.75- 0.63) | 8.04E-01        | 8.65E-01        | 0.52  | (-0.40- 1.51) | 2.77E-01        | 4.73E-01        | 0.95  | (-1.10- 3.03) | 3.65E-01        | 6.37E-01        | 2.24  | (-0.68- 5.23) | 1.32E-01        | 3.06E-01        |
| 473 | PI(18:0_20:2)      | 3.06  | ( 1.34- 5.04) | <b>2.33E-04</b> | <b>7.25E-04</b> | 1.63  | (-0.16- 3.76) | 7.72E-02        | 1.82E-01        | -3.21 | (-5.66--0.70) | <b>1.28E-02</b> | 7.41E-02        | -1.07 | (-4.23- 2.20) | 5.15E-01        | 6.98E-01        |
| 474 | PI(18:0_20:3) (a)  | -0.40 | (-0.97- 0.20) | 1.87E-01        | 2.95E-01        | 0.00  | (-0.81- 0.87) | 9.93E-01        | 9.97E-01        | -1.35 | (-3.12- 0.45) | 1.39E-01        | 3.52E-01        | -0.37 | (-2.42- 1.73) | 7.28E-01        | 8.57E-01        |
| 475 | PI(18:0_20:4)      | -0.73 | (-1.25--0.17) | <b>1.08E-02</b> | <b>2.42E-02</b> | -0.31 | (-1.02- 0.47) | 4.28E-01        | 6.22E-01        | -1.81 | (-3.59- 0.00) | 5.03E-02        | 2.05E-01        | 0.04  | (-2.13- 2.25) | 9.73E-01        | 9.85E-01        |
| 476 | PI(38:5) (a)       | -0.06 | (-0.87- 0.82) | 8.84E-01        | 9.27E-01        | -1.22 | (-2.02--0.34) | <b>7.69E-03</b> | <b>2.83E-02</b> | -1.78 | (-3.60- 0.08) | 6.07E-02        | 2.20E-01        | 0.38  | (-2.04- 2.86) | 7.58E-01        | 8.85E-01        |
| 477 | PI(38:6)           | -1.14 | (-1.80--0.42) | <b>2.42E-03</b> | <b>6.43E-03</b> | -0.49 | (-1.33- 0.44) | 2.92E-01        | 4.89E-01        | 0.21  | (-1.99- 2.46) | 8.54E-01        | 9.40E-01        | -0.66 | (-3.33- 2.08) | 6.31E-01        | 7.89E-01        |
| 478 | PI(18:0_22:4)      | 1.38  | ( 0.50- 2.34) | <b>1.81E-03</b> | <b>4.87E-03</b> | 1.01  | (-0.05- 2.18) | 6.34E-02        | 1.59E-01        | -0.76 | (-2.93- 1.45) | 4.94E-01        | 7.35E-01        | -0.75 | (-3.46- 2.04) | 5.93E-01        | 7.59E-01        |
| 479 | PI(18:0_22:5) (n3) | -1.48 | (-2.27--0.61) | <b>1.28E-03</b> | <b>3.52E-03</b> | -0.73 | (-1.79- 0.47) | 2.22E-01        | 4.08E-01        | 0.11  | (-2.14- 2.41) | 9.25E-01        | 9.71E-01        | 1.75  | (-1.21- 4.81) | 2.48E-01        | 4.40E-01        |
| 480 | PI(18:0_22:6)      | -1.27 | (-1.93--0.56) | <b>6.94E-04</b> | <b>2.00E-03</b> | -0.74 | (-1.60- 0.21) | 1.22E-01        | 2.61E-01        | 0.19  | (-2.12- 2.56) | 8.70E-01        | 9.45E-01        | -0.59 | (-3.61- 2.52) | 7.04E-01        | 8.48E-01        |

**Table S5.** Association studies with pre-pregnancy BMI and birth weight in Barwon Infant Study (BIS) and the meta-analysis results (GUSTO and BIS). Related to Figure 4.

| Lipid Species | BIS - ppBMI (antenatal)                                                                    |               |                 |                 | Comparison between GUSTO and BIS | Meta Analysis of ppBMI study (GUSTO and BIS)                                                                       |                 |                     |                                              | BIS - Birth Weight (cord blood) |               |                 |                               | Comparison between GUSTO and BIS | Meta Analysis of BW study (GUSTO and BIS) |                     |                 |                 |
|---------------|--------------------------------------------------------------------------------------------|---------------|-----------------|-----------------|----------------------------------|--------------------------------------------------------------------------------------------------------------------|-----------------|---------------------|----------------------------------------------|---------------------------------|---------------|-----------------|-------------------------------|----------------------------------|-------------------------------------------|---------------------|-----------------|-----------------|
|               | adjusted for ethnicity, maternal age, maternal education level and gestational weight gain |               |                 |                 |                                  | adjusted for sex, ethnicity, maternal age, maternal education level, pre-pregnancy BMI, gestational age and parity |                 |                     |                                              |                                 |               |                 |                               |                                  |                                           |                     |                 |                 |
|               | %change in lipid concentration per unit BMI                                                | 95%CI         | p-value         | p-value(BH)     | Overall effect size (%change)    | Overall 95%CI                                                                                                      | Overall p-value | Overall p-value(BH) | %change in lipid concentration per 100 grams | 95%CI                           | p-value       | p-value(BH)     | Overall Effect Size (%change) | Overall 95%CI                    | Overall p-value                           | Overall p-value(BH) |                 |                 |
| AC(12:0)      | 3.36                                                                                       | (1.75-4.99)   | <b>4.02E-05</b> | <b>2.06E-04</b> | BIS only                         | 1.23                                                                                                               | (0.34-2.11)     | <b>6.89E-03</b>     | <b>1.11E-02</b>                              | -1.93                           | (-2.73--1.13) | <b>2.89E-06</b> | <b>1.63E-05</b>               | GUSTO and BIS                    | -1.69                                     | (-2.17--1.21)       | <b>6.51E-12</b> | <b>2.70E-11</b> |
| AC(13:0)      | 1.81                                                                                       | (0.09-3.56)   | <b>3.97E-02</b> | 7.21E-02        | notSig                           | 1.51                                                                                                               | (0.45-2.57)     | <b>5.44E-03</b>     | <b>9.06E-03</b>                              | -1.04                           | (-1.89--0.2)  | <b>1.59E-02</b> | <b>3.46E-02</b>               | BIS only                         | -1.09                                     | (-1.76--0.41)       | <b>1.66E-03</b> | <b>3.23E-03</b> |
| AC(14:0)      | 1.10                                                                                       | (0.07-2.14)   | <b>3.63E-02</b> | 6.69E-02        | notSig                           | 0.57                                                                                                               | (-0.01-1.15)    | 5.28E-02            | 7.22E-02                                     | -1.47                           | (-2.33--0.61) | <b>8.38E-04</b> | <b>2.64E-03</b>               | GUSTO and BIS                    | -1.17                                     | (-1.65--0.68)       | <b>2.12E-06</b> | <b>5.68E-06</b> |
| AC(14:1)      | 5.56                                                                                       | (3.78-7.37)   | <b>7.46E-10</b> | <b>2.16E-08</b> | GUSTO and BIS                    | 2.62                                                                                                               | (1.64-3.6)      | <b>1.57E-07</b>     | <b>6.30E-07</b>                              | -1.48                           | (-2.34--0.63) | <b>7.02E-04</b> | <b>2.25E-03</b>               | GUSTO and BIS                    | -1.23                                     | (-1.77--0.7)        | <b>5.89E-06</b> | <b>1.52E-05</b> |
| AC(14:2)      | 4.48                                                                                       | (2.74-6.25)   | <b>3.73E-07</b> | <b>3.93E-06</b> | BIS only                         | 2.02                                                                                                               | (1.08-2.96)     | <b>2.51E-05</b>     | <b>6.69E-05</b>                              | -1.38                           | (-2.05--0.71) | <b>5.56E-05</b> | <b>2.26E-04</b>               | GUSTO and BIS                    | -1.13                                     | (-1.56--0.69)       | <b>3.41E-07</b> | <b>9.70E-07</b> |
| AC(16:0)      | 1.08                                                                                       | (0.31-1.85)   | <b>6.12E-03</b> | <b>1.49E-02</b> | BIS only                         | 0.56                                                                                                               | (0.13-0.99)     | <b>1.07E-02</b>     | <b>1.66E-02</b>                              | -0.36                           | (-0.98-0.27)  | 2.63E-01        | 3.63E-01                      | notSig                           | -0.42                                     | (-0.83--0.01)       | <b>4.43E-02</b> | 6.64E-02        |
| AC(16:1)      | 3.86                                                                                       | (2.73-5)      | <b>2.01E-11</b> | <b>1.87E-09</b> | GUSTO and BIS                    | 2.12                                                                                                               | (1.45-2.78)     | <b>5.13E-10</b>     | <b>2.94E-09</b>                              | -1.29                           | (-2.29--0.3)  | <b>1.08E-02</b> | <b>2.50E-02</b>               | GUSTO and BIS                    | -1.09                                     | (-1.65--0.54)       | <b>1.08E-04</b> | <b>2.49E-04</b> |
| AC(18:0)      | -0.02                                                                                      | (-0.89-0.85)  | 9.57E-01        | 9.66E-01        | notSig                           | -0.06                                                                                                              | (-0.51-0.39)    | 7.85E-01            | 8.17E-01                                     | -0.32                           | (-1.03-0.39)  | 3.76E-01        | 4.82E-01                      | GUSTO only                       | -0.62                                     | (-1.04--0.19)       | <b>4.54E-03</b> | <b>8.40E-03</b> |
| AC(18:1)      | 2.21                                                                                       | (1.23-3.21)   | <b>1.07E-05</b> | <b>6.72E-05</b> | GUSTO and BIS                    | 1.64                                                                                                               | (1.07-2.22)     | <b>1.74E-08</b>     | <b>7.98E-08</b>                              | -0.02                           | (-0.96-0.92)  | 9.62E-01        | 9.66E-01                      | notSig                           | 0.05                                      | (-0.51-0.62)        | 8.52E-01        | 8.86E-01        |
| AC(18:2)      | -0.10                                                                                      | (-0.96-0.78)  | 8.30E-01        | 8.71E-01        | GUSTO only                       | 0.58                                                                                                               | (0.04-1.11)     | <b>3.55E-02</b>     | <b>4.97E-02</b>                              | -0.86                           | (-1.83-0.12)  | 8.58E-02        | 1.42E-01                      | notSig                           | -0.55                                     | (-1.09--0.02)       | <b>4.16E-02</b> | 6.31E-02        |
| CE(14:0)      | -3.91                                                                                      | (-4.95--2.86) | <b>1.52E-12</b> | <b>3.69E-10</b> | GUSTO and BIS                    | -2.36                                                                                                              | (-2.84--1.87)   | <b>2.35E-21</b>     | <b>9.90E-20</b>                              | 0.46                            | (-0.09-1.02)  | 9.98E-02        | 1.62E-01                      | notSig                           | -0.04                                     | (-0.42-0.35)        | 8.54E-01        | 8.86E-01        |
| CE(16:1)      | -1.32                                                                                      | (-2.52--0.11) | <b>3.33E-02</b> | 6.31E-02        | GUSTO only                       | -1.13                                                                                                              | (-1.78--0.49)   | <b>6.00E-04</b>     | <b>1.16E-03</b>                              | 2.15                            | (1.5-2.81)    | <b>2.31E-10</b> | <b>2.75E-09</b>               | GUSTO and BIS                    | 1.59                                      | (1.12-2.07)         | <b>5.07E-11</b> | <b>1.88E-10</b> |
| CE(18:0)      | -0.68                                                                                      | (-1.39-0.05)  | 6.63E-02        | 1.13E-01        | GUSTO only                       | -0.97                                                                                                              | (-1.39--0.56)   | <b>4.91E-06</b>     | <b>1.44E-05</b>                              | 1.13                            | (0.4-1.85)    | <b>2.42E-03</b> | <b>6.75E-03</b>               | BIS only                         | 0.74                                      | (0.2-1.28)          | <b>7.07E-03</b> | <b>1.25E-02</b> |
| CE(18:1)      | -0.17                                                                                      | (-0.61-0.28)  | 4.52E-01        | 5.34E-01        | GUSTO only                       | -0.68                                                                                                              | (-0.93--0.43)   | <b>1.48E-07</b>     | <b>6.13E-07</b>                              | 0.94                            | (0.41-1.46)   | <b>4.81E-04</b> | <b>1.60E-03</b>               | BIS only                         | 0.48                                      | (0.14-0.81)         | <b>5.70E-03</b> | <b>1.03E-02</b> |
| CE(18:2)      | -0.53                                                                                      | (-0.92--0.15) | <b>6.72E-03</b> | <b>1.62E-02</b> | GUSTO and BIS                    | -0.70                                                                                                              | (-0.95--0.44)   | <b>1.33E-07</b>     | <b>5.65E-07</b>                              | 0.14                            | (-0.48-0.76)  | 6.58E-01        | 7.31E-01                      | notSig                           | -0.18                                     | (-0.58-0.21)        | 3.58E-01        | 4.15E-01        |
| CE(18:3)      | -4.43                                                                                      | (-5.6--3.24)  | <b>1.59E-12</b> | <b>3.69E-10</b> | GUSTO and BIS                    | -2.46                                                                                                              | (-3--1.91)      | <b>6.77E-19</b>     | <b>1.85E-17</b>                              | 2.20                            | (1.43-2.97)   | <b>2.92E-08</b> | <b>2.38E-07</b>               | BIS only                         | 1.40                                      | (0.81-1.98)         | <b>2.73E-06</b> | <b>7.24E-06</b> |
| CE(20:1)      | -0.30                                                                                      | (-0.98-0.38)  | 3.84E-01        | 4.73E-01        | GUSTO only                       | -0.67                                                                                                              | (-1.05--0.29)   | <b>5.79E-04</b>     | <b>1.13E-03</b>                              | 1.11                            | (0.33-1.9)    | <b>5.51E-03</b> | <b>1.42E-02</b>               | BIS only                         | 0.86                                      | (0.28-1.43)         | <b>3.60E-03</b> | <b>6.75E-03</b> |
| CE(20:2)      | -1.31                                                                                      | (-1.91--0.72) | <b>1.87E-05</b> | <b>1.08E-04</b> | GUSTO and BIS                    | -1.32                                                                                                              | (-1.66--0.98)   | <b>2.52E-14</b>     | <b>2.93E-13</b>                              | 1.17                            | (0.57-1.78)   | <b>1.47E-04</b> | <b>5.52E-04</b>               | GUSTO and BIS                    | 1.00                                      | (0.55-1.44)         | <b>1.04E-05</b> | <b>2.60E-05</b> |
| CE(20:4)      | -1.38                                                                                      | (-2.49--0.27) | <b>1.51E-02</b> | <b>3.24E-02</b> | BIS only                         | -0.84                                                                                                              | (-1.39--0.29)   | <b>2.95E-03</b>     | <b>5.14E-03</b>                              | 1.21                            | (0.43-1.98)   | <b>2.38E-03</b> | <b>6.68E-03</b>               | BIS only                         | 0.32                                      | (-0.14-0.79)        | 1.72E-01        | 2.22E-01        |
| CE(20:5)      | -2.86                                                                                      | (-4.45--1.24) | <b>6.17E-04</b> | <b>2.19E-03</b> | GUSTO and BIS                    | -2.18                                                                                                              | (-3.21--1.15)   | <b>3.28E-05</b>     | <b>8.36E-05</b>                              | 1.01                            | (-0.11-2.13)  | 7.69E-02        | 1.31E-01                      | GUSTO only                       | -0.82                                     | (-1.58--0.05)       | <b>3.66E-02</b> | 5.67E-02        |
| CE(22:5) (n6) | -2.13                                                                                      | (-3.07--1.17) | <b>1.65E-05</b> | <b>9.70E-05</b> | GUSTO and BIS                    | -1.95                                                                                                              | (-2.44--1.45)   | <b>1.99E-14</b>     | <b>2.44E-13</b>                              | 1.56                            | (0.94-2.17)   | <b>8.10E-07</b> | <b>5.01E-06</b>               | BIS only                         | 1.13                                      | (0.65-1.61)         | <b>4.76E-06</b> | <b>1.24E-05</b> |
| CE(22:6)      | -1.77                                                                                      | (-2.92--0.61) | <b>2.93E-03</b> | <b>8.08E-03</b> | GUSTO and BIS                    | -1.61                                                                                                              | (-2.22--1)      | <b>2.48E-07</b>     | <b>9.75E-07</b>                              | 0.14                            | (-0.48-0.76)  | 6.58E-01        | 7.31E-01                      | GUSTO only                       | -0.65                                     | (-1.14--0.15)       | <b>9.99E-03</b> | <b>1.71E-02</b> |
| CE(24:5)      | 0.29                                                                                       | (-0.71-1.3)   | 5.69E-01        | 6.48E-01        | GUSTO only                       | -1.24                                                                                                              | (-1.82--0.67)   | <b>2.48E-05</b>     | <b>6.69E-05</b>                              | -1.43                           | (-2.54--0.31) | <b>1.21E-02</b> | <b>2.75E-02</b>               | GUSTO and BIS                    | -2.34                                     | (-3.02--1.67)       | <b>1.14E-11</b> | <b>4.55E-11</b> |
| CE(24:6)      | -3.03                                                                                      | (-4.14--1.91) | <b>1.92E-07</b> | <b>2.41E-06</b> | GUSTO and BIS                    | -2.69                                                                                                              | (-3.3--2.08)    | <b>4.80E-18</b>     | <b>1.24E-16</b>                              | -0.37                           | (-1.22-0.47)  | 3.85E-01        | 4.90E-01                      | GUSTO only                       | -0.71                                     | (-1.34--0.08)       | <b>2.72E-02</b> | <b>4.35E-02</b> |
| DG(16:0_16:1) | 1.88                                                                                       | (0.13-3.66)   | <b>3.49E-02</b> | 6.55E-02        | notSig                           | 0.96                                                                                                               | (0.07-1.85)     | <b>3.54E-02</b>     | <b>4.97E-02</b>                              | -1.05                           | (-1.86--0.24) | <b>1.15E-02</b> | <b>2.65E-02</b>               | GUSTO and BIS                    | -1.18                                     | (-1.76--0.6)        | <b>6.52E-05</b> | <b>1.54E-04</b> |
| DG(14:0_18:2) | -1.79                                                                                      | (-3.27--0.29) | <b>1.99E-02</b> | <b>4.02E-02</b> | BIS only                         | -1.27                                                                                                              | (-2.1--0.43)    | <b>2.89E-03</b>     | <b>5.05E-03</b>                              | -2.05                           | (-3.02--1.08) | <b>3.47E-05</b> | <b>1.49E-04</b>               | GUSTO and BIS                    | -2.53                                     | (-3.23--1.82)       | <b>2.49E-12</b> | <b>1.06E-11</b> |
| DG(16:0_18:1) | 2.82                                                                                       | (1.49-4.16)   | <b>2.90E-05</b> | <b>1.57E-04</b> | GUSTO and BIS                    | 1.68                                                                                                               | (1.03-2.33)     | <b>3.83E-07</b>     | <b>1.42E-06</b>                              | -1.34                           | (-2.33--0.36) | <b>7.64E-03</b> | <b>1.88E-02</b>               | GUSTO and BIS                    | -1.72                                     | (-2.29--1.16)       | <b>2.38E-09</b> | <b>8.12E-09</b> |
| DG(16:1_18:1) | 3.07                                                                                       | (1.7-4.47)    | <b>1.09E-05</b> | <b>6.72E-05</b> | BIS only                         | 1.43                                                                                                               | (0.69-2.17)     | <b>1.38E-04</b>     | <b>3.16E-04</b>                              | -0.86                           | (-1.72--0.01) | <b>4.75E-02</b> | 9.00E-02                      | GUSTO only                       | -1.57                                     | (-2.12--1.01)       | <b>2.91E-08</b> | <b>8.99E-08</b> |
| DG(16:0_18:2) | 1.91                                                                                       | (0.58-3.25)   | <b>4.66E-03</b> | <b>1.21E-02</b> | GUSTO and BIS                    | 1.15                                                                                                               | (0.51-1.78)     | <b>3.88E-04</b>     | <b>7.93E-04</b>                              | -2.81                           | (-3.89--1.73) | <b>4.47E-07</b> | <b>3.01E-06</b>               | GUSTO and BIS                    | -2.99                                     | (-3.59--2.39)       | <b>1.76E-22</b> | <b>1.36E-21</b> |
| DG(18:0_18:1) | 2.39                                                                                       | (1.17-3.63)   | <b>1.27E-04</b> | <b>5.45E-04</b> | GUSTO and BIS                    | 1.60                                                                                                               | (1.01-2.19)     | <b>1.29E-07</b>     | <b>5.53E-07</b>                              | -0.66                           | (-1.5-0.18)   | 1.25E-01        | 1.95E-01                      | GUSTO only                       | -1.02                                     | (-1.57--0.47)       | <b>2.89E-04</b> | <b>6.35E-04</b> |
| DG(18:1_18:1) | 3.44                                                                                       | (2.11-4.79)   | <b>3.65E-07</b> | <b>3.93E-06</b> | GUSTO and BIS                    | 1.84                                                                                                               | (1.2-2.48)      | <b>1.70E-08</b>     | <b>7.89E-08</b>                              | -0.91                           | (-1.93-0.11)  | 8.07E-02        | 1.35E-01                      | GUSTO only                       | -1.57                                     | (-2.13--1.01)       | <b>3.94E-08</b> | <b>1.20E-07</b> |
| DG(18:0_18:2) | 1.65                                                                                       | (0.26-3.06)   | <b>1.98E-02</b> | <b>4.01E-02</b> | GUSTO and BIS                    | 1.14                                                                                                               | (0.47-1.81)     | <b>8.15E-04</b>     | <b>1.54E-03</b>                              | -1.86                           | (-2.84--0.87) | <b>2.22E-04</b> | <b>8.05E-04</b>               | GUSTO and BIS                    | -1.74                                     | (-2.42--1.05)       | <b>7.02E-07</b> | <b>1.93E-06</b> |
| DG(18:1_18:2) | 2.55                                                                                       | (1.26-3.86)   | <b>1.00E-04</b> | <b>4.47E-04</b> | GUSTO and BIS                    | 1.33                                                                                                               | (0.7-1.97)      | <b>3.83E-05</b>     | <b>9.51E-05</b>                              | -2.31                           | (-3.35--1.27) | <b>1.45E-05</b> | <b>6.95E-05</b>               | GUSTO and BIS                    | -2.92                                     | (-3.47--2.37)       | <b>9.92E-26</b> | <b>9.21E-25</b> |
| DG(18:2_18:2) | 1.55                                                                                       | (-0.09-3.22)  | 6.41E-02        | 1.11E-01        | notSig                           | 1.04                                                                                                               | (0.23-1.86)     | <b>1.19E-02</b>     | <b>1.84E-02</b>                              | -3.01                           | (-4.18--1.84) | <b>5.35E-07</b> | <b>3.54E-06</b>               | GUSTO and BIS                    | -3.84                                     | (-4.46--3.23)       | <b>1.99E-34</b> | <b>2.98E-33</b> |
| DG(18:1_18:3) | 0.76                                                                                       | (-0.53-2.06)  | 2.50E-01        | 3.37E-01        | notSig                           | 0.47                                                                                                               | (-0.2-1.14)     | 1.67E-01            | 2.06E-01                                     | -1.91                           | (-2.84--0.98) | <b>6.56E-05</b> | <b>2.65E-04</b>               | GUSTO and BIS                    | -2.32                                     | (-2.93--1.71)       | <b>1.08E-13</b> | <b>5.07E-13</b> |
| DG(16:0_20:4) | 2.13                                                                                       | (0.73-3.55)   | <b>2.73E-03</b> | <b>7.58E-03</b> | GUSTO and BIS                    | 1.47                                                                                                               | (0.7-2.25)      | <b>2.00E-04</b>     | <b>4.39E-04</b>                              | -2.23                           | (-3.31--1.16) | <b>5.00E-05</b> | <b>2.07E-04</b>               | GUSTO and BIS                    | -2.12                                     | (-2.77--1.48)       | <b>1.10E-10</b> | <b>3.94E-10</b> |
| DG(18:1_20:3) | 1.68                                                                                       | (0.53-2.84)   | <b>4.11E-03</b> | <b>1.09E-02</b> | BIS only                         | 0.80                                                                                                               | (0.17-1.44)     | <b>1.29E-02</b>     | <b>1.96E-02</b>                              | 0.37                            | (-0.43-1.17)  | 3.59E-01        | 4.65E-01                      | notSig                           | 0.04                                      | (-0.53-0.61)        | 8.84E-01        | 9.07E-01        |
| DG(18:1_20:4) | 3.07                                                                                       | (1.99-4.16)   | <b>2.60E-08</b> | <b>4.17E-07</b> | GUSTO and BIS                    | 1.75                                                                                                               | (1.14-2.36)     | <b>2.01E-08</b>     | <b>9.07E-08</b>                              | -1.70                           | (-2.54--0.86) | <b>7.91E-05</b> | <b>3.06E-04</b>               | GUSTO and BIS                    | -1.92                                     | (-2.45--1.4)        | <b>6.80E-13</b> | <b>2.98E-12</b> |
| DG(16:0_22:5) | 2.32                                                                                       | (0.94-3.72)   | <b>9.73E-04</b> | <b>3.07E-03</b> | BIS only                         | 1.08                                                                                                               | (0.33-1.82)     | <b>4.65E-03</b>     | <b>7.82E-03</b>                              | -4.31                           | (-5.44--3.18) | <b>2.22E-13</b> | <b>4.12E-12</b>               | GUSTO and BIS                    | -2.76                                     | (-3.42--2.09)       | <b>3.35E-16</b> | <b>1.85E-15</b> |
| DG(18:2_20:4) | 2.45                                                                                       | (1.24-3.67)   | <b>6.69E-05</b> | <b>3.11E-04</b> | BIS only                         | 1.35                                                                                                               | (0.65-2.04)     | <b>1.50E-04</b>     | <b>3.41E-04</b>                              | -3.12                           | (-4.09--2.15) | <b>4.51E-10</b> | <b>4.77E-09</b>               | GUSTO and BIS                    | -3.13                                     | (-3.74--2.53)       | <b>2.07E-24</b> | <b>1.78E-23</b> |
| DG(16:0_22:6) | 3.43                                                                                       | (1.88-5.01)   | <b>1.30E-05</b> | <b>7.85E-05</b> | BIS only                         | 1.94                                                                                                               | (1.03-2.86)     | <b>3.23E-05</b>     | <b>8.28E-05</b>                              | -4.45                           | (-5.52--3.39) | <b>1.00E-15</b> | <b>2.45E-14</b>               | GUSTO and BIS                    | -4.20                                     | (-4.79--3.61)       | <b>5.66E-44</b> | <b>1.75E-42</b> |
| DG(18:1_22:5) | 3.06                                                                                       | (1.95-4.17)   | <b>5.46E-08</b> | <b>7.45E-07</b> | BIS only                         | 1.43                                                                                                               | (0.76-2.09)     | <b>2.68E-05</b>     | <b>7.06E-05</b>                              | -1.58                           | (-2.32--0.84) | <b>3.41E-05</b> | <b>1.48E-04</b>               | GUSTO and BIS                    | -1.73                                     | (-2.27--1.19)       | <b>4.74E-10</b> | <b>1.68E-09</b> |
| DG(18:1_22:6) | 4.34                                                                                       | (2.91-5.79)   | <b>2.49E-09</b> | <b>5.50E-08</b> | GUSTO and BIS                    | 2.53                                                                                                               | (1.67-3.39)     | <b>7.83E-09</b>     | <b>3.79E-08</b>                              | -3.89                           | (-4.84--2.93) | <b>4.72E-15</b> | <b>1.04E-13</b>               | GUSTO and BIS                    | -3.63                                     | (-4.19--3.07)       | <b>4.57E-37</b> | <b>9.64E-36</b> |
| DG(18:2_22:6) | 3.34                                                                                       | (1.77-4.94)   | <b>2.92E-05</b> | <b>1.57E-04</b> | GUSTO and BIS                    | 2.12                                                                                                               | (1.21-3.02)     | <b>4.73E-06</b>     | <b>1.41E-05</b>                              | -5.08                           | (-6.21--3.96) | <b>4.34E-18</b> | <b>2.01E-16</b>               | GUSTO and BIS                    | -4.36                                     | (-5.01--3.71)       | <b>7.07E-40</b> | <b>1.64E-38</b> |

|                    |       |               |                 |                 |               |       |               |                 |                 |       |               |                 |                 |               |       |               |                 |                 |
|--------------------|-------|---------------|-----------------|-----------------|---------------|-------|---------------|-----------------|-----------------|-------|---------------|-----------------|-----------------|---------------|-------|---------------|-----------------|-----------------|
| TG(48:0) [NL-18:0] | -3.52 | (-5.19--1.83) | <b>5.76E-05</b> | <b>2.73E-04</b> | GUSTO and BIS | -1.98 | (-2.76--1.2)  | <b>6.07E-07</b> | <b>2.13E-06</b> | 0.07  | (-0.69-0.84)  | 8.51E-01        | 8.91E-01        | GUSTO only    | -0.58 | (-1.16-0)     | 5.07E-02        | 7.47E-02        |
| TG(48:1) [NL-16:1] | -0.31 | (-1.92-1.33)  | 7.10E-01        | 7.74E-01        | notSig        | 0.24  | (-0.69-1.17)  | 6.09E-01        | 6.62E-01        | -0.31 | (-1.24-0.62)  | 5.11E-01        | 6.06E-01        | GUSTO only    | -1.34 | (-2.01--0.68) | <b>7.78E-05</b> | <b>1.82E-04</b> |
| TG(48:1) [NL-18:1] | -2.33 | (-3.29--1.37) | <b>3.02E-06</b> | <b>2.46E-05</b> | BIS only      | -1.40 | (-2.05--0.75) | <b>2.50E-05</b> | <b>6.69E-05</b> | -0.80 | (-1.74-0.14)  | 9.49E-02        | 1.54E-01        | GUSTO only    | -2.11 | (-2.73--1.48) | <b>4.31E-11</b> | <b>1.61E-10</b> |
| TG(48:2) [NL-14:0] | -1.38 | (-2.47--0.28) | <b>1.44E-02</b> | <b>3.12E-02</b> | BIS only      | -1.15 | (-1.9--0.39)  | <b>2.83E-03</b> | <b>4.98E-03</b> | -2.11 | (-3.22--1)    | <b>1.96E-04</b> | <b>7.20E-04</b> | GUSTO and BIS | -3.24 | (-3.86--2.62) | <b>1.29E-24</b> | <b>1.13E-23</b> |
| TG(48:2) [NL-14:1] | -1.37 | (-2.85-0.13)  | 7.37E-02        | 1.22E-01        | GUSTO only    | -1.26 | (-2.12--0.39) | <b>4.40E-03</b> | <b>7.46E-03</b> | -1.65 | (-2.91--0.39) | <b>1.01E-02</b> | <b>2.37E-02</b> | GUSTO and BIS | -2.67 | (-3.33--2)    | <b>5.20E-15</b> | <b>2.65E-14</b> |
| TG(48:2) [NL-16:1] | 0.72  | (-0.78-2.25)  | 3.48E-01        | 4.37E-01        | notSig        | 0.21  | (-0.78-1.2)   | 6.73E-01        | 7.19E-01        | -0.87 | (-1.76-0.03)  | 5.73E-02        | 1.05E-01        | GUSTO only    | -1.92 | (-2.53--1.3)  | <b>9.98E-10</b> | <b>3.43E-09</b> |
| TG(48:2) [NL-18:2] | -2.43 | (-3.5--1.36)  | <b>1.21E-05</b> | <b>7.41E-05</b> | GUSTO and BIS | -1.78 | (-2.52--1.03) | <b>2.94E-06</b> | <b>9.16E-06</b> | -2.40 | (-3.4--1.39)  | <b>3.60E-06</b> | <b>1.99E-05</b> | GUSTO and BIS | -3.50 | (-4.11--2.89) | <b>3.79E-29</b> | <b>4.19E-28</b> |
| TG(48:3) [NL-14:0] | -1.75 | (-3.43--0.04) | <b>4.49E-02</b> | 8.05E-02        | GUSTO only    | -1.58 | (-2.53--0.64) | <b>9.75E-04</b> | <b>1.81E-03</b> | -3.53 | (-4.8--2.25)  | <b>7.61E-08</b> | <b>5.88E-07</b> | GUSTO and BIS | -3.91 | (-4.55--3.27) | <b>3.03E-33</b> | <b>4.26E-32</b> |
| TG(48:3) [NL-16:1] | 0.38  | (-1.25-2.05)  | 6.47E-01        | 7.13E-01        | notSig        | -0.64 | (-1.59-0.31)  | 1.86E-01        | 2.27E-01        | -2.17 | (-3.11--1.23) | <b>6.87E-06</b> | <b>3.58E-05</b> | GUSTO and BIS | -2.62 | (-3.2--2.04)  | <b>9.32E-19</b> | <b>5.61E-18</b> |
| TG(48:3) [NL-18:3] | -3.12 | (-4.76--1.46) | <b>2.71E-04</b> | <b>1.06E-03</b> | GUSTO and BIS | -2.30 | (-3.3--1.29)  | <b>7.64E-06</b> | <b>2.19E-05</b> | -2.68 | (-3.82--1.55) | <b>4.18E-06</b> | <b>2.23E-05</b> | GUSTO and BIS | -3.08 | (-3.68--2.47) | <b>1.61E-23</b> | <b>1.31E-22</b> |
| TG(49:1) [NL-17:1] | 0.59  | (-0.99-2.2)   | 4.67E-01        | 5.50E-01        | notSig        | 0.39  | (-0.37-1.16)  | 3.14E-01        | 3.62E-01        | -1.18 | (-2.06--0.3)  | <b>8.39E-03</b> | <b>2.04E-02</b> | GUSTO and BIS | -1.80 | (-2.34--1.26) | <b>6.71E-11</b> | <b>2.43E-10</b> |
| TG(50:1) [NL-14:0] | -2.79 | (-3.99--1.57) | <b>9.51E-06</b> | <b>6.23E-05</b> | BIS only      | -1.37 | (-2.01--0.73) | <b>3.05E-05</b> | <b>7.90E-05</b> | -0.33 | (-1.16-0.51)  | 4.43E-01        | 5.41E-01        | GUSTO only    | -0.83 | (-1.46--0.21) | <b>9.17E-03</b> | <b>1.59E-02</b> |
| TG(50:1) [NL-16:0] | 0.08  | (-0.72-0.89)  | 8.39E-01        | 8.75E-01        | GUSTO only    | 0.56  | (0.07-1.04)   | <b>2.39E-02</b> | <b>3.43E-02</b> | -0.91 | (-1.67--0.15) | <b>1.93E-02</b> | <b>4.12E-02</b> | GUSTO and BIS | -1.65 | (-2.2--1.1)   | <b>4.95E-09</b> | <b>1.64E-08</b> |
| TG(50:1) [NL-18:1] | 0.05  | (-0.66-0.76)  | 8.98E-01        | 9.20E-01        | GUSTO only    | 0.47  | (0.02-0.92)   | <b>3.88E-02</b> | 5.39E-02        | -0.86 | (-1.52--0.21) | <b>1.01E-02</b> | <b>2.37E-02</b> | GUSTO and BIS | -1.50 | (-2.01--0.99) | <b>7.44E-09</b> | <b>2.40E-08</b> |
| TG(50:2) [NL-14:0] | -0.97 | (-1.73--0.2)  | <b>1.41E-02</b> | <b>3.07E-02</b> | GUSTO and BIS | -0.76 | (-1.22--0.3)  | <b>1.14E-03</b> | <b>2.08E-03</b> | -0.48 | (-1.4-0.45)   | 3.11E-01        | 4.14E-01        | GUSTO only    | -2.09 | (-2.7--1.48)  | <b>1.95E-11</b> | <b>7.56E-11</b> |
| TG(50:2) [NL-16:1] | 1.29  | (0.46-2.13)   | <b>2.41E-03</b> | <b>6.77E-03</b> | BIS only      | 0.92  | (0.38-1.47)   | <b>9.27E-04</b> | <b>1.73E-03</b> | -0.44 | (-1.23-0.34)  | 2.68E-01        | 3.67E-01        | GUSTO only    | -1.62 | (-2.2--1.05)  | <b>3.43E-08</b> | <b>1.05E-07</b> |
| TG(50:2) [NL-18:1] | 0.16  | (-0.42-0.75)  | 5.85E-01        | 6.61E-01        | notSig        | 0.23  | (-0.19-0.66)  | 2.82E-01        | 3.33E-01        | -0.42 | (-1.11-0.27)  | 2.33E-01        | 3.33E-01        | GUSTO only    | -1.50 | (-2.03--0.96) | <b>4.88E-08</b> | <b>1.45E-07</b> |
| TG(50:2) [NL-18:2] | -0.43 | (-1.17-0.32)  | 2.61E-01        | 3.50E-01        | GUSTO only    | 0.25  | (-0.21-0.7)   | 2.91E-01        | 3.40E-01        | -2.06 | (-2.84--1.27) | <b>3.16E-07</b> | <b>2.19E-06</b> | GUSTO and BIS | -3.08 | (-3.64--2.52) | <b>4.68E-27</b> | <b>4.72E-26</b> |
| TG(50:3) [NL-14:0] | -1.31 | (-2.05--0.58) | <b>5.22E-04</b> | <b>1.92E-03</b> | BIS only      | -0.91 | (-1.43--0.39) | <b>5.80E-04</b> | <b>1.13E-03</b> | -2.92 | (-4.09--1.74) | <b>1.49E-06</b> | <b>8.86E-06</b> | GUSTO and BIS | -3.87 | (-4.5--3.23)  | <b>4.82E-33</b> | <b>6.39E-32</b> |
| TG(50:3) [NL-14:1] | -0.54 | (-1.57-0.5)   | 3.05E-01        | 3.97E-01        | notSig        | -0.61 | (-1.17--0.06) | <b>3.04E-02</b> | <b>4.30E-02</b> | -1.34 | (-2.49--0.18) | <b>2.31E-02</b> | <b>4.77E-02</b> | GUSTO and BIS | -2.03 | (-2.7--1.35)  | <b>3.68E-09</b> | <b>1.23E-08</b> |
| TG(50:3) [NL-16:1] | 1.82  | (0.94-2.72)   | <b>5.63E-05</b> | <b>2.69E-04</b> | BIS only      | 1.17  | (0.55-1.78)   | <b>1.83E-04</b> | <b>4.07E-04</b> | -1.95 | (-2.85--1.05) | <b>2.21E-05</b> | <b>1.01E-04</b> | GUSTO and BIS | -3.10 | (-3.67--2.52) | <b>3.03E-26</b> | <b>2.99E-25</b> |
| TG(50:3) [NL-18:2] | 0.36  | (-0.27-0.99)  | 2.69E-01        | 3.60E-01        | notSig        | 0.32  | (-0.16-0.81)  | 1.85E-01        | 2.26E-01        | -2.52 | (-3.45--1.6)  | <b>1.12E-07</b> | <b>8.36E-07</b> | GUSTO and BIS | -3.65 | (-4.23--3.08) | <b>1.24E-35</b> | <b>2.13E-34</b> |
| TG(50:3) [NL-18:3] | -1.20 | (-2.3--0.08)  | <b>3.50E-02</b> | 6.56E-02        | notSig        | -0.41 | (-1.12-0.3)   | 2.57E-01        | 3.06E-01        | -2.39 | (-3.36--1.42) | <b>1.62E-06</b> | <b>9.51E-06</b> | GUSTO and BIS | -3.25 | (-3.86--2.64) | <b>1.05E-25</b> | <b>9.52E-25</b> |
| TG(50:4) [NL-14:0] | -1.26 | (-2.67-0.17)  | 8.43E-02        | 1.37E-01        | notSig        | -1.00 | (-1.83--0.18) | <b>1.73E-02</b> | <b>2.55E-02</b> | -4.67 | (-6.01--3.34) | <b>1.27E-11</b> | <b>1.73E-10</b> | GUSTO and BIS | -4.39 | (-5.01--3.77) | <b>1.13E-43</b> | <b>3.28E-42</b> |
| TG(50:4) [NL-18:3] | -0.36 | (-1.65-0.94)  | 5.84E-01        | 6.61E-01        | notSig        | -0.58 | (-1.39-0.23)  | 1.62E-01        | 2.01E-01        | -3.25 | (-4.4--2.11)  | <b>3.61E-08</b> | <b>2.84E-07</b> | GUSTO and BIS | -3.75 | (-4.33--3.17) | <b>1.06E-36</b> | <b>2.05E-35</b> |
| TG(50:4) [NL-20:4] | -1.30 | (-2.92-0.35)  | 1.22E-01        | 1.84E-01        | notSig        | -1.02 | (-2.07-0.04)  | 5.92E-02        | 8.06E-02        | -2.53 | (-3.68--1.38) | <b>1.81E-05</b> | <b>8.42E-05</b> | GUSTO and BIS | -3.15 | (-3.85--2.45) | <b>1.04E-18</b> | <b>6.18E-18</b> |
| TG(51:1) [NL-17:0] | 1.56  | (0.29-2.83)   | <b>1.55E-02</b> | <b>3.29E-02</b> | BIS only      | 0.90  | (0.25-1.54)   | <b>6.39E-03</b> | <b>1.04E-02</b> | -1.72 | (-2.74--0.71) | <b>8.91E-04</b> | <b>2.77E-03</b> | GUSTO and BIS | -2.36 | (-2.97--1.75) | <b>3.56E-14</b> | <b>1.72E-13</b> |
| TG(51:2) [NL-15:0] | 1.27  | (0.22-2.32)   | <b>1.79E-02</b> | <b>3.72E-02</b> | BIS only      | -0.02 | (-0.58-0.54)  | 9.37E-01        | 9.47E-01        | -2.20 | (-3.35--1.06) | <b>1.71E-04</b> | <b>6.36E-04</b> | GUSTO and BIS | -3.00 | (-3.64--2.35) | <b>9.85E-20</b> | <b>6.38E-19</b> |
| TG(51:2) [NL-17:0] | 2.24  | (1.27-3.23)   | <b>6.14E-06</b> | <b>4.43E-05</b> | BIS only      | 0.99  | (0.42-1.55)   | <b>5.85E-04</b> | <b>1.14E-03</b> | -1.83 | (-2.83--0.84) | <b>3.12E-04</b> | <b>1.11E-03</b> | GUSTO and BIS | -2.83 | (-3.43--2.23) | <b>3.31E-20</b> | <b>2.19E-19</b> |
| TG(51:2) [NL-17:1] | 2.25  | (1.27-3.24)   | <b>6.21E-06</b> | <b>4.43E-05</b> | BIS only      | 0.95  | (0.4-1.5)     | <b>6.95E-04</b> | <b>1.33E-03</b> | -1.84 | (-2.84--0.84) | <b>3.17E-04</b> | <b>1.11E-03</b> | GUSTO and BIS | -2.57 | (-3.12--2.01) | <b>1.23E-19</b> | <b>7.83E-19</b> |
| TG(52:1) [NL-18:0] | 1.13  | (0.07-2.21)   | <b>3.75E-02</b> | 6.89E-02        | GUSTO only    | 1.29  | (0.65-1.93)   | <b>7.59E-05</b> | <b>1.81E-04</b> | -0.34 | (-1.34-0.67)  | 5.14E-01        | 6.06E-01        | GUSTO only    | -1.13 | (-1.83--0.43) | <b>1.48E-03</b> | <b>2.90E-03</b> |
| TG(52:1) [NL-18:1] | 1.62  | (0.43-2.82)   | <b>7.55E-03</b> | <b>1.79E-02</b> | GUSTO and BIS | 1.50  | (0.85-2.15)   | <b>5.43E-06</b> | <b>1.57E-05</b> | -0.56 | (-1.66-0.55)  | 3.24E-01        | 4.28E-01        | GUSTO only    | -1.26 | (-1.99--0.53) | <b>6.97E-04</b> | <b>1.45E-03</b> |
| TG(52:2) [NL-16:0] | 1.13  | (0.49-1.77)   | <b>5.41E-04</b> | <b>1.97E-03</b> | GUSTO and BIS | 0.90  | (0.55-1.24)   | <b>2.89E-07</b> | <b>1.12E-06</b> | -0.99 | (-1.78--0.2)  | <b>1.40E-02</b> | <b>3.09E-02</b> | GUSTO and BIS | -2.02 | (-2.53--1.5)  | <b>2.34E-14</b> | <b>1.14E-13</b> |
| TG(52:2) [NL-18:2] | -0.46 | (-1.3-0.38)   | 2.83E-01        | 3.74E-01        | notSig        | 0.14  | (-0.35-0.64)  | 5.74E-01        | 6.31E-01        | -1.63 | (-2.53--0.73) | <b>3.91E-04</b> | <b>1.33E-03</b> | GUSTO and BIS | -2.20 | (-2.83--1.56) | <b>9.40E-12</b> | <b>3.86E-11</b> |
| TG(52:3) [NL-16:1] | 1.90  | (1.05-2.75)   | <b>1.03E-05</b> | <b>6.59E-05</b> | BIS only      | 0.86  | (0.39-1.34)   | <b>3.56E-04</b> | <b>7.37E-04</b> | -0.57 | (-1.42-0.28)  | 1.90E-01        | 2.80E-01        | GUSTO only    | -2.11 | (-2.68--1.54) | <b>5.56E-13</b> | <b>2.45E-12</b> |
| TG(52:3) [NL-18:2] | 0.51  | (-0.04-1.07)  | 7.11E-02        | 1.19E-01        | GUSTO only    | 0.66  | (0.32-1.01)   | <b>1.84E-04</b> | <b>4.07E-04</b> | -2.39 | (-3.27--1.51) | <b>1.37E-07</b> | <b>9.90E-07</b> | GUSTO and BIS | -3.61 | (-4.16--3.05) | <b>2.57E-37</b> | <b>5.69E-36</b> |
| TG(52:4) [NL-16:1] | 2.54  | (1.64-3.44)   | <b>2.78E-08</b> | <b>4.30E-07</b> | BIS only      | 1.42  | (0.85-1.98)   | <b>9.55E-07</b> | <b>3.10E-06</b> | -3.04 | (-4.19--1.89) | <b>2.88E-07</b> | <b>2.02E-06</b> | GUSTO and BIS | -4.12 | (-4.72--3.53) | <b>2.39E-42</b> | <b>6.16E-41</b> |
| TG(52:4) [NL-18:2] | 1.00  | (0.17-1.84)   | <b>1.88E-02</b> | <b>3.85E-02</b> | GUSTO and BIS | 1.11  | (0.55-1.67)   | <b>1.13E-04</b> | <b>2.62E-04</b> | -3.62 | (-4.64--2.59) | <b>1.11E-11</b> | <b>1.61E-10</b> | GUSTO and BIS | -4.53 | (-5.12--3.95) | <b>3.66E-52</b> | <b>1.70E-50</b> |
| TG(52:4) [NL-18:3] | -0.10 | (-0.85-0.65)  | 7.92E-01        | 8.41E-01        | notSig        | 0.20  | (-0.32-0.71)  | 4.51E-01        | 5.09E-01        | -2.88 | (-4--1.75)    | <b>6.99E-07</b> | <b>4.44E-06</b> | GUSTO and BIS | -3.75 | (-4.36--3.15) | <b>6.14E-34</b> | <b>8.90E-33</b> |
| TG(52:5) [NL-18:3] | 0.20  | (-1.12-1.53)  | 7.71E-01        | 8.21E-01        | notSig        | 0.13  | (-0.67-0.93)  | 7.44E-01        | 7.84E-01        | -4.40 | (-5.64--3.16) | <b>8.60E-12</b> | <b>1.33E-10</b> | GUSTO and BIS | -4.22 | (-4.82--3.62) | <b>6.84E-43</b> | <b>1.87E-41</b> |
| TG(52:5) [NL-20:4] | 1.26  | (-0.1-2.63)   | 6.85E-02        | 1.16E-01        | notSig        | 0.82  | (-0.08-1.72)  | 7.36E-02        | 9.81E-02        | -2.37 | (-3.41--1.33) | <b>8.78E-06</b> | <b>4.35E-05</b> | GUSTO and BIS | -3.14 | (-3.78--2.49) | <b>2.43E-21</b> | <b>1.73E-20</b> |
| TG(52:5) [NL-20:5] | -0.16 | (-1.67-1.38)  | 8.41E-01        | 8.75E-01        | notSig        | 0.43  | (-0.55-1.41)  | 3.92E-01        | 4.47E-01        | -4.88 | (-6.11--3.66) | <b>1.65E-14</b> | <b>3.33E-13</b> | GUSTO and BIS | -4.56 | (-5.19--3.92) | <b>7.69E-45</b> | <b>2.74E-43</b> |
| TG(53:2) [NL-18:1] | 2.37  | (1.44-3.31)   | <b>5.97E-07</b> | <b>5.90E-06</b> | GUSTO and BIS | 1.39  | (0.84-1.94)   | <b>6.65E-07</b> | <b>2.26E-06</b> | -1.82 | (-2.78--0.86) | <b>2.02E-04</b> | <b>7.36E-04</b> | GUSTO and BIS | -2.40 | (-2.95--1.85) | <b>1.36E-17</b> | <b>7.80E-17</b> |
| TG(54:1) [NL-18:1] | 0.32  | (-1.39-2.06)  | 7.16E-01        | 7.77E-01        | GUSTO only    | 0.90  | (0.28-1.53)   | <b>4.52E-03</b> | <b>7.62E-03</b> | 0.19  | (-0.84-1.21)  | 7.22E-01        | 7.92E-01        | GUSTO only    | -0.76 | (-1.47--0.05) | <b>3.56E-02</b> | 5.52E-02        |
| TG(54:2) [NL-18:0] | 0.95  | (-0.15-2.06)  | 9.07E-02        | 1.46E-01        | GUSTO only    | 1.28  | (0.69-1.87)   | <b>1.97E-05</b> | <b>5.44E-05</b> | -0.31 | (-1.36-0.73)  | 5.58E-01        | 6.40E-01        | GUSTO only    | -1.21 | (-1.88--0.53) | <b>4.79E-04</b> | <b>1.03E-03</b> |
| TG(54:2) [NL-20:1] | 2.17  | (1.15-3.19)   | <b>2.60E-05</b> | <b>1.44E-04</b> | BIS only      | 1.07  | (0.46-1.69)   | <b>6.58E-04</b> | <b>1.27E-03</b> | -0.36 | (-1.53-0.81)  | 5.45E-01        | 6.32E-01        | GUSTO only    | -1.33 | (-2.01--0.64) | <b>1.40E-04</b> | <b>3.20E-04</b> |
| TG(54:3) [NL-18:1] | 0.68  | (-0.2-1.58)   | 1.31E-01        | 1.96E-01        | notSig        | 0.60  | (0.13-1.08)   | <b>1.27E-02</b> | <b>1.94E-02</b> | -0.07 | (-0.75-0.61)  | 8.34E-01        | 8.82E-01        | GUSTO only    | -1.04 | (-1.54--0.54) | <b>4.79E-05</b> | <b>1.15E-04</b> |
| TG(54:3) [NL-18:2] | 0.43  | (-0.44-1.31   |                 |                 |               |       |               |                 |                 |       |               |                 |                 |               |       |               |                 |                 |

|                      |       |               |                 |                 |               |       |               |                 |                 |       |               |                 |                 |               |       |               |                 |                 |
|----------------------|-------|---------------|-----------------|-----------------|---------------|-------|---------------|-----------------|-----------------|-------|---------------|-----------------|-----------------|---------------|-------|---------------|-----------------|-----------------|
| TG(54:6) [NL-18:3]   | 0.13  | (-1.5-1.79)   | 8.78E-01        | 9.01E-01        | notSig        | -0.23 | (-1.18-0.72)  | 6.39E-01        | 6.89E-01        | -3.59 | (-4.73--2.45) | <b>1.06E-09</b> | <b>1.03E-08</b> | GUSTO and BIS | -3.78 | (-4.38--3.19) | <b>2.63E-35</b> | <b>4.21E-34</b> |
| TG(54:6) [NL-20:4]   | 1.79  | (0.88-2.71)   | <b>1.16E-04</b> | <b>5.05E-04</b> | GUSTO and BIS | 1.45  | (0.83-2.06)   | <b>4.34E-06</b> | <b>1.30E-05</b> | -3.12 | (-4.1--2.14)  | <b>7.87E-10</b> | <b>7.77E-09</b> | GUSTO and BIS | -3.73 | (-4.34--3.12) | <b>3.88E-33</b> | <b>5.29E-32</b> |
| TG(54:6) [NL-20:5]   | 1.12  | (-0.09-2.35)  | 6.96E-02        | 1.17E-01        | notSig        | 0.97  | (0.14-1.81)   | <b>2.18E-02</b> | <b>3.15E-02</b> | -4.78 | (-5.95--3.6)  | <b>6.83E-15</b> | <b>1.44E-13</b> | GUSTO and BIS | -4.97 | (-5.57--4.36) | <b>3.94E-58</b> | <b>2.28E-56</b> |
| TG(54:6) [NL-22:6]   | 1.92  | (0.5-3.36)    | <b>7.92E-03</b> | <b>1.85E-02</b> | GUSTO and BIS | 1.84  | (0.91-2.78)   | <b>1.06E-04</b> | <b>2.47E-04</b> | -4.45 | (-5.51--3.38) | <b>1.07E-15</b> | <b>2.49E-14</b> | GUSTO and BIS | -4.93 | (-5.53--4.34) | <b>6.08E-59</b> | <b>4.03E-57</b> |
| TG(54:7) [NL-20:5]   | 2.11  | (0.44-3.82)   | <b>1.34E-02</b> | <b>2.95E-02</b> | BIS only      | 1.07  | (0.05-2.1)    | <b>4.02E-02</b> | 5.57E-02        | -6.33 | (-7.66--5)    | <b>1.20E-19</b> | <b>7.13E-18</b> | GUSTO and BIS | -5.27 | (-5.89--4.65) | <b>1.35E-61</b> | <b>1.57E-59</b> |
| TG(54:7) [NL-22:6]   | 3.03  | (1.47-4.61)   | <b>1.30E-04</b> | <b>5.49E-04</b> | BIS only      | 1.84  | (0.82-2.85)   | <b>3.90E-04</b> | <b>7.93E-04</b> | -5.23 | (-6.42--4.05) | <b>3.09E-17</b> | <b>1.10E-15</b> | GUSTO and BIS | -5.00 | (-5.59--4.4)  | <b>5.92E-61</b> | <b>4.58E-59</b> |
| TG(56:6) [NL-20:4]   | 1.52  | (0.58-2.46)   | <b>1.53E-03</b> | <b>4.58E-03</b> | GUSTO and BIS | 1.38  | (0.92-1.84)   | <b>4.37E-09</b> | <b>2.23E-08</b> | -1.04 | (-1.92--0.15) | <b>2.18E-02</b> | <b>4.56E-02</b> | GUSTO and BIS | -2.11 | (-2.71--1.52) | <b>3.91E-12</b> | <b>1.64E-11</b> |
| TG(56:7) [NL-20:4]   | 1.01  | (0.1-1.92)    | <b>2.88E-02</b> | 5.56E-02        | GUSTO only    | 1.02  | (0.48-1.56)   | <b>2.28E-04</b> | <b>4.92E-04</b> | -2.52 | (-3.61--1.44) | <b>6.15E-06</b> | <b>3.24E-05</b> | GUSTO and BIS | -3.26 | (-3.91--2.62) | <b>3.97E-23</b> | <b>3.12E-22</b> |
| TG(56:7) [NL-20:5]   | 0.93  | (-0.31-2.19)  | 1.42E-01        | 2.11E-01        | notSig        | 0.63  | (-0.2-1.46)   | 1.39E-01        | 1.74E-01        | -3.67 | (-4.79--2.56) | <b>2.02E-10</b> | <b>2.47E-09</b> | GUSTO and BIS | -3.75 | (-4.38--3.12) | <b>3.53E-31</b> | <b>4.31E-30</b> |
| TG(56:7) [NL-22:6]   | 3.23  | (2.1-4.37)    | <b>2.13E-08</b> | <b>3.81E-07</b> | GUSTO and BIS | 2.56  | (1.77-3.35)   | <b>2.14E-10</b> | <b>1.36E-09</b> | -4.32 | (-5.32--3.31) | <b>1.93E-16</b> | <b>5.98E-15</b> | GUSTO and BIS | -4.83 | (-5.4--4.25)  | <b>2.44E-61</b> | <b>2.27E-59</b> |
| TG(56:8) [NL-20:4]   | 0.85  | (-0.38-2.09)  | 1.78E-01        | 2.55E-01        | notSig        | 0.82  | (0.07-1.56)   | <b>3.19E-02</b> | <b>4.49E-02</b> | -3.04 | (-4.15--1.94) | <b>8.83E-08</b> | <b>6.72E-07</b> | GUSTO and BIS | -2.98 | (-3.64--2.32) | <b>7.27E-19</b> | <b>4.44E-18</b> |
| TG(56:8) [NL-20:5]   | 1.07  | (-0.46-2.61)  | 1.71E-01        | 2.47E-01        | notSig        | 0.54  | (-0.43-1.51)  | 2.78E-01        | 3.29E-01        | -5.25 | (-6.49--4.01) | <b>5.15E-16</b> | <b>1.41E-14</b> | GUSTO and BIS | -4.40 | (-5.02--3.79) | <b>1.62E-44</b> | <b>5.38E-43</b> |
| TG(56:8) [NL-22:6]   | 3.61  | (2.28-4.97)   | <b>1.02E-07</b> | <b>1.31E-06</b> | GUSTO and BIS | 2.60  | (1.7-3.51)    | <b>1.75E-08</b> | <b>7.98E-08</b> | -5.76 | (-6.86--4.65) | <b>6.44E-23</b> | <b>1.19E-20</b> | GUSTO and BIS | -5.46 | (-6.03--4.9)  | <b>9.51E-80</b> | <b>4.41E-77</b> |
| TG(56:9) [NL-22:6]   | 2.32  | (0.63-4.04)   | <b>7.16E-03</b> | <b>1.70E-02</b> | BIS only      | 1.29  | (0.31-2.27)   | <b>9.72E-03</b> | <b>1.52E-02</b> | -6.30 | (-7.52--5.09) | <b>7.68E-23</b> | <b>1.19E-20</b> | GUSTO and BIS | -5.21 | (-5.79--4.62) | <b>1.65E-68</b> | <b>3.83E-66</b> |
| TG(58:10) [NL-22:6]  | 1.99  | (0.3-3.71)    | <b>2.10E-02</b> | <b>4.18E-02</b> | BIS only      | 1.29  | (0.32-2.26)   | <b>9.36E-03</b> | <b>1.47E-02</b> | -5.80 | (-6.99--4.61) | <b>1.65E-20</b> | <b>1.27E-18</b> | GUSTO and BIS | -4.80 | (-5.39--4.21) | <b>1.63E-57</b> | <b>8.42E-56</b> |
| TG(58:8) [NL-22:6]   | 2.68  | (1.4-3.98)    | <b>4.04E-05</b> | <b>2.06E-04</b> | GUSTO and BIS | 1.97  | (1.14-2.8)    | <b>3.53E-06</b> | <b>1.08E-05</b> | -4.00 | (-5.01--2.99) | <b>2.81E-14</b> | <b>5.43E-13</b> | GUSTO and BIS | -4.34 | (-4.92--3.76) | <b>2.48E-49</b> | <b>1.04E-47</b> |
| TG(58:9) [NL-22:6]   | 2.27  | (0.81-3.74)   | <b>2.19E-03</b> | <b>6.26E-03</b> | BIS only      | 1.62  | (0.72-2.53)   | <b>4.53E-04</b> | <b>9.06E-04</b> | -5.43 | (-6.62--4.24) | <b>2.33E-18</b> | <b>1.20E-16</b> | GUSTO and BIS | -4.92 | (-5.5--4.34)  | <b>4.05E-62</b> | <b>6.26E-60</b> |
| TG(O-50:1) [NL-16:0] | -0.17 | (-1.21-0.88)  | 7.51E-01        | 8.08E-01        | notSig        | -0.19 | (-0.71-0.32)  | 4.60E-01        | 5.19E-01        | -0.74 | (-1.49-0.02)  | 5.49E-02        | 1.01E-01        | notSig        | -0.66 | (-1.19--0.13) | <b>1.39E-02</b> | <b>2.33E-02</b> |
| TG(O-50:1) [NL-17:1] | -0.65 | (-1.62-0.34)  | 1.97E-01        | 2.76E-01        | notSig        | -0.10 | (-0.75-0.55)  | 7.61E-01        | 7.99E-01        | -0.61 | (-1.19--0.03) | <b>3.78E-02</b> | 7.30E-02        | GUSTO only    | -1.25 | (-1.69--0.8)  | <b>4.46E-08</b> | <b>1.33E-07</b> |
| TG(O-50:1) [NL-18:1] | -0.83 | (-1.86-0.21)  | 1.16E-01        | 1.79E-01        | notSig        | -0.68 | (-1.23--0.12) | <b>1.70E-02</b> | <b>2.53E-02</b> | -0.86 | (-1.65--0.07) | <b>3.23E-02</b> | 6.40E-02        | GUSTO only    | -0.93 | (-1.46--0.39) | <b>7.04E-04</b> | <b>1.46E-03</b> |
| TG(O-50:2) [NL-18:2] | -0.25 | (-1.58-1.1)   | 7.14E-01        | 7.76E-01        | notSig        | -0.10 | (-0.63-0.43)  | 7.25E-01        | 7.70E-01        | -0.57 | (-1.52-0.38)  | 2.42E-01        | 3.43E-01        | notSig        | -0.50 | (-1.1-0.1)    | 1.05E-01        | 1.44E-01        |
| TG(O-52:2) [NL-16:0] | 0.73  | (-0.37-1.85)  | 1.91E-01        | 2.71E-01        | notSig        | 0.12  | (-0.54-0.77)  | 7.27E-01        | 7.70E-01        | -0.04 | (-1.03-0.96)  | 9.42E-01        | 9.54E-01        | GUSTO only    | -0.62 | (-1.31-0.07)  | 7.77E-02        | 1.09E-01        |
| TG(O-52:2) [NL-17:1] | 0.64  | (-0.33-1.62)  | 1.99E-01        | 2.78E-01        | notSig        | 0.45  | (-0.1-1)      | 1.12E-01        | 1.43E-01        | -0.56 | (-1.27-0.14)  | 1.18E-01        | 1.86E-01        | GUSTO only    | -1.78 | (-2.27--1.29) | <b>9.10E-13</b> | <b>3.95E-12</b> |
| TG(O-52:2) [NL-18:1] | 0.72  | (-0.36-1.81)  | 1.93E-01        | 2.72E-01        | notSig        | -0.02 | (-0.68-0.64)  | 9.47E-01        | 9.55E-01        | -0.58 | (-1.36-0.19)  | 1.38E-01        | 2.12E-01        | GUSTO only    | -1.09 | (-1.69--0.49) | <b>3.34E-04</b> | <b>7.27E-04</b> |
| TG(O-54:2) [NL-18:1] | -0.29 | (-1.33-0.77)  | 5.90E-01        | 6.64E-01        | GUSTO only    | 0.52  | (-0.05-1.08)  | 7.46E-02        | 9.89E-02        | -0.40 | (-1.24-0.45)  | 3.57E-01        | 4.63E-01        | GUSTO only    | -1.77 | (-2.29--1.24) | <b>5.95E-11</b> | <b>2.17E-10</b> |
| TG(O-54:4) [NL-17:1] | -0.64 | (-1.98-0.72)  | 3.54E-01        | 4.42E-01        | notSig        | -0.09 | (-0.76-0.57)  | 7.81E-01        | 8.15E-01        | -1.75 | (-3.65-0.14)  | 7.01E-02        | 1.23E-01        | GUSTO only    | -3.73 | (-4.42--3.04) | <b>3.57E-26</b> | <b>3.45E-25</b> |
| TG(O-54:4) [NL-18:2] | 1.17  | (-0.64-3.02)  | 2.07E-01        | 2.89E-01        | notSig        | 0.25  | (-0.49-0.98)  | 5.12E-01        | 5.72E-01        | -1.24 | (-2.74-0.27)  | 1.07E-01        | 1.70E-01        | GUSTO only    | -3.95 | (-4.6--3.31)  | <b>4.99E-33</b> | <b>6.43E-32</b> |
| dhCer(d18:0/22:0)    | 0.06  | (-0.7-0.82)   | 8.75E-01        | 9.01E-01        | GUSTO only    | 0.69  | (0.2-1.18)    | <b>5.76E-03</b> | <b>9.49E-03</b> | 1.24  | (0.7-1.79)    | <b>9.64E-06</b> | <b>4.66E-05</b> | BIS only      | 0.74  | (0.31-1.17)   | <b>6.87E-04</b> | <b>1.44E-03</b> |
| dhCer(d18:0/24:0)    | -0.60 | (-1.34-0.15)  | 1.18E-01        | 1.81E-01        | notSig        | -0.10 | (-0.57-0.36)  | 6.64E-01        | 7.13E-01        | 0.80  | (0.17-1.43)   | <b>1.31E-02</b> | <b>2.90E-02</b> | BIS only      | 0.19  | (-0.27-0.66)  | 4.21E-01        | 4.79E-01        |
| dhCer(d18:0/24:1)    | 2.18  | (1.31-3.04)   | <b>7.33E-07</b> | <b>6.77E-06</b> | GUSTO and BIS | 1.89  | (1.34-2.44)   | <b>1.64E-11</b> | <b>1.28E-10</b> | 1.21  | (0.52-1.9)    | <b>5.91E-04</b> | <b>1.93E-03</b> | BIS only      | 0.63  | (0.1-1.17)    | <b>2.11E-02</b> | <b>3.44E-02</b> |
| Cer(d16:1/22:0)      | -0.82 | (-1.81-0.17)  | 1.04E-01        | 1.63E-01        | GUSTO only    | -0.75 | (-1.27--0.24) | <b>3.98E-03</b> | <b>6.81E-03</b> | -0.13 | (-0.89-0.63)  | 7.36E-01        | 8.01E-01        | GUSTO only    | -0.59 | (-1.12--0.05) | <b>3.11E-02</b> | <b>4.91E-02</b> |
| Cer(d16:1/23:0)      | -1.81 | (-2.87--0.73) | <b>1.07E-03</b> | <b>3.34E-03</b> | GUSTO and BIS | -1.22 | (-1.79--0.65) | <b>2.51E-05</b> | <b>6.69E-05</b> | -0.46 | (-1.25-0.33)  | 2.49E-01        | 3.49E-01        | notSig        | -0.64 | (-1.31-0.03)  | 6.07E-02        | 8.70E-02        |
| Cer(d16:1/24:0)      | -2.27 | (-3.24--1.28) | <b>8.83E-06</b> | <b>5.94E-05</b> | GUSTO and BIS | -2.10 | (-2.63--1.57) | <b>6.69E-15</b> | <b>8.63E-14</b> | -0.23 | (-0.91-0.45)  | 5.09E-01        | 6.06E-01        | notSig        | -0.48 | (-0.98-0.02)  | 5.95E-02        | 8.54E-02        |
| Cer(d16:1/24:1)      | 0.99  | (0.06-1.93)   | <b>3.63E-02</b> | 6.69E-02        | notSig        | 0.03  | (-0.49-0.55)  | 9.04E-01        | 9.21E-01        | 0.32  | (-0.44-1.09)  | 4.05E-01        | 5.07E-01        | notSig        | -0.02 | (-0.61-0.56)  | 9.37E-01        | 9.45E-01        |
| Cer(d17:1/22:0)      | 0.01  | (-0.89-0.93)  | 9.77E-01        | 9.82E-01        | GUSTO only    | -0.83 | (-1.36--0.3)  | <b>2.04E-03</b> | <b>3.64E-03</b> | -0.16 | (-0.8-0.49)   | 6.35E-01        | 7.17E-01        | notSig        | -0.37 | (-0.9-0.17)   | 1.79E-01        | 2.29E-01        |
| Cer(d17:1/23:0)      | -0.62 | (-1.66-0.42)  | 2.39E-01        | 3.26E-01        | GUSTO only    | -1.09 | (-1.65--0.52) | <b>1.72E-04</b> | <b>3.87E-04</b> | -0.57 | (-1.37-0.23)  | 1.63E-01        | 2.46E-01        | notSig        | -0.74 | (-1.44--0.04) | <b>3.75E-02</b> | 5.75E-02        |
| Cer(d17:1/24:0)      | -0.87 | (-1.76-0.03)  | 5.68E-02        | 1.00E-01        | GUSTO only    | -1.80 | (-2.28--1.32) | <b>2.78E-13</b> | <b>2.67E-12</b> | -0.51 | (-1.11-0.08)  | 8.98E-02        | 1.47E-01        | GUSTO only    | -0.73 | (-1.19--0.26) | <b>2.23E-03</b> | <b>4.27E-03</b> |
| Cer(d17:1/24:1)      | 1.23  | (0.34-2.12)   | <b>6.90E-03</b> | <b>1.66E-02</b> | GUSTO and BIS | -0.32 | (-0.83-0.19)  | 2.18E-01        | 2.64E-01        | -0.05 | (-0.77-0.66)  | 8.80E-01        | 9.07E-01        | notSig        | -0.41 | (-0.96-0.13)  | 1.38E-01        | 1.83E-01        |
| Cer(d18:1/16:0)      | -0.12 | (-0.75-0.5)   | 7.00E-01        | 7.64E-01        | GUSTO only    | -0.60 | (-0.97--0.23) | <b>1.51E-03</b> | <b>2.73E-03</b> | -0.25 | (-0.99-0.49)  | 5.04E-01        | 6.06E-01        | notSig        | -0.41 | (-0.87-0.05)  | 8.23E-02        | 1.15E-01        |
| Cer(d18:1/18:0)      | 2.86  | (1.89-3.83)   | <b>6.98E-09</b> | <b>1.35E-07</b> | GUSTO and BIS | 2.26  | (1.71-2.81)   | <b>9.19E-16</b> | <b>1.47E-14</b> | -0.23 | (-0.99-0.53)  | 5.53E-01        | 6.37E-01        | notSig        | -0.48 | (-0.99-0.03)  | 6.59E-02        | 9.35E-02        |
| Cer(d18:1/20:0)      | 1.49  | (0.58-2.41)   | <b>1.28E-03</b> | <b>3.87E-03</b> | BIS only      | 0.58  | (0.1-1.06)    | <b>1.82E-02</b> | <b>2.66E-02</b> | 0.09  | (-0.64-0.82)  | 8.06E-01        | 8.64E-01        | notSig        | -0.37 | (-0.85-0.12)  | 1.42E-01        | 1.88E-01        |
| Cer(d18:1/22:0)      | 0.32  | (-0.42-1.08)  | 3.94E-01        | 4.79E-01        | notSig        | 0.04  | (-0.37-0.44)  | 8.64E-01        | 8.85E-01        | 0.80  | (0.08-1.51)   | <b>2.95E-02</b> | 5.92E-02        | notSig        | 0.29  | (-0.18-0.76)  | 2.26E-01        | 2.80E-01        |
| Cer(d18:1/23:0)      | -0.19 | (-0.98-0.6)   | 6.37E-01        | 7.06E-01        | notSig        | -0.34 | (-0.75-0.07)  | 1.04E-01        | 1.35E-01        | -0.29 | (-1.19-0.61)  | 5.26E-01        | 6.17E-01        | notSig        | -0.36 | (-0.95-0.23)  | 2.33E-01        | 2.87E-01        |
| Cer(d18:1/24:0)      | -0.56 | (-1.26-0.15)  | 1.25E-01        | 1.88E-01        | GUSTO only    | -0.83 | (-1.22--0.44) | <b>2.71E-05</b> | <b>7.11E-05</b> | 0.52  | (-0.1-1.15)   | 1.02E-01        | 1.65E-01        | notSig        | 0.06  | (-0.38-0.5)   | 7.89E-01        | 8.30E-01        |
| Cer(d18:1/24:1)      | 2.15  | (1.4-2.9)     | <b>2.24E-08</b> | <b>3.83E-07</b> | BIS only      | 0.77  | (0.33-1.2)    | <b>5.12E-04</b> | <b>1.01E-03</b> | 0.71  | (-0.04-1.47)  | 6.48E-02        | 1.15E-01        | notSig        | 0.14  | (-0.36-0.64)  | 5.90E-01        | 6.48E-01        |
| Cer(d18:2/16:0)      | 0.45  | (-0.15-1.05)  | 1.39E-01        | 2.08E-01        | notSig        | 0.05  | (-0.39-0.48)  | 8.32E-01        | 8.60E-01        | 0.42  | (-0.32-1.15)  | 2.63E-01        | 3.63E-01        | notSig        | 0.32  | (-0.26-0.91)  | 2.82E-01        | 3.40E-01        |
| Cer(d18:2/22:0)      | 0.75  | (-0.07-1.58)  | 7.26E-02        | 1.21E-01        | notSig        | 0.00  | (-0.47-0.47)  | 1.00E+00        | 1.00E+00        | 0.74  | (0.08-1.4)    | <b>2.84E-02</b> | 5.73E-02        | notSig        | 0.29  | (-0.2-0.78)   | 2.46E-01        | 3.00E-01        |
| Cer(d18:2/23:0)      | 0.31  | (-0.57-1.19)  | 4.93E-01        | 5.72E-01        | notSig        | -0.29 | (-0.78-0.2)   | 2.51E-01        | 3.00E-01        | -0.14 | (-0.98-0.69)  | 7.37E-01        | 8.01E-01        | notSig        | -0.25 | (-0.89-0.39)  | 4.43E-01        | 4.99E-01        |
| Cer(d18:2/24:0)      | -0.71 | (-1.51-0.1)   | 8.56E-02        | 1.39E-01        | GUSTO only    | -1.08 | (-1.53--0.62) | <b>3.50E-06</b> | <b>1.08E-05</b> | 0.40  | (-0.28-1.09   |                 |                 |               |       |               |                 |                 |

|                               |       |               |                 |                 |               |       |               |                 |                 |       |               |                 |                 |               |       |               |                 |                 |
|-------------------------------|-------|---------------|-----------------|-----------------|---------------|-------|---------------|-----------------|-----------------|-------|---------------|-----------------|-----------------|---------------|-------|---------------|-----------------|-----------------|
| Cer(m18:0/22:0)               | -0.83 | (-2.06-0.41)  | 1.89E-01        | 2.68E-01        | notSig        | -0.06 | (-0.72-0.6)   | 8.57E-01        | 8.82E-01        | -0.33 | (-1.13-0.48)  | 4.25E-01        | 5.26E-01        | GUSTO only    | -0.70 | (-1.32--0.09) | <b>2.55E-02</b> | <b>4.10E-02</b> |
| Cer(m18:0/23:0)               | -1.40 | (-2.61--0.17) | <b>2.60E-02</b> | 5.09E-02        | notSig        | -0.20 | (-0.91-0.51)  | 5.80E-01        | 6.36E-01        | -1.06 | (-1.98--0.13) | <b>2.54E-02</b> | 5.17E-02        | notSig        | -1.11 | (-1.94--0.28) | <b>8.89E-03</b> | <b>1.55E-02</b> |
| Cer(m18:0/24:0)               | -2.13 | (-3.31--0.92) | <b>5.83E-04</b> | <b>2.10E-03</b> | BIS only      | -1.07 | (-1.73--0.42) | <b>1.33E-03</b> | <b>2.43E-03</b> | -0.62 | (-1.4-0.16)   | 1.19E-01        | 1.86E-01        | GUSTO only    | -0.91 | (-1.46--0.37) | <b>1.08E-03</b> | <b>2.20E-03</b> |
| Cer(m18:0/24:1)               | 0.66  | (-0.57-1.9)   | 2.96E-01        | 3.87E-01        | GUSTO only    | 0.98  | (0.26-1.7)    | <b>7.82E-03</b> | <b>1.25E-02</b> | -0.53 | (-1.45-0.39)  | 2.60E-01        | 3.63E-01        | GUSTO only    | -0.95 | (-1.63--0.26) | <b>6.81E-03</b> | <b>1.21E-02</b> |
| Cer(m18:1/22:0)               | 0.04  | (-1.12-1.21)  | 9.50E-01        | 9.64E-01        | notSig        | 0.43  | (-0.26-1.11)  | 2.26E-01        | 2.72E-01        | -0.75 | (-1.54-0.05)  | 6.51E-02        | 1.15E-01        | GUSTO only    | -1.76 | (-2.28--1.24) | <b>3.29E-11</b> | <b>1.24E-10</b> |
| Cer(m18:1/23:0)               | -0.58 | (-1.76-0.62)  | 3.41E-01        | 4.30E-01        | notSig        | -0.10 | (-0.83-0.62)  | 7.75E-01        | 8.10E-01        | -1.59 | (-2.57--0.61) | <b>1.46E-03</b> | <b>4.34E-03</b> | GUSTO and BIS | -2.20 | (-3--1.41)    | <b>5.32E-08</b> | <b>1.57E-07</b> |
| Cer(m18:1/24:0)               | -1.07 | (-2.13-0.01)  | 5.17E-02        | 9.19E-02        | notSig        | -0.65 | (-1.28--0.02) | <b>4.47E-02</b> | 6.18E-02        | -0.93 | (-1.66--0.2)  | <b>1.21E-02</b> | <b>2.75E-02</b> | GUSTO and BIS | -1.82 | (-2.32--1.33) | <b>4.92E-13</b> | <b>2.24E-12</b> |
| Cer(m18:1/24:1)               | 1.69  | (0.52-2.88)   | <b>4.75E-03</b> | <b>1.22E-02</b> | GUSTO and BIS | 1.49  | (0.77-2.2)    | <b>4.63E-05</b> | <b>1.14E-04</b> | -0.84 | (-1.68--0.01) | <b>4.75E-02</b> | 9.00E-02        | GUSTO only    | -1.53 | (-2.1--0.95)  | <b>2.07E-07</b> | <b>5.95E-07</b> |
| GM3(d18:1/18:0)               | -0.02 | (-0.71-0.69)  | 9.64E-01        | 9.70E-01        | GUSTO only    | -0.74 | (-1.16--0.31) | <b>6.75E-04</b> | <b>1.29E-03</b> | -0.21 | (-0.72-0.3)   | 4.26E-01        | 5.26E-01        | GUSTO only    | -0.44 | (-0.83--0.05) | <b>2.56E-02</b> | <b>4.11E-02</b> |
| GM3(d18:1/22:0)               | -0.33 | (-1.15-0.5)   | 4.39E-01        | 5.25E-01        | GUSTO only    | -1.50 | (-2--1.01)    | <b>2.53E-09</b> | <b>1.37E-08</b> | 0.64  | (0.01-1.28)   | <b>4.78E-02</b> | 9.02E-02        | notSig        | 0.49  | (-0.05-1.03)  | 7.66E-02        | 1.07E-01        |
| GM3(d18:1/24:0)               | -1.84 | (-2.77--0.89) | <b>1.55E-04</b> | <b>6.37E-04</b> | GUSTO and BIS | -2.77 | (-3.29--2.26) | <b>4.58E-26</b> | <b>4.25E-24</b> | 0.66  | (-0.03-1.34)  | 6.13E-02        | 1.11E-01        | notSig        | 0.17  | (-0.35-0.69)  | 5.23E-01        | 5.78E-01        |
| GM3(d18:1/24:1)               | 0.52  | (-0.34-1.39)  | 2.33E-01        | 3.19E-01        | GUSTO only    | -1.03 | (-1.52--0.54) | <b>3.56E-05</b> | <b>8.91E-05</b> | 0.63  | (-0.08-1.33)  | 8.00E-02        | 1.35E-01        | notSig        | 0.33  | (-0.2-0.87)   | 2.25E-01        | 2.80E-01        |
| HexCer(d16:1/22:0)            | -1.53 | (-2.4--0.64)  | <b>7.70E-04</b> | <b>2.57E-03</b> | GUSTO and BIS | -1.66 | (-2.18--1.14) | <b>2.92E-10</b> | <b>1.78E-09</b> | 0.04  | (-0.72-0.8)   | 9.15E-01        | 9.33E-01        | notSig        | -0.14 | (-0.8-0.52)   | 6.77E-01        | 7.26E-01        |
| HexCer(d16:1/24:0)            | -2.20 | (-3.04--1.34) | <b>6.57E-07</b> | <b>6.22E-06</b> | GUSTO and BIS | -2.85 | (-3.36--2.33) | <b>4.63E-27</b> | <b>5.37E-25</b> | -0.22 | (-0.88-0.43)  | 5.02E-01        | 6.05E-01        | notSig        | -0.37 | (-0.94-0.2)   | 2.04E-01        | 2.58E-01        |
| HexCer(d18:1/16:0)            | -0.69 | (-1.48-0.12)  | 9.39E-02        | 1.50E-01        | GUSTO only    | -1.15 | (-1.56--0.73) | <b>6.18E-08</b> | <b>2.68E-07</b> | 0.77  | (-0.04-1.59)  | 6.35E-02        | 1.14E-01        | notSig        | 0.38  | (-0.2-0.97)   | 2.00E-01        | 2.54E-01        |
| HexCer(d18:1/18:0)            | -0.24 | (-1.08-0.6)   | 5.71E-01        | 6.49E-01        | GUSTO only    | -1.12 | (-1.61--0.64) | <b>4.85E-06</b> | <b>1.43E-05</b> | 0.52  | (-0.31-1.36)  | 2.17E-01        | 3.13E-01        | notSig        | 0.43  | (-0.22-1.09)  | 1.95E-01        | 2.48E-01        |
| HexCer(d18:1/20:0)            | -0.19 | (-1-0.62)     | 6.41E-01        | 7.08E-01        | GUSTO only    | -1.30 | (-1.77--0.84) | <b>3.73E-08</b> | <b>1.65E-07</b> | 0.82  | (0.13-1.52)   | <b>2.02E-02</b> | <b>4.27E-02</b> | BIS only      | 0.56  | (0-1.13)      | 5.02E-02        | 7.41E-02        |
| HexCer(d18:1/22:0)            | -0.93 | (-1.75--0.11) | <b>2.73E-02</b> | 5.29E-02        | GUSTO only    | -1.67 | (-2.09--1.24) | <b>1.38E-14</b> | <b>1.73E-13</b> | 0.58  | (-0.08-1.25)  | 8.55E-02        | 1.42E-01        | notSig        | 0.55  | (0.04-1.05)   | <b>3.43E-02</b> | 5.36E-02        |
| HexCer(d18:1/24:0)            | -1.88 | (-2.65--1.1)  | <b>3.16E-06</b> | <b>2.48E-05</b> | GUSTO and BIS | -2.38 | (-2.81--1.96) | <b>2.66E-28</b> | <b>4.11E-26</b> | 0.43  | (-0.2-1.06)   | 1.81E-01        | 2.70E-01        | notSig        | 0.28  | (-0.2-0.77)   | 2.53E-01        | 3.08E-01        |
| HexCer(d18:1/24:1)            | 0.03  | (-0.79-0.85)  | 9.46E-01        | 9.64E-01        | GUSTO only    | -1.14 | (-1.6--0.69)  | <b>1.02E-06</b> | <b>3.25E-06</b> | 0.95  | (0.32-1.58)   | <b>3.02E-03</b> | <b>8.10E-03</b> | BIS only      | 0.80  | (0.31-1.3)    | <b>1.40E-03</b> | <b>2.76E-03</b> |
| Hex2Cer(d16:1/16:0)           | -1.54 | (-2.44--0.63) | <b>9.65E-04</b> | <b>3.07E-03</b> | GUSTO and BIS | -1.38 | (-1.89--0.86) | <b>1.56E-07</b> | <b>6.30E-07</b> | -0.60 | (-1.45-0.24)  | 1.62E-01        | 2.46E-01        | notSig        | -0.78 | (-1.43--0.13) | <b>1.95E-02</b> | <b>3.22E-02</b> |
| Hex2Cer(d18:1/16:0)           | -1.32 | (-2.07--0.57) | <b>6.43E-04</b> | <b>2.23E-03</b> | GUSTO and BIS | -1.49 | (-1.92--1.06) | <b>9.38E-12</b> | <b>7.64E-11</b> | 0.04  | (-0.72-0.81)  | 9.10E-01        | 9.30E-01        | notSig        | -0.27 | (-0.79-0.25)  | 3.08E-01        | 3.66E-01        |
| Hex2Cer(d18:1/22:0)           | -1.01 | (-1.72--0.3)  | <b>5.74E-03</b> | <b>1.42E-02</b> | GUSTO and BIS | -1.46 | (-1.9--1.02)  | <b>7.22E-11</b> | <b>4.93E-10</b> | 0.31  | (-0.35-0.98)  | 3.56E-01        | 4.63E-01        | notSig        | 0.13  | (-0.41-0.66)  | 6.38E-01        | 6.88E-01        |
| Hex2Cer(d18:1/24:1)           | -0.33 | (-1.2-0.54)   | 4.53E-01        | 5.34E-01        | GUSTO only    | -1.25 | (-1.74--0.76) | <b>5.00E-07</b> | <b>1.79E-06</b> | 0.64  | (-0.13-1.41)  | 1.05E-01        | 1.69E-01        | notSig        | 0.27  | (-0.29-0.83)  | 3.45E-01        | 4.03E-01        |
| Hex2Cer(d18:2/16:0)           | -0.40 | (-1.18-0.39)  | 3.22E-01        | 4.14E-01        | GUSTO only    | -0.58 | (-1.03--0.13) | <b>1.10E-02</b> | <b>1.70E-02</b> | 0.11  | (-0.58-0.79)  | 7.57E-01        | 8.19E-01        | notSig        | -0.14 | (-0.66-0.38)  | 5.94E-01        | 6.52E-01        |
| Hex3Cer(d18:1/16:0)           | -0.40 | (-0.95-0.16)  | 1.58E-01        | 2.31E-01        | GUSTO only    | -0.81 | (-1.14--0.47) | <b>2.22E-06</b> | <b>6.97E-06</b> | 0.01  | (-0.48-0.49)  | 9.79E-01        | 9.79E-01        | notSig        | -0.19 | (-0.56-0.19)  | 3.31E-01        | 3.90E-01        |
| Hex3Cer(d18:1/22:0)           | -1.08 | (-1.75--0.4)  | <b>1.90E-03</b> | <b>5.59E-03</b> | GUSTO and BIS | -1.33 | (-1.78--0.88) | <b>6.73E-09</b> | <b>3.32E-08</b> | 0.01  | (-0.65-0.67)  | 9.71E-01        | 9.73E-01        | notSig        | 0.05  | (-0.5-0.6)    | 8.47E-01        | 8.83E-01        |
| Hex3Cer(d18:1/24:0)           | -1.93 | (-2.71--1.15) | <b>1.79E-06</b> | <b>1.49E-05</b> | GUSTO and BIS | -1.70 | (-2.16--1.23) | <b>7.77E-13</b> | <b>7.07E-12</b> | -0.22 | (-0.88-0.44)  | 5.11E-01        | 6.06E-01        | notSig        | -0.32 | (-0.82-0.19)  | 2.19E-01        | 2.73E-01        |
| Hex3Cer(d18:1/24:1)           | -0.24 | (-0.86-0.38)  | 4.48E-01        | 5.34E-01        | GUSTO only    | -0.74 | (-1.15--0.33) | <b>4.43E-04</b> | <b>8.90E-04</b> | 0.24  | (-0.35-0.84)  | 4.19E-01        | 5.20E-01        | notSig        | -0.05 | (-0.52-0.42)  | 8.32E-01        | 8.71E-01        |
| SM(d17:1/14:0)                | -1.42 | (-2.13--0.7)  | <b>1.29E-04</b> | <b>5.48E-04</b> | GUSTO and BIS | -1.70 | (-2.15--1.25) | <b>9.43E-14</b> | <b>9.72E-13</b> | -0.42 | (-1.05-0.22)  | 1.98E-01        | 2.88E-01        | GUSTO only    | -0.75 | (-1.15--0.35) | <b>2.76E-04</b> | <b>6.11E-04</b> |
| SM(d18:0/14:0)                | -1.55 | (-2.31--0.78) | <b>8.10E-05</b> | <b>3.72E-04</b> | GUSTO and BIS | -1.11 | (-1.54--0.67) | <b>6.32E-07</b> | <b>2.19E-06</b> | 0.89  | (0.31-1.46)   | <b>2.43E-03</b> | <b>6.76E-03</b> | BIS only      | 0.26  | (-0.12-0.65)  | 1.80E-01        | 2.30E-01        |
| SM(d18:1/14:0)/SM(d16:1/16:0) | -1.10 | (-1.73--0.47) | <b>6.97E-04</b> | <b>2.36E-03</b> | GUSTO and BIS | -1.05 | (-1.43--0.67) | <b>5.15E-08</b> | <b>2.26E-07</b> | 0.08  | (-0.57-0.72)  | 8.17E-01        | 8.70E-01        | notSig        | -0.31 | (-0.71-0.09)  | 1.27E-01        | 1.72E-01        |
| SM(d18:2/14:0)                | -0.28 | (-0.89-0.34)  | 3.76E-01        | 4.67E-01        | notSig        | -0.01 | (-0.4-0.38)   | 9.66E-01        | 9.72E-01        | 0.75  | (0.16-1.34)   | <b>1.23E-02</b> | <b>2.76E-02</b> | BIS only      | 0.39  | (-0.01-0.79)  | 5.77E-02        | 8.32E-02        |
| SM(d17:1/16:0)                | -0.17 | (-0.81-0.47)  | 5.97E-01        | 6.69E-01        | GUSTO only    | -0.99 | (-1.37--0.62) | <b>1.39E-07</b> | <b>5.86E-07</b> | -0.43 | (-1.11-0.25)  | 2.17E-01        | 3.13E-01        | GUSTO only    | -0.79 | (-1.19--0.38) | <b>1.33E-04</b> | <b>3.06E-04</b> |
| SM(d18:1/16:0)                | -0.07 | (-0.49-0.35)  | 7.40E-01        | 8.01E-01        | GUSTO only    | -0.60 | (-0.93--0.26) | <b>4.33E-04</b> | <b>8.74E-04</b> | 0.33  | (-0.35-1.01)  | 3.45E-01        | 4.51E-01        | notSig        | -0.05 | (-0.5-0.4)    | 8.28E-01        | 8.69E-01        |
| SM(d18:2/16:0)                | 0.87  | (0.23-1.52)   | <b>7.72E-03</b> | <b>1.82E-02</b> | BIS only      | 0.30  | (-0.04-0.64)  | 8.61E-02        | 1.13E-01        | 0.84  | (0.21-1.47)   | <b>9.23E-03</b> | <b>2.21E-02</b> | BIS only      | 0.38  | (-0.02-0.78)  | 6.45E-02        | 9.18E-02        |
| SM(34:3)                      | 0.77  | (0.21-1.33)   | <b>7.00E-03</b> | <b>1.67E-02</b> | BIS only      | 0.44  | (0.08-0.8)    | <b>1.79E-02</b> | <b>2.64E-02</b> | 0.62  | (0.04-1.2)    | <b>3.50E-02</b> | 6.90E-02        | notSig        | 0.37  | (-0.03-0.78)  | 7.18E-02        | 1.01E-01        |
| SM(d18:2/17:0)                | 1.10  | (0.37-1.83)   | <b>2.94E-03</b> | <b>8.08E-03</b> | BIS only      | 0.06  | (-0.33-0.45)  | 7.71E-01        | 8.08E-01        | -0.28 | (-1-0.44)     | 4.40E-01        | 5.40E-01        | GUSTO only    | -0.70 | (-1.12--0.28) | <b>1.01E-03</b> | <b>2.05E-03</b> |
| SM(35:2) (b)                  | -0.08 | (-0.77-0.61)  | 8.19E-01        | 8.62E-01        | GUSTO only    | -0.92 | (-1.37--0.47) | <b>5.41E-05</b> | <b>1.31E-04</b> | 0.45  | (-0.67-1.57)  | 4.34E-01        | 5.34E-01        | notSig        | -0.33 | (-0.95-0.29)  | 2.97E-01        | 3.57E-01        |
| SM(d18:1/18:0)/SM(d16:1/20:0) | 1.36  | (0.58-2.14)   | <b>6.33E-04</b> | <b>2.21E-03</b> | BIS only      | 0.58  | (0.15-1)      | <b>7.96E-03</b> | <b>1.27E-02</b> | 0.86  | (0.16-1.57)   | <b>1.66E-02</b> | <b>3.61E-02</b> | BIS only      | 0.33  | (-0.13-0.78)  | 1.56E-01        | 2.03E-01        |
| SM(d18:2/18:1)                | 1.51  | (0.81-2.22)   | <b>2.36E-05</b> | <b>1.33E-04</b> | BIS only      | 0.73  | (0.33-1.12)   | <b>2.99E-04</b> | <b>6.28E-04</b> | 0.51  | (-0.23-1.24)  | 1.77E-01        | 2.65E-01        | notSig        | 0.20  | (-0.27-0.66)  | 4.07E-01        | 4.65E-01        |
| SM(37:1)                      | 0.72  | (0.06-1.39)   | <b>3.23E-02</b> | 6.17E-02        | GUSTO only    | -0.16 | (-0.58-0.26)  | 4.63E-01        | 5.19E-01        | -0.24 | (-0.98-0.51)  | 5.31E-01        | 6.18E-01        | GUSTO only    | -0.57 | (-1.06--0.08) | <b>2.27E-02</b> | <b>3.69E-02</b> |
| SM(37:2)                      | 1.13  | (0.41-1.86)   | <b>2.12E-03</b> | <b>6.10E-03</b> | GUSTO and BIS | -0.25 | (-0.71-0.22)  | 2.99E-01        | 3.49E-01        | -0.03 | (-0.78-0.72)  | 9.37E-01        | 9.51E-01        | GUSTO only    | -0.46 | (-0.94-0.01)  | 5.63E-02        | 8.17E-02        |
| SM(d18:1/20:0)/SM(d16:1/22:0) | -0.52 | (-1.21-0.19)  | 1.49E-01        | 2.20E-01        | GUSTO only    | -0.69 | (-1.05--0.33) | <b>1.72E-04</b> | <b>3.87E-04</b> | 0.95  | (0.29-1.6)    | <b>4.51E-03</b> | <b>1.18E-02</b> | BIS only      | 0.56  | (0.14-0.98)   | <b>9.74E-03</b> | <b>1.67E-02</b> |
| SM(d18:2/20:0)                | 0.62  | (0.02-1.23)   | <b>4.38E-02</b> | 7.91E-02        | notSig        | 0.04  | (-0.35-0.43)  | 8.44E-01        | 8.70E-01        | 1.12  | (0.5-1.74)    | <b>3.98E-04</b> | <b>1.35E-03</b> | BIS only      | 0.80  | (0.32-1.28)   | <b>1.13E-03</b> | <b>2.26E-03</b> |
| SM(38:3) (a)                  | 0.95  | (0.22-1.68)   | <b>1.03E-02</b> | <b>2.35E-02</b> | BIS only      | 0.63  | (0.23-1.04)   | <b>2.25E-03</b> | <b>4.00E-03</b> | 0.02  | (-0.59-0.63)  | 9.52E-01        | 9.60E-01        | notSig        | -0.27 | (-0.69-0.14)  | 1.91E-01        | 2.44E-01        |
| SM(38:3) (b)                  | 0.82  | (0.14-1.51)   | <b>1.79E-02</b> | <b>3.72E-02</b> | GUSTO and BIS | -0.14 | (-0.57-0.29)  | 5.33E-01        | 5.95E-01        | 0.49  | (-0.19-1.16)  | 1.57E-01        | 2.39E-01        | notSig        | 0.23  | (-0.27-0.73)  | 3.61E-01        | 4.17E-01        |
| SM(d16:1/23:0)/SM(d17:1/22:0) | -0.81 | (-1.51--0.11) | <b>2.40E-02</b> | <b>4.72E-02</b> | GUSTO and BIS | -1.00 | (-1.39--0.61) | <b>4.10E-07</b> | <b>1.50E-06</b> | -0.17 | (-0.93-0.59)  | 6.58E-01        | 7.31E-01        | notSig        | -0.30 | (-0.74-0.13)  | 1.70E-01        | 2.20E-01        |
| SM(d18:1/22:0)/SM(d16:1/24:0) | -0.35 | (-0.91-0.21)  | 2.15E-01        | 2.98E-01        | GUSTO only    | -0.50 | (-0.85--0.14) | <b>6.67E-03</b> | <b>1.08E-02</b> | 0.93  | (0.32-1.54)   | <b>2.75E-03</b> | <b>7.50E-03</b> | BIS only      | 0.65  | (0.23-1.07)   | <b>2.40E-03</b> | <b>4.59E-03</b> |
| SM(d16:1/24:1)                | 0.46  | (-0           |                 |                 |               |       |               |                 |                 |       |               |                 |                 |               |       |               |                 |                 |

|                                           |       |               |                 |                    |               |       |               |                 |                 |       |              |                 |                 |               |       |               |                 |                 |
|-------------------------------------------|-------|---------------|-----------------|--------------------|---------------|-------|---------------|-----------------|-----------------|-------|--------------|-----------------|-----------------|---------------|-------|---------------|-----------------|-----------------|
| SM(40:3) (b)                              | 0.28  | (-0.35-0.91)  | 3.88E-01        | 4.75E-01           | GUSTO only    | -0.40 | (-0.81-0.02)  | 5.95E-02        | 8.08E-02        | -0.34 | (-1.01-0.33) | 3.14E-01        | 4.17E-01        | GUSTO only    | -0.64 | (-1.1--0.18)  | <b>6.75E-03</b> | <b>1.20E-02</b> |
| SM(41:0)                                  | -0.44 | (-1.14-0.28)  | 2.30E-01        | 3.17E-01           | notSig        | -0.42 | (-0.79--0.06) | <b>2.26E-02</b> | <b>3.26E-02</b> | 0.07  | (-0.52-0.66) | 8.09E-01        | 8.65E-01        | notSig        | -0.10 | (-0.59-0.4)   | 6.99E-01        | 7.46E-01        |
| SM(d17:1/24:1)                            | 1.08  | (0.45-1.71)   | <b>7.28E-04</b> | <b>2.45E-03</b>    | GUSTO and BIS | -0.20 | (-0.57-0.17)  | 2.90E-01        | 3.40E-01        | -0.05 | (-0.72-0.61) | 8.76E-01        | 9.06E-01        | notSig        | -0.30 | (-0.73-0.13)  | 1.66E-01        | 2.16E-01        |
| SM(d18:2/23:0)                            | -0.44 | (-1.06-0.18)  | 1.65E-01        | 2.40E-01           | GUSTO only    | -0.77 | (-1.13--0.42) | <b>1.63E-05</b> | <b>4.54E-05</b> | 0.12  | (-0.67-0.9)  | 7.74E-01        | 8.31E-01        | notSig        | 0.04  | (-0.48-0.56)  | 8.69E-01        | 8.96E-01        |
| SM(d18:1/24:0)                            | -0.89 | (-1.51--0.26) | <b>5.55E-03</b> | <b>1.38E-02</b>    | GUSTO and BIS | -1.26 | (-1.63--0.9)  | <b>1.68E-11</b> | <b>1.28E-10</b> | 0.41  | (-0.15-0.98) | 1.51E-01        | 2.31E-01        | notSig        | 0.09  | (-0.31-0.5)   | 6.52E-01        | 7.01E-01        |
| SM(d18:1/24:1)                            | 1.63  | (0.99-2.28)   | <b>7.44E-07</b> | <b>6.77E-06</b>    | BIS only      | 0.34  | (-0.08-0.75)  | 1.10E-01        | 1.40E-01        | 1.08  | (0.42-1.74)  | <b>1.41E-03</b> | <b>4.28E-03</b> | BIS only      | 0.61  | (0.16-1.05)   | <b>7.53E-03</b> | <b>1.32E-02</b> |
| SM(d18:2/24:0)                            | -0.90 | (-1.47--0.32) | <b>2.29E-03</b> | <b>6.51E-03</b>    | GUSTO and BIS | -1.28 | (-1.61--0.95) | <b>6.62E-14</b> | <b>7.15E-13</b> | 0.33  | (-0.26-0.91) | 2.72E-01        | 3.72E-01        | notSig        | 0.10  | (-0.31-0.51)  | 6.21E-01        | 6.75E-01        |
| SM(43:1)                                  | -0.30 | (-0.92-0.33)  | 3.52E-01        | 4.40E-01           | GUSTO only    | -1.13 | (-1.51--0.75) | <b>4.63E-09</b> | <b>2.33E-08</b> | -0.82 | (-1.44--0.2) | <b>9.72E-03</b> | <b>2.30E-02</b> | GUSTO and BIS | -0.91 | (-1.39--0.43) | <b>1.78E-04</b> | <b>4.01E-04</b> |
| SM(44:1)                                  | -0.70 | (-1.29--0.11) | <b>2.04E-02</b> | <b>4.08E-02</b>    | GUSTO and BIS | -1.29 | (-1.63--0.95) | <b>1.41E-13</b> | <b>1.39E-12</b> | -0.28 | (-0.86-0.29) | 3.34E-01        | 4.37E-01        | notSig        | -0.40 | (-0.78--0.01) | <b>4.33E-02</b> | 6.53E-02        |
| SM(44:2)                                  | 1.12  | (0.47-1.76)   | <b>6.60E-04</b> | <b>2.25E-03</b>    | GUSTO and BIS | -0.29 | (-0.68-0.1)   | 1.49E-01        | 1.86E-01        | 0.42  | (-0.11-0.94) | 1.20E-01        | 1.86E-01        | notSig        | 0.10  | (-0.27-0.47)  | 6.00E-01        | 6.55E-01        |
| LPC(14:0) [sn2]                           | -2.10 | (-3.31--0.87) | <b>8.49E-04</b> | <b>2.79E-03</b>    | BIS only      | -1.12 | (-1.78--0.47) | <b>7.98E-04</b> | <b>1.51E-03</b> | 1.68  | (0.89-2.47)  | <b>3.30E-05</b> | <b>1.46E-04</b> | GUSTO and BIS | 1.73  | (1.3-2.15)    | <b>1.87E-15</b> | <b>9.76E-15</b> |
| LPC(14:0) [sn1]                           | -1.99 | (-3.28--0.68) | <b>3.01E-03</b> | <b>8.16E-03</b>    | BIS only      | -0.81 | (-1.46--0.16) | <b>1.44E-02</b> | <b>2.17E-02</b> | 1.55  | (0.71-2.39)  | <b>2.92E-04</b> | <b>1.04E-03</b> | GUSTO and BIS | 1.60  | (1.18-2.02)   | <b>8.50E-14</b> | <b>4.07E-13</b> |
| LPC(15:0) [sn2]                           | -0.51 | (-1.43-0.42)  | 2.83E-01        | 3.74E-01           | GUSTO only    | -1.19 | (-1.71--0.68) | <b>5.38E-06</b> | <b>1.57E-05</b> | 0.55  | (-0.08-1.19) | 8.88E-02        | 1.46E-01        | GUSTO only    | 0.81  | (0.37-1.25)   | <b>2.70E-04</b> | <b>5.99E-04</b> |
| LPC(15:0) [sn1]                           | -0.33 | (-1.25-0.6)   | 4.82E-01        | 5.65E-01           | GUSTO only    | -1.03 | (-1.5--0.55)  | <b>2.44E-05</b> | <b>6.69E-05</b> | 0.56  | (-0.05-1.17) | 7.21E-02        | 1.25E-01        | GUSTO only    | 0.67  | (0.27-1.08)   | <b>1.11E-03</b> | <b>2.24E-03</b> |
| LPC(16:0) [sn2]                           | 0.65  | (-0.51-1.83)  | 2.72E-01        | 3.62E-01           | notSig        | 0.07  | (-0.35-0.49)  | 7.40E-01        | 7.82E-01        | 1.29  | (0.69-1.9)   | <b>3.05E-05</b> | <b>1.36E-04</b> | GUSTO and BIS | 1.56  | (1.18-1.93)   | <b>4.22E-16</b> | <b>2.30E-15</b> |
| LPC(16:0) [sn1]                           | 0.53  | (-0.46-1.54)  | 2.93E-01        | 3.85E-01           | notSig        | 0.32  | (-0.15-0.79)  | 1.77E-01        | 2.18E-01        | 1.48  | (0.9-2.07)   | <b>6.48E-07</b> | <b>4.18E-06</b> | GUSTO and BIS | 1.71  | (1.3-2.13)    | <b>3.21E-16</b> | <b>1.80E-15</b> |
| LPC(16:1) [sn2]                           | 0.61  | (-0.5-1.73)   | 2.85E-01        | 3.76E-01           | notSig        | 0.30  | (-0.3-0.91)   | 3.28E-01        | 3.76E-01        | 2.89  | (1.95-3.83)  | <b>2.73E-09</b> | <b>2.53E-08</b> | GUSTO and BIS | 3.57  | (2.98-4.16)   | <b>1.72E-32</b> | <b>2.16E-31</b> |
| LPC(16:1) [sn1]                           | 0.73  | (-0.29-1.76)  | 1.59E-01        | 2.32E-01           | notSig        | 0.45  | (-0.09-0.98)  | 1.03E-01        | 1.34E-01        | 2.96  | (2.03-3.89)  | <b>7.73E-10</b> | <b>7.77E-09</b> | GUSTO and BIS | 3.55  | (2.98-4.11)   | <b>5.45E-35</b> | <b>8.44E-34</b> |
| LPC(15-MHDA) [sn2]                        | 0.45  | (-0.61-1.51)  | 4.06E-01        | 4.92E-01           | GUSTO only    | -0.74 | (-1.35--0.13) | <b>1.72E-02</b> | <b>2.55E-02</b> | -0.05 | (-0.69-0.59) | 8.75E-01        | 9.06E-01        | notSig        | 0.25  | (-0.28-0.78)  | 3.50E-01        | 4.08E-01        |
| LPC(15-MHDA) [sn1] / LPC(17:0) [sn2]      | 0.45  | (-0.55-1.46)  | 3.78E-01        | 4.68E-01           | GUSTO only    | -0.75 | (-1.29--0.21) | <b>6.36E-03</b> | <b>1.04E-02</b> | -0.22 | (-0.8-0.37)  | 4.69E-01        | 5.67E-01        | notSig        | 0.09  | (-0.36-0.54)  | 6.96E-01        | 7.44E-01        |
| LPC(17:0) [sn1]                           | 0.29  | (-0.69-1.29)  | 5.63E-01        | 6.43E-01           | GUSTO only    | -0.65 | (-1.1--0.21)  | <b>4.11E-03</b> | <b>7.01E-03</b> | -0.29 | (-0.84-0.26) | 2.96E-01        | 3.98E-01        | notSig        | -0.03 | (-0.4-0.33)   | 8.60E-01        | 8.91E-01        |
| LPC(17:1) [sn1] (a) / LPC(17:1) [sn2] (b) | 0.15  | (-0.79-1.09)  | 7.59E-01        | 8.13E-01           | GUSTO only    | -0.65 | (-1.14--0.16) | <b>8.94E-03</b> | <b>1.41E-02</b> | 1.44  | (0.79-2.09)  | <b>1.69E-05</b> | <b>7.90E-05</b> | GUSTO and BIS | 1.58  | (1.12-2.04)   | <b>1.91E-11</b> | <b>7.44E-11</b> |
| LPC(18:0) [sn2]                           | -0.33 | (-1.33-0.68)  | 5.17E-01        | 5.94E-01           | notSig        | -0.10 | (-0.53-0.32)  | 6.37E-01        | 6.89E-01        | 0.89  | (0.35-1.44)  | <b>1.42E-03</b> | <b>4.29E-03</b> | GUSTO and BIS | 0.95  | (0.59-1.3)    | <b>1.84E-07</b> | <b>5.35E-07</b> |
| LPC(18:0) [sn1]                           | -0.35 | (-1.32-0.63)  | 4.84E-01        | 5.66E-01           | notSig        | -0.09 | (-0.52-0.33)  | 6.69E-01        | 7.16E-01        | 0.85  | (0.33-1.38)  | <b>1.46E-03</b> | <b>4.34E-03</b> | GUSTO and BIS | 0.93  | (0.57-1.28)   | <b>2.85E-07</b> | <b>8.18E-07</b> |
| LPC(18:1) [sn2]                           | -0.39 | (-1.26-0.5)   | 3.91E-01        | 4.77E-01           | GUSTO only    | -0.54 | (-0.99--0.09) | <b>1.89E-02</b> | <b>2.75E-02</b> | 2.84  | (2.25-3.44)  | <b>1.23E-19</b> | <b>7.13E-18</b> | GUSTO and BIS | 3.16  | (2.7-3.62)    | <b>1.57E-41</b> | <b>3.82E-40</b> |
| LPC(18:1) [sn1]                           | -0.58 | (-1.49-0.33)  | 2.12E-01        | 2.94E-01           | notSig        | -0.52 | (-0.93--0.1)  | <b>1.41E-02</b> | <b>2.14E-02</b> | 2.62  | (2.09-3.14)  | <b>3.10E-21</b> | <b>3.59E-19</b> | GUSTO and BIS | 2.92  | (2.52-3.33)   | <b>2.29E-45</b> | <b>8.85E-44</b> |
| LPC(18:2) [sn2]                           | -1.39 | (-2.25--0.52) | <b>1.86E-03</b> | <b>5.49E-03</b>    | GUSTO and BIS | -0.82 | (-1.25--0.4)  | <b>1.53E-04</b> | <b>3.47E-04</b> | 1.91  | (1.24-2.58)  | <b>3.10E-08</b> | <b>2.48E-07</b> | GUSTO and BIS | 2.38  | (1.88-2.87)   | <b>4.09E-21</b> | <b>2.88E-20</b> |
| LPC(18:2) [sn1]                           | -2.03 | (-3.05--1.01) | <b>1.15E-04</b> | <b>5.02E-04</b>    | BIS only      | -0.77 | (-1.26--0.29) | <b>1.68E-03</b> | <b>3.01E-03</b> | 2.34  | (1.63-3.05)  | <b>1.96E-10</b> | <b>2.46E-09</b> | GUSTO and BIS | 2.63  | (2.11-3.14)   | <b>1.05E-23</b> | <b>8.71E-23</b> |
| LPC(18:3) [sn2] (a)                       | -2.89 | (-3.97--1.8)  | <b>3.23E-07</b> | <b>3.56E-06</b>    | GUSTO and BIS | -1.93 | (-2.52--1.35) | <b>8.77E-11</b> | <b>5.81E-10</b> | 1.44  | (0.78-2.1)   | <b>1.95E-05</b> | <b>8.96E-05</b> | GUSTO and BIS | 1.86  | (1.39-2.33)   | <b>1.30E-14</b> | <b>6.55E-14</b> |
| LPC(18:3) [sn1] (a)/LPC(18:3) [sn2] (b)   | -3.07 | (-4.21--1.91) | <b>3.18E-07</b> | <b>3.56E-06</b>    | GUSTO and BIS | -1.54 | (-2.15--0.94) | <b>6.54E-07</b> | <b>2.25E-06</b> | 2.68  | (1.97-3.39)  | <b>2.83E-13</b> | <b>4.86E-12</b> | GUSTO and BIS | 3.30  | (2.73-3.87)   | <b>4.86E-30</b> | <b>5.64E-29</b> |
| LPC(18:3) (a) [sn1] [104_sn1]             | -3.24 | (-4.4--2.07)  | <b>1.01E-07</b> | <b>1.31E-06</b>    | GUSTO and BIS | -1.61 | (-2.24--0.98) | <b>4.79E-07</b> | <b>1.74E-06</b> | 2.20  | (1.47-2.94)  | <b>5.05E-09</b> | <b>4.51E-08</b> | GUSTO and BIS | 2.94  | (2.37-3.51)   | <b>4.30E-24</b> | <b>3.63E-23</b> |
| LPC(19:0) [sn1] (a) / LPC(19:0) [sn2] (b) | -0.92 | (-1.88-0.05)  | 6.18E-02        | 1.08E-01           | GUSTO only    | -1.44 | (-1.86--1.02) | <b>2.14E-11</b> | <b>1.58E-10</b> | -0.48 | (-1.35-0.39) | 2.78E-01        | 3.80E-01        | notSig        | -0.33 | (-0.84-0.19)  | 2.15E-01        | 2.69E-01        |
| LPC(20:0) [sn1]                           | -1.33 | (-2.16--0.49) | <b>1.99E-03</b> | <b>5.76E-03</b>    | GUSTO and BIS | -1.53 | (-1.92--1.13) | <b>3.37E-14</b> | <b>3.72E-13</b> | 0.46  | (-0.04-0.95) | 7.18E-02        | 1.25E-01        | notSig        | 0.36  | (0.04-0.69)   | <b>2.75E-02</b> | <b>4.39E-02</b> |
| LPC(20:1) [sn2]                           | -0.35 | (-1.31-0.61)  | 4.75E-01        | 5.57E-01           | GUSTO only    | -0.56 | (-0.97--0.14) | <b>8.81E-03</b> | <b>1.40E-02</b> | 1.81  | (1.3-2.32)   | <b>9.50E-12</b> | <b>1.42E-10</b> | GUSTO and BIS | 1.63  | (1.26-2)      | <b>3.73E-18</b> | <b>2.19E-17</b> |
| LPC(20:1) [sn1]                           | -0.33 | (-1.29-0.64)  | 5.00E-01        | 5.78E-01           | GUSTO only    | -0.56 | (-0.98--0.15) | <b>8.30E-03</b> | <b>1.32E-02</b> | 1.58  | (1.09-2.08)  | <b>5.70E-10</b> | <b>5.87E-09</b> | GUSTO and BIS | 1.67  | (1.32-2.02)   | <b>8.39E-21</b> | <b>5.73E-20</b> |
| LPC(20:2) [sn2]                           | -1.74 | (-2.63--0.84) | <b>1.77E-04</b> | <b>7.21E-04</b>    | GUSTO and BIS | -1.11 | (-1.55--0.67) | <b>8.29E-07</b> | <b>2.77E-06</b> | 2.44  | (1.88-2.99)  | <b>5.34E-17</b> | <b>1.77E-15</b> | GUSTO and BIS | 2.89  | (2.44-3.35)   | <b>1.77E-35</b> | <b>2.94E-34</b> |
| LPC(20:2) [sn1]                           | -1.58 | (-2.61--0.53) | <b>3.24E-03</b> | <b>8.75E-03</b>    | GUSTO and BIS | -0.80 | (-1.23--0.36) | <b>3.01E-04</b> | <b>6.28E-04</b> | 2.42  | (1.89-2.96)  | <b>8.39E-18</b> | <b>3.54E-16</b> | GUSTO and BIS | 2.77  | (2.34-3.2)    | <b>7.23E-37</b> | <b>1.46E-35</b> |
| LPC(20:3) [sn2]                           | -0.47 | (-1.38-0.45)  | 3.11E-01        | 4.03E-01           | GUSTO only    | 0.54  | (0.01-1.07)   | <b>4.59E-02</b> | 6.33E-02        | 2.08  | (1.43-2.72)  | <b>4.52E-10</b> | <b>4.77E-09</b> | GUSTO and BIS | 2.31  | (1.84-2.78)   | <b>1.04E-21</b> | <b>7.53E-21</b> |
| LPC(20:3) [sn1]                           | -0.76 | (-1.88-0.37)  | 1.87E-01        | 2.68E-01           | GUSTO only    | 0.72  | (0.13-1.31)   | <b>1.68E-02</b> | <b>2.50E-02</b> | 2.31  | (1.62-3)     | <b>1.12E-10</b> | <b>1.44E-09</b> | GUSTO and BIS | 2.74  | (2.23-3.26)   | <b>8.02E-26</b> | <b>7.59E-25</b> |
| LPC(20:4) [sn2]                           | 1.07  | (0.19-1.95)   | <b>1.72E-02</b> | <b>3.61E-02</b>    | GUSTO and BIS | 0.91  | (0.46-1.36)   | <b>8.01E-05</b> | <b>1.90E-04</b> | 1.48  | (0.77-2.19)  | <b>4.40E-05</b> | <b>1.84E-04</b> | GUSTO and BIS | 1.97  | (1.49-2.45)   | <b>7.76E-16</b> | <b>4.09E-15</b> |
| LPC(20:4) [sn1]                           | 1.02  | (-0.05-2.11)  | 6.15E-02        | 1.08E-01           | GUSTO only    | 1.29  | (0.78-1.79)   | <b>6.11E-07</b> | <b>2.13E-06</b> | 1.68  | (0.89-2.48)  | <b>3.65E-05</b> | <b>1.55E-04</b> | GUSTO and BIS | 2.24  | (1.71-2.76)   | <b>5.90E-17</b> | <b>3.34E-16</b> |
| LPC(20:5) [sn2]                           | -0.56 | (-1.89-0.78)  | 4.12E-01        | 4.96E-01           | notSig        | -0.25 | (-1.09-0.6)   | 5.65E-01        | 6.24E-01        | 0.81  | (-0.06-1.68) | 6.85E-02        | 1.20E-01        | notSig        | 0.68  | (-0.01-1.37)  | 5.49E-02        | 7.99E-02        |
| LPC(20:5) [sn1]                           | -0.74 | (-2.22-0.76)  | 3.33E-01        | 4.21E-01           | notSig        | -0.12 | (-1.01-0.78)  | 8.01E-01        | 8.31E-01        | 1.19  | (0.3-2.09)   | <b>8.96E-03</b> | <b>2.16E-02</b> | BIS only      | 0.98  | (0.27-1.68)   | <b>6.65E-03</b> | <b>1.19E-02</b> |
| LPC(22:4) [sn2]                           | -1.14 | (-2.14--0.13) | <b>2.65E-02</b> | 5.17E-02           | notSig        | -0.66 | (-1.19--0.12) | <b>1.61E-02</b> | <b>2.41E-02</b> | 1.74  | (1.19-2.3)   | <b>1.31E-09</b> | <b>1.25E-08</b> | GUSTO and BIS | 2.03  | (1.59-2.47)   | <b>1.55E-19</b> | <b>9.70E-19</b> |
| LPC(22:4) [sn1]                           | -1.20 | (-2.44-0.06)  | 6.15E-02        | 1.08E-01           | notSig        | -0.22 | (-0.77-0.34)  | 4.42E-01        | 5.03E-01        | 1.82  | (1.21-2.43)  | <b>7.00E-09</b> | <b>6.01E-08</b> | GUSTO and BIS | 2.22  | (1.76-2.67)   | <b>8.20E-22</b> | <b>6.04E-21</b> |
| LPC(22:5) [sn2] (n3)                      | -1.45 | (-2.43--0.45) | <b>4.51E-03</b> | <b>1.18E-02</b>    | GUSTO and BIS | -1.11 | (-1.64--0.58) | <b>3.57E-05</b> | <b>8.91E-05</b> | 0.85  | (0.22-1.49)  | <b>8.51E-03</b> | <b>2.06E-02</b> | GUSTO and BIS | 1.16  | (0.65-1.67)   | <b>9.48E-06</b> | <b>2.40E-05</b> |
| LPC(22:5) [sn1] (n3)/LPC(22:5) [sn2] (n6) | -1.50 | (-2.61--0.38) | <b>8.68E-03</b> | <b>2.00E-02</b>    | GUSTO and BIS | -0.98 | (-1.5--0.47)  | <b>1.77E-04</b> | <b>3.96E-04</b> | 1.76  | (1.17-2.35)  | <b>6.68E-09</b> | <b>5.84E-08</b> | GUSTO and BIS | 1.90  | (1.45-2.36)   | <b>4.33E-16</b> | <b>2.34E-15</b> |
| LPC(22:5) [sn1] (n6)                      | -1.52 | (-2.78--0.24) | <b>2.03E-02</b> | <b>4.08E-02</b>    | BIS only      | -0.80 | (-1.46--0.14) | <b>1.81E-02</b> | <b>2.65E-02</b> | 3.06  | (2.26-3.87)  | <b>2.41E-13</b> | <b>4.31E-12</b> | GUSTO and BIS | 3.50  | (2.83-4.17)   | <b>1.21E-24</b> | <b>1.08E-23</b> |
| LPC(22:5) (n3) [sn1] [104_sn1]            | -1.52 | (-2.73--0.29) | <b>1.54E-02</b> | <b>3.28E-02</b> </ |               |       |               |                 |                 |       |              |                 |                 |               |       |               |                 |                 |



|                   |       |               |                 |                 |               |       |               |                 |                 |       |              |                 |                 |               |       |               |                 |                 |
|-------------------|-------|---------------|-----------------|-----------------|---------------|-------|---------------|-----------------|-----------------|-------|--------------|-----------------|-----------------|---------------|-------|---------------|-----------------|-----------------|
| LPC(O-18:0)       | -1.41 | (-2.38--0.42) | <b>5.26E-03</b> | <b>1.33E-02</b> | GUSTO and BIS | -1.13 | (-1.61--0.66) | <b>3.08E-06</b> | <b>9.53E-06</b> | 0.93  | (0.4-1.46)   | <b>6.44E-04</b> | <b>2.08E-03</b> | BIS only      | 0.63  | (0.24-1.02)   | <b>1.54E-03</b> | <b>3.02E-03</b> |
| LPC(O-18:1)       | 0.37  | (-0.67-1.41)  | 4.87E-01        | 5.68E-01        | GUSTO only    | 0.49  | (0.08-0.91)   | <b>1.91E-02</b> | <b>2.76E-02</b> | 1.64  | (1.13-2.15)  | <b>4.02E-10</b> | <b>4.44E-09</b> | GUSTO and BIS | 1.73  | (1.36-2.1)    | <b>2.94E-20</b> | <b>1.98E-19</b> |
| LPC(O-20:0)       | -2.20 | (-3.04--1.36) | <b>4.96E-07</b> | <b>5.01E-06</b> | GUSTO and BIS | -1.84 | (-2.27--1.4)  | <b>1.96E-16</b> | <b>3.63E-15</b> | 0.94  | (0.46-1.42)  | <b>1.27E-04</b> | <b>4.82E-04</b> | BIS only      | 0.73  | (0.31-1.14)   | <b>6.82E-04</b> | <b>1.43E-03</b> |
| LPC(O-20:1)       | -0.83 | (-1.85-0.21)  | 1.16E-01        | 1.79E-01        | notSig        | -0.13 | (-0.79-0.53)  | 6.96E-01        | 7.43E-01        | 1.51  | (1-2.02)     | <b>8.84E-09</b> | <b>7.46E-08</b> | GUSTO and BIS | 1.74  | (1.28-2.19)   | <b>1.00E-13</b> | <b>4.74E-13</b> |
| LPC(O-22:0)       | -2.49 | (-3.23--1.75) | <b>1.17E-10</b> | <b>5.76E-09</b> | GUSTO and BIS | -2.43 | (-2.83--2.02) | <b>1.03E-31</b> | <b>2.39E-29</b> | 0.42  | (0-0.85)     | 5.17E-02        | 9.67E-02        | notSig        | 0.34  | (0.01-0.66)   | <b>4.09E-02</b> | 6.23E-02        |
| LPC(O-22:1)       | -1.58 | (-2.47--0.68) | <b>6.18E-04</b> | <b>2.19E-03</b> | GUSTO and BIS | -1.61 | (-2.06--1.16) | <b>2.91E-12</b> | <b>2.50E-11</b> | 1.50  | (1.01-1.99)  | <b>2.80E-09</b> | <b>2.55E-08</b> | GUSTO and BIS | 1.41  | (1.04-1.79)   | <b>1.82E-13</b> | <b>8.37E-13</b> |
| LPC(O-24:0)       | -3.03 | (-3.89--2.17) | <b>1.85E-11</b> | <b>1.87E-09</b> | GUSTO and BIS | -3.04 | (-3.52--2.55) | <b>3.77E-35</b> | <b>1.75E-32</b> | 0.04  | (-0.5-0.57)  | 8.87E-01        | 9.11E-01        | notSig        | -0.23 | (-0.6-0.15)   | 2.33E-01        | 2.87E-01        |
| LPC(O-24:1)       | -1.89 | (-2.69--1.08) | <b>6.47E-06</b> | <b>4.55E-05</b> | GUSTO and BIS | -2.25 | (-2.71--1.8)  | <b>3.96E-22</b> | <b>2.04E-20</b> | 1.07  | (0.61-1.54)  | <b>7.35E-06</b> | <b>3.79E-05</b> | BIS only      | 0.81  | (0.46-1.16)   | <b>5.66E-06</b> | <b>1.47E-05</b> |
| LPC(O-24:2)       | -2.24 | (-3.13--1.33) | <b>1.70E-06</b> | <b>1.43E-05</b> | GUSTO and BIS | -2.03 | (-2.53--1.53) | <b>9.99E-16</b> | <b>1.55E-14</b> | 0.15  | (-0.33-0.62) | 5.47E-01        | 6.32E-01        | notSig        | 0.17  | (-0.19-0.53)  | 3.51E-01        | 4.08E-01        |
| LPC(P-16:0)       | -0.11 | (-1.16-0.96)  | 8.40E-01        | 8.75E-01        | notSig        | 0.34  | (-0.1-0.77)   | 1.28E-01        | 1.62E-01        | 0.86  | (0.38-1.34)  | <b>4.97E-04</b> | <b>1.65E-03</b> | GUSTO and BIS | 0.99  | (0.64-1.33)   | <b>1.78E-08</b> | <b>5.55E-08</b> |
| LPC(P-18:0)       | -0.84 | (-1.88-0.22)  | 1.20E-01        | 1.83E-01        | notSig        | 0.22  | (-0.2-0.63)   | 3.14E-01        | 3.62E-01        | 0.72  | (0.2-1.24)   | <b>6.31E-03</b> | <b>1.57E-02</b> | GUSTO and BIS | 1.23  | (0.86-1.6)    | <b>5.74E-11</b> | <b>2.11E-10</b> |
| LPC(P-18:1)       | 0.22  | (-0.87-1.33)  | 6.94E-01        | 7.59E-01        | GUSTO only    | 0.79  | (0.27-1.31)   | <b>3.03E-03</b> | <b>5.26E-03</b> | 1.12  | (0.59-1.64)  | <b>3.33E-05</b> | <b>1.46E-04</b> | GUSTO and BIS | 1.17  | (0.75-1.58)   | <b>3.54E-08</b> | <b>1.08E-07</b> |
| LPC(P-20:0)       | -1.26 | (-1.97--0.56) | <b>5.13E-04</b> | <b>1.91E-03</b> | GUSTO and BIS | -0.94 | (-1.39--0.5)  | <b>3.48E-05</b> | <b>8.84E-05</b> | 0.62  | (0.18-1.06)  | <b>6.04E-03</b> | <b>1.53E-02</b> | GUSTO and BIS | 1.03  | (0.66-1.4)    | <b>4.35E-08</b> | <b>1.31E-07</b> |
| LPE(16:0) [sn2]   | 0.33  | (-0.67-1.35)  | 5.16E-01        | 5.94E-01        | GUSTO only    | -0.40 | (-0.85-0.05)  | 8.42E-02        | 1.11E-01        | 1.64  | (1.17-2.12)  | <b>2.77E-11</b> | <b>3.67E-10</b> | GUSTO and BIS | 1.85  | (1.46-2.23)   | <b>8.01E-21</b> | <b>5.55E-20</b> |
| LPE(16:0) [sn1]   | 0.24  | (-0.73-1.23)  | 6.26E-01        | 6.98E-01        | notSig        | -0.33 | (-0.77-0.1)   | 1.35E-01        | 1.70E-01        | 1.61  | (1.15-2.07)  | <b>1.20E-11</b> | <b>1.69E-10</b> | GUSTO and BIS | 1.83  | (1.46-2.2)    | <b>2.07E-22</b> | <b>1.57E-21</b> |
| LPE(18:0) [sn2]   | 0.52  | (-0.52-1.56)  | 3.27E-01        | 4.19E-01        | notSig        | 0.24  | (-0.2-0.67)   | 2.87E-01        | 3.38E-01        | 1.26  | (0.78-1.74)  | <b>2.72E-07</b> | <b>1.94E-06</b> | GUSTO and BIS | 1.32  | (0.96-1.68)   | <b>5.11E-13</b> | <b>2.30E-12</b> |
| LPE(18:0) [sn1]   | 0.74  | (-0.28-1.76)  | 1.55E-01        | 2.27E-01        | notSig        | 0.46  | (0.04-0.87)   | <b>2.99E-02</b> | <b>4.24E-02</b> | 1.21  | (0.72-1.69)  | <b>1.18E-06</b> | <b>7.21E-06</b> | GUSTO and BIS | 1.36  | (1-1.72)      | <b>1.32E-13</b> | <b>6.11E-13</b> |
| LPE(18:1) [sn2]   | -1.14 | (-2.04--0.24) | <b>1.36E-02</b> | <b>2.98E-02</b> | GUSTO and BIS | -0.88 | (-1.35--0.41) | <b>2.22E-04</b> | <b>4.84E-04</b> | 2.73  | (2.2-3.25)   | <b>5.46E-23</b> | <b>1.19E-20</b> | GUSTO and BIS | 2.66  | (2.24-3.07)   | <b>4.00E-36</b> | <b>7.14E-35</b> |
| LPE(18:1) [sn1]   | -1.23 | (-2.15--0.3)  | <b>9.49E-03</b> | <b>2.17E-02</b> | GUSTO and BIS | -0.87 | (-1.33--0.4)  | <b>2.63E-04</b> | <b>5.57E-04</b> | 2.60  | (2.07-3.13)  | <b>1.36E-20</b> | <b>1.27E-18</b> | GUSTO and BIS | 2.72  | (2.3-3.15)    | <b>1.57E-36</b> | <b>2.91E-35</b> |
| LPE(18:2) [sn2]   | -2.31 | (-3.32--1.3)  | <b>1.04E-05</b> | <b>6.59E-05</b> | GUSTO and BIS | -1.35 | (-1.9--0.79)  | <b>1.93E-06</b> | <b>6.11E-06</b> | 3.21  | (2.46-3.97)  | <b>3.01E-16</b> | <b>8.74E-15</b> | GUSTO and BIS | 3.37  | (2.78-3.97)   | <b>1.44E-28</b> | <b>1.55E-27</b> |
| LPE(18:2) [sn1]   | -2.50 | (-3.58--1.41) | <b>9.53E-06</b> | <b>6.23E-05</b> | GUSTO and BIS | -1.39 | (-1.96--0.82) | <b>1.94E-06</b> | <b>6.11E-06</b> | 3.28  | (2.49-4.06)  | <b>9.07E-16</b> | <b>2.34E-14</b> | GUSTO and BIS | 3.47  | (2.87-4.07)   | <b>3.74E-30</b> | <b>4.45E-29</b> |
| LPE(20:4) [sn1]   | 0.57  | (-0.4-1.55)   | 2.47E-01        | 3.35E-01        | notSig        | 0.57  | (0.1-1.04)    | <b>1.80E-02</b> | <b>2.65E-02</b> | 2.92  | (2.13-3.71)  | <b>8.91E-13</b> | <b>1.42E-11</b> | GUSTO and BIS | 3.04  | (2.49-3.59)   | <b>2.81E-27</b> | <b>2.90E-26</b> |
| LPE(22:6) [sn2]   | 1.32  | (0.22-2.44)   | <b>1.86E-02</b> | <b>3.84E-02</b> | BIS only      | 0.00  | (-0.52-0.52)  | 9.92E-01        | 9.94E-01        | 1.76  | (0.86-2.66)  | <b>1.31E-04</b> | <b>4.94E-04</b> | GUSTO and BIS | 1.97  | (1.4-2.54)    | <b>1.14E-11</b> | <b>4.55E-11</b> |
| LPE(22:6) [sn1]   | 0.85  | (-0.22-1.93)  | 1.21E-01        | 1.83E-01        | notSig        | -0.02 | (-0.57-0.52)  | 9.31E-01        | 9.44E-01        | 1.91  | (1.07-2.75)  | <b>8.81E-06</b> | <b>4.35E-05</b> | GUSTO and BIS | 2.16  | (1.6-2.71)    | <b>2.23E-14</b> | <b>1.10E-13</b> |
| PC(28:0)          | -4.68 | (-6.07--3.26) | <b>3.29E-10</b> | <b>1.22E-08</b> | GUSTO and BIS | -3.45 | (-4.31--2.59) | <b>3.66E-15</b> | <b>5.14E-14</b> | 0.39  | (-0.36-1.14) | 3.06E-01        | 4.09E-01        | notSig        | -0.02 | (-0.49-0.46)  | 9.45E-01        | 9.49E-01        |
| PC(14:0_16:0)     | -2.51 | (-3.49--1.53) | <b>8.07E-07</b> | <b>7.20E-06</b> | GUSTO and BIS | -2.30 | (-2.87--1.72) | <b>5.36E-15</b> | <b>7.31E-14</b> | 0.19  | (-0.59-0.98) | 6.28E-01        | 7.10E-01        | notSig        | -0.03 | (-0.54-0.49)  | 9.24E-01        | 9.36E-01        |
| PC(31:0) (a)      | -2.80 | (-3.99--1.6)  | <b>6.84E-06</b> | <b>4.67E-05</b> | GUSTO and BIS | -3.07 | (-3.86--2.27) | <b>3.15E-14</b> | <b>3.57E-13</b> | -0.64 | (-1.49-0.2)  | 1.35E-01        | 2.09E-01        | notSig        | -0.60 | (-1.21-0.02)  | 5.72E-02        | 8.27E-02        |
| PC(31:0) (b)      | -1.34 | (-2.09--0.59) | <b>5.43E-04</b> | <b>1.97E-03</b> | GUSTO and BIS | -1.89 | (-2.37--1.41) | <b>6.56E-15</b> | <b>8.63E-14</b> | -0.67 | (-1.4-0.06)  | 7.16E-02        | 1.25E-01        | notSig        | -0.80 | (-1.37--0.24) | <b>5.49E-03</b> | <b>1.01E-02</b> |
| PC(16:0_16:0)     | -0.40 | (-1.07-0.28)  | 2.51E-01        | 3.37E-01        | GUSTO only    | -0.58 | (-0.98--0.18) | <b>4.92E-03</b> | <b>8.24E-03</b> | -0.14 | (-0.9-0.62)  | 7.13E-01        | 7.84E-01        | notSig        | -0.39 | (-0.88-0.1)   | 1.18E-01        | 1.60E-01        |
| PC(32:1)          | -0.42 | (-1.51-0.68)  | 4.52E-01        | 5.34E-01        | notSig        | -0.71 | (-1.37--0.04) | <b>3.65E-02</b> | 5.10E-02        | 1.46  | (0.74-2.19)  | <b>7.35E-05</b> | <b>2.89E-04</b> | GUSTO and BIS | 1.25  | (0.7-1.8)     | <b>9.54E-06</b> | <b>2.41E-05</b> |
| PC(32:2)          | -2.17 | (-3.15--1.17) | <b>2.37E-05</b> | <b>1.33E-04</b> | GUSTO and BIS | -1.77 | (-2.33--1.22) | <b>4.02E-10</b> | <b>2.39E-09</b> | 0.62  | (-0.29-1.54) | 1.82E-01        | 2.71E-01        | notSig        | 0.27  | (-0.27-0.82)  | 3.24E-01        | 3.84E-01        |
| PC(33:0) (a)      | -0.43 | (-1.29-0.43)  | 3.28E-01        | 4.19E-01        | GUSTO only    | -1.47 | (-2.04--0.91) | <b>3.59E-07</b> | <b>1.37E-06</b> | -0.80 | (-1.6-0.01)  | 5.16E-02        | 9.67E-02        | notSig        | -0.79 | (-1.39--0.2)  | <b>9.27E-03</b> | <b>1.61E-02</b> |
| PC(33:0) (b)      | -0.60 | (-1.25-0.05)  | 6.96E-02        | 1.17E-01        | GUSTO only    | -1.28 | (-1.7--0.85)  | <b>3.92E-09</b> | <b>2.04E-08</b> | -0.88 | (-1.6--0.16) | <b>1.73E-02</b> | <b>3.74E-02</b> | GUSTO and BIS | -1.15 | (-1.67--0.63) | <b>1.49E-05</b> | <b>3.72E-05</b> |
| PC(33:1)          | -0.46 | (-1.33-0.43)  | 3.10E-01        | 4.02E-01        | GUSTO only    | -1.66 | (-2.21--1.11) | <b>3.79E-09</b> | <b>2.00E-08</b> | 0.09  | (-0.77-0.95) | 8.36E-01        | 8.82E-01        | notSig        | -0.35 | (-0.85-0.16)  | 1.78E-01        | 2.28E-01        |
| PC(33:2)          | -0.83 | (-1.53--0.12) | <b>2.21E-02</b> | <b>4.38E-02</b> | GUSTO and BIS | -1.63 | (-2.1--1.16)  | <b>9.66E-12</b> | <b>7.73E-11</b> | -0.84 | (-1.79-0.1)  | 8.06E-02        | 1.35E-01        | GUSTO only    | -1.13 | (-1.65--0.6)  | <b>2.78E-05</b> | <b>6.79E-05</b> |
| PC(16:0_18:0)     | -1.04 | (-1.6--0.48)  | <b>3.21E-04</b> | <b>1.22E-03</b> | GUSTO and BIS | -1.01 | (-1.34--0.67) | <b>3.98E-09</b> | <b>2.05E-08</b> | 0.07  | (-0.52-0.66) | 8.24E-01        | 8.75E-01        | notSig        | -0.10 | (-0.51-0.31)  | 6.35E-01        | 6.86E-01        |
| PC(16:0_18:1)     | 0.19  | (-0.19-0.57)  | 3.31E-01        | 4.21E-01        | GUSTO only    | -0.22 | (-0.54-0.09)  | 1.65E-01        | 2.05E-01        | 0.90  | (0.36-1.44)  | <b>1.07E-03</b> | <b>3.29E-03</b> | BIS only      | 0.60  | (0.17-1.03)   | <b>6.00E-03</b> | <b>1.08E-02</b> |
| PC(16:0_18:2)     | -0.04 | (-0.34-0.25)  | 7.70E-01        | 8.21E-01        | GUSTO only    | -0.19 | (-0.4-0.02)   | 8.34E-02        | 1.10E-01        | 0.20  | (-0.4-0.8)   | 5.12E-01        | 6.06E-01        | notSig        | -0.07 | (-0.56-0.42)  | 7.88E-01        | 8.30E-01        |
| PC(16:1_18:2)     | -0.45 | (-1.31-0.41)  | 2.99E-01        | 3.90E-01        | GUSTO only    | -0.72 | (-1.23--0.21) | <b>5.46E-03</b> | <b>9.06E-03</b> | 0.21  | (-0.68-1.1)  | 6.43E-01        | 7.22E-01        | notSig        | -0.42 | (-0.94-0.1)   | 1.12E-01        | 1.53E-01        |
| PC(16:0_18:3) (a) | -1.99 | (-2.94--1.04) | <b>5.17E-05</b> | <b>2.50E-04</b> | GUSTO and BIS | -1.85 | (-2.39--1.31) | <b>1.69E-11</b> | <b>1.28E-10</b> | -0.34 | (-1.4-0.72)  | 5.30E-01        | 6.18E-01        | notSig        | -0.09 | (-0.74-0.56)  | 7.81E-01        | 8.25E-01        |
| PC(14:0_20:4)     | -1.32 | (-2.33--0.29) | <b>1.21E-02</b> | <b>2.69E-02</b> | BIS only      | -0.94 | (-1.56--0.32) | <b>2.75E-03</b> | <b>4.84E-03</b> | 0.74  | (-0.04-1.53) | 6.46E-02        | 1.15E-01        | notSig        | 0.18  | (-0.3-0.66)   | 4.51E-01        | 5.05E-01        |
| PC(34:5)          | -2.45 | (-3.87--1.01) | <b>9.36E-04</b> | <b>3.00E-03</b> | BIS only      | -1.70 | (-2.61--0.79) | <b>2.50E-04</b> | <b>5.34E-04</b> | -0.53 | (-1.48-0.41) | 2.66E-01        | 3.66E-01        | GUSTO only    | -0.88 | (-1.5--0.26)  | <b>5.70E-03</b> | <b>1.03E-02</b> |
| PC(15-MHDA_18:1)  | 0.22  | (-0.59-1.04)  | 5.93E-01        | 6.67E-01        | GUSTO only    | -1.18 | (-1.75--0.62) | <b>4.51E-05</b> | <b>1.11E-04</b> | -0.73 | (-1.55-0.1)  | 8.35E-02        | 1.39E-01        | GUSTO only    | -1.01 | (-1.57--0.45) | <b>4.28E-04</b> | <b>9.24E-04</b> |
| PC(17:0_18:1)     | 0.02  | (-0.75-0.8)   | 9.58E-01        | 9.66E-01        | GUSTO only    | -1.38 | (-1.8--0.95)  | <b>2.17E-10</b> | <b>1.36E-09</b> | -0.48 | (-1.2-0.25)  | 1.96E-01        | 2.87E-01        | GUSTO only    | -0.87 | (-1.28--0.45) | <b>4.19E-05</b> | <b>1.01E-04</b> |
| PC(15-MHDA_18:2)  | 0.01  | (-0.9-0.92)   | 9.86E-01        | 9.88E-01        | GUSTO only    | -1.03 | (-1.64--0.43) | <b>8.42E-04</b> | <b>1.58E-03</b> | -1.27 | (-2.34--0.2) | <b>2.01E-02</b> | <b>4.26E-02</b> | GUSTO and BIS | -1.35 | (-1.94--0.76) | <b>6.66E-06</b> | <b>1.71E-05</b> |
| PC(17:0_18:2)     | -0.35 | (-1.19-0.49)  | 4.12E-01        | 4.96E-01        | GUSTO only    | -1.20 | (-1.65--0.74) | <b>2.56E-07</b> | <b>9.97E-07</b> | -0.94 | (-1.91-0.04) | 5.99E-02        | 1.09E-01        | GUSTO only    | -1.19 | (-1.69--0.69) | <b>2.85E-06</b> | <b>7.51E-06</b> |
| PC(17:1_18:2)     | -0.82 | (-1.51--0.14) | <b>1.89E-02</b> | <b>3.86E-02</b> | GUSTO and BIS | -1.06 | (-1.49--0.64) | <b>8.76E-07</b> | <b>2.88E-06</b> | -0.75 | (-1.59-0.08) | 7.59E-02        | 1.31E-01        | GUSTO only    | -0.73 | (-1.2--0.27)  | <b>2.08E-03</b> | <b>4.03E-03</b> |
| PC(15:0_20:3)     | -0.99 | (-1.64--0.34) | <b>3.00E-03</b> | <b>8.16E-03</b> | GUSTO and BIS | -0.63 | (-0.87--0.39) | <b>2.98E-07</b> | <b>1.14E-06</b> | -0.32 | (-1.04-0.4)  | 3.82E-01        | 4.87E-01        | notSig        | -0.22 | (-0.81-0.37)  | 4.61E-01        | 5.14E-01        |
| PC(15:0_20:4)     | 0.76  | (-0.05-1.58)  | 6.46E-02        | 1.11E-01        | GUSTO only    | -0.41 | (-0.94-0.12)  | 1.26E-01        | 1.59E-01        | -0.49 | (-1.2-0.22)  | 1.72E-01        | 2.59E-01        | GUSTO only    | -0.99 | (-1.44--0.54) |                 |                 |

|                    |       |               |                 |                 |               |       |               |                 |                 |       |               |                 |                 |               |       |               |                 |                 |
|--------------------|-------|---------------|-----------------|-----------------|---------------|-------|---------------|-----------------|-----------------|-------|---------------|-----------------|-----------------|---------------|-------|---------------|-----------------|-----------------|
| PC(16:0_20:3) (a)  | -0.46 | (-1.03-0.11)  | 1.14E-01        | 1.76E-01        | GUSTO only    | -0.83 | (-1.24--0.42) | <b>6.66E-05</b> | <b>1.59E-04</b> | 0.95  | (0.33-1.57)   | <b>2.84E-03</b> | <b>7.66E-03</b> | BIS only      | 0.36  | (-0.1-0.83)   | 1.27E-01        | 1.71E-01        |
| PC(16:0_20:3) (b)  | -1.26 | (-2.19--0.32) | <b>8.79E-03</b> | <b>2.02E-02</b> | BIS only      | -0.09 | (-0.68-0.5)   | 7.59E-01        | 7.99E-01        | 3.62  | (2.8-4.44)    | <b>2.32E-17</b> | <b>8.96E-16</b> | BIS only      | 1.59  | (1.08-2.1)    | <b>8.24E-10</b> | <b>2.85E-09</b> |
| PC(18:2_18:2)      | -2.91 | (-3.7--2.11)  | <b>3.37E-12</b> | <b>5.22E-10</b> | GUSTO and BIS | -2.72 | (-3.25--2.19) | <b>5.05E-24</b> | <b>2.93E-22</b> | 0.49  | (-0.43-1.4)   | 2.97E-01        | 3.99E-01        | notSig        | 0.43  | (-0.23-1.09)  | 2.06E-01        | 2.59E-01        |
| PC(16:1_20:4)      | 0.28  | (-0.51-1.08)  | 4.90E-01        | 5.70E-01        | notSig        | -0.12 | (-0.64-0.39)  | 6.39E-01        | 6.89E-01        | 0.98  | (0.35-1.61)   | <b>2.30E-03</b> | <b>6.52E-03</b> | BIS only      | 0.52  | (0.07-0.97)   | <b>2.38E-02</b> | <b>3.85E-02</b> |
| PC(16:0_20:5)      | 0.04  | (-1.11-1.2)   | 9.49E-01        | 9.64E-01        | notSig        | -0.10 | (-0.94-0.73)  | 8.07E-01        | 8.36E-01        | -0.81 | (-1.71-0.09)  | 7.88E-02        | 1.34E-01        | GUSTO only    | -1.35 | (-1.98--0.72) | <b>2.54E-05</b> | <b>6.23E-05</b> |
| PC(15-MHDA_20:4)   | 1.05  | (0.36-1.74)   | <b>2.70E-03</b> | <b>7.53E-03</b> | BIS only      | 0.30  | (-0.22-0.81)  | 2.60E-01        | 3.08E-01        | -1.15 | (-1.81--0.5)  | <b>5.34E-04</b> | <b>1.76E-03</b> | GUSTO and BIS | -1.38 | (-1.85--0.91) | <b>9.74E-09</b> | <b>3.05E-08</b> |
| PC(17:0_20:4)      | 1.30  | (0.57-2.04)   | <b>5.05E-04</b> | <b>1.89E-03</b> | BIS only      | 0.38  | (-0.1-0.86)   | 1.25E-01        | 1.59E-01        | -1.35 | (-1.9--0.8)   | <b>1.68E-06</b> | <b>9.75E-06</b> | GUSTO and BIS | -1.54 | (-1.92--1.17) | <b>6.96E-16</b> | <b>3.71E-15</b> |
| PC(15:0_22:6)      | -0.74 | (-1.59-0.12)  | 9.04E-02        | 1.46E-01        | GUSTO only    | -1.86 | (-2.41--1.3)  | <b>6.72E-11</b> | <b>4.65E-10</b> | -1.40 | (-2.16--0.63) | <b>3.66E-04</b> | <b>1.26E-03</b> | GUSTO and BIS | -1.71 | (-2.17--1.24) | <b>5.20E-13</b> | <b>2.32E-12</b> |
| PC(38:2)           | -1.40 | (-1.99--0.81) | <b>4.63E-06</b> | <b>3.52E-05</b> | GUSTO and BIS | -1.23 | (-1.59--0.87) | <b>2.15E-11</b> | <b>1.58E-10</b> | 1.28  | (0.78-1.78)   | <b>5.73E-07</b> | <b>3.75E-06</b> | GUSTO and BIS | 1.14  | (0.75-1.52)   | <b>8.45E-09</b> | <b>2.69E-08</b> |
| PC(18:0_20:3)      | -0.59 | (-1.34-0.17)  | 1.26E-01        | 1.89E-01        | GUSTO only    | 0.39  | (-0.12-0.9)   | 1.37E-01        | 1.73E-01        | 0.56  | (0.08-1.05)   | <b>2.18E-02</b> | <b>4.56E-02</b> | BIS only      | 0.38  | (0.01-0.75)   | <b>4.33E-02</b> | 6.53E-02        |
| PC(18:1_20:3)      | -0.77 | (-1.5--0.04)  | <b>3.98E-02</b> | 7.21E-02        | notSig        | -0.66 | (-1.13--0.19) | <b>5.77E-03</b> | <b>9.49E-03</b> | 1.35  | (0.71-2)      | <b>4.08E-05</b> | <b>1.72E-04</b> | BIS only      | 0.78  | (0.33-1.23)   | <b>6.66E-04</b> | <b>1.40E-03</b> |
| PC(38:4) (b)       | -1.31 | (-2.05--0.56) | <b>6.54E-04</b> | <b>2.25E-03</b> | GUSTO and BIS | -1.13 | (-1.63--0.62) | <b>1.26E-05</b> | <b>3.52E-05</b> | 0.55  | (0.05-1.06)   | <b>3.07E-02</b> | 6.14E-02        | notSig        | 0.35  | (-0.07-0.77)  | 1.02E-01        | 1.40E-01        |
| PC(18:0_20:4)      | 1.26  | (0.63-1.91)   | <b>1.01E-04</b> | <b>4.47E-04</b> | GUSTO and BIS | 1.12  | (0.67-1.57)   | <b>1.02E-06</b> | <b>3.25E-06</b> | -0.34 | (-0.8-0.12)   | 1.49E-01        | 2.28E-01        | GUSTO only    | -0.61 | (-0.98--0.25) | <b>9.84E-04</b> | <b>2.02E-03</b> |
| PC(38:5) (a)       | 0.26  | (-0.28-0.8)   | 3.46E-01        | 4.35E-01        | GUSTO only    | -0.47 | (-0.83--0.1)  | <b>1.34E-02</b> | <b>2.04E-02</b> | -0.03 | (-0.53-0.47)  | 9.05E-01        | 9.27E-01        | GUSTO only    | -0.58 | (-0.94--0.21) | <b>1.76E-03</b> | <b>3.41E-03</b> |
| PC(38:5) (b)       | -0.57 | (-1.24-0.1)   | 9.65E-02        | 1.53E-01        | GUSTO only    | -0.88 | (-1.37--0.39) | <b>4.74E-04</b> | <b>9.37E-04</b> | 0.88  | (0.33-1.44)   | <b>1.68E-03</b> | <b>4.95E-03</b> | BIS only      | 0.58  | (0.15-1.01)   | <b>7.95E-03</b> | <b>1.39E-02</b> |
| PC(38:6) (a)       | -0.86 | (-1.53--0.19) | <b>1.19E-02</b> | <b>2.67E-02</b> | GUSTO and BIS | -0.95 | (-1.39--0.5)  | <b>3.04E-05</b> | <b>7.90E-05</b> | 0.44  | (-0.31-1.19)  | 2.48E-01        | 3.49E-01        | notSig        | 0.23  | (-0.3-0.75)   | 3.93E-01        | 4.51E-01        |
| PC(16:0_22:6)      | 0.05  | (-0.47-0.59)  | 8.42E-01        | 8.75E-01        | GUSTO only    | -0.38 | (-0.79-0.02)  | 6.43E-02        | 8.68E-02        | -0.50 | (-0.95--0.04) | <b>3.14E-02</b> | 6.25E-02        | GUSTO only    | -0.71 | (-1.09--0.33) | <b>2.65E-04</b> | <b>5.90E-04</b> |
| PC(18:2_20:5)      | -1.97 | (-3.01--0.91) | <b>2.88E-04</b> | <b>1.11E-03</b> | GUSTO and BIS | -1.86 | (-2.57--1.14) | <b>3.62E-07</b> | <b>1.37E-06</b> | 0.23  | (-0.63-1.08)  | 6.01E-01        | 6.83E-01        | notSig        | -0.23 | (-0.82-0.36)  | 4.48E-01        | 5.03E-01        |
| PC(16:1_22:6)      | -0.18 | (-0.96-0.61)  | 6.57E-01        | 7.22E-01        | GUSTO only    | -1.01 | (-1.52--0.49) | <b>1.26E-04</b> | <b>2.90E-04</b> | -0.19 | (-0.8-0.41)   | 5.28E-01        | 6.17E-01        | GUSTO only    | -0.66 | (-1.07--0.26) | <b>1.33E-03</b> | <b>2.63E-03</b> |
| PC(38:7)(c)        | 0.06  | (-0.68-0.81)  | 8.75E-01        | 9.01E-01        | GUSTO only    | -0.95 | (-1.41--0.49) | <b>5.83E-05</b> | <b>1.40E-04</b> | -0.34 | (-0.94-0.26)  | 2.62E-01        | 3.63E-01        | GUSTO only    | -0.66 | (-1.04--0.27) | <b>7.68E-04</b> | <b>1.58E-03</b> |
| PC(39:5)(a)        | -0.60 | (-1.43-0.24)  | 1.62E-01        | 2.36E-01        | GUSTO only    | -1.57 | (-2.16--0.99) | <b>1.49E-07</b> | <b>6.13E-07</b> | -1.86 | (-2.59--1.13) | <b>8.03E-07</b> | <b>5.01E-06</b> | GUSTO and BIS | -1.93 | (-2.42--1.43) | <b>2.05E-14</b> | <b>1.02E-13</b> |
| PC(39:5)(b)        | -0.42 | (-1.1-0.27)   | 2.33E-01        | 3.19E-01        | GUSTO only    | -1.30 | (-1.8--0.8)   | <b>3.85E-07</b> | <b>1.42E-06</b> | -1.07 | (-1.72--0.43) | <b>1.03E-03</b> | <b>3.18E-03</b> | GUSTO and BIS | -1.52 | (-1.97--1.07) | <b>3.30E-11</b> | <b>1.24E-10</b> |
| PC(15-MHDA_22:6)   | 0.12  | (-0.79-1.04)  | 7.99E-01        | 8.45E-01        | GUSTO only    | -1.36 | (-1.97--0.76) | <b>1.06E-05</b> | <b>2.99E-05</b> | -2.37 | (-3.11--1.64) | <b>3.98E-10</b> | <b>4.44E-09</b> | GUSTO and BIS | -2.21 | (-2.71--1.71) | <b>4.68E-18</b> | <b>2.72E-17</b> |
| PC(17:0_22:6)      | -0.17 | (-0.99-0.65)  | 6.75E-01        | 7.41E-01        | GUSTO only    | -1.18 | (-1.73--0.63) | <b>2.49E-05</b> | <b>6.69E-05</b> | -1.94 | (-2.61--1.27) | <b>1.81E-08</b> | <b>1.50E-07</b> | GUSTO and BIS | -2.12 | (-2.55--1.68) | <b>6.87E-22</b> | <b>5.14E-21</b> |
| PC(18:0_22:5) (n6) | -1.13 | (-2.15--0.11) | <b>3.01E-02</b> | 5.80E-02        | GUSTO only    | -1.25 | (-1.86--0.65) | <b>4.66E-05</b> | <b>1.14E-04</b> | 1.74  | (1.01-2.47)   | <b>3.76E-06</b> | <b>2.05E-05</b> | BIS only      | 0.94  | (0.31-1.57)   | <b>3.28E-03</b> | <b>6.18E-03</b> |
| PC(18:0_22:6)      | -0.20 | (-0.92-0.52)  | 5.77E-01        | 6.54E-01        | notSig        | -0.41 | (-0.92-0.09)  | 1.11E-01        | 1.42E-01        | -0.82 | (-1.39--0.25) | <b>4.70E-03</b> | <b>1.23E-02</b> | GUSTO and BIS | -1.08 | (-1.51--0.64) | <b>1.23E-06</b> | <b>3.32E-06</b> |
| PC(40:7) (a)       | -1.26 | (-2.07--0.45) | <b>2.30E-03</b> | <b>6.51E-03</b> | GUSTO and BIS | -1.33 | (-1.82--0.83) | <b>1.57E-07</b> | <b>6.30E-07</b> | 1.75  | (1.08-2.42)   | <b>3.58E-07</b> | <b>2.44E-06</b> | BIS only      | 1.49  | (0.94-2.05)   | <b>1.16E-07</b> | <b>3.41E-07</b> |
| PC(18:1_22:6) (a)  | -0.62 | (-1.26-0.03)  | 6.33E-02        | 1.10E-01        | GUSTO only    | -1.25 | (-1.67--0.84) | <b>3.36E-09</b> | <b>1.79E-08</b> | -0.08 | (-0.58-0.42)  | 7.45E-01        | 8.07E-01        | notSig        | -0.21 | (-0.61-0.2)   | 3.18E-01        | 3.77E-01        |
| PC(40:8)           | -1.39 | (-2.06--0.72) | <b>5.91E-05</b> | <b>2.77E-04</b> | GUSTO and BIS | -1.62 | (-2.04--1.2)  | <b>2.37E-14</b> | <b>2.82E-13</b> | 1.18  | (0.54-1.83)   | <b>3.61E-04</b> | <b>1.25E-03</b> | GUSTO and BIS | 1.01  | (0.55-1.47)   | <b>1.69E-05</b> | <b>4.19E-05</b> |
| PC(44:12)          | -1.58 | (-2.86--0.27) | <b>1.81E-02</b> | <b>3.76E-02</b> | GUSTO and BIS | -2.07 | (-2.89--1.25) | <b>6.67E-07</b> | <b>2.26E-06</b> | -0.84 | (-1.54--0.14) | <b>1.90E-02</b> | <b>4.07E-02</b> | GUSTO and BIS | -0.92 | (-1.44--0.4)  | <b>4.94E-04</b> | <b>1.06E-03</b> |
| PC(O-16:0/16:0)    | -1.28 | (-1.95--0.61) | <b>2.19E-04</b> | <b>8.67E-04</b> | GUSTO and BIS | -0.93 | (-1.29--0.57) | <b>5.07E-07</b> | <b>1.80E-06</b> | 0.75  | (0.05-1.44)   | <b>3.63E-02</b> | 7.11E-02        | notSig        | 0.59  | (0.11-1.07)   | <b>1.58E-02</b> | <b>2.64E-02</b> |
| PC(O-32:1)         | -1.65 | (-2.49--0.8)  | <b>1.47E-04</b> | <b>6.07E-04</b> | GUSTO and BIS | -1.20 | (-1.66--0.74) | <b>3.71E-07</b> | <b>1.39E-06</b> | 0.48  | (-0.17-1.14)  | 1.49E-01        | 2.29E-01        | notSig        | 0.59  | (0.09-1.09)   | <b>2.01E-02</b> | <b>3.30E-02</b> |
| PC(O-34:1)         | -1.01 | (-1.65--0.37) | <b>1.99E-03</b> | <b>5.76E-03</b> | GUSTO and BIS | -0.89 | (-1.25--0.54) | <b>9.38E-07</b> | <b>3.06E-06</b> | 1.00  | (0.26-1.73)   | <b>7.80E-03</b> | <b>1.90E-02</b> | BIS only      | 0.83  | (0.33-1.33)   | <b>1.13E-03</b> | <b>2.27E-03</b> |
| PC(O-34:2)         | -2.65 | (-3.43--1.86) | <b>1.09E-10</b> | <b>5.76E-09</b> | GUSTO and BIS | -2.25 | (-2.73--1.77) | <b>3.67E-20</b> | <b>1.22E-18</b> | -0.02 | (-0.77-0.73)  | 9.57E-01        | 9.63E-01        | notSig        | -0.04 | (-0.57-0.48)  | 8.71E-01        | 8.97E-01        |
| PC(O-34:4)         | -1.10 | (-1.88--0.31) | <b>6.50E-03</b> | <b>1.58E-02</b> | BIS only      | -1.01 | (-1.62--0.4)  | <b>1.19E-03</b> | <b>2.18E-03</b> | 0.08  | (-0.67-0.84)  | 8.29E-01        | 8.78E-01        | notSig        | 0.03  | (-0.49-0.55)  | 9.05E-01        | 9.25E-01        |
| PC(O-35:4)         | -0.77 | (-1.6-0.07)   | 7.30E-02        | 1.21E-01        | notSig        | -0.83 | (-1.42--0.23) | <b>6.46E-03</b> | <b>1.05E-02</b> | -0.21 | (-0.87-0.44)  | 5.24E-01        | 6.16E-01        | notSig        | -0.35 | (-0.82-0.11)  | 1.37E-01        | 1.82E-01        |
| PC(O-36:0)         | -2.06 | (-2.7--1.41)  | <b>9.59E-10</b> | <b>2.34E-08</b> | GUSTO and BIS | -1.58 | (-1.97--1.19) | <b>3.04E-15</b> | <b>4.41E-14</b> | 0.34  | (-0.29-0.98)  | 2.88E-01        | 3.89E-01        | notSig        | 0.27  | (-0.24-0.78)  | 3.00E-01        | 3.59E-01        |
| PC(O-18:0/18:1)    | -2.11 | (-2.85--1.36) | <b>4.47E-08</b> | <b>6.48E-07</b> | GUSTO and BIS | -1.68 | (-2.08--1.28) | <b>1.52E-16</b> | <b>2.94E-15</b> | 1.03  | (0.38-1.67)   | <b>1.87E-03</b> | <b>5.46E-03</b> | GUSTO and BIS | 1.16  | (0.68-1.63)   | <b>2.26E-06</b> | <b>6.02E-06</b> |
| PC(O-18:1/18:1)    | -1.68 | (-2.58--0.77) | <b>3.04E-04</b> | <b>1.16E-03</b> | GUSTO and BIS | -1.30 | (-1.71--0.89) | <b>4.60E-10</b> | <b>2.70E-09</b> | 1.46  | (0.46-2.45)   | <b>4.13E-03</b> | <b>1.09E-02</b> | GUSTO and BIS | 0.92  | (0.39-1.45)   | <b>6.12E-04</b> | <b>1.30E-03</b> |
| PC(O-18:0/18:2)    | -3.85 | (-4.96--2.73) | <b>5.08E-11</b> | <b>3.37E-09</b> | GUSTO and BIS | -2.66 | (-3.17--2.16) | <b>5.23E-25</b> | <b>3.47E-23</b> | 0.44  | (-0.59-1.47)  | 4.01E-01        | 5.07E-01        | notSig        | 0.44  | (-0.1-0.99)   | 1.12E-01        | 1.53E-01        |
| PC(O-18:1/18:2)    | -1.90 | (-2.61--1.19) | <b>2.28E-07</b> | <b>2.75E-06</b> | GUSTO and BIS | -1.60 | (-2.03--1.16) | <b>6.19E-13</b> | <b>5.74E-12</b> | 0.47  | (-0.24-1.17)  | 1.96E-01        | 2.87E-01        | notSig        | 0.19  | (-0.3-0.67)   | 4.49E-01        | 5.03E-01        |
| PC(O-16:0/20:3)    | -1.54 | (-2.15--0.92) | <b>1.44E-06</b> | <b>1.24E-05</b> | BIS only      | -0.94 | (-1.34--0.54) | <b>4.09E-06</b> | <b>1.23E-05</b> | 0.89  | (0.31-1.47)   | <b>2.49E-03</b> | <b>6.88E-03</b> | BIS only      | 0.69  | (0.24-1.14)   | <b>2.42E-03</b> | <b>4.60E-03</b> |
| PC(O-16:0/20:4)    | -0.16 | (-0.81-0.5)   | 6.34E-01        | 7.04E-01        | notSig        | -0.15 | (-0.57-0.26)  | 4.62E-01        | 5.19E-01        | 0.73  | (0.04-1.42)   | <b>3.74E-02</b> | 7.25E-02        | notSig        | 0.23  | (-0.23-0.68)  | 3.28E-01        | 3.87E-01        |
| PC(O-36:5)         | -1.22 | (-2.18--0.26) | <b>1.31E-02</b> | <b>2.89E-02</b> | GUSTO and BIS | -1.17 | (-1.86--0.48) | <b>8.81E-04</b> | <b>1.65E-03</b> | -0.32 | (-1.06-0.43)  | 4.03E-01        | 5.07E-01        | GUSTO only    | -0.71 | (-1.22--0.21) | <b>5.66E-03</b> | <b>1.03E-02</b> |
| PC(O-18:0/20:4)    | -1.23 | (-1.95--0.51) | <b>8.74E-04</b> | <b>2.86E-03</b> | BIS only      | -0.68 | (-1.1--0.26)  | <b>1.41E-03</b> | <b>2.55E-03</b> | 0.20  | (-0.4-0.8)    | 5.12E-01        | 6.06E-01        | notSig        | -0.08 | (-0.48-0.33)  | 7.13E-01        | 7.58E-01        |
| PC(O-38:5)         | 0.23  | (-0.31-0.77)  | 4.13E-01        | 4.97E-01        | notSig        | 0.09  | (-0.26-0.45)  | 6.06E-01        | 6.60E-01        | 0.70  | (0.09-1.32)   | <b>2.50E-02</b> | 5.11E-02        | notSig        | 0.32  | (-0.14-0.78)  | 1.71E-01        | 2.21E-01        |
| PC(O-16:0/22:6)    | -0.65 | (-1.35-0.05)  | 6.81E-02        | 1.15E-01        | notSig        | -0.44 | (-0.93-0.05)  | 7.84E-02        | 1.04E-01        | -0.15 | (-0.74-0.44)  | 6.22E-01        | 7.06E-01        | GUSTO only    | -0.46 | (-0.89--0.04) | <b>3.33E-02</b> | 5.22E-02        |
| PC(O-40:5)         | -0.68 | (-1.28--0.06) | <b>3.03E-02</b> | 5.81E-02        | GUSTO only    | -0.75 | (-1.14--0.37) | <b>1.31E-04</b> | <b>3.00E-04</b> | 0.36  | (-0.24-0.95)  | 2.38E-01        | 3.39E-01        | notSig        | 0.07  | (-0.32-0.47)  | 7.16E-01        | 7.60E-01        |
| PC(O-18:0/22:6)    | -1.39 | (-2.1--0.66)  | <b>1.87E-04</b> | <b>7.56E-04</b> | GUSTO and BIS | -0.95 | (-1.4--0.51)  | <b>2.61E-05</b> | <b>6.91E-05</b> |       |               |                 |                 |               |       |               |                 |                 |

|                     |       |               |                 |                 |               |       |               |                 |                 |       |               |                 |                 |               |       |               |                 |                 |
|---------------------|-------|---------------|-----------------|-----------------|---------------|-------|---------------|-----------------|-----------------|-------|---------------|-----------------|-----------------|---------------|-------|---------------|-----------------|-----------------|
| PC(P-16:0/16:1)     | -0.98 | (-1.64--0.32) | <b>3.77E-03</b> | <b>1.01E-02</b> | GUSTO and BIS | -0.83 | (-1.28--0.39) | <b>2.26E-04</b> | <b>4.90E-04</b> | 0.87  | (0.13-1.61)   | <b>2.21E-02</b> | <b>4.59E-02</b> | BIS only      | 0.39  | (-0.12-0.9)   | 1.34E-01        | 1.80E-01        |
| PC(P-16:0/18:0)     | -2.11 | (-3.14--1.07) | <b>8.57E-05</b> | <b>3.90E-04</b> | GUSTO and BIS | -1.32 | (-1.68--0.95) | <b>2.10E-12</b> | <b>1.84E-11</b> | -0.19 | (-1.26-0.88)  | 7.28E-01        | 7.97E-01        | notSig        | -0.23 | (-0.71-0.26)  | 3.60E-01        | 4.16E-01        |
| PC(P-16:0/18:1)     | -1.46 | (-2.14--0.77) | <b>3.88E-05</b> | <b>2.02E-04</b> | GUSTO and BIS | -1.31 | (-1.73--0.88) | <b>1.61E-09</b> | <b>8.77E-09</b> | 0.43  | (-0.26-1.12)  | 2.24E-01        | 3.23E-01        | notSig        | 0.03  | (-0.43-0.48)  | 9.09E-01        | 9.25E-01        |
| PC(P-16:0/18:2)     | -1.90 | (-2.69--1.11) | <b>3.14E-06</b> | <b>2.48E-05</b> | GUSTO and BIS | -1.38 | (-1.86--0.91) | <b>8.71E-09</b> | <b>4.17E-08</b> | -0.93 | (-1.87-0.02)  | 5.42E-02        | 1.00E-01        | GUSTO only    | -1.19 | (-1.71--0.67) | <b>7.54E-06</b> | <b>1.92E-05</b> |
| PC(P-16:0/18:3)     | -3.16 | (-4.1--2.22)  | <b>1.35E-10</b> | <b>5.76E-09</b> | GUSTO and BIS | -2.12 | (-2.64--1.59) | <b>2.34E-15</b> | <b>3.50E-14</b> | -0.88 | (-1.69--0.06) | <b>3.51E-02</b> | 6.90E-02        | notSig        | -0.60 | (-1.05--0.15) | <b>9.39E-03</b> | <b>1.62E-02</b> |
| PC(P-35:2)(a)       | -2.69 | (-3.8--1.57)  | <b>3.32E-06</b> | <b>2.57E-05</b> | GUSTO and BIS | -2.43 | (-3.11--1.74) | <b>4.02E-12</b> | <b>3.39E-11</b> | -1.45 | (-2.56--0.33) | <b>1.10E-02</b> | <b>2.53E-02</b> | BIS only      | -0.73 | (-1.33--0.14) | <b>1.56E-02</b> | <b>2.61E-02</b> |
| PC(P-35:2)(b)       | -2.44 | (-3.55--1.32) | <b>2.37E-05</b> | <b>1.33E-04</b> | GUSTO and BIS | -2.01 | (-2.62--1.4)  | <b>8.01E-11</b> | <b>5.39E-10</b> | -1.49 | (-2.74--0.24) | <b>1.94E-02</b> | <b>4.12E-02</b> | GUSTO and BIS | -1.46 | (-2.03--0.89) | <b>4.47E-07</b> | <b>1.25E-06</b> |
| PC(P-15:0/20:4) (b) | -1.21 | (-2.04--0.37) | <b>4.84E-03</b> | <b>1.24E-02</b> | BIS only      | -0.88 | (-1.41--0.35) | <b>1.03E-03</b> | <b>1.91E-03</b> | -0.56 | (-1.09--0.02) | <b>4.06E-02</b> | 7.82E-02        | notSig        | -0.63 | (-1.06--0.2)  | <b>4.46E-03</b> | <b>8.28E-03</b> |
| PC(P-18:1/18:1)     | -1.46 | (-2.15--0.76) | <b>4.81E-05</b> | <b>2.39E-04</b> | GUSTO and BIS | -1.29 | (-1.71--0.88) | <b>1.12E-09</b> | <b>6.25E-09</b> | 2.18  | (1.51-2.84)   | <b>2.66E-10</b> | <b>3.09E-09</b> | GUSTO and BIS | 1.82  | (1.29-2.35)   | <b>1.46E-11</b> | <b>5.76E-11</b> |
| PC(P-18:0/18:2)     | -2.51 | (-3.46--1.55) | <b>4.05E-07</b> | <b>4.18E-06</b> | GUSTO and BIS | -2.09 | (-2.58--1.6)  | <b>1.04E-16</b> | <b>2.19E-15</b> | -0.52 | (-1.46-0.42)  | 2.82E-01        | 3.84E-01        | notSig        | -0.61 | (-1.09--0.13) | <b>1.23E-02</b> | <b>2.08E-02</b> |
| PC(P-16:0/20:4)     | 0.51  | (-0.25-1.29)  | 1.89E-01        | 2.68E-01        | notSig        | 0.47  | (-0.02-0.95)  | 5.81E-02        | 7.93E-02        | 0.06  | (-0.7-0.82)   | 8.76E-01        | 9.06E-01        | GUSTO only    | -0.68 | (-1.14--0.22) | <b>3.87E-03</b> | <b>7.23E-03</b> |
| PC(P-16:0/20:5)     | -0.88 | (-1.95-0.2)   | 1.10E-01        | 1.71E-01        | notSig        | -0.69 | (-1.44-0.05)  | 6.92E-02        | 9.26E-02        | -1.12 | (-1.92--0.33) | <b>5.76E-03</b> | <b>1.48E-02</b> | GUSTO and BIS | -1.58 | (-2.11--1.04) | <b>6.68E-09</b> | <b>2.18E-08</b> |
| PC(P-17:0/20:4) (a) | -0.26 | (-1.01-0.49)  | 4.97E-01        | 5.75E-01        | GUSTO only    | -0.62 | (-1.16--0.07) | <b>2.67E-02</b> | <b>3.81E-02</b> | -1.26 | (-1.93--0.6)  | <b>2.25E-04</b> | <b>8.10E-04</b> | GUSTO and BIS | -1.41 | (-1.89--0.94) | <b>6.15E-09</b> | <b>2.02E-08</b> |
| PC(P-17:0/20:4) (b) | 0.04  | (-0.72-0.8)   | 9.25E-01        | 9.45E-01        | notSig        | -0.15 | (-0.67-0.38)  | 5.86E-01        | 6.42E-01        | -1.05 | (-1.65--0.45) | <b>6.31E-04</b> | <b>2.05E-03</b> | GUSTO and BIS | -1.47 | (-1.89--1.04) | <b>1.23E-11</b> | <b>4.90E-11</b> |
| PC(P-18:0/20:4)     | 0.11  | (-0.73-0.95)  | 8.04E-01        | 8.48E-01        | notSig        | -0.03 | (-0.51-0.45)  | 9.16E-01        | 9.31E-01        | -0.30 | (-1.02-0.41)  | 4.05E-01        | 5.07E-01        | GUSTO only    | -0.82 | (-1.24--0.4)  | <b>1.43E-04</b> | <b>3.24E-04</b> |
| PC(P-38:5) (a)      | 0.80  | (0.21-1.39)   | <b>7.78E-03</b> | <b>1.82E-02</b> | BIS only      | 0.53  | (0.1-0.95)    | <b>1.44E-02</b> | <b>2.17E-02</b> | -0.16 | (-0.83-0.51)  | 6.43E-01        | 7.22E-01        | GUSTO only    | -0.78 | (-1.21--0.35) | <b>4.00E-04</b> | <b>8.68E-04</b> |
| PC(P-38:5) (b)      | -0.54 | (-1.26-0.19)  | 1.44E-01        | 2.14E-01        | GUSTO only    | -0.73 | (-1.18--0.27) | <b>1.65E-03</b> | <b>2.97E-03</b> | 0.41  | (-0.26-1.09)  | 2.28E-01        | 3.26E-01        | GUSTO only    | -0.26 | (-0.72-0.21)  | 2.83E-01        | 3.40E-01        |
| PC(P-16:0/22:6)     | -0.38 | (-1.13-0.37)  | 3.15E-01        | 4.05E-01        | notSig        | -0.34 | (-0.85-0.18)  | 2.03E-01        | 2.47E-01        | -0.67 | (-1.36-0.01)  | 5.32E-02        | 9.87E-02        | GUSTO only    | -1.16 | (-1.61--0.71) | <b>3.72E-07</b> | <b>1.05E-06</b> |
| PC(P-20:0/20:4)     | -0.55 | (-1.24-0.14)  | 1.21E-01        | 1.83E-01        | notSig        | -0.48 | (-0.94--0.03) | <b>3.68E-02</b> | 5.12E-02        | -0.27 | (-0.8-0.26)   | 3.21E-01        | 4.25E-01        | GUSTO only    | -0.52 | (-0.92--0.12) | <b>1.01E-02</b> | <b>1.73E-02</b> |
| PC(P-18:0/22:6)     | -0.76 | (-1.56-0.05)  | 6.57E-02        | 1.13E-01        | notSig        | -0.72 | (-1.24--0.19) | <b>7.23E-03</b> | <b>1.16E-02</b> | -0.91 | (-1.57--0.25) | <b>7.08E-03</b> | <b>1.75E-02</b> | GUSTO and BIS | -1.31 | (-1.72--0.9)  | <b>4.85E-10</b> | <b>1.70E-09</b> |
| PE(16:0_16:1)       | -0.24 | (-1.79-1.33)  | 7.62E-01        | 8.15E-01        | notSig        | -0.43 | (-1.36-0.5)   | 3.61E-01        | 4.13E-01        | 1.33  | (0.29-2.38)   | <b>1.21E-02</b> | <b>2.75E-02</b> | BIS only      | 0.90  | (0.15-1.65)   | <b>1.81E-02</b> | <b>3.01E-02</b> |
| PE(16:0_18:1)       | 0.82  | (-0.18-1.83)  | 1.10E-01        | 1.71E-01        | notSig        | 0.24  | (-0.37-0.85)  | 4.47E-01        | 5.06E-01        | -0.11 | (-1.32-1.11)  | 8.64E-01        | 8.98E-01        | notSig        | -0.47 | (-1.09-0.15)  | 1.34E-01        | 1.80E-01        |
| PE(16:0_18:2)       | -0.39 | (-1.39-0.63)  | 4.52E-01        | 5.34E-01        | notSig        | -0.35 | (-1-0.31)     | 3.00E-01        | 3.49E-01        | -0.37 | (-1.48-0.75)  | 5.16E-01        | 6.08E-01        | notSig        | -0.58 | (-1.2-0.04)   | 6.61E-02        | 9.35E-02        |
| PE(16:1_18:2)       | -1.14 | (-2.49-0.23)  | 1.01E-01        | 1.60E-01        | notSig        | -1.02 | (-1.83--0.2)  | <b>1.44E-02</b> | <b>2.17E-02</b> | 0.69  | (-0.43-1.8)   | 2.27E-01        | 3.26E-01        | notSig        | 0.49  | (-0.17-1.14)  | 1.47E-01        | 1.93E-01        |
| PE(16:0_18:3) (a)   | -1.97 | (-3.3--0.62)  | <b>4.51E-03</b> | <b>1.18E-02</b> | GUSTO and BIS | -1.73 | (-2.49--0.97) | <b>8.28E-06</b> | <b>2.36E-05</b> | -0.48 | (-2.12-1.15)  | 5.62E-01        | 6.44E-01        | notSig        | -0.04 | (-0.77-0.68)  | 9.09E-01        | 9.25E-01        |
| PE(16:0_18:3) (b)   | -1.64 | (-2.88--0.38) | <b>1.09E-02</b> | <b>2.46E-02</b> | BIS only      | -0.84 | (-1.58--0.11) | <b>2.48E-02</b> | <b>3.55E-02</b> | 0.89  | (-0.09-1.88)  | 7.61E-02        | 1.31E-01        | notSig        | 0.71  | (0.04-1.38)   | <b>3.70E-02</b> | 5.70E-02        |
| PE(17:0_18:2)       | -0.60 | (-1.55-0.36)  | 2.21E-01        | 3.05E-01        | GUSTO only    | -1.00 | (-1.56--0.44) | <b>4.62E-04</b> | <b>9.20E-04</b> | -1.70 | (-2.81--0.59) | <b>2.73E-03</b> | <b>7.50E-03</b> | GUSTO and BIS | -1.00 | (-1.47--0.53) | <b>3.16E-05</b> | <b>7.67E-05</b> |
| PE(18:0_18:1)       | -0.39 | (-1.31-0.54)  | 4.15E-01        | 4.98E-01        | notSig        | 0.16  | (-0.37-0.69)  | 5.45E-01        | 6.05E-01        | -0.34 | (-1.5-0.82)   | 5.68E-01        | 6.49E-01        | notSig        | -0.17 | (-0.84-0.49)  | 6.09E-01        | 6.64E-01        |
| PE(18:1_18:1)       | -1.29 | (-2.36--0.21) | <b>1.93E-02</b> | <b>3.93E-02</b> | BIS only      | -0.64 | (-1.21--0.08) | <b>2.56E-02</b> | <b>3.65E-02</b> | 0.12  | (-1.16-1.4)   | 8.50E-01        | 8.91E-01        | notSig        | 0.05  | (-0.79-0.89)  | 9.14E-01        | 9.28E-01        |
| PE(18:0_18:2)       | -0.42 | (-1.4-0.57)   | 4.00E-01        | 4.86E-01        | notSig        | 0.18  | (-0.4-0.76)   | 5.42E-01        | 6.03E-01        | -0.59 | (-1.8-0.61)   | 3.33E-01        | 4.37E-01        | notSig        | -0.52 | (-1.13-0.08)  | 8.79E-02        | 1.22E-01        |
| PE(18:1_18:2)       | -1.76 | (-2.8--0.71)  | <b>1.07E-03</b> | <b>3.34E-03</b> | BIS only      | -1.15 | (-1.79--0.5)  | <b>4.64E-04</b> | <b>9.20E-04</b> | -0.12 | (-1.4-1.16)   | 8.56E-01        | 8.94E-01        | notSig        | -0.22 | (-0.89-0.45)  | 5.24E-01        | 5.78E-01        |
| PE(16:0_20:3)       | -0.96 | (-1.91--0.01) | <b>4.88E-02</b> | 8.70E-02        | notSig        | -0.63 | (-1.26-0)     | <b>4.96E-02</b> | 6.81E-02        | -0.15 | (-1.12-0.82)  | 7.60E-01        | 8.20E-01        | notSig        | -0.25 | (-0.85-0.36)  | 4.25E-01        | 4.81E-01        |
| PE(16:0_20:4)       | 1.51  | (0.59-2.43)   | <b>1.21E-03</b> | <b>3.75E-03</b> | BIS only      | 1.05  | (0.47-1.63)   | <b>3.62E-04</b> | <b>7.47E-04</b> | -0.10 | (-0.8-0.59)   | 7.69E-01        | 8.28E-01        | notSig        | -0.23 | (-0.7-0.24)   | 3.43E-01        | 4.02E-01        |
| PE(16:1_20:4)       | 0.65  | (-0.52-1.84)  | 2.76E-01        | 3.68E-01        | notSig        | 0.13  | (-0.59-0.84)  | 7.26E-01        | 7.70E-01        | 1.17  | (0.38-1.96)   | <b>3.87E-03</b> | <b>1.03E-02</b> | BIS only      | 0.97  | (0.39-1.54)   | <b>1.09E-03</b> | <b>2.20E-03</b> |
| PE(16:0_20:5)       | -0.58 | (-1.88-0.74)  | 3.86E-01        | 4.74E-01        | notSig        | -0.51 | (-1.33-0.3)   | 2.19E-01        | 2.65E-01        | -0.96 | (-1.95-0.04)  | 5.87E-02        | 1.07E-01        | notSig        | -0.87 | (-1.5--0.25)  | <b>5.70E-03</b> | <b>1.03E-02</b> |
| PE(17:0_20:4)       | 1.72  | (0.9-2.55)    | <b>3.79E-05</b> | <b>2.00E-04</b> | BIS only      | 0.67  | (0.15-1.19)   | <b>1.14E-02</b> | <b>1.75E-02</b> | -1.43 | (-2.16--0.7)  | <b>1.25E-04</b> | <b>4.81E-04</b> | GUSTO and BIS | -1.59 | (-2.06--1.12) | <b>2.71E-11</b> | <b>1.04E-10</b> |
| PE(18:0_20:3) (a)   | 0.32  | (-0.67-1.31)  | 5.30E-01        | 6.08E-01        | GUSTO only    | 1.13  | (0.5-1.76)    | <b>4.28E-04</b> | <b>8.68E-04</b> | -0.39 | (-1.23-0.45)  | 3.66E-01        | 4.72E-01        | notSig        | -0.52 | (-1.04-0)     | 5.10E-02        | 7.49E-02        |
| PE(18:0_20:4)       | 2.38  | (1.53-3.23)   | <b>3.77E-08</b> | <b>5.65E-07</b> | GUSTO and BIS | 2.16  | (1.65-2.66)   | <b>4.96E-17</b> | <b>1.09E-15</b> | -0.57 | (-1.22-0.09)  | 9.09E-02        | 1.49E-01        | notSig        | -0.64 | (-1.09--0.19) | <b>5.18E-03</b> | <b>9.53E-03</b> |
| PE(38:5) (a)        | 0.92  | (-0.05-1.89)  | 6.22E-02        | 1.08E-01        | notSig        | 0.34  | (-0.24-0.93)  | 2.51E-01        | 3.00E-01        | 0.11  | (-0.83-1.05)  | 8.14E-01        | 8.68E-01        | notSig        | -0.39 | (-0.93-0.14)  | 1.52E-01        | 1.99E-01        |
| PE(38:5) (b)        | 0.26  | (-0.78-1.32)  | 6.22E-01        | 6.95E-01        | notSig        | -0.42 | (-1.08-0.25)  | 2.16E-01        | 2.63E-01        | 0.79  | (-0.17-1.74)  | 1.07E-01        | 1.70E-01        | notSig        | 0.61  | (-0.1-1.33)   | 9.38E-02        | 1.30E-01        |
| PE(16:0_22:6)       | 1.18  | (0.35-2.02)   | <b>5.47E-03</b> | <b>1.37E-02</b> | BIS only      | 0.52  | (-0.04-1.07)  | 6.72E-02        | 9.04E-02        | -1.30 | (-2.02--0.58) | <b>4.24E-04</b> | <b>1.43E-03</b> | GUSTO and BIS | -1.45 | (-1.94--0.96) | <b>7.06E-09</b> | <b>2.29E-08</b> |
| PE(17:0_22:6)       | 1.36  | (0.44-2.29)   | <b>3.86E-03</b> | <b>1.03E-02</b> | BIS only      | 0.41  | (-0.17-1)     | 1.66E-01        | 2.05E-01        | -2.48 | (-3.39--1.57) | <b>1.16E-07</b> | <b>8.56E-07</b> | GUSTO and BIS | -1.81 | (-2.32--1.31) | <b>1.99E-12</b> | <b>8.56E-12</b> |
| PE(18:0_22:4)       | 0.13  | (-1.13-1.41)  | 8.43E-01        | 8.75E-01        | notSig        | 0.39  | (-0.33-1.11)  | 2.84E-01        | 3.35E-01        | -0.55 | (-1.49-0.4)   | 2.56E-01        | 3.58E-01        | notSig        | -0.36 | (-0.98-0.26)  | 2.58E-01        | 3.13E-01        |
| PE(18:0_22:5) (n3)  | 0.13  | (-0.85-1.12)  | 7.97E-01        | 8.44E-01        | notSig        | 0.34  | (-0.24-0.92)  | 2.48E-01        | 2.97E-01        | -1.32 | (-2.36--0.28) | <b>1.32E-02</b> | <b>2.91E-02</b> | GUSTO and BIS | -1.17 | (-1.81--0.54) | <b>3.11E-04</b> | <b>6.80E-04</b> |
| PE(18:0_22:5) (n6)  | 1.06  | (-0.23-2.37)  | 1.08E-01        | 1.69E-01        | notSig        | 0.62  | (-0.13-1.38)  | 1.07E-01        | 1.38E-01        | 0.67  | (-0.32-1.66)  | 1.85E-01        | 2.74E-01        | notSig        | 0.11  | (-0.59-0.81)  | 7.56E-01        | 8.01E-01        |
| PE(18:0_22:6)       | 2.33  | (1.39-3.27)   | <b>1.15E-06</b> | <b>1.01E-05</b> | GUSTO and BIS | 1.75  | (1.14-2.35)   | <b>1.52E-08</b> | <b>7.10E-08</b> | -1.47 | (-2.33--0.62) | <b>7.59E-04</b> | <b>2.41E-03</b> | GUSTO and BIS | -1.55 | (-2.12--0.97) | <b>1.26E-07</b> | <b>3.68E-07</b> |
| PE(O-34:1)          | -2.21 | (-2.95--1.45) | <b>1.58E-08</b> | <b>2.93E-07</b> | GUSTO and BIS | -1.71 | (-2.17--1.25) | <b>2.82E-13</b> | <b>2.67E-12</b> | 0.48  | (-0.39-1.35)  | 2.83E-01        | 3.84E-01        | notSig        | 0.42  | (-0.27-1.12)  | 2.34E-01        | 2.87E-01        |
| PE(O-16:0/18:2)     | -3.11 | (-4.1--2.11)  | <b>2.65E-09</b> | <b>5.59E-08</b> | GUSTO and BIS | -2.88 | (-3.49--2.27) | <b>2.43E-20</b> | <b>8.67E-19</b> | -0.32 | (-1.36-0.72)  | 5.47E-01        | 6.32E-01        | notSig        | -0.30 | (-1.22-0.62)  | 5.25E-01        | 5.78E-01        |
| PE(O-18:1/18:2)     | -2.82 | (-3.81--1.82) | <b>5.07E-08</b> | <b>7.13E-07</b> | GUSTO and BIS | -2.01 | (-2.6--1.42)  | <b>2.84E-11</b> | <b>2.06E-10</b> | 0.11  | (-1.19-1.42)  | 8.63E-01        | 8.98E-01        | notSig        | 0.08  | (-0.71-0.86)  | 8.45E-01        | 8.83E-01        |
| PE(O-16:0/20:4)     | -1.78 | (-            |                 |                 |               |       |               |                 |                 |       |               |                 |                 |               |       |               |                 |                 |

|                      |       |               |                 |                 |               |       |               |                 |                 |       |               |                 |                 |               |       |               |                 |                 |
|----------------------|-------|---------------|-----------------|-----------------|---------------|-------|---------------|-----------------|-----------------|-------|---------------|-----------------|-----------------|---------------|-------|---------------|-----------------|-----------------|
| PE(O-18:0/20:4)      | -2.73 | (-3.77--1.67) | <b>6.40E-07</b> | <b>6.19E-06</b> | GUSTO and BIS | -2.16 | (-2.8--1.51)  | <b>6.33E-11</b> | <b>4.45E-10</b> | -0.36 | (-1.27-0.56)  | 4.41E-01        | 5.40E-01        | notSig        | -0.25 | (-0.86-0.36)  | 4.19E-01        | 4.77E-01        |
| PE(O-38:5) (a)       | -1.81 | (-2.64--0.96) | <b>3.03E-05</b> | <b>1.62E-04</b> | GUSTO and BIS | -1.59 | (-2.14--1.05) | <b>1.09E-08</b> | <b>5.15E-08</b> | 0.15  | (-0.74-1.04)  | 7.37E-01        | 8.01E-01        | notSig        | 0.00  | (-0.55-0.55)  | 9.99E-01        | 9.99E-01        |
| PE(O-38:5) (b)       | -2.58 | (-3.46--1.69) | <b>2.31E-08</b> | <b>3.83E-07</b> | GUSTO and BIS | -2.19 | (-2.72--1.66) | <b>5.21E-16</b> | <b>8.63E-15</b> | 1.10  | (0.32-1.88)   | <b>5.82E-03</b> | <b>1.48E-02</b> | BIS only      | 0.73  | (0.12-1.33)   | <b>1.88E-02</b> | <b>3.11E-02</b> |
| PE(O-16:0/22:6)      | -0.91 | (-1.61--0.19) | <b>1.31E-02</b> | <b>2.89E-02</b> | GUSTO and BIS | -0.98 | (-1.45--0.5)  | <b>5.25E-05</b> | <b>1.27E-04</b> | 1.08  | (0.4-1.77)    | <b>2.01E-03</b> | <b>5.82E-03</b> | BIS only      | 0.86  | (0.34-1.38)   | <b>1.29E-03</b> | <b>2.57E-03</b> |
| PE(O-18:0/22:6)      | -2.02 | (-2.77--1.26) | <b>2.50E-07</b> | <b>2.90E-06</b> | GUSTO and BIS | -1.73 | (-2.2--1.25)  | <b>8.23E-13</b> | <b>7.34E-12</b> | 0.67  | (-0.05-1.38)  | 6.69E-02        | 1.18E-01        | notSig        | 0.31  | (-0.17-0.79)  | 2.10E-01        | 2.64E-01        |
| PE(O-18:1/22:6)      | -1.03 | (-1.86--0.2)  | <b>1.49E-02</b> | <b>3.20E-02</b> | GUSTO and BIS | -1.12 | (-1.61--0.63) | <b>6.55E-06</b> | <b>1.89E-05</b> | 0.99  | (0.3-1.68)    | <b>5.18E-03</b> | <b>1.34E-02</b> | BIS only      | 0.46  | (0.01-0.91)   | <b>4.42E-02</b> | 6.63E-02        |
| PE(P-16:0/18:1)      | -1.81 | (-2.49--1.14) | <b>2.31E-07</b> | <b>2.75E-06</b> | GUSTO and BIS | -1.33 | (-1.74--0.92) | <b>2.70E-10</b> | <b>1.67E-09</b> | 0.95  | (0.21-1.68)   | <b>1.22E-02</b> | <b>2.75E-02</b> | GUSTO and BIS | 1.32  | (0.8-1.84)    | <b>5.85E-07</b> | <b>1.62E-06</b> |
| PE(P-16:0/18:2)      | -3.01 | (-3.92--2.09) | <b>3.43E-10</b> | <b>1.22E-08</b> | GUSTO and BIS | -2.05 | (-2.59--1.51) | <b>1.25E-13</b> | <b>1.27E-12</b> | -0.23 | (-1.23-0.78)  | 6.55E-01        | 7.31E-01        | notSig        | -0.03 | (-0.7-0.65)   | 9.39E-01        | 9.45E-01        |
| PE(P-16:0/20:4)      | -0.54 | (-1.35-0.28)  | 1.97E-01        | 2.76E-01        | notSig        | -0.16 | (-0.7-0.39)   | 5.70E-01        | 6.28E-01        | -0.21 | (-0.98-0.55)  | 5.81E-01        | 6.62E-01        | notSig        | -0.22 | (-0.77-0.32)  | 4.24E-01        | 4.81E-01        |
| PE(P-16:0/20:5)      | -1.52 | (-2.9--0.12)  | <b>3.36E-02</b> | 6.34E-02        | notSig        | -1.25 | (-2.21--0.29) | <b>1.09E-02</b> | <b>1.69E-02</b> | -1.53 | (-2.72--0.33) | <b>1.24E-02</b> | <b>2.78E-02</b> | BIS only      | -1.32 | (-2.33--0.31) | <b>1.03E-02</b> | <b>1.75E-02</b> |
| PE(P-16:0/22:4)      | -0.51 | (-1.12-0.11)  | 1.07E-01        | 1.68E-01        | notSig        | -0.02 | (-0.44-0.39)  | 9.13E-01        | 9.29E-01        | 0.20  | (-0.4-0.8)    | 5.10E-01        | 6.06E-01        | notSig        | 0.21  | (-0.25-0.67)  | 3.69E-01        | 4.25E-01        |
| PE(P-16:0/22:5) (n3) | -0.75 | (-1.45--0.05) | <b>3.53E-02</b> | 6.58E-02        | notSig        | -0.67 | (-1.13--0.22) | <b>3.41E-03</b> | <b>5.86E-03</b> | -0.42 | (-1.34-0.49)  | 3.64E-01        | 4.71E-01        | notSig        | -0.46 | (-1.03-0.11)  | 1.17E-01        | 1.59E-01        |
| PE(P-16:0/22:5) (n6) | -1.25 | (-2.1--0.39)  | <b>4.62E-03</b> | <b>1.20E-02</b> | GUSTO and BIS | -0.93 | (-1.45--0.42) | <b>3.56E-04</b> | <b>7.37E-04</b> | 1.34  | (0.71-1.96)   | <b>2.94E-05</b> | <b>1.32E-04</b> | GUSTO and BIS | 1.19  | (0.69-1.69)   | <b>3.53E-06</b> | <b>9.25E-06</b> |
| PE(P-16:0/22:6)      | 0.45  | (-0.17-1.07)  | 1.53E-01        | 2.25E-01        | notSig        | 0.26  | (-0.17-0.68)  | 2.32E-01        | 2.79E-01        | 0.77  | (0.1-1.44)    | <b>2.50E-02</b> | 5.11E-02        | notSig        | 0.48  | (0-0.96)      | 5.24E-02        | 7.67E-02        |
| PE(P-17:0/20:4) (a)  | -0.84 | (-1.8-0.13)   | 8.81E-02        | 1.42E-01        | notSig        | -0.53 | (-1.17-0.11)  | 1.05E-01        | 1.36E-01        | -1.32 | (-2.15--0.49) | <b>1.84E-03</b> | <b>5.41E-03</b> | BIS only      | -0.72 | (-1.21--0.23) | <b>4.12E-03</b> | <b>7.69E-03</b> |
| PE(P-17:0/20:4) (b)  | -0.50 | (-1.49-0.5)   | 3.25E-01        | 4.16E-01        | notSig        | -0.32 | (-0.95-0.3)   | 3.12E-01        | 3.60E-01        | -1.13 | (-1.94--0.32) | <b>6.49E-03</b> | <b>1.61E-02</b> | GUSTO and BIS | -1.02 | (-1.52--0.52) | <b>5.78E-05</b> | <b>1.38E-04</b> |
| PE(P-17:0/22:6) (a)  | -0.39 | (-1.14-0.36)  | 3.06E-01        | 3.98E-01        | GUSTO only    | -0.79 | (-1.34--0.25) | <b>4.32E-03</b> | <b>7.34E-03</b> | -0.87 | (-1.63--0.11) | <b>2.46E-02</b> | 5.07E-02        | notSig        | -0.58 | (-1.12--0.03) | <b>3.76E-02</b> | 5.75E-02        |
| PE(P-17:0/22:6) (b)  | -0.12 | (-0.83-0.61)  | 7.54E-01        | 8.10E-01        | notSig        | -0.43 | (-0.94-0.08)  | 9.62E-02        | 1.25E-01        | -0.68 | (-1.44-0.08)  | 8.09E-02        | 1.35E-01        | notSig        | -0.55 | (-1.06--0.04) | <b>3.54E-02</b> | 5.51E-02        |
| PE(P-18:0/18:1)      | -1.84 | (-2.62--1.06) | <b>5.27E-06</b> | <b>3.88E-05</b> | GUSTO and BIS | -1.47 | (-1.94--1)    | <b>1.05E-09</b> | <b>5.94E-09</b> | 0.19  | (-0.8-1.17)   | 7.10E-01        | 7.82E-01        | GUSTO only    | 0.68  | (0.06-1.3)    | <b>3.12E-02</b> | <b>4.91E-02</b> |
| PE(P-18:0/18:2)      | -3.19 | (-4.16--2.2)  | <b>6.48E-10</b> | <b>2.00E-08</b> | GUSTO and BIS | -2.24 | (-2.78--1.7)  | <b>3.46E-16</b> | <b>5.95E-15</b> | -1.08 | (-2.39-0.23)  | 1.07E-01        | 1.70E-01        | notSig        | -0.44 | (-1.17-0.29)  | 2.40E-01        | 2.94E-01        |
| PE(P-18:0/20:4)      | -0.75 | (-1.65-0.15)  | 1.03E-01        | 1.63E-01        | notSig        | -0.42 | (-1.01-0.16)  | 1.55E-01        | 1.93E-01        | -0.57 | (-1.42-0.28)  | 1.87E-01        | 2.77E-01        | notSig        | -0.62 | (-1.16--0.08) | <b>2.48E-02</b> | <b>4.01E-02</b> |
| PE(P-18:0/20:5)      | -1.77 | (-3.19--0.32) | <b>1.70E-02</b> | <b>3.58E-02</b> | GUSTO and BIS | -1.70 | (-2.69--0.71) | <b>7.76E-04</b> | <b>1.48E-03</b> | -1.78 | (-3.05--0.51) | <b>6.10E-03</b> | <b>1.54E-02</b> | GUSTO and BIS | -1.86 | (-2.82--0.9)  | <b>1.42E-04</b> | <b>3.23E-04</b> |
| PE(P-18:0/22:4)      | -0.89 | (-1.55--0.23) | <b>8.02E-03</b> | <b>1.86E-02</b> | GUSTO and BIS | -0.80 | (-1.24--0.36) | <b>3.71E-04</b> | <b>7.61E-04</b> | -0.31 | (-1.13-0.51)  | 4.52E-01        | 5.49E-01        | notSig        | -0.30 | (-0.87-0.27)  | 3.05E-01        | 3.63E-01        |
| PE(P-18:0/22:5) (n3) | -1.54 | (-2.33--0.75) | <b>1.44E-04</b> | <b>6.01E-04</b> | GUSTO and BIS | -1.08 | (-1.55--0.6)  | <b>9.03E-06</b> | <b>2.55E-05</b> | -1.10 | (-2.14--0.07) | <b>3.66E-02</b> | 7.14E-02        | notSig        | -0.59 | (-1.13--0.06) | <b>2.86E-02</b> | <b>4.54E-02</b> |
| PE(P-18:0/22:5) (n6) | -1.95 | (-2.79--1.11) | <b>6.84E-06</b> | <b>4.67E-05</b> | GUSTO and BIS | -1.51 | (-1.98--1.03) | <b>5.07E-10</b> | <b>2.94E-09</b> | 0.68  | (0.01-1.36)   | <b>4.72E-02</b> | 9.00E-02        | notSig        | 0.52  | (0.05-0.99)   | <b>3.06E-02</b> | <b>4.84E-02</b> |
| PE(P-18:0/22:6)      | -1.05 | (-1.77--0.32) | <b>4.98E-03</b> | <b>1.27E-02</b> | GUSTO and BIS | -0.90 | (-1.39--0.42) | <b>2.55E-04</b> | <b>5.43E-04</b> | 0.02  | (-0.7-0.75)   | 9.46E-01        | 9.56E-01        | notSig        | -0.02 | (-0.51-0.46)  | 9.30E-01        | 9.40E-01        |
| PE(P-18:1/18:1)      | -1.46 | (-2.18--0.74) | <b>8.73E-05</b> | <b>3.93E-04</b> | GUSTO and BIS | -1.11 | (-1.55--0.67) | <b>7.10E-07</b> | <b>2.39E-06</b> | 0.72  | (-0.19-1.62)  | 1.20E-01        | 1.86E-01        | notSig        | 0.48  | (-0.04-1)     | 7.13E-02        | 1.01E-01        |
| PE(P-18:1/22:4)      | 0.05  | (-0.54-0.64)  | 8.67E-01        | 8.96E-01        | notSig        | -0.10 | (-0.54-0.34)  | 6.57E-01        | 7.07E-01        | 0.48  | (-0.11-1.07)  | 1.14E-01        | 1.80E-01        | notSig        | 0.44  | (-0.06-0.93)  | 8.65E-02        | 1.20E-01        |
| PE(P-18:1/22:5) (a)  | -0.66 | (-1.33-0.02)  | 5.54E-02        | 9.80E-02        | GUSTO only    | -0.69 | (-1.14--0.23) | <b>3.15E-03</b> | <b>5.42E-03</b> | -0.42 | (-1.4-0.57)   | 4.04E-01        | 5.07E-01        | notSig        | -0.39 | (-0.93-0.15)  | 1.54E-01        | 2.01E-01        |
| PE(P-18:1/22:6) (a)  | 0.34  | (-0.4-1.08)   | 3.69E-01        | 4.59E-01        | notSig        | -0.13 | (-0.62-0.36)  | 5.91E-01        | 6.45E-01        | 0.73  | (0.08-1.38)   | <b>2.74E-02</b> | 5.55E-02        | notSig        | 0.37  | (-0.11-0.85)  | 1.29E-01        | 1.74E-01        |
| PE(P-20:0/18:1)      | -1.69 | (-2.4--0.97)  | <b>4.75E-06</b> | <b>3.55E-05</b> | GUSTO and BIS | -1.45 | (-1.92--0.98) | <b>1.21E-09</b> | <b>6.70E-09</b> | -0.28 | (-1-0.45)     | 4.50E-01        | 5.48E-01        | notSig        | -0.17 | (-0.84-0.5)   | 6.29E-01        | 6.82E-01        |
| PE(P-20:0/18:2)      | -2.85 | (-3.78--1.9)  | <b>6.34E-09</b> | <b>1.28E-07</b> | GUSTO and BIS | -2.07 | (-2.55--1.6)  | <b>1.23E-17</b> | <b>3.00E-16</b> | -1.15 | (-2.34-0.03)  | 5.63E-02        | 1.03E-01        | notSig        | -0.16 | (-0.58-0.25)  | 4.35E-01        | 4.91E-01        |
| PE(P-20:0/20:4)      | -0.84 | (-1.62--0.06) | <b>3.56E-02</b> | 6.61E-02        | notSig        | -0.42 | (-0.89-0.06)  | 8.63E-02        | 1.13E-01        | -0.60 | (-1.34-0.14)  | 1.14E-01        | 1.80E-01        | notSig        | -0.60 | (-1.17--0.03) | <b>3.95E-02</b> | 6.03E-02        |
| PE(P-20:0/22:6)      | -0.97 | (-1.7--0.23)  | <b>1.07E-02</b> | <b>2.42E-02</b> | GUSTO and BIS | -0.84 | (-1.27--0.42) | <b>1.10E-04</b> | <b>2.57E-04</b> | -0.45 | (-1.11-0.2)   | 1.76E-01        | 2.65E-01        | GUSTO only    | -0.59 | (-1.02--0.16) | <b>7.17E-03</b> | <b>1.26E-02</b> |
| PE(P-20:1/20:4)      | -0.92 | (-1.92-0.09)  | 7.48E-02        | 1.23E-01        | notSig        | -0.63 | (-1.29-0.03)  | 6.27E-02        | 8.48E-02        | 0.15  | (-0.6-0.91)   | 6.91E-01        | 7.64E-01        | notSig        | -0.17 | (-0.79-0.45)  | 5.97E-01        | 6.53E-01        |
| PG(36:1)             | 0.58  | (-0.39-1.56)  | 2.39E-01        | 3.26E-01        | notSig        | -0.01 | (-0.56-0.54)  | 9.70E-01        | 9.74E-01        | -0.71 | (-1.79-0.37)  | 1.96E-01        | 2.87E-01        | notSig        | -1.01 | (-1.81--0.21) | <b>1.38E-02</b> | <b>2.32E-02</b> |
| PI(16:0/16:0)        | -2.67 | (-3.93--1.39) | <b>5.08E-05</b> | <b>2.48E-04</b> | GUSTO and BIS | -2.52 | (-3.27--1.77) | <b>4.31E-11</b> | <b>3.08E-10</b> | -1.03 | (-2.08-0.01)  | 5.29E-02        | 9.86E-02        | notSig        | -0.53 | (-1.25-0.18)  | 1.44E-01        | 1.89E-01        |
| PI(16:0_16:1)        | -1.35 | (-2.78-0.1)   | 6.77E-02        | 1.15E-01        | GUSTO only    | -1.60 | (-2.45--0.74) | <b>2.67E-04</b> | <b>5.63E-04</b> | 0.45  | (-0.31-1.22)  | 2.46E-01        | 3.47E-01        | notSig        | 0.57  | (-0.01-1.14)  | 5.26E-02        | 7.68E-02        |
| PI(34:0)             | -1.97 | (-3.12--0.81) | <b>9.36E-04</b> | <b>3.00E-03</b> | GUSTO and BIS | -2.39 | (-3.11--1.66) | <b>1.06E-10</b> | <b>6.93E-10</b> | -1.46 | (-2.58--0.34) | <b>1.06E-02</b> | <b>2.46E-02</b> | GUSTO and BIS | -1.64 | (-2.47--0.81) | <b>1.00E-04</b> | <b>2.33E-04</b> |
| PI(34:1)             | -1.27 | (-2.17--0.37) | <b>6.11E-03</b> | <b>1.49E-02</b> | GUSTO and BIS | -1.75 | (-2.29--1.21) | <b>1.84E-10</b> | <b>1.19E-09</b> | -0.40 | (-1.36-0.56)  | 4.09E-01        | 5.10E-01        | notSig        | -0.26 | (-0.79-0.27)  | 3.41E-01        | 4.01E-01        |
| PI(17:0_18:1)        | -1.25 | (-2.12--0.38) | <b>5.16E-03</b> | <b>1.31E-02</b> | GUSTO and BIS | -2.03 | (-2.51--1.55) | <b>1.31E-16</b> | <b>2.63E-15</b> | -1.48 | (-2.45--0.51) | <b>2.82E-03</b> | <b>7.66E-03</b> | GUSTO and BIS | -1.40 | (-2.1--0.69)  | <b>9.88E-05</b> | <b>2.30E-04</b> |
| PI(17:0_18:2)        | -1.54 | (-2.27--0.8)  | <b>4.83E-05</b> | <b>2.39E-04</b> | GUSTO and BIS | -2.21 | (-2.69--1.73) | <b>1.21E-19</b> | <b>3.74E-18</b> | -2.27 | (-3.22--1.32) | <b>3.19E-06</b> | <b>1.78E-05</b> | GUSTO and BIS | -2.10 | (-2.8--1.41)  | <b>2.92E-09</b> | <b>9.81E-09</b> |
| PI(18:0_18:1)        | -1.55 | (-2.47--0.61) | <b>1.23E-03</b> | <b>3.77E-03</b> | GUSTO and BIS | -1.80 | (-2.36--1.24) | <b>3.52E-10</b> | <b>2.12E-09</b> | -0.70 | (-1.98-0.58)  | 2.86E-01        | 3.87E-01        | GUSTO only    | -1.07 | (-1.68--0.46) | <b>5.58E-04</b> | <b>1.19E-03</b> |
| PI(36:2)             | -1.10 | (-1.87--0.32) | <b>6.05E-03</b> | <b>1.49E-02</b> | GUSTO and BIS | -1.63 | (-2.1--1.16)  | <b>8.04E-12</b> | <b>6.66E-11</b> | -1.57 | (-2.58--0.57) | <b>2.22E-03</b> | <b>6.33E-03</b> | GUSTO and BIS | -1.31 | (-1.81--0.8)  | <b>3.64E-07</b> | <b>1.03E-06</b> |
| PI(18:1_18:2)        | -2.97 | (-3.88--2.06) | <b>5.26E-10</b> | <b>1.74E-08</b> | GUSTO and BIS | -2.76 | (-3.28--2.24) | <b>1.37E-25</b> | <b>1.06E-23</b> | -1.44 | (-2.14--0.73) | <b>6.74E-05</b> | <b>2.70E-04</b> | GUSTO and BIS | -1.46 | (-1.88--1.04) | <b>1.07E-11</b> | <b>4.36E-11</b> |
| PI(16:0_20:3) (a)    | -2.61 | (-3.42--1.79) | <b>9.45E-10</b> | <b>2.34E-08</b> | GUSTO and BIS | -2.34 | (-2.85--1.82) | <b>4.52E-19</b> | <b>1.31E-17</b> | 0.12  | (-0.47-0.72)  | 6.86E-01        | 7.60E-01        | notSig        | 0.18  | (-0.23-0.58)  | 3.90E-01        | 4.48E-01        |
| PI(16:0_20:3) (b)    | -3.52 | (-4.53--2.5)  | <b>4.64E-11</b> | <b>3.37E-09</b> | GUSTO and BIS | -2.83 | (-3.43--2.23) | <b>1.80E-20</b> | <b>6.97E-19</b> | 2.95  | (2.17-3.74)   | <b>4.47E-13</b> | <b>7.41E-12</b> | GUSTO and BIS | 2.97  | (2.33-3.61)   | <b>9.90E-20</b> | <b>6.38E-19</b> |
| PI(16:0_20:4)        | -0.83 | (-1.74-0.09)  | 7.58E-02        | 1.24E-01        | GUSTO only    | -1.27 | (-1.76--0.77) | <b>4.90E-07</b> | <b>1.76E-06</b> | -0.04 | (-0.53-0.46)  | 8.87E-01        | 9.11E-01        | notSig        | 0.03  | (-0.34-0.4)   | 8.62E-01        | 8.91E-01        |
| PI(18:0_20:2)        | -1.77 | (-2.69--0.85) | <b>1.90E-04</b> | <b>7.62E-04</b> | GUSTO and BIS | -2.33 | (-2.89--1.77) | <b>2.72E-16</b> | <b>4.86E</b>    |       |               |                 |                 |               |       |               |                 |                 |

|                    |       |               |                 |                 |               |       |               |                 |                 |       |               |                 |                 |               |       |               |                 |                 |
|--------------------|-------|---------------|-----------------|-----------------|---------------|-------|---------------|-----------------|-----------------|-------|---------------|-----------------|-----------------|---------------|-------|---------------|-----------------|-----------------|
| PI(38:6)           | -1.57 | (-2.46--0.67) | <b>6.34E-04</b> | <b>2.21E-03</b> | GUSTO and BIS | -2.26 | (-2.78--1.74) | <b>2.27E-17</b> | <b>5.27E-16</b> | -1.31 | (-1.85--0.77) | <b>2.00E-06</b> | <b>1.15E-05</b> | GUSTO and BIS | -1.12 | (-1.5--0.74)  | <b>7.75E-09</b> | <b>2.48E-08</b> |
| PI(18:0_22:4)      | -0.78 | (-1.53--0.02) | <b>4.48E-02</b> | 8.05E-02        | GUSTO only    | -1.04 | (-1.53--0.55) | <b>3.56E-05</b> | <b>8.91E-05</b> | 0.96  | (0.44-1.48)   | <b>3.38E-04</b> | <b>1.18E-03</b> | GUSTO and BIS | 1.04  | (0.62-1.46)   | <b>1.02E-06</b> | <b>2.78E-06</b> |
| PI(18:0_22:5) (n3) | -0.80 | (-1.55--0.04) | <b>3.81E-02</b> | 6.96E-02        | GUSTO only    | -1.32 | (-1.82--0.82) | <b>2.13E-07</b> | <b>8.44E-07</b> | -1.29 | (-2.04--0.53) | <b>8.62E-04</b> | <b>2.70E-03</b> | GUSTO and BIS | -1.26 | (-1.76--0.76) | <b>6.62E-07</b> | <b>1.83E-06</b> |
| PI(18:0_22:6)      | -0.69 | (-1.49-0.12)  | 9.45E-02        | 1.51E-01        | GUSTO only    | -1.50 | (-2--0.99)    | <b>6.63E-09</b> | <b>3.31E-08</b> | -0.85 | (-1.42--0.27) | <b>4.13E-03</b> | <b>1.09E-02</b> | GUSTO and BIS | -0.98 | (-1.38--0.59) | <b>9.58E-07</b> | <b>2.61E-06</b> |
